# Supplementary material
Source: PubMed Central journal article supplement (PMC11373932)
Supplement: PBI-22-915-s001.pdf [file PBI-22-915-s001.pdf]

**Table S3 DEGs from RNA-seq compared between with W7, gw9 and OE****down-regulate genes in gw9 compared with W7 up-regulate genes in gw9 compared with W7 up-regulate genes in gw9 compared with W7 down-regulate genes in gw9 compared with W7**

| Gene loci    | log2FoldChange | padj        | Gene loci    | log2FoldChange | padj      | Gene loci     | log2FoldChange | padj      | Gene loci    | log2FoldChange | padj        |
|--------------|----------------|-------------|--------------|----------------|-----------|---------------|----------------|-----------|--------------|----------------|-------------|
| Os03g0103200 | 6.856686199    | 2.24E-22    | Os04g0677600 | -10.95310262   | 1.43E-108 | Os03g0223301  | 11.82138149    | 7.94E-171 | Os07g0115200 | -14.45003972   | 0           |
| Os06g0324400 | 6.670743454    | 3.51E-08    | Os01g0136600 | -10.36841345   | 1.35E-72  | Os01g0219500  | 10.47213279    | 1.44E-77  | Os10g0328100 | -14.24806538   | 0           |
| Os02g0677300 | 6.515522906    | 8.74E-32    | Os04g0611700 | -9.258860472   | 1.03E-38  | Os01g0136600  | 10.35446347    | 3.07E-67  | Os07g0162450 | -12.7968001    | 0           |
| Os09g0552500 | 6.368964473    | 2.34E-06    | Os11g0678301 | -9.148976862   | 7.28E-34  | Os01g0802600  | 9.657143416    | 6.57E-202 | Os03g0629800 | -12.38346436   | 0           |
| Os09g0522000 | 6.304733776    | 1.09E-57    | Os06g0574900 | -9.067942251   | 1.06E-95  | Os05g0442400  | 9.069194207    | 2.71E-30  | Os02g0297550 | -10.75660217   | 1.53E-93    |
| Os03g0663750 | 6.107572948    | 7.73E-290   | Os03g0223301 | -9.01007705    | 1.45E-175 | Os03g0846200  | 8.9820491      | 2.82E-31  | Os03g0115800 | -10.26955823   | 0           |
| Os04g0206350 | 6.045628244    | 0.000159494 | Os03g0846200 | -8.996284925   | 2.10E-34  | Os04g0419400  | 8.921380368    | 5.67E-30  | Os01g0356951 | -9.811193738   | 4.19E-43    |
| Os07g0670300 | 5.95498363     | 4.07E-05    | Os09g0525500 | -8.942088771   | 4.19E-25  | Os04g0323800  | 8.638912995    | 7.00E-20  | Os01g0537250 | -9.756764116   | 0           |
| Os09g0455500 | 5.863295482    | 0.00037405  | Os06g0195800 | -8.901053319   | 8.20E-30  | Os08g0300501  | 8.610687706    | 5.31E-24  | Os03g0233700 | -9.756198151   | 5.31E-34    |
| Os02g0179200 | 5.857333408    | 0.000145785 | Os04g0323800 | -8.652661133   | 1.76E-21  | Os05g0421450  | 8.508357704    | 1.14E-23  | Os04g0397901 | -9.378954815   | 4.67E-34    |
| Os11g0659200 | 5.821960561    | 1.09E-29    | Os08g0300501 | -8.6243035     | 3.42E-26  | Os09g0358000  | 8.48347448     | 1.32E-23  | Os12g0142900 | -9.070913565   | 2.64E-30    |
| Os03g0183200 | 5.790115687    | 1.32E-39    | Os09g0358000 | -8.497671415   | 6.32E-26  | Os11g0540100  | 8.27528772     | 5.43E-19  | Os04g0397800 | -8.845197435   | 1.13E-27    |
| Os01g0369900 | 5.751993103    | 0.000542121 | Os01g0219500 | -8.469801537   | 1.74E-83  | Os11g0616900  | 8.219862723    | 2.95E-19  | Os11g0538400 | -8.828751578   | 3.35E-22    |
| Os03g0289800 | 5.69655961     | 0.000936281 | Os08g0207800 | -8.468915412   | 7.83E-23  | Os02g0181300  | 8.202498061    | 2.03E-231 | Os07g0442800 | -8.346294212   | 0           |
| Os05g0493800 | 5.688477503    | 0.000772807 | Os11g0540100 | -8.301179426   | 1.44E-20  | Os08g0545800  | 8.144346965    | 2.00E-13  | Os03g0426350 | -7.98030581    | 1.23E-215   |
| Os07g0529000 | 5.640020093    | 0.000936281 | Os05g0399700 | -8.251477131   | 2.05E-18  | Os11g0181200  | 8.131498228    | 2.10E-48  | Os03g0105500 | -7.845231913   | 7.57E-127   |
| Os10g0503300 | 5.597115091    | 0.001292693 | Os11g0616900 | -8.234346251   | 6.78E-21  | Os11g0678200  | 8.120806485    | 8.66E-17  | Os05g0580200 | -7.757441837   | 1.04E-11    |
| Os04g0433100 | 5.38559717     | 0.002523717 | Os08g0545800 | -8.158401899   | 2.21E-14  | Os11g0454000  | 7.897106865    | 2.64E-11  | Os01g0262401 | -7.3822564     | 1.63E-183   |
| Os01g0768333 | 5.365598769    | 0.003587571 | Os11g0678200 | -8.135037952   | 2.63E-18  | Os02g0157100  | 7.814134697    | 4.79E-14  | Os06g0700750 | -7.19490053    | 5.60E-09    |
| Os04g0122000 | 5.310198043    | 4.70E-19    | Os03g0683500 | -8.041095931   | 5.02E-12  | Os03g0645900  | 7.799751588    | 3.34E-71  | Os01g0246400 | -7.14744955    | 1.58E-08    |
| Os12g0409900 | 5.282153658    | 0.003587571 | Os03g0687800 | -7.998611068   | 4.60E-18  | Os05g0545300  | 7.786902115    | 2.34E-11  | Os06g0484800 | -7.099680316   | 8.73E-10    |
| Os10g0527800 | 5.281605717    | 0.003587571 | Os08g0121975 | -7.961667059   | 4.35E-13  | Os04g0675400  | 7.76353228     | 4.02E-142 | Os08g0207300 | -6.776698363   | 1.71E-24    |
| Os03g0428200 | 5.268465819    | 5.73E-47    | Os09g0481650 | -7.951607954   | 6.00E-18  | Os12g0202851  | 7.756730833    | 6.99E-11  | Os08g0315200 | -6.591851346   | 2.02E-34    |
| Os10g0109600 | 5.247299711    | 0.005131585 | Os03g0654800 | -7.743918953   | 5.70E-11  | Os03g0654800  | 7.729482801    | 2.15E-10  | Os01g0694500 | -6.200824106   | 9.90E-05    |
| Os03g0842900 | 5.235671007    | 0.005131585 | Os06g0572000 | -7.68207653    | 3.67E-13  | Os08g0240200  | 7.688241191    | 1.21E-13  | Os01g0730400 | -6.121197982   | 6.02E-05    |
| Os10g0530600 | 5.215217532    | 0.003885041 | Os04g0565750 | -7.660103073   | 5.80E-12  | Os04g0565750  | 7.64559792     | 4.84E-11  | Os12g0551200 | -5.914608918   | 7.59E-09    |
| Os07g0443500 | 5.212950088    | 0.005131585 | Os06g0652100 | -7.618712497   | 2.56E-13  | Os05g0203912  | 7.643710242    | 6.86E-11  | Os03g0626700 | -5.86392463    | 0.000388803 |
| Os09g0457900 | 5.187819324    | 1.12E-09    | Os01g0579000 | -7.610642398   | 6.51E-12  | Os01g0579000  | 7.595721291    | 5.81E-11  | Os05g0215000 | -5.854143282   | 0.000388803 |
| Os10g0460733 | 5.17587998     | 0.005131585 | Os01g0932550 | -7.592124812   | 9.82E-12  | Os01g0932550  | 7.577684764    | 8.35E-11  | Os07g0511400 | -5.845476052   | 0           |
| Os06g0321700 | 5.122444095    | 0.00744999  | Os04g0599300 | -7.5015011     | 2.33E-58  | Os03g0723400  | 7.570399956    | 5.47E-120 | Os05g0425650 | -5.78455938    | 0.000522083 |
| Os11g0705200 | 5.109993196    | 0.006179308 | Os11g0184600 | -7.451068505   | 2.29E-10  | Os06g0127100  | 7.538276942    | 1.22E-42  | Os01g0937800 | -5.599047055   | 0.001325812 |
| Os01g0382200 | 5.109694252    | 0.0050663   | Os03g0296000 | -7.418877152   | 6.04E-11  | Os09g0371000  | 7.49218903     | 6.65E-09  | Os06g0632400 | -5.572879377   | 0.001325812 |
| Os03g0826900 | 5.083385735    | 9.69E-127   | Os03g0296100 | -7.4172203     | 9.42E-12  | Os09g0273950  | 7.465989639    | 7.95E-10  | Os01g0830900 | -5.554900798   | 0.001325812 |
| Os01g0584900 | 5.021795888    | 0.010933249 | Os10g0382100 | -7.399593898   | 2.25E-10  | Os08g0474000  | 7.449805706    | 1.43E-91  | Os02g0171100 | -5.454593976   | 0.002008    |
| Os02g0478450 | 5.009971559    | 0.010933249 | Os11g0623700 | -7.373033312   | 3.05E-10  | Os02g0158900  | 7.443855505    | 1.29E-09  | Os10g0340100 | -5.420509922   | 0           |
| Os01g0112600 | 4.974475915    | 1.29E-06    | Os10g0343500 | -7.316848903   | 1.49E-07  | Os11g0623700  | 7.358546158    | 1.44E-10  | Os01g0157700 | -5.412813826   | 0.002582482 |
| Os10g0112700 | 4.934351284    | 0.010933249 | Os03g0207475 | -7.234205904   | 2.55E-10  | Os01g0532300  | 7.231267265    | 5.97E-09  | Os04g0227500 | -5.38550403    | 0.002582482 |
| Os04g0688200 | 4.914486502    | 9.99E-06    | Os07g0278866 | -7.226929397   | 1.09E-09  | Os05g0494600  | 7.227304542    | 8.57E-134 | Os09g0409000 | -5.380340154   | 0.002582482 |
| Os12g0116700 | 4.871858872    | 0.016268697 | Os05g0417700 | -7.190160391   | 1.45E-10  | Os07g0278866  | 7.212226892    | 4.92E-10  | Os11g0100800 | -5.286295135   | 0.003651072 |
| Os02g0725900 | 4.859287897    | 0.016268697 | Os03g0108300 | -7.175789212   | 3.53E-10  | Os06g0723400  | 7.146508042    | 4.41E-07  | Os09g0477100 | -5.264796091   | 0.005216456 |
| Os01g0968800 | 4.858666707    | 0.016268697 | Os06g0723400 | -7.160006255   | 3.83E-07  | Os01g0822800  | 7.109542124    | 8.87E-275 | Os05g0463000 | -5.167486022   | 0.005216456 |
| Os03g0163150 | 4.8464145      | 0.016268697 | Os05g0468800 | -7.082335062   | 2.14E-08  | Os11g0678301  | 7.104711444    | 4.68E-30  | Os07g0178800 | -5.159062209   | 5.24E-27    |
| Os04g0203450 | 4.819614137    | 0.016268697 | Os02g0114300 | -7.056243436   | 1.33E-09  | Os07g06237050 | 7.062975647    | 1.13E-07  | Os01g0827300 | -5.15882344    | 0.005216456 |
| Os12g0226700 | 4.807082768    | 0.016268697 | Os07g0169700 | -6.995416952   | 2.25E-07  | Os07g0527800  | 7.010973633    | 9.45E-09  | Os10g0527800 | -5.115502348   | 0.007547617 |
| Os01g0154000 | 4.807082768    | 0.016268697 | Os11g0215300 | -6.978977463   | 4.76E-09  | Os01g0625300  | 6.986352023    | 4.11E-09  | Os12g0555000 | -5.110160636   | 0.007547617 |
| Os07g0516100 | 4.70656107     | 0.024477582 | Os03g0207800 | -6.946980195   | 1.52E-09  | Os07g0611700  | 6.935046602    | 3.91E-09  | Os11g0709000 | -5.031812477   | 0.011067148 |
| Os12g0276300 | 4.706235593    | 0.024477582 | Os04g0419400 | -6.921043896   | 8.44E-32  | Os01g0510901  | 6.919386464    | 3.70E-07  | Os08g0293300 | -5.025293189   | 6.46E-30    |
| Os04g0179700 | 4.705259259    | 0.024477582 | Os09g0499450 | -6.855246611   | 1.13E-08  | Os09g0525500  | 6.900803215    | 3.28E-22  | Os05g0425600 | -5.023021298   | 3.73E-07    |
| Os06g0730000 | 4.692030677    | 0.024477582 | Os03g0438400 | -6.797545583   | 5.09E-08  | Os01g0598900  | 6.875397661    | 1.78E-27  | Os11g0677400 | -5.005466414   | 0.011067148 |
| Os05g0201300 | 4.664974374    | 0.024477582 | Os04g0321500 | -6.789334669   | 7.26E-09  | Os05g0539300  | 6.850359713    | 1.03E-08  | Os04g0204000 | -4.992614328   | 0.011067148 |
| Os04g0572400 | 4.653158673    | 0.000137742 | Os11g0128932 | -6.761035776   | 8.87E-09  | Os09g0499450  | 6.842191389    | 3.49E-08  | Os10g0552700 | -4.980339947   | 0.011067148 |
| Os02g0630100 | 4.609815237    | 0.037383057 | Os04g0352400 | -6.749428031   | 0         | Os03g0438400  | 6.782429739    | 1.84E-07  | CAA33930     | -4.968653893   | 0.011067148 |
| Os04g0655700 | 4.587737693    | 0.000294242 | Os01g0602200 | -6.675806731   | 1.60E-06  | Os11g0128932  | 6.747987144    | 4.03E-08  | Os04g0598900 | -4.875862337   | 0.016383156 |
| Os11g0650500 | 4.578664054    | 2.83E-14    | Os07g0189400 | -6.662195445   | 5.90E-06  | Os11g0153851  | 6.742304981    | 2.11E-07  | Os01g0152100 | -4.875862337   | 0.016383156 |
| Os04g0524136 | 4.518742853    | 0.037383057 | Os10g0535800 | -6.62969726    | 7.25E-06  | Os10g0389500  | 6.717925009    | 0         | Os12g0528801 | -4.865592606   | 8.29E-299   |
| Os05g0369700 | 4.518742853    | 0.037383057 | Os05g0366200 | -6.625858233   | 9.91E-08  | Os06g0341300  | 6.683673126    | 7.67E-75  | Os11g0578000 | -4.863605991   | 0.016383156 |
| Os03g0144300 | 4.517548348    | 0.037383057 | Os09g0269400 | -6.603484422   | 1.43E-07  | Os01g0602200  | 6.661977085    | 3.02E-06  | Os03g0144300 | -4.847332298   | 0.016383156 |
| Os02g0713250 | 4.504104245    | 0.037383057 | Os08g0110600 | -6.602273911   | 2.53E-23  | Os08g0280150  | 6.649421846    | 4.95E-06  | Os07g0214600 | -4.844923383   | 0.016383156 |
| Os03g0274950 | 4.474916953    | 0.037383057 | Os04g0494600 | -6.593125297   | 1.17E-06  | Os09g0269400  | 6.588226122    | 3.66E-07  | Os08g0270400 | -4.83848539    | 0.016383156 |
| Os08g0160901 | 4.432941204    | 0.000486829 | Os01g0605700 | -6.583307915   | 1.40E-07  | Os02g0674233  | 6.556176557    | 1.89E-14  | Os08g0280300 | -4.835104338   | 0.016383156 |
| Os03g0277500 | 4.42960204     | 0.000599472 | Os02g0119000 | -6.531075117   | 4.34E-07  | Os03g0265900  | 6.488560154    | 1.09E-300 | Os04g0221800 | -4.81918639    | 0.016383156 |
| Os08g0416800 | 4.3966656      | 0.000599472 | Os12g0506700 | -6.50990983    | 9.47E-08  | Os12g0218500  | 6.44908742     | 8.48E-06  | Os06g0667000 | -4.806334118   | 0.016383156 |
| Os07g0405700 | 4.377398328    | 0.000681292 | Os08g0164000 | -6.506592683   | 1.38E-05  | Os01g0307686  | 6.435100513    | 5.47E-06  | Os02g0297132 | -4.806334118   | 0.016383156 |
| Os09g0467300 | 4.340466922    | 4.55E-06    | Os05g0407100 | -6.437863984   | 0         | Os07g0418500  | 6.415891215    | 2.33E-05  | Os08g0520600 | -4.801925815   | 0           |
| Os09g0469300 | 4.271448776    | 2.96E-05    | Os08g0529300 | -6.40498289    | 6.98E-07  | Os04g0529700  | 6.411217826    | 9.38E-06  | Os09g05525   |                |             |

|              |             |             |               |              |             |              |             |             |              |              |             |
|--------------|-------------|-------------|---------------|--------------|-------------|--------------|-------------|-------------|--------------|--------------|-------------|
| Os01g0640200 | 4.102764819 | 0.00114735  | Os01g0157200  | -6.331272893 | 3.46E-05    | Os04g0291000 | 6.322021315 | 2.43E-05    | Os07g0485500 | -4.719088487 | 0.024570936 |
| Os01g0208400 | 4.088278765 | 4.85E-06    | Os02g0576400  | -6.265343128 | 1.64E-06    | Os03g0275700 | 6.321232841 | 2.82E-05    | Os11g0175000 | -4.715870314 | 0.024570936 |
| Os05g0114700 | 4.071025361 | 0.00E+00    | Os01g0134850  | -6.256975218 | 1.61E-06    | Os01g0157200 | 6.317728207 | 3.69E-05    | Os01g0154000 | -4.709074861 | 0.024570936 |
| Os02g0585200 | 4.029385118 | 7.40E-05    | Os03g0282232  | -6.22404233  | 7.32E-06    | Os03g0128600 | 6.28043634  | 5.07E-06    | Os01g0329000 | -4.699070844 | 0.024570936 |
| Os03g0431600 | 4.011575436 | 0.00284999  | Os07g0248800  | -6.182355568 | 5.62E-05    | Os03g0282232 | 6.210652908 | 1.43E-05    | Os11g0126400 | -4.693379944 | 0.024570936 |
| Os03g0561283 | 3.948812999 | 3.06E-27    | Os01g0597400  | -6.165813111 | 7.24E-05    | Os01g0733200 | 6.207809093 | 8.08E-179   | Os06g0668400 | -4.693379944 | 0.024570936 |
| Os05g0500200 | 3.931559225 | 3.63E-160   | Os08g0236400  | -6.160591639 | 7.24E-05    | Os05g0399700 | 6.204748746 | 5.19E-16    | Os11g0107266 | -4.693379944 | 0.024570936 |
| Os11g0620500 | 3.922355942 | 0.000187034 | Os04g0512200  | -6.114655237 | 9.01E-06    | Os08g0236400 | 6.146390223 | 9.90E-05    | Os11g0619800 | -4.679093446 | 0.024570936 |
| Os03g0324900 | 3.893825724 | 3.67E-06    | Os11g0434400  | -6.112445721 | 3.16E-05    | Os04g0251825 | 6.09640766  | 6.60E-05    | Os10g0352200 | -4.675890313 | 0.024570936 |
| Os11g0686900 | 3.861574693 | 0.003385698 | Os04g0251825  | -6.111471263 | 2.77E-05    | Os12g0461300 | 6.08557743  | 7.44E-05    | Os10g0323900 | -4.672688646 | 0.024570936 |
| Os09g0417600 | 3.848502336 | 0.0067221   | Os04g0114801  | -6.082474371 | 1.82E-05    | Os11g0105901 | 6.08038162  | 7.87E-05    | Os05g0405400 | -4.655965083 | 0.024570936 |
| Os12g0150200 | 3.837133581 | 1.04E-09    | Os07g01129300 | -6.076710738 | 8.23E-06    | Os04g0114801 | 6.068911629 | 3.26E-05    | Os11g0582000 | -4.649210582 | 0.024570936 |
| Os10g0542100 | 3.818691667 | 0.0067221   | Os12g0557900  | -6.060475205 | 2.46E-05    | Os07g0129300 | 6.063028299 | 1.54E-05    | Os03g0637600 | -4.646020195 | 0.024570936 |
| Os01g0862800 | 3.809618043 | 0.005370919 | Os10g0102900  | -6.056287603 | 0.000121923 | Os12g0557900 | 6.045569968 | 4.43E-05    | Os06g0695400 | -4.639273565 | 0.037397889 |
| Os09g0545300 | 3.767887643 | 2.97E-06    | Os11g0430100  | -6.05579917  | 3.82E-05    | Os01g0762500 | 5.947209577 | 6.76E-17    | Os11g0572200 | -4.639273565 | 0.037397889 |
| Os10g0191300 | 3.767396312 | 0.007656627 | Os02g0105600  | -6.043146489 | 3.16E-05    | Os05g0576600 | 5.915735674 | 0.000291761 | Os11g0198200 | -4.639273565 | 0.037397889 |
| Os04g0516200 | 3.714973611 | 2.67E-22    | Os03g0731800  | -6.032531793 | 0.000159494 | Os03g0687700 | 5.905099021 | 0.000194374 | Os10g0514300 | -4.639273565 | 0.037397889 |
| Os11g0406945 | 3.69704954  | 0.001721472 | Os04g0573100  | -6.016460071 | 1.56E-50    | Os11g0451700 | 5.861338381 | 9.91E-34    | Os11g0471200 | -4.604263899 | 2.46E-74    |
| Os01g0955100 | 3.68942721  | 7.39E-06    | Os11g0467632  | -6.003349011 | 0.000159494 | Os10g0142600 | 5.860524153 | 0.000185697 | Os04g0362501 | -4.597696999 | 2.67E-15    |
| Os01g0620400 | 3.683846826 | 0.000466194 | Os01g0170000  | -6.000499141 | 5.17E-05    | Os07g0183200 | 5.857445091 | 0.000388803 | Os10g0485400 | -4.597117845 | 1.85E-07    |
| Os08g0518800 | 3.674400564 | 5.62E-22    | Os08g0491700  | -5.991050129 | 8.01E-15    | Os04g0596200 | 5.857445091 | 0.000388803 | Os09g0417600 | -4.589552878 | 0.000313667 |
| Os01g0597600 | 3.644754987 | 6.96E-05    | Os06g0611400  | -5.966767431 | 0.000210933 | Os04g0604500 | 5.846076121 | 8.75E-05    | Os12g0169600 | -4.531537707 | 0.037397889 |
| CAA33960     | 3.638830942 | 0.012309471 | Os02g0796000  | -5.959088824 | 2.96E-05    | Os08g0415600 | 5.841305021 | 2.71E-38    | Os05g0588500 | -4.514638715 | 0.037397889 |
| Os11g0151400 | 3.636274972 | 9.44E-31    | Os12g0607800  | -5.934015065 | 6.11E-05    | Os04g0326300 | 5.811317084 | 3.73E-20    | Os07g0561101 | -4.514225658 | 0.037397889 |
| Os04g0630800 | 3.633601929 | 1.60E-07    | Os03g0341600  | -5.926047123 | 0.000279791 | Os05g0498200 | 5.7960527   | 0.0001504   | Os01g0849600 | -4.507892907 | 0.037397889 |
| Os03g0817500 | 3.604767913 | 0.00076647  | Os08g0496800  | -5.924269841 | 6.35E-11    | Os03g0623100 | 5.778537018 | 0.00014568  | Os01g0652300 | -4.49359581  | 0.037397889 |
| Os08g0487100 | 3.596946001 | 8.35E-31    | Os03g0687700  | -5.918409283 | 0.000120832 | Os11g0457500 | 5.77615229  | 0.000268136 | Os02g0138100 | -4.493180769 | 0.037397889 |
| Os02g0759400 | 3.59324043  | 6.68E-22    | Os07g0687300  | -5.910982883 | 0.000279791 | Os07g0242900 | 5.773362686 | 0.000522083 | Os01g0369900 | -4.493180769 | 0.037397889 |
| Os01g0656300 | 3.572080361 | 0.016839942 | Os07g0138400  | -5.901529778 | 0.000279791 | Os06g0139200 | 5.769203192 | 0.000186578 | Os06g0702000 | -4.486457784 | 0.037397889 |
| Os01g0554150 | 3.553202188 | 1.67E-44    | Os01g0903100  | -5.874904344 | 0.000165837 | Os11g0656100 | 5.740431507 | 0.000522083 | Os03g0141100 | -4.482683463 | 0.037397889 |
| Os04g0655300 | 3.534623664 | 0.003436587 | Os07g0183200  | -5.871815287 | 0.000279791 | Os06g0199000 | 5.73528961  | 0.000246591 | Os05g0475600 | -4.471866114 | 6.73E-37    |
| Os04g0604800 | 3.526749957 | 0.016839942 | Os04g0596200  | -5.871815287 | 0.000279791 | Os03g0676400 | 5.734094643 | 0.00034611  | BAC19854     | -4.4163799   | 0.000634691 |
| Os12g0123700 | 3.520423987 | 1.32E-160   | Os04g0604500  | -5.859589134 | 3.58E-05    | Os05g0451200 | 5.728947052 | 0.000192378 | Os11g0282700 | -4.362409222 | 1.71E-32    |
| Os09g0109600 | 3.504176457 | 2.04E-171   | Os03g0182800  | -5.814719674 | 8.03E-12    | Os05g0350900 | 5.727197326 | 0.000498513 | Os07g0178700 | -4.287543212 | 1.70E-95    |
| Os05g0355400 | 3.502062302 | 1.95E-86    | Os10g0488300  | -5.811680314 | 0.000286857 | Os12g0511600 | 5.725980338 | 0.000522083 | Os08g0129400 | -4.282555305 | 0.001336629 |
| Os07g0669500 | 3.500751813 | 0.000161386 | Os05g0498200  | -5.808675009 | 9.45E-05    | Os03g0353300 | 5.722796805 | 0.000522083 | Os04g0552400 | -4.17577583  | 2.84E-08    |
| Os06g0579100 | 3.487863061 | 0.014744383 | Os03g0836800  | -5.806798089 | 0.00037405  | Os07g0489800 | 5.716195757 | 1.36E-133   | Os03g0176500 | -4.166934718 | 0.002260355 |
| Os03g0826800 | 3.486486432 | 0           | Os01g0813700  | -5.805702515 | 0.000129133 | Os11g0235700 | 5.696948994 | 9.51E-257   | Os10g0159300 | -4.146226591 | 2.18E-299   |
| Os03g0133100 | 3.484963081 | 1.42E-41    | Os04g0420033  | -5.794197814 | 0.000283218 | Os10g0510200 | 5.669005423 | 0.000707285 | Os10g0191300 | -4.016774803 | 0.003906703 |
| Os02g0528000 | 3.478768177 | 2.12E-13    | Os07g0242900  | -5.787739866 | 0.000503526 | Os01g0887850 | 5.662832842 | 0.000270589 | Os04g0448300 | -4.006968101 | 0.003906703 |
| Os12g0113600 | 3.469980389 | 0.023223602 | Os06g0139200  | -5.784261906 | 0.000121116 | Os10g0345600 | 5.660444549 | 0.000392618 | Os11g0506800 | -4.001980277 | 7.06E-100   |
| Os11g0170900 | 3.453107513 | 3.18E-59    | Os12g0556500  | -5.741340607 | 0.00021364  | Os09g0365450 | 5.656060128 | 0.000247571 | Os01g0202800 | -3.945464922 | 6.21E-06    |
| Os01g0111600 | 3.443297661 | 0.023223602 | Os02g0155600  | -5.739187254 | 0.000119239 | Os03g0176300 | 5.655197065 | 0.000305187 | CAA33979     | -3.94418356  | 0.005178058 |
| Os07g0422100 | 3.438030525 | 6.58E-19    | Os03g0353300  | -5.737435247 | 0.000503526 | Os05g0537700 | 5.654245894 | 0.000392478 | Os01g0936700 | -3.906312329 | 0.005178058 |
| Os01g0910500 | 3.417775548 | 0.005548252 | Os02g0540000  | -5.718233412 | 0.000221594 | Os06g0572000 | 5.640471033 | 3.70E-11    | Os01g0869750 | -3.858215481 | 4.77E-05    |
| Os05g0342100 | 3.396539324 | 0.023223602 | Os03g0688000  | -5.708737124 | 4.17E-39    | Os03g0841850 | 5.592768383 | 0.00042635  | Os06g0592500 | -3.84382996  | 0           |
| Os01g0652450 | 3.385397641 | 0.023223602 | Os10g0510200  | -5.683479315 | 0.000683399 | Os06g0170100 | 5.59073968  | 0.00041649  | Os03g0299700 | -3.840212714 | 3.45E-159   |
| Os08g0556900 | 3.383060654 | 0.00045887  | Os11g0257800  | -5.67217657  | 0.000683399 | Os11g0488900 | 5.587120189 | 1.51E-08    | Os01g0136000 | -3.777919202 | 1.94E-20    |
| Os04g0693200 | 3.352606488 | 0.022968002 | Os01g0114800  | -5.669511965 | 6.17E-10    | Os04g0231266 | 5.581247464 | 0.000963896 | Os07g0631200 | -3.773138953 | 2.14E-165   |
| Os03g0283850 | 3.352437687 | 0.026618047 | Os05g0537700  | -5.667835182 | 0.000263257 | Os01g0644200 | 5.5788854   | 0.000963896 | Os02g0185400 | -3.746616946 | 0.009303597 |
| Os02g0533800 | 3.347669297 | 9.94E-261   | Os12g0539400  | -5.664628689 | 0.00017958  | Os04g0581100 | 5.5788854   | 0.000963896 | Os09g0347300 | -3.742466856 | 2.09E-14    |
| Os12g0428000 | 3.314428557 | 2.88E-38    | Os02g0758000  | -5.662052585 | 4.05E-238   | Os02g0683800 | 5.568798566 | 9.28E-12    | Os06g0594600 | -3.721205712 | 0.009303597 |
| Os11g0241700 | 3.310956348 | 5.82E-06    | Os11g0512000  | -5.648167735 | 0.000683399 | Os03g0642900 | 5.563683615 | 0.001325812 | Os12g0624400 | -3.720723865 | 0.012596076 |
| Os12g0198900 | 3.280164702 | 0.045038631 | Os06g0653300  | -5.612217034 | 0.000936281 | Os12g0638300 | 5.561173355 | 0.000963896 | Os12g0641300 | -3.712172188 | 0.006507505 |
| Os12g0571600 | 3.265193081 | 4.24E-05    | Os06g0170100  | -5.604061741 | 0.000284674 | Os03g0750000 | 5.551867656 | 3.51E-09    | Os02g0782500 | -3.703346349 | 3.13E-114   |
| Os06g0559400 | 3.246630001 | 2.48E-09    | Os08g0277200  | -5.599464195 | 0.00024995  | Os12g0228800 | 5.546720305 | 0.001325812 | Os11g0491500 | -3.677561425 | 0.000305564 |
| Os02g0671100 | 3.23945703  | 2.56E-142   | Os02g0750800  | -5.596491022 | 0.00035778  | Os05g0162800 | 5.526444825 | 0.000923031 | Os07g0122100 | -3.633500267 | 0.012596076 |
| Os09g0464066 | 3.237894182 | 3.57E-06    | Os12g0105150  | -5.562506341 | 0.000936281 | Os01g0890100 | 5.526319389 | 0.001325812 | Os06g0594300 | -3.631589658 | 0.012596076 |
| Os08g0559501 | 3.237722665 | 0.040699743 | Os04g0116800  | -5.553732065 | 0.001292693 | Os08g0163900 | 5.52267579  | 0.001325812 | Os08g0211750 | -3.621011806 | 0.012687646 |
| Os01g0186900 | 3.225397035 | 7.00E-15    | Os02g0517900  | -5.54970468  | 0.001237739 | Os03g0344400 | 5.517954724 | 0.000611874 | Os06g0270982 | -3.620663089 | 0.012596076 |
| Os04g0155200 | 3.21873275  | 3.07E-06    | Os10g0114300  | -5.546984499 | 6.31E-20    | Os03g0830950 | 5.51692349  | 0.000605283 | Os03g0269300 | -3.614324895 | 0.000161795 |
| Os01g0749000 | 3.213997785 | 0.05038631  | Os08g0163900  | -5.535768943 | 0.001075786 | Os06g0687200 | 5.511804493 | 0.00057221  | Os07g0102500 | -3.605112561 | 0.016268369 |
| Os06g0306500 | 3.212090439 | 7.19E-06    | Os03g0344400  | -5.531149324 | 0.000430087 | Os01g0304400 | 5.510589013 | 0.001325812 | Os06g0543601 | -3.566349084 | 4.66E-05    |
| Os08g0412700 | 3.209160585 | 4.43E-05    | Os06g0687200  | -5.525666276 | 0.000401484 | Os12g0172400 | 5.506900161 | 0.001325812 | Os06g0197575 | -3.539273686 | 2.02E-13    |
| Os06g0688800 | 3.201367818 | 0.005274991 | Os06g0150600  | -5.501279929 | 0.001020895 | Os08g0508500 | 5.485891295 | 0           | Os11g0195800 | -3.535885858 | 1.68E-13    |
| Os01g019613  |             |             |               |              |             |              |             |             |              |              |             |

|              |             |                       |              |              |             |              |             |             |              |              |             |
|--------------|-------------|-----------------------|--------------|--------------|-------------|--------------|-------------|-------------|--------------|--------------|-------------|
| Os03g0830400 | 3.115166277 | 0.00017895            | Os11g0558200 | -5.442731779 | 0.000787231 | Os12g0211100 | 5.432639546 | 2.71E-10    | Os04g0568700 | -3.449970423 | 1.10E-61    |
| Os09g0357400 | 3.113153742 | 3.61E-06              | Os02g0792500 | -5.430810142 | 0.001795979 | Os02g0140800 | 5.428937004 | 0.001471546 | Os03g0103200 | -3.41690284  | 0.023599586 |
| Os05g0526700 | 3.105374404 | 0.000203344           | Os01g0895000 | -5.413146363 | 0.001795979 | Os12g0187800 | 5.420037039 | 5.88E-11    | Os02g0301700 | -3.402369259 | 0.023599586 |
| Os04g0437000 | 3.095736931 | 1.96E-08              | Os06g0311800 | -5.40550441  | 0.001795979 | Os12g0457500 | 5.396081024 | 5.19E-51    | Os01g0108400 | -3.396764871 | 0.032592904 |
| Os10g0505900 | 3.094458194 | 2.28E-10              | Os08g0404500 | -5.404326892 | 0.001795979 | Os08g0404500 | 5.391137766 | 0.001843654 | Os05g0538700 | -3.37612752  | 0.032592904 |
| Os09g0554300 | 3.091006248 | 4.58E-58              | Os10g0374450 | -5.398627281 | 0.001795979 | Os08g0153000 | 5.389846395 | 0.001843654 | Os03g0850900 | -3.371600957 | 0.002260355 |
| Os07g0257800 | 3.085498178 | 5.45E-06              | Os10g0490100 | -5.397474531 | 0.002523717 | Os02g0534000 | 5.382072406 | 0.002582482 | Os05g0220500 | -3.365086039 | 7.75E-13    |
| Os02g0606200 | 3.083464206 | 0                     | BAC19888     | -5.39549583  | 0.001795979 | Os05g0419050 | 5.380818353 | 0.002582482 | Os06g0195800 | -3.363909907 | 1.51E-114   |
| Os01g0975300 | 3.079253701 | 1.94496723019329e-316 | Os12g0626200 | -5.360652611 | 0.002523717 | Os12g0635400 | 5.347569274 | 1.54E-07    | Os11g0323860 | -3.355156198 | 0.002260355 |
| Os01g0687150 | 3.076395159 | 7.89E-05              | Os07g0523150 | -5.360261061 | 0.002307637 | Os01g0971800 | 5.345127359 | 2.98E-95    | Os07g0557400 | -3.352830238 | 0.0073967   |
| Os12g0552600 | 3.058679218 | 4.51E-07              | Os11g0173432 | -5.360259349 | 0.002309208 | Os09g0400000 | 5.332901825 | 0.002582482 | Os01g0703300 | -3.29407295  | 1.65E-06    |
| Os02g0463500 | 3.053577062 | 2.08E-13              | Os08g0197700 | -5.359248704 | 0.001273379 | Os04g0331650 | 5.329415994 | 2.62E-09    | Os03g0113200 | -3.277519058 | 0.045339093 |
| Os01g0264000 | 3.015002819 | 1.70E-51              | Os09g0400000 | -5.347471966 | 0.002321447 | Os03g0111300 | 5.323830361 | 0.002582482 | Os03g0276500 | -3.244283298 | 0           |
| Os11g0493000 | 2.993783938 | 9.08E-05              | Os05g0484000 | -5.336340818 | 0.002523717 | Os06g0534900 | 5.304634969 | 9.99E-16    | Os09g0330700 | -3.238963427 | 2.45E-06    |
| Os09g0522100 | 2.993761196 | 1.28E-09              | Os02g0120100 | -5.32371982  | 0.002523717 | Os04g0634900 | 5.30425811  | 0.002582482 | Os06g0687100 | -3.229818273 | 0.045339093 |
| Os11g0239900 | 2.982976705 | 4.66E-40              | Os08g0335600 | -5.321901101 | 0.002523717 | Os04g0206300 | 5.30815865  | 0.002582482 | Os03g0800000 | -3.226605555 | 0.045339093 |
| Os06g0251100 | 2.975101893 | 0.026302894           | Os08g0433350 | -5.321284661 | 0.002523717 | Os02g0780536 | 5.29445405  | 0.002582482 | Os01g0631800 | -3.222943311 | 0.045339093 |
| Os02g0783700 | 2.970111462 | 0.026302894           | Os03g0745000 | -5.320096792 | 0           | Os06g0284500 | 5.290443463 | 0.003651072 | Os05g0562300 | -3.220702439 | 0           |
| Os07g0618000 | 2.969096685 | 0.026302894           | Os09g0501100 | -5.307861574 | 0.002523717 | Os10g0488850 | 5.28763618  | 4.55E-09    | Os05g0450300 | -3.210772    | 0.003906703 |
| Os03g0138200 | 2.954386324 | 9.56E-06              | Os01g0138500 | -5.289086304 | 1.04E-172   | Os12g0238550 | 5.281611318 | 0.002871218 | Os10g0340301 | -3.208206768 | 0.045339093 |
| Os03g0305600 | 2.951612677 | 1.10E-51              | Os07g0154100 | -5.28833954  | 0.001815426 | Os02g0160800 | 5.277044876 | 0.003651072 | Os11g0169700 | -3.193031172 | 0.045339093 |
| Os10g0516900 | 2.933433094 | 4.59E-149             | Os04g0310800 | -5.280811198 | 0.002289522 | Os07g0154100 | 5.275044415 | 0.002405326 | Os01g0227500 | -3.180247903 | 0.000336578 |
| Os08g0437050 | 2.930148152 | 0.019755991           | Os12g0178300 | -5.264402959 | 0.003587571 | Os06g0206900 | 5.268870105 | 3.65E-08    | Os05g0109100 | -3.173160919 | 2.28E-05    |
| Os03g0734500 | 2.928894459 | 0.001914563           | Os12g0210601 | -5.261689231 | 0.002827721 | Os12g0633650 | 5.250180554 | 0.003651072 | Os01g0214500 | -3.162648524 | 0.000412769 |
| Os01g0793900 | 2.914722668 | 1.20E-06              | Os03g0641250 | -5.245345457 | 0.003587571 | Os02g0459150 | 5.238059006 | 0.003651072 | Os03g0273200 | -3.151510281 | 0.00069079  |
| Os06g0698748 | 2.913340737 | 9.31E-99              | Os01g0596500 | -5.236849242 | 0.003587571 | Os04g0623550 | 5.220005615 | 1.29E-07    | Os05g0296800 | -3.138884458 | 2.61E-21    |
| Os08g0157600 | 2.893250467 | 0                     | Os06g0145300 | -5.209530816 | 0.002742939 | Os07g0115500 | 5.21515857  | 0.003651072 | Os06g0360500 | -3.118017458 | 0.000268005 |
| Os03g0738600 | 2.889154868 | 1.15E-15              | Os01g0598900 | -5.199201618 | 1.30E-26    | Os04g0464100 | 5.180392929 | 0.005216456 | Os04g0352400 | -3.113637031 | 0           |
| Os01g0281100 | 2.882055299 | 4.36E-286             | Os01g0596600 | -5.190564712 | 0.002908994 | Os05g0148800 | 5.179003292 | 0.005216456 | Os01g0136100 | -3.099686054 | 4.60E-09    |
| Os01g0674400 | 2.873693725 | 5.90E-46              | Os02g0323300 | -5.185929283 | 7.01E-07    | Os03g0680300 | 5.170643124 | 0.005216456 | Os07g0538200 | -3.09699328  | 0.001379557 |
| Os02g0735150 | 2.859235837 | 0.000650232           | Os07g0606400 | -5.177219294 | 0.005131585 | Os07g0650100 | 5.166062915 | 5.92E-07    | Os03g0826300 | -3.090851877 | 0.00161931  |
| Os11g0701800 | 2.856482279 | 1.56E-32              | Os01g0660000 | -5.175334101 | 0.00384212  | Os07g0606400 | 5.163667177 | 0.005216456 | Os07g0153150 | -3.0870188   | 6.03E-88    |
| Os08g0547300 | 2.85586672  | 0                     | Os05g0404901 | -5.167526563 | 2.33E-20    | Os11g0664500 | 5.148306124 | 0.005216456 | Os12g0439201 | -3.079475917 | 0.020609353 |
| Os09g0379600 | 2.845976969 | 0.001855191           | Os07g0675200 | -5.163877336 | 0.005131585 | Os07g0628900 | 5.128737261 | 0.005216456 | Os06g0253100 | -3.05786362  | 5.58E-87    |
| Os01g0850700 | 2.845466405 | 0.002291136           | Os11g0664500 | -5.161938063 | 0.005131585 | Os04g0204100 | 5.114767983 | 0.005216456 | Os06g0183200 | -3.053582226 | 0.0069112   |
| Os11g0153100 | 2.838587426 | 3.67E-114             | Os08g0298901 | -5.144098188 | 0.005131585 | Os11g0494100 | 5.104654978 | 1.71E-10    | Os06g0728700 | -3.050013055 | 0           |
| Os09g0394600 | 2.837420253 | 1.31E-44              | Os01g0114600 | -5.143048878 | 2.99E-49    | Os11g0568666 | 5.096036828 | 0.005216456 | Os04g0578550 | -3.030772177 | 2.45E-139   |
| Os07g0130400 | 2.832099965 | 0.009790565           | Os03g0336100 | -5.13366208  | 0.005131585 | Os01g0150700 | 5.092589293 | 0.004456048 | Os05g0375400 | -3.005026488 | 1.30E-06    |
| Os03g0570775 | 2.814742223 | 0.000565718           | Os02g0564600 | -5.120484553 | 0.005131585 | Os04g0171800 | 5.090339663 | 1.44E-08    | Os10g0155100 | -2.980448891 | 2.72E-41    |
| Os08g0518900 | 2.810574458 | 4.32E-16              | Os11g0134100 | -5.115949632 | 0.005131585 | Os05g0145650 | 5.087363692 | 0.007547617 | Os03g0355200 | -2.980410997 | 2.33E-05    |
| Os07g0185000 | 2.805529735 | 1.58E-07              | Os01g0753400 | -5.113331056 | 0.005131585 | Os03g0371300 | 5.080124648 | 0.007547617 | Os09g0240200 | -2.975389742 | 8.08E-09    |
| Os09g0482300 | 2.786780611 | 0.045204942           | Os10g0497700 | -5.110536271 | 0.004386421 | Os09g0509400 | 5.077486829 | 0.006518088 | Os05g0279900 | -2.942953769 | 8.08E-25    |
| Os06g0561100 | 2.783177964 | 0.004387981           | Os01g0150700 | -5.105215051 | 0.003427985 | Os03g0216800 | 5.076348295 | 0.005995062 | Os11g0104866 | -2.941960691 | 0.000340518 |
| Os03g0820400 | 2.768515763 | 1.80E-05              | Os01g0532600 | -5.100132624 | 0.005131585 | Os05g0530350 | 5.072880669 | 0.007547617 | Os01g0533400 | -2.932129563 | 0.035327368 |
| Os11g0606900 | 2.767903926 | 0.000457766           | Os04g0571600 | -5.096730358 | 0.003023622 | Os06g0673800 | 5.069997698 | 0.007547617 | Os06g0510200 | -2.91851419  | 2.77E-25    |
| Os07g0130800 | 2.767214744 | 0.045936167           | Os09g0116000 | -5.095629272 | 0.003500871 | Os04g0511200 | 5.067553203 | 0.006928464 | Os01g0559750 | -2.91711062  | 0           |
| Os05g0105800 | 2.753845643 | 9.06E-111             | Os04g0528200 | -5.095256079 | 2.49E-22    | Os12g0591300 | 5.062706331 | 0.007547617 | Os03g0157000 | -2.912794918 | 0.035327368 |
| Os05g0578100 | 2.747563481 | 0.009148251           | Os03g0216800 | -5.090773845 | 0.004773484 | Os01g0733801 | 5.05400725  | 0.007547617 | Os05g0563300 | -2.907867121 | 1.35E-20    |
| Os04g0532500 | 2.743095557 | 0.002062479           | Os03g0114400 | -5.08947445  | 0.005096094 | Os11g0278300 | 5.046746372 | 0.007547617 | Os01g0947000 | -2.879420427 | 7.55E-21    |
| Os04g0249500 | 2.738543434 | 0.002146075           | Os01g0733801 | -5.067726576 | 0.00744999  | Os05g0468800 | 5.04475298  | 6.67E-07    | Os01g0274601 | -2.864643606 | 0.000169962 |
| Os01g0719125 | 2.737184759 | 7.50E-06              | Os06g0293500 | -5.059134318 | 0.00744999  | Os07g0159550 | 5.042088485 | 4.89E-14    | Os09g0132200 | -2.853222576 | 0.035327368 |
| Os06g0730950 | 2.735218238 | 0.045936167           | Os01g0170051 | -5.052266604 | 5.99E-10    | Os07g0293000 | 5.016167096 | 0.007547617 | Os10g0107000 | -2.816503063 | 0.003035347 |
| Os10g0537450 | 2.733208348 | 0.023223602           | Os04g0596900 | -5.032614045 | 0.00744999  | Os01g0138500 | 5.013292224 | 5.03E-169   | Os07g0267300 | -2.797843568 | 3.21E-215   |
| Os02g0809500 | 2.72333018  | 1.82E-26              | Os07g0582700 | -5.028540011 | 0.00744999  | Os01g0642801 | 5.001178254 | 0.007547617 | Os02g0178100 | -2.796482186 | 0.00127617  |
| Os01g0159800 | 2.710271168 | 1.50E-109             | Os12g0249900 | -5.025076626 | 0.00744999  | Os11g0133200 | 4.995201785 | 0.007547617 | Os08g0489300 | -2.778773943 | 0.000571405 |
| Os02g0178100 | 2.704613597 | 0.007085801           | Os06g0475400 | -5.025076626 | 0.00744999  | Os11g0618500 | 4.995145309 | 0.007547617 | Os03g0229551 | -2.778521485 | 0.046503528 |
| Os04g0686800 | 2.701635191 | 0.00230924            | BAC19864     | -5.019642573 | 0.00744999  | Os11g0620450 | 4.989166742 | 0.007547617 | Os03g0817500 | -2.769651183 | 0.017167161 |
| Os08g0412800 | 2.696169014 | 0.046121235           | Os04g0213100 | -5.0140673   | 0.00744999  | Os12g0126050 | 4.989109022 | 0.007547617 | Os10g0557900 | -2.761459857 | 0.001603738 |
| Os05g0560900 | 2.688763223 | 4.29E-42              | Os11g0618500 | -5.007425727 | 0.006161655 | Os10g0329400 | 4.98571961  | 0.006501281 | Os07g0600000 | -2.755503663 | 9.75E-09    |
| Os03g0188100 | 2.687760133 | 0.000352817           | Os02g0188400 | -5.002440055 | 0.00744999  | Os08g0542500 | 4.975754036 | 0.006671329 | Os06g0559600 | -2.749613411 | 6.18E-14    |
| Os03g0403400 | 2.684265177 | 6.26E-12              | Os10g0329400 | -4.998620235 | 0.005096094 | Os03g0619875 | 4.974034766 | 0.007547617 | Os01g0101900 | -2.741617202 | 0.046674011 |
| Os06g0287000 | 2.683897717 | 0.000446515           | Os01g0633500 | -4.994887096 | 0.00744999  | Os04g0432400 | 4.972538686 | 0.011067148 | Os05g0460000 | -2.740153676 | 0           |
| Os04g0208200 | 2.680968328 | 0.003510635           | Os08g0542500 | -4.989931524 | 0.005219745 | Os08g0121900 | 4.959008873 | 0.011067148 | Os01g0131250 | -2.732721113 | 0.040310214 |
| Os03g0752400 | 2.677107824 | 0.004024379           | Os04g0432400 | -4.985970382 | 0.00744999  | Os04g0583200 | 4.954015693 | 1.89E-198   | Os01g0281100 | -2.710121494 | 9.59E-247   |
| Os06g0335975 | 2.65746025  | 6.16E-68              | Os12g0232700 | -4.984495667 | 0.00537596  | Os05g0143550 | 4.9         |             |              |              |             |

|              |             |             |              |              |             |              |             |             |              |              |             |
|--------------|-------------|-------------|--------------|--------------|-------------|--------------|-------------|-------------|--------------|--------------|-------------|
| Os03g0624300 | 2.604941564 | 7.45E-12    | Os11g0616700 | -4.918746187 | 0.010933249 | Os08g0430050 | 4.903691608 | 0.011067148 | Os01g0864100 | -2.670442345 | 0.009225698 |
| Os04g0533900 | 2.594506309 | 4.27E-33    | Os08g0430050 | -4.916533759 | 0.010933249 | Os03g0151000 | 4.900662612 | 0.011067148 | Os02g0829850 | -2.666999144 | 2.08E-06    |
| Os02g0682300 | 2.591698049 | 0.00014535  | Os06g0121800 | -4.914509167 | 0.010933249 | Os03g0814800 | 4.899030025 | 0.011067148 | Os06g0155400 | -2.653687571 | 8.65E-11    |
| Os06g0606100 | 2.589585002 | 2.48E-08    | Os04g0115200 | -4.913708501 | 0.010933249 | Os12g0618000 | 4.896893777 | 8.63E-12    | Os11g0659200 | -2.653538889 | 0.011034878 |
| Os11g0114600 | 2.585441259 | 8.89E-59    | Os03g0814800 | -4.912295893 | 0.010933249 | Os08g0161100 | 4.89436833  | 0.011067148 | BAC19890     | -2.646456441 | 0.000716717 |
| Os04g0640600 | 2.580158563 | 1.02E-85    | Os08g0161100 | -4.908058169 | 0.010933249 | Os02g0210700 | 4.888152646 | 0.011067148 | Os03g0291200 | -2.637491136 | 0.015855223 |
| Os11g0307300 | 2.573378174 | 4.59E-24    | Os01g0365000 | -4.903820623 | 0.010933249 | Os01g0222900 | 4.888073699 | 1.35E-07    | Os03g0805600 | -2.625264921 | 5.84E-93    |
| Os03g0764100 | 2.571303839 | 9.69E-13    | Os03g0155300 | -4.901232905 | 2.26E-08    | Os03g0646032 | 4.88496275  | 0.011067148 | Os01g0208400 | -2.617347628 | 0.009022899 |
| Os06g0728700 | 2.566498139 | 0           | Os11g0495400 | -4.89595407  | 0.010933249 | Os10g0580400 | 4.883326089 | 0.011067148 | Os03g0133850 | -2.61086102  | 0.005071543 |
| Os10g0205700 | 2.564859079 | 0.004475359 | Os06g0163900 | -4.892517346 | 0.008931492 | Os01g0746000 | 4.880216948 | 0.011067148 | Os12g0603300 | -2.610854143 | 2.28E-15    |
| Os02g0568700 | 2.559249752 | 0.044942034 | Os04g0423100 | -4.890104689 | 0.010933249 | Os01g0250200 | 4.877107845 | 0.011067148 | Os07g0541400 | -2.609531938 | 0.000170512 |
| Os06g0129900 | 2.547236892 | 8.95E-144   | Os08g0508500 | -4.889398778 | 0           | Os04g0423100 | 4.877024078 | 0.011067148 | Os02g0185200 | -2.6003192   | 0.008821603 |
| Os10g0525000 | 2.544422586 | 2.16E-16    | Os02g0257100 | -4.879578834 | 0.008218985 | Os07g0620700 | 4.873914367 | 0.011067148 | Os02g0758000 | -2.590431192 | 0           |
| Os07g0585700 | 2.542182438 | 4.97E-12    | Os01g0974600 | -4.874178061 | 0.009665535 | Os12g0129650 | 4.872316551 | 0.010880249 | Os01g0691100 | -2.589805205 | 0.011496733 |
| Os01g0686300 | 2.542149589 | 0.000943618 | Os01g0142950 | -4.874175695 | 0.009671102 | Os11g0493100 | 4.871360205 | 8.07E-07    | Os07g0599600 | -2.584373519 | 0.020609353 |
| Os09g0286600 | 2.54011614  | 1.25E-282   | Os11g0246300 | -4.872340994 | 0.010933249 | Os10g0558100 | 4.869223633 | 0.010725711 | Os03g0740200 | -2.581074182 | 1.82E-120   |
| Os05g0527900 | 2.532217027 | 0.008865919 | Os05g0527600 | -4.872340994 | 0.010933249 | Os03g0102775 | 4.861576145 | 0.010325643 | Os09g0125400 | -2.57986038  | 0.008821603 |
| Os04g0423200 | 2.523535612 | 0.006064866 | Os05g0142600 | -4.871531029 | 0.010933249 | Os11g0246300 | 4.85827934  | 0.011067148 | Os09g0526600 | -2.578934955 | 8.61E-264   |
| Os07g0148200 | 2.521976431 | 0.000297793 | Os07g0550900 | -4.870117963 | 0.010933249 | Os05g0527600 | 4.85827934  | 0.011067148 | Os08g0546800 | -2.578715649 | 7.39E-211   |
| Os02g0574500 | 2.520922201 | 2.20E-180   | Os11g0534300 | -4.866572037 | 0.009916176 | Os05g0142600 | 4.858191546 | 0.011067148 | Os10g0560400 | -2.566116649 | 4.68E-07    |
| Os02g0725500 | 2.518308432 | 0.019692466 | Os11g0577300 | -4.8630535   | 0.010933249 | Os07g0411250 | 4.855081135 | 0.011067148 | Os02g0814300 | -2.560026385 | 9.09E-08    |
| Os12g0231000 | 2.513233288 | 2.01E-24    | Os06g0314600 | -4.8630535   | 0.010933249 | Os03g0110700 | 4.850415812 | 0.011067148 | Os02g0620600 | -2.557053624 | 2.01E-07    |
| Os01g0943000 | 2.494629973 | 0.000328561 | Os01g0199300 | -4.857370054 | 1.19E-08    | Os03g0743800 | 4.847842753 | 1.25E-08    | Os08g0360400 | -2.555737974 | 0.001536916 |
| Os09g0246500 | 2.493808401 | 3.92E-226   | Os07g0251500 | -4.85659009  | 0.010933249 | Os02g0639300 | 4.84681856  | 6.64E-07    | Os08g0513051 | -2.550900709 | 0.013808343 |
| Os11g0112050 | 2.491817973 | 0.005114376 | Os10g0528300 | -4.852950935 | 0.010933249 | Os09g0428600 | 4.833464343 | 2.42E-06    | Os02g0814000 | -2.543385005 | 0           |
| Os09g0411900 | 2.483238077 | 8.26E-05    | Os01g0330200 | -4.823256968 | 9.08E-09    | Os09g0325700 | 4.813562276 | 2.48E-141   | Os03g0701100 | -2.542486962 | 0           |
| Os12g0118850 | 2.475676012 | 0.000790792 | Os11g0573800 | -4.812810759 | 9.74E-08    | Os09g0408300 | 4.811392177 | 1.12E-06    | Os05g0586600 | -2.513013861 | 3.46E-38    |
| Os03g0315400 | 2.471512539 | 4.17E-06    | Os03g0266900 | -4.801361094 | 1.00E-120   | Os12g0106500 | 4.785109326 | 0.016383156 | Os02g0759400 | -2.512683262 | 4.06E-05    |
| Os05g0130400 | 2.464485895 | 0.000101144 | Os11g0300800 | -4.795308158 | 0.016268697 | Os01g0168000 | 4.785109326 | 0.016383156 | Os01g0371200 | -2.506742395 | 6.14E-12    |
| Os02g0232000 | 2.460016979 | 9.46E-31    | Os02g0475101 | -4.794447576 | 0.016268697 | Os03g0184100 | 4.780370105 | 0           | Os08g0566600 | -2.502654616 | 2.36E-71    |
| Os08g0501000 | 2.457379235 | 3.19E-15    | Os08g0297800 | -4.792976227 | 0.016268697 | Os09g0518750 | 4.780002486 | 2.72E-06    | Os03g0851700 | -2.501061448 | 1.45E-109   |
| Os09g0531701 | 2.453868085 | 0.002915333 | Os11g0593100 | -4.792976227 | 0.016268697 | Os01g0744700 | 4.775283465 | 0.016383156 | Os11g0269900 | -2.496074019 | 0.004318014 |
| Os11g0435300 | 2.419279674 | 0.018640581 | Os01g0744700 | -4.788562653 | 0.016268697 | Os10g0134800 | 4.775283465 | 0.016383156 | Os08g0157600 | -2.491169302 | 0           |
| Os04g0612000 | 2.41739192  | 0.045676889 | Os10g0134800 | -4.788562653 | 0.016268697 | Os01g0307624 | 4.772044586 | 0.016383156 | Os04g0638800 | -2.48880164  | 0.045339093 |
| Os05g0194900 | 2.401256875 | 0.023638835 | Os08g0244750 | -4.787953616 | 0.016268697 | Os08g0551366 | 4.767973676 | 6.10E-11    | Os04g0116600 | -2.487183812 | 0.017957794 |
| Os07g0664600 | 2.399718721 | 0.001069624 | Os05g0237400 | -4.78328692  | 0.016268697 | Os10g0516350 | 4.767075135 | 0.016383156 | Os01g0919900 | -2.484954211 | 0           |
| Os12g0114100 | 2.397421739 | 2.55E-24    | Os11g0567800 | -4.78328692  | 0.016268697 | Os07g0169500 | 4.762104193 | 0.016383156 | Os12g0156100 | -2.48056837  | 0.000116698 |
| Os02g0198500 | 2.39699791  | 3.96E-06    | Os07g0116600 | -4.768254775 | 0.013680913 | Os01g0652200 | 4.757245709 | 0.016383156 | Os04g0538000 | -2.472448691 | 3.52E-97    |
| Os02g0649300 | 2.396814996 | 3.89E-35    | Os07g0462500 | -4.765377745 | 0.016268697 | Os03g0296200 | 4.755452271 | 0           | Os02g0729400 | -2.469063069 | 5.83E-276   |
| Os05g0109100 | 2.394829274 | 0.004390746 | Os12g0631600 | -4.759802661 | 4.20E-27    | Os04g0321500 | 4.74958771  | 1.66E-06    | Os01g0840100 | -2.456426604 | 0           |
| Os03g0634400 | 2.385906172 | 4.25E-08    | Os10g0202500 | -4.754217735 | 0.016268697 | Os02g0209300 | 4.74915143  | 1.95E-10    | Os04g0387300 | -2.448384877 | 2.77E-104   |
| Os01g0693700 | 2.381227348 | 0.004313378 | Os09g0255200 | -4.748338556 | 0.016268697 | Os10g0202501 | 4.740821946 | 0.016383156 | Os06g0264700 | -2.448025177 | 1.19E-27    |
| Os07g0407300 | 2.371829352 | 0.001342727 | Os10g0112500 | -4.748338556 | 0.016268697 | Os09g0255200 | 4.73434653  | 0.016383156 | Os09g0346500 | -2.444981906 | 6.56E-286   |
| Os03g0406900 | 2.365281476 | 0.000355783 | Os02g0793800 | -4.745998657 | 0.016268697 | Os08g0109150 | 4.73434653  | 0.016383156 | Os01g0206700 | -2.442174465 | 0.023198946 |
| Os04g0119000 | 2.364463768 | 0.006487625 | Os01g0626400 | -4.743059555 | 0.016268697 | Os02g0793800 | 4.732608674 | 0.016383156 | Os03g0245800 | -2.438023832 | 9.62E-30    |
| Os03g0106550 | 2.344265111 | 1.05E-78    | Os10g0191900 | -4.740120972 | 0.016268697 | Os01g0618300 | 4.730989877 | 0.016383156 | Os06g0253350 | -2.427469198 | 0.015880923 |
| Os02g0756200 | 2.339208792 | 2.74E-25    | Os12g0594700 | -4.733372661 | 0.016268697 | Os01g0121900 | 4.727556622 | 1.50E-06    | Os03g0113700 | -2.424887487 | 4.26E-232   |
| Os01g0971400 | 2.336603965 | 3.92E-06    | Os08g0186200 | -4.730435219 | 0.016268697 | Os01g0682001 | 4.723531062 | 1.76E-59    | Os09g0491756 | -2.408756799 | 0           |
| Os06g0604300 | 2.332150136 | 2.85E-17    | Os01g0697700 | -4.730435219 | 0.016268697 | Os07g0407300 | 4.716303582 | 0.016383156 | Os12g0548401 | -2.408187052 | 1.61E-09    |
| Os04g0586500 | 2.326675579 | 1.51E-05    | Os04g0231800 | -4.726359715 | 5.05E-06    | Os01g0697700 | 4.716303582 | 0.016383156 | Os06g0294200 | -2.405781013 | 2.32E-06    |
| Os04g0143566 | 2.322363736 | 0.022775625 | Os02g0197750 | -4.723969334 | 1.64E-06    | Os02g0523650 | 4.712944447 | 0.016383156 | Os03g0237500 | -2.394640706 | 4.09E-48    |
| Os08g0560000 | 2.315883239 | 1.97E-07    | Os01g0893400 | -4.72387071  | 0           | Os12g0431100 | 4.709708795 | 0.024570936 | Os01g0706800 | -2.39272794  | 0.035327368 |
| Os11g0590900 | 2.313384474 | 0.013098492 | Os06g0479400 | -4.722219354 | 0.016268697 | Os04g0223500 | 4.69381151  | 6.88E-56    | Os04g0535600 | -2.391587947 | 0.00647382  |
| Os04g0593400 | 2.310945611 | 0.000136879 | Os01g0384901 | -4.716939956 | 0.016268697 | Os02g0674400 | 4.677312123 | 8.07E-15    | Os05g0531000 | -2.390365406 | 2.30E-06    |
| Os02g0125350 | 2.306468467 | 0.007409877 | Os11g0231200 | -4.686913323 | 2.01E-10    | Os04g0392500 | 4.655147418 | 7.85E-05    | Os03g0775000 | -2.385809387 | 8.20E-28    |
| Os03g0180900 | 2.303872945 | 8.26E-11    | Os01g0245700 | -4.67106852  | 2.40E-07    | Os09g0555550 | 4.651504097 | 5.68E-07    | Os09g0518000 | -2.366104226 | 0.017009256 |
| Os06g0220000 | 2.303637484 | 3.14E-28    | Os06g0142400 | -4.669251437 | 3.44E-141   | Os06g0559400 | 4.650481998 | 0.024570936 | Os02g0687900 | -2.356315309 | 9.05E-74    |
| Os03g0638200 | 2.295375925 | 4.13E-186   | Os11g0147600 | -4.666693355 | 0.024477582 | Os10g0163130 | 4.650481998 | 0.024570936 | Os07g0440900 | -2.355242371 | 1.84E-05    |
| Os12g0238900 | 2.288313415 | 0.001433751 | Os06g0199700 | -4.663623007 | 0.024477582 | Os05g0142900 | 4.647099944 | 0.024570936 | Os01g0842400 | -2.351220023 | 8.84E-09    |
| Os10g0547500 | 2.286713525 | 4.40E-06    | Os12g0537000 | -4.660553285 | 0.024477582 | Os08g0113501 | 4.645264204 | 0.024570936 | Os06g0196550 | -2.349488888 | 1.41E-09    |
| Os06g0220900 | 2.284617735 | 0.000801969 | Os02g0599400 | -4.658089169 | 0.024477582 | Os07g0132800 | 4.645089857 | 2.48E-08    | Os02g0259900 | -2.336896557 | 1.45E-277   |
| Os02g0161900 | 2.283029176 | 0           | Os12g0409800 | -4.651951283 | 0.024477582 | Os07g0287800 | 4.640337743 | 0.024570936 | Os10g0550900 | -2.33017101  | 1.00E-13    |
| Os03g0133850 | 2.282430171 | 0.008967127 | Os03g0132900 | -4.65003177  | 3.15E-10    | Os05g0517600 | 4.640337743 | 0.024570936 | Os01g0971400 | -2.328629201 | 0.000743229 |
| Os06g0218000 | 2.281952333 | 0.035227485 | Os01g0388700 | -4.64888335  | 0.024477582 | Os12g0409800 | 4.638501138 | 0.024570936 | Os01g0727840 | -2.32549278  | 0.029148371 |
| Os04g0353600 | 2.277718265 | 0.00961964  | Os01g0146200 | -4.647951945 | 0.024477582 | Os01g0388700 | 4.635120609 | 0.024570936 | Os06g0720400 | -2.324086542 | 4           |

|              |             |             |              |              |             |              |             |             |              |              |             |
|--------------|-------------|-------------|--------------|--------------|-------------|--------------|-------------|-------------|--------------|--------------|-------------|
| Os04g0386700 | 2.253098363 | 8.37E-93    | Os09g0484900 | -4.626206179 | 0.023310583 | Os02g0655750 | 4.616086094 | 0.024570936 | Os07g0287400 | -2.300366419 | 7.01E-266   |
| Os11g0508600 | 2.250767166 | 0.034953395 | Os06g0524700 | -4.623290492 | 0.023094681 | Os07g0189400 | 4.615682777 | 5.79E-05    | Os09g0110300 | -2.294720082 | 0.023790683 |
| Os04g0630600 | 2.248921266 | 0.014577231 | Os02g0288700 | -4.619090893 | 0.024477582 | Os07g0448600 | 4.614397024 | 0.024570936 | Os05g0407100 | -2.294075695 | 0           |
| Os10g0163130 | 2.247724563 | 0.010933249 | Os03g0588800 | -4.617559452 | 0.024477582 | Os03g0389100 | 4.607642783 | 0.024570936 | Os06g0682900 | -2.283737449 | 1.27E-301   |
| Os03g0334300 | 2.24443361  | 2.06E-11    | Os10g0349900 | -4.60896706  | 0.024477582 | Os07g0117350 | 4.607642783 | 0.024570936 | Os04g0490866 | -2.278605308 | 0.002035626 |
| Os01g0392600 | 2.24389564  | 1.01E-117   | Os04g0644000 | -4.605906489 | 0.024477582 | Os02g0288700 | 4.605800857 | 0.024570936 | Os04g0208200 | -2.275226996 | 0.02940141  |
| Os01g0386500 | 2.235245722 | 0.005177897 | Os11g0691800 | -4.604376533 | 0.024477582 | Os12g0518200 | 4.604807663 | 1.84E-08    | Os01g0235500 | -2.27150372  | 0.003088674 |
| Os03g0153900 | 2.231103317 | 0.000185417 | Os04g0665900 | -4.603829324 | 5.32E-05    | Os03g0588800 | 4.604112658 | 0.024570936 | Os02g0574500 | -2.267348539 | 2.12E-141   |
| Os04g0625850 | 2.228621587 | 0.023544269 | Os01g0238375 | -4.587206113 | 0.024477582 | Os01g0872100 | 4.604112658 | 0.024570936 | Os09g0444800 | -2.267129427 | 7.73E-06    |
| Os07g0649600 | 2.219236629 | 9.22E-11    | Os11g0182900 | -4.587206113 | 0.024477582 | Os01g0603200 | 4.600736909 | 0.024570936 | Os10g0478300 | -2.26641063  | 0.045160945 |
| Os03g0388900 | 2.216578202 | 2.01E-06    | Os04g0194433 | -4.585678271 | 0.024477582 | Os06g0328966 | 4.600736909 | 0.024570936 | Os02g0479700 | -2.253445733 | 0.035944088 |
| Os03g0750000 | 2.214085048 | 2.71E-12    | Os09g0471200 | -4.578626142 | 0.024477582 | Os04g0329650 | 4.600736909 | 0.024570936 | Os04g0547600 | -2.250280278 | 0.046619234 |
| Os02g0685200 | 2.213726167 | 1.61E-68    | Os06g0535200 | -4.570983582 | 1.40E-05    | Os03g0415750 | 4.599049363 | 0.024570936 | Os03g0852800 | -2.242194664 | 0.029148371 |
| Os05g0549800 | 2.208932699 | 4.81E-10    | Os08g0201700 | -4.568524322 | 0.024477582 | Os10g0349900 | 4.595518751 | 0.024570936 | Os01g0775100 | -2.237580658 | 1.62E-232   |
| Os07g0469200 | 2.208298148 | 8.85E-149   | Os02g0491300 | -4.5624646   | 5.00E-142   | Os11g0691800 | 4.59045771  | 0.024570936 | Os06g0271300 | -2.234753704 | 0.018427144 |
| Os03g0570800 | 2.207043333 | 1.10E-05    | Os02g0674233 | -4.558865624 | 7.45E-12    | Os03g0820400 | 4.59045771  | 0.024570936 | Os01g0387566 | -2.230454341 | 6.42E-11    |
| Os05g0192100 | 2.206733961 | 0.006838502 | Os08g0299801 | -4.548615793 | 4.39E-10    | Os11g0113150 | 4.584320442 | 6.07E-05    | Os03g0123500 | -2.226837503 | 0.011880521 |
| Os12g0101800 | 2.198632024 | 0.000504408 | Os06g0299200 | -4.542260416 | 2.03E-06    | Os02g0773450 | 4.581868129 | 0.024570936 | Os01g0866100 | -2.226410112 | 1.58E-277   |
| Os06g0335900 | 2.196915831 | 7.67E-82    | Os06g0652300 | -4.536577984 | 6.94E-07    | Os11g0454300 | 4.579415118 | 3.87E-63    | Os03g0267000 | -2.222211223 | 4.37E-56    |
| Os09g0369400 | 2.194882076 | 7.31E-36    | Os11g0151700 | -4.521835379 | 0.024477582 | Os01g0775750 | 4.574966    | 0.024570936 | Os03g0133800 | -2.218159157 | 9.24E-09    |
| Os07g0287400 | 2.191124204 | 1.24E-211   | Os09g0433900 | -4.511201075 | 0.037383057 | Os05g0550700 | 4.574966    | 0.024570936 | Os03g0149300 | -2.210350224 | 0.040336966 |
| Os04g0568800 | 2.183912871 | 1.37E-102   | Os03g0645900 | -4.5096095   | 8.39E-58    | Os01g0238375 | 4.573280921 | 0.024570936 | Os09g0438100 | -2.209781587 | 0.002378847 |
| Os12g0171500 | 2.183060621 | 1.20E-36    | Os05g0509101 | -4.509597253 | 0.037383057 | Os03g0586500 | 4.563758423 | 4.46E-136   | Os11g0599100 | -2.193188684 | 0.012932098 |
| Os05g0488600 | 2.18226309  | 2.72E-06    | Os02g0292800 | -4.5079937   | 0.037383057 | Os04g0115700 | 4.561005692 | 3.80E-16    | Os03g0100200 | -2.192658946 | 9.57E-116   |
| Os05g0586600 | 2.181669513 | 2.71E-36    | Os10g0577500 | -4.507398238 | 0.037383057 | Os02g0157200 | 4.555264826 | 1.81E-18    | Os04g0612500 | -2.186779393 | 6.76E-91    |
| Os11g0102200 | 2.174353755 | 5.16E-05    | Os07g0489000 | -4.507398238 | 0.037383057 | Os08g0201700 | 4.554431972 | 0.024570936 | Os04g0234600 | -2.178883463 | 5.44E-23    |
| Os09g0396900 | 2.173624576 | 1.26E-161   | Os07g0232450 | -4.50639042  | 0.037383057 | Os07g0629500 | 4.548440425 | 1.55E-05    | Os03g0850700 | -2.173734181 | 1.17E-81    |
| Os01g0343300 | 2.165814872 | 0.004457605 | Os01g0695900 | -4.501582227 | 0.037383057 | Os05g0406150 | 4.545635105 | 1.14E-07    | Os03g0656075 | -2.164146535 | 8.12E-06    |
| Os05g0163900 | 2.165232612 | 1.94E-06    | Os11g0298200 | -4.499980052 | 0.037383057 | Os05g0142200 | 4.54467931  | 6.08E-18    | Os10g0205700 | -2.163422169 | 0.02948069  |
| Os01g0303300 | 2.163256376 | 0.024477582 | Os01g0657000 | -4.495767072 | 0.037383057 | Os01g0687300 | 4.540076666 | 4.55E-277   | Os09g0531701 | -2.161291111 | 0.030797779 |
| Os01g0854500 | 2.162408623 | 0.00385928  | Os10g0474000 | -4.494052612 | 2.99E-19    | Os04g0443801 | 4.532182823 | 1.18E-08    | Os11g0521500 | -2.158164093 | 8.85E-186   |
| Os09g0547500 | 2.156061713 | 6.40E-56    | Os08g0121400 | -4.488213716 | 2.70E-10    | Os01g0871800 | 4.527279605 | 7.95E-06    | Os03g0387900 | -2.156814838 | 0           |
| Os04g0382550 | 2.155409858 | 0.034953395 | Os06g0635300 | -4.483978639 | 3.57E-26    | Os01g0508100 | 4.515046644 | 7.87E-09    | Os10g0528400 | -2.156267076 | 0.000536426 |
| Os02g0586900 | 2.154218907 | 3.42E-70    | Os07g0604100 | -4.481951491 | 0.037383057 | Os06g0178500 | 4.510274687 | 8.65E-05    | Os06g0682666 | -2.154186871 | 1.99E-21    |
| Os11g0303600 | 2.154028718 | 0.024774286 | Os11g0244200 | -4.477740817 | 0.037383057 | Os02g0578400 | 4.50766375  | 3.79E-09    | Os02g0284800 | -2.154024072 | 1.67E-85    |
| Os01g0844300 | 2.153517877 | 5.36E-96    | Os03g0808900 | -4.474696322 | 0.036626198 | Os02g0466400 | 4.498551805 | 0.037397889 | Os02g0485000 | -2.149672758 | 6.58E-17    |
| Os05g0103400 | 2.149975232 | 0.000161918 | Os01g0721200 | -4.472944867 | 0.037383057 | Os05g0509101 | 4.496782959 | 0.037397889 | Os01g0831250 | -2.142777547 | 0.000294037 |
| Os11g0505300 | 2.146868564 | 2.12E-24    | Os02g0207500 | -4.472944867 | 0.037383057 | Os09g0357250 | 4.494082677 | 6.88E-09    | Os08g0101800 | -2.142601102 | 0.020242753 |
| Os04g0568850 | 2.144100882 | 1.39E-35    | Os09g0256650 | -4.471346839 | 0.037383057 | Os07g0489000 | 4.493434681 | 0.037397889 | Os01g0842500 | -2.128592555 | 4.57E-05    |
| Os04g0565500 | 2.134829483 | 2.37E-14    | Os06g0627400 | -4.471346839 | 0.037383057 | Os07g0232450 | 4.493246134 | 0.037397889 | Os04g0444050 | -2.120960581 | 0.017082654 |
| Os07g0147550 | 2.129254897 | 0.001863501 | Os02g0310500 | -4.465103389 | 4.28E-06    | Os09g0550500 | 4.491582538 | 1.68E-19    | Os03g0308800 | -2.119783672 | 0           |
| Os01g0740300 | 2.128664418 | 1.37E-12    | Os11g0676500 | -4.463943803 | 0.037383057 | Os07g0575700 | 4.491478159 | 0.037397889 | Os01g0180800 | -2.118353501 | 0           |
| Os02g0156600 | 2.123929878 | 0.020837515 | Os05g0570200 | -4.462347183 | 0.037383057 | Os02g0175200 | 4.491478159 | 0.037397889 | Os10g0461400 | -2.116677752 | 0.003259081 |
| Os02g0771600 | 2.119517252 | 3.44E-225   | Os01g0645650 | -4.462347183 | 0.037383057 | Os01g0695900 | 4.487943098 | 0.037397889 | Os03g0266900 | -2.115183925 | 1.39E-206   |
| Os09g0482660 | 2.114495529 | 1.93E-12    | Os03g0215700 | -4.462347183 | 0.037383057 | Os05g0324700 | 4.486547247 | 7.23E-20    | Os11g0208800 | -2.109188059 | 0.018328243 |
| Os01g0594650 | 2.114442594 | 0.043327181 | Os01g0144800 | -4.462020857 | 3.45E-09    | Os11g0298200 | 4.486176017 | 0.037397889 | Os12g0152750 | -2.101210758 | 4.86E-44    |
| Os11g0556132 | 2.114301222 | 4.65E-41    | Os03g0791200 | -4.45813994  | 0.037383057 | Os08g0496100 | 4.485985791 | 0.037397889 | Os03g0100010 | -2.099028248 | 4.30E-07    |
| Os04g0175900 | 2.114029877 | 9.47E-16    | Os01g0946800 | -4.444366081 | 0.037383057 | Os04g0616282 | 4.484409239 | 0.037397889 | Os03g0266300 | -2.093385447 | 1.34E-294   |
| Os02g0623300 | 2.107247821 | 2.77E-17    | Os03g0721700 | -4.439474217 | 0.000121027 | Os04g0563050 | 4.484218617 | 0.037397889 | Os02g0606200 | -2.092412056 | 7.71E-179   |
| Os05g0381900 | 2.107140699 | 0.000269821 | Os05g0546500 | -4.430131064 | 2.48E-07    | Os11g0671100 | 4.478954588 | 9.81E-66    | Os10g0330400 | -2.086821017 | 6.58E-12    |
| Os01g0274601 | 2.106580739 | 0.020506163 | Os07g0418500 | -4.427266971 | 0.000146909 | Os03g0322900 | 4.477579795 | 3.42E-43    | Os10g0567800 | -2.08364521  | 8.26E-34    |
| Os08g0536200 | 2.104610544 | 1.42E-11    | Os11g0422000 | -4.416496822 | 7.44E-05    | Os09g0509700 | 4.468481883 | 1.02E-90    | Os03g0197300 | -2.082634939 | 9.82E-05    |
| Os06g0203200 | 2.104550191 | 3.36E-36    | Os10g0148100 | -4.406265585 | 4.54E-44    | Os06g0532101 | 4.466174721 | 0.037397889 | Os07g0567801 | -2.066116897 | 0.012354709 |
| Os09g0248900 | 2.103527595 | 1.52E-09    | Os10g0149100 | -4.403711177 | 0.000187034 | Os07g0687900 | 4.462816658 | 5.81E-90    | Os03g0170900 | -2.06566871  | 1.78E-38    |
| Os01g0222001 | 2.100520593 | 2.15E-72    | Os11g0644900 | -4.386254269 | 1.29E-08    | Os03g0808900 | 4.460882361 | 0.037397889 | Os10g0178500 | -2.064526163 | 0.047645663 |
| Os02g0206700 | 2.091290077 | 3.24E-06    | Os03g0174400 | -4.378512786 | 0.000187034 | Os01g0721200 | 4.459118916 | 0.037397889 | Os11g0530600 | -2.063125848 | 0.021596344 |
| Os09g0482681 | 2.084672678 | 0.000894719 | Os01g0778400 | -4.357317293 | 0.037383057 | Os03g0325000 | 4.459118916 | 0.037397889 | Os04g0479900 | -2.06280675  | 1.23E-248   |
| Os06g0728200 | 2.082011438 | 0.000109755 | Os05g0104750 | -4.357317293 | 0.037383057 | Os02g0797300 | 4.459118916 | 0.037397889 | Os04g0625850 | -2.061829893 | 0.046455478 |
| Os07g0201300 | 2.081889551 | 0.00019865  | Os06g0192300 | -4.355636233 | 0.037383057 | Os09g0561000 | 4.459118916 | 0.037397889 | Os01g0774500 | -2.059810194 | 0.028030754 |
| Os05g0268500 | 2.071489599 | 0.036115766 | Os03g0730400 | -4.353955565 | 0.037383057 | Os06g0627400 | 4.457355813 | 0.037397889 | Os07g0148200 | -2.059400968 | 0.00926509  |
| Os01g0923000 | 2.042433974 | 2.80E-77    | Os03g0296200 | -4.353120357 | 0           | Os09g0259200 | 4.453633089 | 0.037397889 | Os08g0543000 | -2.054014699 | 0.014082119 |
| Os09g0412700 | 2.039950334 | 2.68E-05    | Os11g0679700 | -4.345939232 | 2.59E-23    | Os05g0125400 | 4.450182382 | 3.50E-16    | Os01g0933500 | -2.050117032 | 1.03E-96    |
| Os03g0176700 | 2.039770487 | 3.39E-51    | Os10g0569500 | -4.32149882  | 0.000125979 | Os08g0281500 | 4.448346794 | 0.037397889 | Os03g0780600 | -2.048620305 | 1.63E-287   |
| Os03g0348500 | 2.036845865 | 3.06E-09    | Os03g0687400 | -4.321441667 | 4.88E-05    | Os08g0100200 | 4.446542953 | 4.07E-46    | Os12g0480300 | -2.044887821 | 0.013310855 |
| Os07g0222200 | 2.035995343 | 0.024061666 | Os08g0565900 | -4.313539509 | 5.65E-05    | Os03g0791200 | 4.444624804 | 0.037397889 | Os04g0524300 | -2.037771151 | 7.32E-09    |
| Os04g0451000 | 2.028455    |             |              |              |             |              |             |             |              |              |             |

|              |             |             |              |              |             |              |             |             |              |              |             |
|--------------|-------------|-------------|--------------|--------------|-------------|--------------|-------------|-------------|--------------|--------------|-------------|
| Os03g0183300 | 2.00755277  | 0           | Os11g0176000 | -4.259206613 | 2.43E-12    | Os11g0591300 | 4.412363819 | 0.037397889 | Os10g0116800 | -2.016322054 | 0.001947631 |
| Os09g0484800 | 2.002761784 | 4.00E-19    | Os06g0693600 | -4.256828889 | 0.000177073 | Os01g0678800 | 4.412363819 | 0.037397889 | Os05g0519700 | -2.012937187 | 2.44E-244   |
| Os04g0607150 | 2.002683786 | 7.80E-06    | Os04g0534600 | -4.252551933 | 8.74E-05    | Os04g0301500 | 4.41093824  | 1.07E-32    | Os07g0523600 | -2.01261905  | 0.009798831 |
| Os07g0541400 | 2.000794295 | 0.021205231 | Os07g0249900 | -4.237921702 | 2.62E-09    | Os01g0203400 | 4.401587824 | 8.84E-06    | Os03g0592500 | -2.012284668 | 2.89E-248   |
| Os01g0256500 | 1.997969112 | 1.58E-87    | Os11g0706801 | -4.23409487  | 1.56E-08    | Os01g0144380 | 4.394818395 | 1.44E-14    | Os02g0514712 | -2.002655654 | 0.001169309 |
| Os01g0221100 | 1.996811783 | 3.29E-44    | Os08g0415600 | -4.229328477 | 9.61E-25    | Os03g0366525 | 4.390783091 | 0.000161965 | Os01g0594300 | -2.002357548 | 0.007725651 |
| Os05g0435800 | 1.995412836 | 0.024011257 | Os06g0325602 | -4.22268309  | 7.20E-18    | Os02g0307050 | 4.371356682 | 4.87E-05    | Os02g0528900 | -2.00031079  | 9.66E-06    |
| Os05g0425700 | 1.994761567 | 0           | Os09g0445600 | -4.21005293  | 1.05E-99    | Os10g0556500 | 4.366668175 | 6.82E-14    | Os04g0644400 | -1.999429413 | 2.10E-224   |
| Os02g0235600 | 1.994615917 | 0.000217401 | Os03g0372900 | -4.205845471 | 9.40E-08    | Os06g0288100 | 4.365503121 | 0.000244974 | Os02g0129800 | -1.99898382  | 1.29E-50    |
| Os01g0720700 | 1.99270149  | 2.92E-68    | Os02g0329933 | -4.19089188  | 2.26E-07    | Os01g0532700 | 4.350995536 | 1.68E-12    | Os06g0231600 | -1.994833049 | 0.026295488 |
| Os09g0467400 | 1.992649607 | 6.47E-12    | Os09g0125766 | -4.176043785 | 0.000422756 | Os05g0464300 | 4.34939561  | 2.92E-08    | Os11g0233201 | -1.987678039 | 7.99E-06    |
| Os08g0221300 | 1.990848831 | 0.001413844 | Os04g0326300 | -4.171868139 | 1.08E-14    | Os01g0778400 | 4.344881445 | 0.037397889 | Os12g0190200 | -1.986422019 | 8.93E-31    |
| Os02g0218600 | 1.990845172 | 0.010002911 | Os01g0625300 | -4.169602065 | 5.10E-07    | Os02g0245301 | 4.344881445 | 0.037397889 | Os05g0268500 | -1.98580794  | 0.047919225 |
| Os01g0603300 | 1.989437914 | 4.98E-155   | Os07g0516400 | -4.168407032 | 4.51E-14    | Os05g0104750 | 4.344881445 | 0.037397889 | Os04g0635000 | -1.985745046 | 0.000166366 |
| Os09g0240200 | 1.987359466 | 0.000678071 | Os03g0398250 | -4.165372703 | 3.63E-08    | Os04g0415800 | 4.333060355 | 6.73E-07    | Os09g0494500 | -1.979553621 | 4.71E-29    |
| Os10g0461400 | 1.982307893 | 0.004127987 | Os02g0513976 | -4.163155557 | 1.30E-16    | Os03g0351300 | 4.323038124 | 3.15E-260   | Os03g0131200 | -1.979356652 | 1.31E-28    |
| Os05g0552800 | 1.979486891 | 0.000922236 | Os06g0253100 | -4.140164358 | 8.66E-25    | Os04g0407850 | 4.315160286 | 9.06E-05    | Os05g0279850 | -1.97437818  | 8.43E-15    |
| Os12g0630200 | 1.976094039 | 0.030987034 | Os11g0105350 | -4.130807335 | 9.58E-11    | Os10g0569500 | 4.307936727 | 0.00020734  | Os08g0444440 | -1.972352497 | 3.37E-68    |
| Os05g0130100 | 1.970501626 | 2.37E-18    | Os07g0687900 | -4.122879864 | 9.96E-97    | Os12g0121150 | 4.300025358 | 1.27E-10    | Os10g0159167 | -1.969153307 | 7.21E-08    |
| Os08g0472800 | 1.969918655 | 1.69E-204   | Os07g0209600 | -4.118307865 | 0.000380795 | Os04g0677600 | 4.298569111 | 1.23E-71    | Os03g0156600 | -1.968504471 | 3.23E-05    |
| Os06g0514700 | 1.96762026  | 0.000107442 | Os01g0578200 | -4.104916724 | 0.000417546 | Os09g0473800 | 4.294925234 | 2.22E-06    | Os07g0573900 | -1.965717053 | 2.04E-30    |
| Os01g0665750 | 1.965066665 | 0.010634341 | Os06g0640201 | -4.10025114  | 0.000240812 | Os02g0767800 | 4.273269395 | 2.19E-06    | Os03g0100100 | -1.964994928 | 0.002321854 |
| Os03g0564200 | 1.959894093 | 7.59E-05    | Os04g0618400 | -4.095369772 | 0.00076647  | Os01g0699400 | 4.262890461 | 1.17E-10    | Os10g0536700 | -1.960826772 | 2.49E-22    |
| Os04g0612500 | 1.959524084 | 2.91E-82    | Os09g0538000 | -4.065748359 | 2.34E-112   | Os04g0611700 | 4.24713953  | 1.09E-21    | Os11g0595200 | -1.960299782 | 1.86E-66    |
| Os02g0513700 | 1.955608355 | 0.037008467 | Os05g0165200 | -4.062212495 | 0.000711785 | Os01g0694100 | 4.241829475 | 4.85E-27    | Os11g0594500 | -1.959389207 | 7.20E-06    |
| Os01g0268000 | 1.952765582 | 0.001493489 | Os01g0877400 | -4.057397258 | 2.41E-22    | Os06g0652100 | 4.241051248 | 9.13E-10    | Os04g0445100 | -1.956848075 | 8.09E-07    |
| Os11g0265100 | 1.952650014 | 0.003437778 | Os10g0578600 | -4.048602101 | 0.00036527  | Os11g0151400 | 4.225051215 | 3.25E-05    | Os03g0650200 | -1.952987103 | 7.26E-11    |
| Os12g0614050 | 1.947017566 | 0.048823302 | Os05g0539300 | -4.041410468 | 8.28E-07    | Os05g0165900 | 4.21622314  | 1.68E-71    | Os03g0381300 | -1.940795769 | 0           |
| Os08g0368777 | 1.944137028 | 1.07E-108   | Os10g0135100 | -4.040053826 | 0.000602811 | Os01g0387865 | 4.195344799 | 2.53E-06    | Os11g0490300 | -1.935389599 | 1.47E-60    |
| Os03g0192700 | 1.943613808 | 1.38E-173   | Os06g0592500 | -4.027097521 | 1.63E-107   | Os07g0612200 | 4.18367858  | 2.63E-08    | Os06g0231300 | -1.930708102 | 0           |
| Os06g0295300 | 1.943013509 | 0.022582946 | Os02g0779650 | -4.024203482 | 9.10E-09    | Os11g0549401 | 4.178389567 | 4.04E-53    | Os02g0102900 | -1.921483656 | 3.39E-222   |
| Os10g0477600 | 1.941892795 | 0.000686535 | Os06g0317100 | -4.008867613 | 0.000850086 | Os06g0666400 | 4.170342427 | 1.41E-16    | Os06g0239100 | -1.920270174 | 6.37E-05    |
| Os10g0107600 | 1.940052581 | 6.41E-63    | Os11g0272300 | -4.001524669 | 1.36E-07    | Os06g0575000 | 4.169587799 | 3.81E-16    | Os02g0662000 | -1.920108637 | 0.012376564 |
| Os04g0604200 | 1.939186182 | 0.005230572 | Os11g0103550 | -3.978441192 | 0.00098739  | Os05g0107801 | 4.156946989 | 9.65E-06    | Os02g0610500 | -1.91698491  | 3.16E-175   |
| Os11g0212900 | 1.939175997 | 2.84E-10    | Os10g0162100 | -3.975440332 | 6.00E-126   | Os09g0268600 | 4.142815623 | 0.000499197 | Os08g0391700 | -1.916251796 | 0.001299945 |
| Os09g0103300 | 1.938263447 | 0.003817021 | Os05g0235450 | -3.965662369 | 8.06E-07    | Os10g0483400 | 4.128227249 | 0.000133104 | Os06g0229000 | -1.912415138 | 0.008679074 |
| Os05g0463300 | 1.93327703  | 0.001248542 | Os01g0102400 | -3.957344497 | 0.000163105 | Os11g0512600 | 4.122208646 | 0.000634691 | Os02g0697500 | -1.911404984 | 7.30E-07    |
| Os02g0499300 | 1.931123121 | 8.69E-34    | Os03g0298100 | -3.957343056 | 0.000163009 | Os10g0430750 | 4.101688671 | 0.000372874 | Os02g0197200 | -1.901506797 | 0.000212325 |
| Os04g0167300 | 1.922292659 | 0.03848493  | Os01g0962300 | -3.954740927 | 0.001277134 | Os01g0930400 | 4.093433985 | 0.00022186  | Os02g0125600 | -1.899763529 | 1.61E-28    |
| Os10g0360800 | 1.916863197 | 0.004070803 | Os10g0424400 | -3.954540125 | 1.13E-06    | Os07g0209600 | 4.091453559 | 0.000644877 | Os12g0626400 | -1.899475665 | 5.55E-47    |
| Os02g0829850 | 1.915857088 | 0.00054703  | Os05g0189300 | -3.946015524 | 1.28E-41    | Os12g0614851 | 4.083191312 | 4.53E-06    | Os09g0464000 | -1.895656157 | 2.95E-06    |
| Os01g0607600 | 1.903275983 | 1.09E-08    | Os05g0576600 | -3.927375039 | 0.001277134 | Os10g0528100 | 4.077526708 | 0.00102324  | Os02g0622500 | -1.894892306 | 1.18E-286   |
| Os11g0115400 | 1.902397346 | 6.78E-29    | Os06g0535100 | -3.927176478 | 2.80E-12    | Os09g0489800 | 4.073370654 | 1.65E-08    | Os09g0482660 | -1.894364058 | 9.73E-11    |
| Os01g0775100 | 1.900596469 | 2.04E-156   | Os12g0161500 | -3.926897721 | 0.000581245 | Os03g0679700 | 4.072224128 | 0           | Os03g0439700 | -1.892890683 | 9.24E-17    |
| Os12g0226400 | 1.899220496 | 1.04E-06    | Os10g0546900 | -3.892784196 | 0.001659959 | Os11g0154900 | 4.071579916 | 6.39E-20    | Os07g0623600 | -1.889708618 | 3.09E-134   |
| Os04g0493600 | 1.898238311 | 4.18E-08    | Os03g0654700 | -3.889518381 | 1.77E-09    | Os06g0505900 | 4.047854627 | 0.000185646 | Os03g0701500 | -1.885781458 | 1.03E-14    |
| Os09g0282100 | 1.896284809 | 3.12E-14    | Os06g0628032 | -3.863594529 | 3.65E-15    | Os01g0588600 | 4.043767364 | 0.000380229 | Os05g0499400 | -1.885220556 | 1.80E-10    |
| Os03g0609500 | 1.895217067 | 1.59E-15    | Os02g0658800 | -3.859123398 | 1.74E-62    | Os08g0461600 | 4.038309333 | 5.38E-33    | Os04g0650700 | -1.884317073 | 5.13E-105   |
| Os02g0465900 | 1.893207674 | 0           | Os05g0571200 | -3.84086564  | 0.000363229 | Os06g0356800 | 4.036062369 | 0.00011585  | Os01g0585300 | -1.881400585 | 7.14E-76    |
| Os11g0620450 | 1.892238516 | 0.002864713 | Os12g0274200 | -3.83166521  | 0.000412525 | Os08g0179400 | 4.021990145 | 0.000809595 | Os09g0482800 | -1.876514279 | 0.019578343 |
| Os03g0594400 | 1.890443972 | 0.008971302 | Os10g0413700 | -3.829615382 | 1.36E-28    | Os05g0367900 | 4.010748496 | 0.001305801 | Os05g0435800 | -1.874980979 | 0.036808266 |
| Os03g0805600 | 1.887238454 | 3.14E-39    | Os07g0184633 | -3.825476257 | 3.34E-05    | Os03g0386000 | 3.983377611 | 6.06E-208   | Os06g0261300 | -1.874536149 | 2.12E-10    |
| Os01g0848900 | 1.887137104 | 8.27E-20    | Os10g0414000 | -3.812915817 | 0.001522991 | Os03g0731800 | 3.981037284 | 0.001037067 | Os08g0151900 | -1.873461591 | 0.030752439 |
| Os05g0519300 | 1.885609614 | 0.010259086 | Os07g0269400 | -3.807932346 | 0.002164926 | Os03g0283750 | 3.979135613 | 0.000202226 | Os11g0491600 | -1.871430993 | 0.004838073 |
| Os07g0469100 | 1.884304704 | 5.08E-53    | Os06g0523300 | -3.783779799 | 1.60E-17    | Os11g0139400 | 3.963785457 | 0.001037067 | Os07g0566150 | -1.87103328  | 8.59E-05    |
| Os01g0637500 | 1.882267386 | 3.24E-25    | Os08g0529200 | -3.778784555 | 0.001033177 | Os01g0170000 | 3.962264288 | 0.000752646 | Os10g0168500 | -1.869059573 | 0.033047873 |
| Os08g0335200 | 1.880926623 | 8.16E-07    | Os04g0600200 | -3.776386522 | 8.11E-43    | Os10g0145000 | 3.949769174 | 2.85E-05    | Os01g0846800 | -1.860533374 | 0.00030188  |
| Os02g0673100 | 1.880332995 | 1.34E-10    | Os11g0457500 | -3.769432067 | 0.001116382 | Os01g0287600 | 3.944841799 | 3.17E-27    | Os05g0156500 | -1.860376158 | 0           |
| Os12g0480800 | 1.878249511 | 0.001081772 | Os11g0113900 | -3.769151485 | 0.001731194 | Os01g0893400 | 3.92696171  | 0           | Os02g0143300 | -1.859066805 | 0.035957614 |
| Os06g0697000 | 1.877637609 | 1.81E-304   | Os11g0181200 | -3.747371076 | 5.59E-33    | Os02g0796000 | 3.919361421 | 0.00036116  | Os06g0554600 | -1.857117658 | 1.88E-08    |
| Os11g0102500 | 1.875360112 | 0.005721473 | Os03g0583700 | -3.744955566 | 6.59E-06    | Os08g0553200 | 3.914612119 | 0.000735652 | Os01g0946800 | -1.855047092 | 0.046851929 |
| Os06g0149166 | 1.874000292 | 3.54E-37    | Os03g0196450 | -3.744437658 | 0.000152804 | Os03g0776400 | 3.903374134 | 0.000422304 | Os05g0458600 | -1.851452508 | 0.0001016   |
| Os03g0165300 | 1.870861526 | 0.028068971 | Os07g0541000 | -3.734870186 | 0.00284999  | Os01g0871900 | 3.902841885 | 1.25E-08    | Os03g0356498 | -1.840728677 | 3.27E-36    |
| Os12g0190200 | 1.870259918 | 2.33E-29    | BAC19865     | -3.732957339 | 0.00284999  | Os01g0275950 | 3.900187331 | 4.54E-16    | Os05g0367400 | -1.840608355 | 1.67E-42    |
| Os05g0163700 | 1.866301021 | 1.85E-56    | Os11g0303800 | -3.722935426 | 0.00284999  | Os11g0112400 | 3.890288214 | 3.57E-08    | Os08g0512700 | -1.834715023 | 0           |
| Os04g0511400 | 1.864078338 | 1.33E-18    | Os03g0191700 | -3.721406175 | 2.59E-18    | Os12g0586100 | 3.888721068 | 0           | Os05g0170200 | -1.833267121 | 0.          |

|              |             |             |              |              |             |              |             |             |              |                |             |
|--------------|-------------|-------------|--------------|--------------|-------------|--------------|-------------|-------------|--------------|----------------|-------------|
| Os04g0587500 | 1.852506513 | 7.01E-09    | Os02g0770800 | -3.656260537 | 1.78E-05    | Os01g0903100 | 3.840204779 | 0.001482162 | Os09g0566050 | -1.817787941   | 1.07E-16    |
| Os04g0511200 | 1.849940241 | 0.001310199 | Os12g0605900 | -3.645690411 | 1.21E-07    | Os01g0651200 | 3.828208437 | 0.001736028 | Os02g0644400 | -1.815982785   | 0.009586608 |
| Os05g0397800 | 1.846378637 | 7.84E-34    | Os07g0587300 | -3.6355123   | 0.001323349 | Os07g0146700 | 3.827120465 | 1.94E-73    | Os01g0872900 | -1.808761641   | 0.021369236 |
| Os01g0335600 | 1.840721856 | 0.004743374 | Os05g0442400 | -3.624599275 | 1.39E-17    | Os03g0294900 | 3.826141374 | 3.05E-07    | Os08g0196700 | -1.801504589   | 2.64E-177   |
| Os08g0233900 | 1.832696891 | 6.96E-38    | Os02g0834800 | -3.612299396 | 0.000225653 | Os11g0547000 | 3.820831397 | 0           | Os03g0626100 | -1.792311604   | 0.043221889 |
| Os09g0246300 | 1.832146621 | 3.83E-175   | Os04g0462200 | -3.612142636 | 4.23E-57    | Os08g0374600 | 3.815045557 | 4.41E-05    | Os06g0564700 | -1.789590283   | 6.38E-24    |
| Os07g0176200 | 1.830426064 | 0.001742549 | Os11g0172350 | -3.610899333 | 0.005013824 | Os01g0752500 | 3.813388242 | 1.76E-05    | Os01g0665900 | -1.785576634   | 5.26E-05    |
| Os08g0402500 | 1.829782651 | 0.045607168 | Os01g0152500 | -3.608648536 | 3.23E-05    | Os04g0225001 | 3.81132504  | 1.81E-06    | Os04g0551500 | -1.779675278   | 5.22E-12    |
| Os12g0591600 | 1.826903553 | 7.59E-14    | Os01g0149200 | -3.601582147 | 0.000721771 | Os12g0152500 | 3.810070337 | 2.17E-07    | Os06g0155500 | -1.778958823   | 5.06E-07    |
| Os03g0807900 | 1.825382426 | 2.59E-10    | Os05g0190500 | -3.601489088 | 1.55E-23    | Os10g0492900 | 3.808873367 | 7.14E-205   | Os08g0442400 | -1.777584408   | 2.75E-47    |
| Os03g0210000 | 1.82393022  | 0.043380621 | Os05g0594200 | -3.597021507 | 0.000387589 | Os10g0318700 | 3.805435158 | 0.000175884 | Os10g0373400 | -1.775050845   | 4.41E-41    |
| Os02g0592000 | 1.823431889 | 0.000958474 | Os01g0354175 | -3.591169192 | 0.005013824 | Os01g0710100 | 3.799985602 | 9.57E-73    | Os04g0638600 | -1.774862437   | 1.91E-05    |
| Os08g0100200 | 1.817444385 | 1.35E-30    | Os03g0371600 | -3.586922169 | 3.40E-83    | Os11g0103150 | 3.789190852 | 0.002260355 | Os08g0452500 | -1.772741912   | 9.20E-147   |
| Os07g0655800 | 1.815745512 | 0.00032197  | Os01g0364800 | -3.580346376 | 0.002805769 | Os10g0445400 | 3.785181055 | 6.63E-143   | Os01g0914300 | -1.772413451   | 0           |
| Os01g0344620 | 1.815053618 | 8.42E-05    | Os01g0971800 | -3.565368145 | 2.58E-67    | Os11g0454200 | 3.780145187 | 6.10E-47    | Os07g0516700 | -1.765653457   | 0.018495173 |
| Os05g0153300 | 1.813778264 | 0.004673908 | Os10g0132500 | -3.554431551 | 1.31E-09    | CAA34006     | 3.777521011 | 0.002260355 | Os01g0706900 | -1.763314896   | 0.035071243 |
| Os04g0411400 | 1.813656472 | 2.02E-05    | Os09g0279300 | -3.553724515 | 7.93E-21    | Os01g0699600 | 3.764404009 | 1.20E-09    | Os02g0106100 | -1.761452321   | 2.37E-27    |
| Os11g0118300 | 1.811550294 | 0.006538122 | Os07g0212400 | -3.5510243   | 8.17E-09    | Os02g0161500 | 3.763468361 | 0.000718648 | Os05g0460475 | -1.758483278   | 2.21E-07    |
| Os06g0316300 | 1.811377364 | 0.006661516 | Os02g0142950 | -3.544565045 | 3.33E-06    | Os10g0488300 | 3.760983189 | 0.002260355 | Os05g0582000 | -1.758258223   | 0.035071243 |
| Os08g0442400 | 1.811018905 | 1.25E-51    | Os08g0398350 | -3.538609976 | 0.005013824 | Os04g0412300 | 3.755142755 | 1.04E-120   | Os07g0673550 | -1.754119345   | 0.01953485  |
| Os12g0476200 | 1.808757382 | 1.26E-17    | Os04g0657100 | -3.531458742 | 0.000343991 | Os04g0443900 | 3.752733471 | 3.02E-20    | Os10g0551800 | -1.75160147    | 2.11E-18    |
| Os07g0571800 | 1.808049729 | 2.78E-05    | Os11g0275500 | -3.519533551 | 0.00406843  | Os06g0706400 | 3.742892766 | 1.04E-34    | Os10g0508000 | -1.750782333   | 0           |
| Os07g0673200 | 1.799932307 | 4.48E-44    | Os07g0539950 | -3.516254773 | 0.003073316 | Os01g0884300 | 3.742741511 | 1.95E-173   | Os05g0512200 | -1.749703827   | 1.38E-94    |
| Os01g0794400 | 1.799329555 | 6.97E-08    | Os01g0287600 | -3.511171411 | 2.45E-24    | Os06g0260500 | 3.741764124 | 6.48E-05    | Os11g0618700 | -1.742153169   | 0.036296787 |
| Os10g0136150 | 1.798173691 | 1.29E-81    | Os11g0132100 | -3.505074329 | 0.0067221   | Os04g0658200 | 3.736238141 | 0.001549125 | Os02g0774300 | -1.740861342   | 1.07E-84    |
| Os02g0575000 | 1.796438972 | 5.16E-06    | Os01g0816600 | -3.504209324 | 7.24E-09    | Os01g0113800 | 3.722999    | 4.95E-46    | Os05g0169900 | -1.737054599   | 3.45E-16    |
| Os12g0548401 | 1.795951871 | 7.41E-05    | Os02g0599150 | -3.50382822  | 0.000110588 | Os01g0135700 | 3.722091295 | 6.55E-245   | Os10g0407500 | -1.735548555   | 6.98E-05    |
| Os12g0600000 | 1.795060118 | 1.74E-17    | Os06g0127100 | -3.496439356 | 9.77E-30    | Os02g0189800 | 3.711221561 | 2.77E-06    | Os02g0710900 | -1.735271214   | 1.67E-142   |
| Os05g0512200 | 1.786889839 | 3.36E-89    | Os01g0342500 | -3.495605088 | 0.003936562 | Os11g0303800 | 3.701823661 | 0.002959506 | Os08g0532900 | -1.733240542   | 0.000439378 |
| Os11g0684000 | 1.780942087 | 0.005194309 | Os09g0518750 | -3.492178448 | 1.45E-05    | Os08g0162250 | 3.699799596 | 0.000293817 | Os11g0661600 | -1.731176465   | 2.92E-06    |
| Os01g0348900 | 1.777557011 | 7.03E-06    | Os08g0394700 | -3.483944887 | 0.0067221   | Os03g0167550 | 3.672499333 | 7.63E-05    | Os03g0206700 | -1.731081569   | 0.002910591 |
| Os06g0105800 | 1.777367761 | 2.22E-208   | Os07g0283700 | -3.472709708 | 0.000641858 | Os02g0540000 | 3.671578143 | 0.00197722  | Os03g0773000 | -1.730134493   | 6.30E-41    |
| Os07g0617000 | 1.776495048 | 1.58E-13    | Os05g0116600 | -3.443859636 | 0.004764648 | Os11g0615900 | 3.671453691 | 0.000507398 | Os12g0472800 | -1.728558694   | 1.74E-33    |
| Os09g0325800 | 1.767983084 | 1.56E-08    | Os11g0601600 | -3.423769215 | 0.009051583 | Os11g0498600 | 3.6671515   | 0           | Os06g0692050 | -1.726348271   | 0.004165791 |
| Os01g0498300 | 1.767114952 | 4.22E-06    | Os04g0171800 | -3.408342756 | 1.04E-06    | Os12g0235200 | 3.666880518 | 8.39E-17    | Os05g0368100 | -1.725005312   | 0.009781551 |
| Os05g0493600 | 1.766585442 | 0.04644328  | Os04g0136200 | -3.408007349 | 2.27E-06    | Os08g0556500 | 3.665930858 | 4.36E-17    | Os01g0136200 | -1.724769271   | 0.004252901 |
| Os05g0102000 | 1.765576318 | 3.13E-10    | Os03g0675600 | -3.374478868 | 0.009051583 | Os03g0639233 | 3.656148282 | 6.17E-05    | Os12g0194900 | -1.724648347   | 3.02E-53    |
| Os01g0557100 | 1.76541124  | 0.010186818 | Os02g0534000 | -3.372125905 | 0.012309471 | Os01g0807266 | 3.655495175 | 0.000179777 | Os07g0641700 | -1.719612135   | 4.12E-230   |
| Os10g0565401 | 1.759340469 | 0.001604662 | Os07g0639100 | -3.371042226 | 2.14E-05    | Os03g0250000 | 3.654610982 | 6.93E-225   | Os08g0114100 | -1.715749246   | 4.96E-10    |
| Os08g0519000 | 1.758223073 | 7.05E-05    | Os12g0182100 | -3.36849679  | 0.007126313 | Os01g0601000 | 3.651626425 | 0.003906703 | CAA33934     | -1.714782221   | 0.011760761 |
| Os05g0195700 | 1.755141993 | 7.89E-35    | Os03g0259100 | -3.364539229 | 0.000102996 | Os05g0129400 | 3.650435665 | 0.003906703 | Os07g0648566 | -1.70959719    | 7.89E-17    |
| Os02g0134200 | 1.753065592 | 8.50E-14    | Os10g0150800 | -3.363493078 | 9.29E-17    | Os11g0606800 | 3.647341846 | 0.000102847 | Os12g0612700 | -1.709293933   | 4.83E-287   |
| Os05g0426000 | 1.752276588 | 0.047795407 | Os11g0643400 | -3.362153857 | 0.004213257 | Os02g0774100 | 3.639507348 | 2.82E-98    | Os12g0274700 | -1.70879488    | 3.22E-24    |
| Os07g0689950 | 1.750723603 | 6.26E-106   | Os07g0578050 | -3.359721125 | 8.98E-06    | Os01g0705200 | 3.632158895 | 0           | Os04g0480200 | -1.707609621   | 1.43E-05    |
| Os03g0109300 | 1.744380446 | 2.45E-128   | Os10g0368100 | -3.355909116 | 0.007600719 | Os04g0649000 | 3.623217716 | 0.001693431 | Os05g0163000 | -1.70551482    | 4.45E-20    |
| Os04g0603900 | 1.741264535 | 0.002517186 | Os06g0491566 | -3.355011602 | 0.006248652 | Os05g0421600 | 3.619409885 | 5.89E-30    | Os12g0277500 | -1.704739288   | 3.00E-70    |
| Os09g0437500 | 1.740329771 | 0           | Os12g0160500 | -3.352239613 | 4.17E-07    | Os05g0376400 | 3.618981147 | 1.80E-13    | Os12g0126100 | -1.704603566   | 0.002129749 |
| Os02g0682700 | 1.738668241 | 4.60E-24    | Os08g0346600 | -3.349062247 | 0.005966757 | Os02g0478900 | 3.615806734 | 0.000135319 | Os03g0297000 | -1.704297658   | 0.011506309 |
| Os12g0108000 | 1.737262191 | 5.15E-06    | Os02g0501350 | -3.344702706 | 9.52E-62    | Os01g0587300 | 3.61006493  | 1.22E-13    | Os09g0519100 | -1.701101069   | 1.01E-06    |
| Os03g0158500 | 1.736169715 | 1.26E-127   | Os02g0118950 | -3.344571961 | 2.22E-05    | Os10g0191000 | 3.59415152  | 4.17E-06    | Os08g0462000 | -1.699207549   | 0.020669918 |
| Os04g0559750 | 1.733475531 | 0.01303861  | Os12g0509600 | -3.339329273 | 1.62E-05    | Os08g0110600 | 3.589662056 | 9.13E-10    | Os03g0180100 | -1.698250165   | 4.07E-09    |
| Os07g0692500 | 1.729186795 | 2.16E-23    | Os05g0324700 | -3.336940164 | 2.70E-18    | Os11g0172350 | 3.577972708 | 0.005178058 | Os07g0580733 | -1.697515583   | 0.011080887 |
| Os09g0472200 | 1.726180876 | 1.93E-21    | Os09g0356000 | -3.309214504 | 0.002154726 | Os02g0678601 | 3.577942945 | 6.98E-36    | Os08g0119800 | -1.69719244    | 9.44E-05    |
| Os08g0529000 | 1.725848372 | 7.20E-05    | Os01g0219300 | -3.307789523 | 0.000737829 | Os08g0387050 | 3.568333241 | 0.000478135 | Os11g0687200 | -1.692812008   | 1.02E-78    |
| Os01g0511700 | 1.725015256 | 6.96E-80    | Os03g0391100 | -3.299524061 | 0.012309471 | Os10g0343500 | 3.566982204 | 0.000158567 | Os04g0676100 | -1.688755237   | 1.82E-98    |
| Os09g0522200 | 1.724642862 | 1.08E-05    | Os01g0645900 | -3.291597261 | 5.34E-09    | Os12g0111800 | 3.556880469 | 2.60E-14    | Os01g0125800 | -1.688462475   | 7.39E-211   |
| Os01g0266800 | 1.71599168  | 1.27E-225   | Os10g0471000 | -3.28790233  | 1.13E-11    | Os06g0142400 | 3.553527181 | 6.30E-69    | Os07g0587000 | -1.687669458   | 0.000783778 |
| Os12g0581950 | 1.714573334 | 0.040082772 | Os03g0165900 | -3.282743232 | 1.49E-06    | Os02g0824350 | 3.547242041 | 8.09E-05    | Os04g0457000 | -1.687239018   | 1.28E-191   |
| Os04g0493400 | 1.707484868 | 1.65E-10    | Os03g0107500 | -3.282349943 | 0.010417219 | Os09g0572000 | 3.534371115 | 0.003268178 | Os05g0574500 | -1.687152924   | 1.45E-07    |
| Os02g0498100 | 1.704874581 | 3.15E-41    | Os11g0429000 | -3.282267484 | 0.001061973 | Os06g0207783 | 3.533666172 | 0.0069112   | Os01g0944900 | -1.685878537   | 0.000635564 |
| Os01g0785300 | 1.700147503 | 2.22E-26    | Os08g0302000 | -3.276479969 | 2.63E-133   | Os03g0670366 | 3.530903446 | 4.70E-07    | Os01g0759900 | -1.684805713   | 4.71E-18    |
| Os12g0256400 | 1.697591774 | 0.016026418 | Os01g0660200 | -3.275254557 | 1.19E-05    | Os06g0573900 | 3.527973538 | 0.0069112   | Os11g0422000 | -1.684422515   | 0.001933055 |
| Os04g0659800 | 1.696386383 | 1.33E-09    | Os04g0307800 | -3.274964386 | 2.76E-07    | Os05g0552000 | 3.527128716 | 7.94E-08    | Os07g0509800 | -1.683817398   | 1.11E-63    |
| Os04g0461750 | 1.695851992 | 2.03E-09    | Os02g0173650 | -3.273423332 | 4.24E-06    | Os10g0495433 | 3.52450225  | 4.09E-05    | Os09g0131200 | -1.683707359   | 0.018251859 |
| Os06g0726200 | 1.69236637  | 0.019675283 | Os08g0118500 | -3.270215729 | 0.016839942 | Os12g0177200 | 3.518547889 | 0.0069112   | Os06g0506600 | -1.682648767   | 3.32E-154   |
| Os03g0160000 | 1.691675236 | 5.15E-23    | Os12g0618000 | -3.264095294 | 9.09E-08    | Os11g0308432 | 3.512830875 | 5.03E-31    | Os01g0935800 | -1.682537964</ |             |

|              |             |             |              |              |             |              |             |             |              |              |                       |
|--------------|-------------|-------------|--------------|--------------|-------------|--------------|-------------|-------------|--------------|--------------|-----------------------|
| Os04g0344100 | 1.680087707 | 0.016665733 | Os08g0259100 | -3.242953904 | 5.24E-27    | Os01g0317125 | 3.471825596 | 3.43E-05    | Os09g0503000 | -1.670707083 | 0.003665016           |
| Os02g0620600 | 1.678561224 | 0.002275501 | Os11g0595000 | -3.240801724 | 0.016839942 | Os03g0357500 | 3.461554354 | 3.60E-12    | Os01g0127600 | -1.669574543 | 9.48E-147             |
| Os08g0494100 | 1.678348923 | 0.007115581 | Os07g0504500 | -3.240207201 | 0.016839942 | Os11g0573800 | 3.458796381 | 2.37E-05    | Os01g0581800 | -1.665725178 | 0.010129219           |
| Os01g0192300 | 1.675668559 | 2.28E-06    | Os05g0494600 | -3.239929398 | 9.91E-64    | Os01g0239300 | 3.455224407 | 2.07E-05    | Os08g0492500 | -1.66566558  | 1.38E-36              |
| Os03g0789800 | 1.673494977 | 1.11E-111   | Os07g0606000 | -3.237907895 | 0.00013326  | Os07g0580300 | 3.44807192  | 0.009303597 | Os08g0504800 | -1.665003451 | 3.39E-05              |
| Os04g0587400 | 1.671360277 | 3.04E-05    | Os12g0115700 | -3.21966821  | 4.99E-08    | Os11g0598900 | 3.44094058  | 2.04E-09    | Os10g0101100 | -1.663824365 | 3.81E-07              |
| Os05g0349800 | 1.669341529 | 3.16E-27    | Os06g0725700 | -3.218905749 | 0.016839942 | Os01g0936000 | 3.430196448 | 0.009303597 | Os03g0776900 | -1.663554707 | 9.11E-19              |
| Os06g0295366 | 1.66320803  | 0.000998379 | Os01g0682700 | -3.212392617 | 5.02E-20    | Os12g0220866 | 3.424625603 | 0.009303597 | Os06g0196200 | -1.662266791 | 3.01E-25              |
| Os03g0332100 | 1.662614778 | 6.74E-23    | Os01g0920500 | -3.212161475 | 0.016839942 | Os02g0817400 | 3.421798268 | 0.00887383  | Os02g0139100 | -1.659105588 | 1.88E-283             |
| Os03g0135550 | 1.660309664 | 3.19E-39    | Os02g0803600 | -3.210002412 | 0.000106086 | Os03g0362500 | 3.415406704 | 0.009303597 | Os04g0339800 | -1.658461305 | 0.005954943           |
| Os02g0453600 | 1.660244163 | 0.01733506  | Os06g0185300 | -3.208399837 | 0.001783737 | Os03g0226200 | 3.403606412 | 0.005411623 | Os03g0570800 | -1.657723215 | 0.014194575           |
| Os09g0444800 | 1.659996817 | 0.000817746 | Os09g0491612 | -3.207966815 | 4.24E-26    | Os03g0389501 | 3.403329383 | 3.60E-10    | Os03g0807900 | -1.656596298 | 2.87E-06              |
| Os03g0748300 | 1.659452574 | 7.16E-15    | Os06g0171500 | -3.202753146 | 0.016839942 | Os04g0649200 | 3.402504505 | 0.005155429 | Os02g0504900 | -1.655938145 | 3.03E-140             |
| Os09g0549300 | 1.658434345 | 4.43E-15    | Os08g0235651 | -3.200503371 | 0.016839942 | Os07g0484401 | 3.397979052 | 1.75E-06    | Os02g0181900 | -1.649776353 | 4.30E-177             |
| Os05g0215700 | 1.6578986   | 2.08E-09    | Os05g0473401 | -3.200188037 | 6.20E-08    | Os03g0781100 | 3.397452607 | 1.67E-29    | Os01g0518300 | -1.647478881 | 4.45E-06              |
| Os10g0394700 | 1.65734819  | 0.005506156 | Os02g0509600 | -3.19983159  | 0.016839942 | Os11g0558200 | 3.396756647 | 0.005890088 | Os03g0293000 | -1.647337849 | 1.17E-189             |
| Os08g0137400 | 1.655482057 | 2.56E-07    | Os06g0610100 | -3.196205171 | 0.016839942 | Os11g0439600 | 3.388706673 | 5.52E-28    | Os06g0198500 | -1.6469244   | 3.26E-92              |
| Os03g0294032 | 1.655364464 | 3.58E-38    | Os04g0368300 | -3.19583832  | 0.016839942 | Os03g0178300 | 3.387888839 | 0.009303597 | Os01g0558700 | -1.644874093 | 0.003081197           |
| Os03g0639233 | 1.655042996 | 8.27E-06    | Os01g0944900 | -3.194064505 | 0.002352746 | Os03g0687400 | 3.387365447 | 0.000345775 | Os09g0306800 | -1.64453058  | 4.51576000298899e-321 |
| Os02g0123200 | 1.653123183 | 4.51E-229   | Os01g0331100 | -3.18879116  | 4.63E-06    | Os05g0427400 | 3.370658491 | 8.50E-06    | Os11g0312400 | -1.644182175 | 3.29E-11              |
| Os10g0130500 | 1.651215993 | 7.53E-170   | Os05g0559800 | -3.188263389 | 0.001943761 | Os10g0374450 | 3.363082611 | 0.012596076 | Os01g0829900 | -1.640615496 | 2.75E-07              |
| Os05g0338933 | 1.650620482 | 0.016661923 | Os03g0297900 | -3.187915014 | 0.014732872 | Os06g0716100 | 3.361781933 | 4.87E-09    | Os01g0756300 | -1.639236591 | 1.77E-73              |
| Os08g0202300 | 1.650466744 | 5.59E-20    | Os02g0580600 | -3.179210887 | 0.011743308 | Os02g0789700 | 3.352532903 | 0.012596076 | Os09g0542550 | -1.638726807 | 0.041007029           |
| Os03g0404500 | 1.646137486 | 2.01E-25    | Os05g0506600 | -3.178122073 | 0.016249316 | Os06g0491566 | 3.339134343 | 0.008037364 | Os01g0703600 | -1.637695495 | 0.018631059           |
| Os12g0206800 | 1.645500315 | 0.000192233 | Os04g0529100 | -3.173501311 | 3.21E-82    | Os06g0181100 | 3.329451642 | 6.77E-32    | Os03g0114400 | -1.63743525  | 0.016520602           |
| Os04g0414800 | 1.639630703 | 0.003244772 | Os10g0340600 | -3.171811177 | 0.000141507 | Os07g0248800 | 3.327395705 | 0.004614208 | Os03g0213100 | -1.637400843 | 2.38E-105             |
| Os03g0808350 | 1.637688945 | 0.003697083 | Os04g0141800 | -3.170123984 | 0.017741729 | Os11g0173432 | 3.324361726 | 0.012596076 | Os09g0546900 | -1.636034278 | 6.97E-07              |
| Os05g0144100 | 1.637527449 | 1.08E-178   | Os05g0245300 | -3.168612035 | 0.003436587 | Os01g0919800 | 3.323989362 | 1.65E-05    | Os08g0104600 | -1.633244405 | 2.99E-149             |
| Os08g0120600 | 1.63617892  | 0.031955146 | Os08g0195800 | -3.16644164  | 0.016053637 | Os09g0108450 | 3.322636753 | 5.28E-12    | Os09g0508200 | -1.629616253 | 1.08E-60              |
| Os01g0173600 | 1.635842446 | 5.61E-10    | Os05g0475700 | -3.165641033 | 0.004363365 | Os08g0210300 | 3.315382961 | 0.012596076 | Os06g0598800 | -1.628923482 | 2.40E-186             |
| Os05g0191700 | 1.633576045 | 6.03E-19    | Os05g0570350 | -3.164421341 | 1.25E-14    | Os02g0629000 | 3.31476306  | 1.68E-72    | Os02g0100300 | -1.628747464 | 8.84E-137             |
| Os05g0562200 | 1.632441269 | 3.14E-248   | Os05g0250000 | -3.16389319  | 2.36E-11    | Os12g0148400 | 3.314299198 | 1.23E-09    | Os07g0440700 | -1.628153164 | 4.76E-19              |
| Os07g0475900 | 1.630544177 | 3.79E-141   | Os03g0680300 | -3.161298872 | 0.020434088 | Os07g0586500 | 3.310961808 | 4.49E-15    | Os12g0580950 | -1.628070138 | 9.53E-169             |
| Os02g0690000 | 1.627779797 | 2.38E-95    | Os09g0489800 | -3.160951675 | 7.96E-07    | Os03g0268600 | 3.310249623 | 1.37E-73    | Os11g0591200 | -1.622713359 | 1.67E-12              |
| Os10g0567400 | 1.624835625 | 3.04E-122   | Os03g0655100 | -3.16003737  | 5.61E-13    | Os08g0517001 | 3.308936011 | 6.17E-07    | Os11g0471100 | -1.622437735 | 1.89E-173             |
| Os07g0598000 | 1.624574013 | 9.45E-30    | Os08g0457400 | -3.148411763 | 6.34E-20    | Os09g0323100 | 3.305102145 | 0.000167658 | Os08g0113100 | -1.62156981  | 1.94E-245             |
| Os10g0122600 | 1.624066893 | 0.024344549 | Os11g0263000 | -3.145310004 | 9.66E-07    | Os02g0118950 | 3.30506835  | 0.000103136 | Os08g0500700 | -1.621013918 | 7.56E-282             |
| Os06g0136900 | 1.62272756  | 4.80E-32    | Os01g0566000 | -3.138640979 | 4.07E-31    | Os09g0428300 | 3.304921893 | 9.32E-21    | Os12g0569200 | -1.617664925 | 1.64E-79              |
| Os08g0509600 | 1.621138231 | 1.37E-256   | Os12g0204800 | -3.133459675 | 0.011003491 | Os01g0761400 | 3.292909052 | 0.000144081 | Os04g0630100 | -1.616568795 | 1.57E-77              |
| Os04g0515900 | 1.618295357 | 9.95E-09    | Os05g0150100 | -3.132170692 | 8.56E-07    | Os10g0395000 | 3.290992918 | 0.00600296  | Os02g0595200 | -1.615934111 | 0.001679678           |
| Os10g0391500 | 1.61625939  | 3.10E-222   | Os01g0806600 | -3.12570179  | 4.06E-07    | Os05g0484000 | 3.290357124 | 0.012596076 | Os06g0593800 | -1.614586815 | 6.01E-34              |
| Os06g0634700 | 1.613400425 | 5.01E-13    | Os02g0492600 | -3.125115262 | 1.03E-08    | Os03g0396200 | 3.276953214 | 0.000814423 | Os02g0629800 | -1.613606785 | 1.18E-186             |
| Os10g0431900 | 1.610861361 | 0.000179416 | Os02g0120500 | -3.124948334 | 2.35E-87    | Os02g0120100 | 3.273513208 | 0.012596076 | Os06g0122001 | -1.613123209 | 1.38E-07              |
| Os03g0184550 | 1.608560319 | 0.021859149 | Os04g0419550 | -3.124748464 | 0.023223602 | Os08g0153600 | 3.267336508 | 3.32E-07    | Os07g0171100 | -1.61247678  | 3.22E-22              |
| Os01g0221000 | 1.606693588 | 7.13E-35    | Os01g0892500 | -3.123167923 | 0.000575943 | Os05g0119100 | 3.265701161 | 0.00600296  | Os05g0575000 | -1.610613495 | 0.023049734           |
| Os03g0100100 | 1.604659178 | 0.036022278 | Os02g0114800 | -3.119905768 | 0.005548252 | Os10g0578200 | 3.26286857  | 3.26E-05    | Os03g0328300 | -1.610387089 | 4.26E-33              |
| Os01g0284900 | 1.604121083 | 0.025697521 | Os02g0543200 | -3.119230058 | 1.22E-05    | Os08g0299600 | 3.25905369  | 2.15E-23    | Os05g0424000 | -1.608047454 | 0.020657727           |
| Os01g0681600 | 1.603082569 | 1.55E-75    | Os06g0629362 | -3.115128279 | 0.000992565 | Os02g0445200 | 3.251107049 | 0.016212815 | Os09g0449800 | -1.60701887  | 9.78E-37              |
| Os10g0572300 | 1.601087476 | 7.23E-157   | Os10g0495466 | -3.114211901 | 6.23E-13    | Os05g0380850 | 3.250160017 | 0.017167161 | Os07g0694700 | -1.606788389 | 5.81E-248             |
| Os06g0490000 | 1.600807207 | 3.71E-66    | Os01g0785600 | -3.104166411 | 0.011003491 | Os04g0615550 | 3.245386929 | 0.01144278  | Os02g0115900 | -1.604261005 | 1.71E-288             |
| Os02g0610700 | 1.596078317 | 7.01E-91    | Os11g0179700 | -3.103630423 | 7.87E-05    | Os06g0140900 | 3.244460958 | 0.012026089 | Os06g0118000 | -1.603294433 | 4.14E-19              |
| Os07g0600000 | 1.588656388 | 0.019920628 | Os11g0698567 | -3.098807125 | 4.66E-09    | Os03g0798000 | 3.235382326 | 0.017167161 | Os02g0187700 | -1.598986384 | 1.93E-143             |
| Os08g0553700 | 1.588390895 | 4.94E-07    | Os05g0499100 | -3.097564313 | 1.47E-31    | Os03g0656800 | 3.235136058 | 0.004930609 | Os02g0731600 | -1.598879169 | 2.62E-33              |
| Os01g0964333 | 1.587739542 | 1.19E-13    | Os10g0570700 | -3.097242751 | 1.06E-06    | Os02g0181700 | 3.234500736 | 0.000532716 | Os12g0634400 | -1.598717398 | 8.21E-49              |
| Os06g0701700 | 1.58688993  | 0.037335047 | Os12g0589000 | -3.09318342  | 0.000212718 | Os09g0418375 | 3.215185013 | 0.001694678 | Os05g0170250 | -1.597322269 | 7.29E-07              |
| Os02g0199800 | 1.582410003 | 2.29E-40    | Os05g0527800 | -3.090717695 | 0.032203558 | Os05g0305150 | 3.212806077 | 0.002220841 | Os03g0760800 | -1.597108999 | 6.53E-129             |
| Os02g0640800 | 1.581497973 | 9.30E-257   | Os01g0607000 | -3.090717695 | 0.032203558 | Os09g0568700 | 3.211303483 | 0.017167161 | Os10g0462900 | -1.595239797 | 0                     |
| Os05g0456100 | 1.580323674 | 2.98E-29    | Os03g0812300 | -3.085850295 | 6.05E-06    | Os02g0638650 | 3.206128498 | 1.24E-127   | Os03g0390600 | -1.594643246 | 0                     |
| Os12g0433200 | 1.579172412 | 3.98E-27    | Os09g0526600 | -3.078901218 | 3.08E-87    | Os04g0690451 | 3.204868555 | 1.03E-07    | Os11g0671950 | -1.589689808 | 0.047637035           |
| Os07g0638300 | 1.578515736 | 6.08E-05    | Os05g0184901 | -3.078089492 | 0.023223602 | Os08g0395400 | 3.204324266 | 0.000502798 | Os02g0542450 | -1.586161387 | 0.022767302           |
| Os08g0446550 | 1.576041424 | 0.003487747 | Os08g0152400 | -3.075832637 | 0.00044584  | Os02g0518500 | 3.203387697 | 4.13E-09    | Os09g0500900 | -1.585465168 | 3.13E-36              |
| Os04g0555300 | 1.575454297 | 5.19E-200   | Os01g0669100 | -3.074268568 | 0.032203558 | Os01g0384450 | 3.187586494 | 1.94E-31    | Os05g0296750 | -1.585347576 | 2.73E-09              |
| Os05g0165900 | 1.574546553 | 5.89E-56    | Os12g0292200 | -3.073916774 | 0.005548252 | Os09g0445600 | 3.183178938 | 1.51E-78    | Os01g0235100 | -1.585216372 | 9.15E-84              |
| Os11g0493100 | 1.572867274 | 2.25E-05    | Os05g0481700 | -3.071461259 | 0.005548252 | Os06g0720301 | 3.181929245 | 1.71E-09    | Os01g0962700 | -1.58170075  | 2.57E-21              |
| Os11g0490600 | 1.570698587 | 9.74E-14    | Os02g0638650 | -3.070862451 | 8.44E-142   | Os11g0453600 | 3.180839276 | 0.017167161 | Os02g0184200 | -1.579807488 | 2.27E-51              |
| Os11g0166201 | 1.568305562 | 6.73E-16    | Os03g0371300 | -3.070795376 | 0           |              |             |             |              |              |                       |



|              |             |              |              |              |             |              |             |             |               |              |             |
|--------------|-------------|--------------|--------------|--------------|-------------|--------------|-------------|-------------|---------------|--------------|-------------|
| Os03g0367101 | 1.558603141 | 0.009323418  | Os02g0774200 | -3.056602985 | 0.005548252 | Os12g0175800 | 3.164416265 | 1.65E-10    | Os02g0280200  | -1.57180512  | 2.17E-05    |
| Os09g0465500 | 1.555652345 | 2.84E-62     | Os09g0322100 | -3.056376852 | 0.032203558 | Os02g0666900 | 3.153582085 | 0.004557821 | Os08g0532300  | -1.568942053 | 1.34E-224   |
| Os10g0177200 | 1.555359834 | 1.57E-18     | Os11g0609500 | -3.055063722 | 0.032203558 | Os08g0521000 | 3.149277032 | 1.70E-07    | Os02g0302700  | -1.568122853 | 0.00082295  |
| Os05g0424000 | 1.554989771 | 0.030482311  | Os02g0251900 | -3.053067885 | 0.032203558 | Os02g0142950 | 3.138809254 | 1.82E-05    | Os07g01123400 | -1.56792475  | 6.21E-06    |
| Os10g0190500 | 1.553682943 | 1.71E-09     | Os12g0431300 | -3.052830274 | 0.032203558 | Os03g0808350 | 3.134423365 | 0.004557821 | Os07g0104100  | -1.565883414 | 4.49E-10    |
| Os03g0198600 | 1.553660015 | 6.50E-158    | Os12g0591300 | -3.052356186 | 0.032203558 | Os06g0184700 | 3.134316267 | 4.88E-10    | Os01g0254000  | -1.564589046 | 3.17E-257   |
| Os07g0669700 | 1.553105283 | 1.70E-21     | Os07g0688200 | -3.04653737  | 0.005548252 | Os09g0128400 | 3.129237945 | 8.11E-145   | Os08g0189600  | -1.563814572 | 3.36E-07    |
| Os03g0760300 | 1.552718966 | 2.81E-12     | Os08g0457000 | -3.046189091 | 4.40E-204   | Os09g0324200 | 3.126755295 | 0.011496733 | Os07g0667300  | -1.560484262 | 4.04E-08    |
| Os03g0360600 | 1.551473769 | 3.87E-18     | Os12g0182366 | -3.037261814 | 0.007598864 | Os08g0336500 | 3.126350979 | 1.12E-16    | Os11g0265000  | -1.560119378 | 2.24E-13    |
| Os02g0829000 | 1.5507244   | 5.40E-15     | Os07g0268800 | -3.03244456  | 1.29E-06    | Os01g0176100 | 3.121408308 | 0.006129904 | Os11g0195700  | -1.558846349 | 0.001129609 |
| Os02g0223200 | 1.548933849 | 7.80E-07     | Os02g0190100 | -3.031237978 | 1.19E-06    | Os01g0384800 | 3.110639442 | 5.16E-111   | Os01g0931000  | -1.558655329 | 0.019029    |
| Os08g0352400 | 1.544078039 | 1.83E-37     | Os07g0446000 | -3.023436224 | 0.004519175 | Os06g0651200 | 3.106384814 | 5.79E-56    | Os02g0744900  | -1.558605364 | 1.52E-83    |
| Os05g0134400 | 1.537110226 | 4.38E-57     | Os06g0196600 | -3.021534784 | 0.000144665 | Os04g0432250 | 3.103789129 | 6.30E-20    | Os08g0540400  | -1.558086088 | 5.31E-09    |
| Os10g0414800 | 1.534632804 | 0.008117523  | Os02g0706900 | -3.021322865 | 0.000753142 | Os05g0355400 | 3.101971077 | 1.80E-08    | Os05g0471000  | -1.557477535 | 0.025540832 |
| Os02g0216300 | 1.534324974 | 8.54E-242    | Os02g0265800 | -3.01955899  | 0.007115384 | Os02g0566300 | 3.101310358 | 1.04E-194   | Os08g0152400  | -1.557395176 | 0.014360623 |
| Os07g0591700 | 1.534316342 | 1.17E-195    | Os11g0474900 | -3.016968176 | 5.36E-06    | Os01g0267300 | 3.101194907 | 0.011496733 | Os12g0162400  | -1.556794377 | 2.65E-92    |
| Os08g0542300 | 1.534224219 | 1.27E-113    | Os07g0624900 | -3.013949731 | 6.99E-08    | Os07g0633300 | 3.100651733 | 0.009832635 | Os02g0640800  | -1.554512919 | 6.59E-244   |
| Os03g0131333 | 1.533255361 | 0.0310111254 | Os12g0511200 | -3.008407302 | 2.97E-07    | Os08g0298901 | 3.097986205 | 0.023599586 | Os05g0477200  | -1.554058862 | 0.021478336 |
| Os11g0533400 | 1.531696434 | 5.70E-07     | Os09g0442100 | -3.006857193 | 4.95E-13    | Os03g0129400 | 3.094634682 | 1.66E-37    | Os02g0606400  | -1.552686937 | 0.0489138   |
| Os06g0167500 | 1.530744768 | 4.53E-219    | Os07g0534400 | -3.002065141 | 0.026586681 | Os05g0546500 | 3.09384814  | 7.43E-05    | Os07g0206900  | -1.550292036 | 0.000312323 |
| Os08g0102700 | 1.530532939 | 2.70E-08     | Os07g0585200 | -3.001264138 | 3.90E-07    | Os01g0785600 | 3.091261877 | 0.011496733 | Os05g0303000  | -1.548635515 | 1.66E-188   |
| Os06g0246500 | 1.530469461 | 6.97E-108    | Os10g0134033 | -3.000635866 | 6.81E-05    | Os10g0391400 | 3.084520361 | 0.000733192 | Os04g0460600  | -1.545509539 | 1.03E-24    |
| Os02g0705500 | 1.526524308 | 1.68E-36     | Os12g0126050 | -2.99968259  | 0.032203558 | Os08g0563400 | 3.082935678 | 0.00706308  | Os02g0806400  | -1.544520302 | 0.009007291 |
| Os03g0648400 | 1.52616406  | 9.14E-210    | Os02g0722300 | -2.995446814 | 0.032203558 | Os11g0134100 | 3.080306603 | 0.023599586 | Os06g0121500  | -1.54370155  | 1.17E-61    |
| Os08g0159500 | 1.52502643  | 8.57E-189    | Os05g0248301 | -2.99524044  | 0.00015661  | Os10g0463100 | 3.079746871 | 0.023599586 | Os12g0119000  | -1.543319088 | 0.045555789 |
| Os05g0279850 | 1.524837024 | 1.27E-09     | Os12g0594000 | -2.988703456 | 1.73E-31    | Os03g0803800 | 3.079618966 | 1.94E-07    | Os12g0292400  | -1.543207686 | 1.72E-10    |
| Os03g0703300 | 1.524709257 | 6.16E-17     | Os02g0786400 | -2.988069765 | 0.000683399 | Os02g0588550 | 3.078682254 | 0.00260331  | Os04g0548500  | -1.5377621   | 0.000132425 |
| Os05g0454500 | 1.524435349 | 7.03E-60     | Os07g0269450 | -2.987582144 | 1.17E-07    | Os01g0682700 | 3.074486893 | 1.98E-19    | Os08g0320100  | -1.536604184 | 1.47E-29    |
| Os06g0244000 | 1.517327279 | 6.69E-05     | Os09g0295200 | -2.983035515 | 0.013803335 | Os05g0142400 | 3.074145775 | 2.28E-31    | Os08g0506000  | -1.535478364 | 7.11E-30    |
| Os07g0685000 | 1.516527173 | 7.44E-85     | Os05g0252100 | -2.98260905  | 0.032203558 | Os12g0607800 | 3.072962315 | 0.007891566 | Os01g0102400  | -1.5341183   | 0.007367107 |
| Os04g0639300 | 1.508988664 | 3.31E-43     | Os02g0117700 | -2.979234396 | 0.032203558 | Os05g0184901 | 3.067247738 | 0.032592904 | Os05g0508900  | -1.532413127 | 2.66E-47    |
| Os03g0684800 | 1.507219934 | 6.46E-31     | Os02g0113300 | -2.975102668 | 0.017353676 | Os01g0753400 | 3.06197059  | 0.023599586 | Os11g0156700  | -1.532125616 | 0.039885208 |
| Os02g0798800 | 1.506556923 | 1.34E-18     | Os06g0697500 | -2.966088768 | 0.002419756 | Os10g0466800 | 3.060974826 | 9.05E-77    | Os06g0679600  | -1.531416548 | 5.38E-22    |
| Os03g0364700 | 1.504968472 | 5.07E-140    | Os10g0499700 | -2.965700465 | 0.005242339 | Os01g0743732 | 3.058794078 | 0.004438429 | Os12g0594950  | -1.528503328 | 6.91E-11    |
| Os07g0646200 | 1.504527119 | 2.34E-24     | Os12g0509300 | -2.96563838  | 1.73E-07    | Os01g0229700 | 3.057853265 | 9.66E-06    | Os01g0279100  | -1.527088161 | 2.45E-207   |
| Os01g0183300 | 1.501116941 | 3.50E-08     | Os08g0372700 | -2.960175523 | 4.44E-07    | Os04g0486350 | 3.057583968 | 0.023599586 | Os06g0150300  | -1.523848881 | 0.008262962 |
| Os02g0161601 | 1.500718468 | 4.18E-08     | Os11g0623800 | -2.959925418 | 0.045038631 | Os08g0254600 | 3.056731852 | 4.23E-10    | Os02g0519700  | -1.520137836 | 1.15E-05    |
| Os09g0482800 | 1.498924377 | 0.02372081   | Os07g0116800 | -2.958599568 | 0.039511612 | Os10g0437500 | 3.05623483  | 2.51E-30    | Os07g0414000  | -1.516543905 | 2.35E-10    |
| Os03g0257600 | 1.497232321 | 0.001228131  | Os12g0573600 | -2.956689104 | 8.46E-25    | Os03g0683500 | 3.055032306 | 3.01E-05    | Os03g0374575  | -1.516409312 | 2.20E-194   |
| Os10g0550775 | 1.494007931 | 7.38E-10     | Os11g0160300 | -2.95622616  | 2.10E-15    | Os07g0138400 | 3.051400967 | 0.005789152 | Os07g0185300  | -1.516324974 | 8.59E-152   |
| Os02g0280200 | 1.491746359 | 1.73E-06     | Os04g0584700 | -2.953612397 | 0.045038631 | Os01g0606900 | 3.050382158 | 1.68E-194   | Os11g0127800  | -1.514315938 | 5.75E-14    |
| Os09g0546900 | 1.490349247 | 6.38E-06     | Os09g0425200 | -2.953612397 | 0.045038631 | Os10g0467000 | 3.044890547 | 5.22E-15    | Os10g0557600  | -1.513623415 | 5.17E-35    |
| Os07g0468100 | 1.490142258 | 3.42E-24     | Os04g0321100 | -2.952854194 | 0.045038631 | Os02g0251900 | 3.041227986 | 0.032592904 | Os05g0177900  | -1.511959903 | 0.005002313 |
| Os06g0487620 | 1.489846681 | 0.015240821  | Os07g0489100 | -2.94662369  | 0.001718732 | Os07g0512150 | 3.038301556 | 0.032592904 | Os02g0280700  | -1.509733524 | 3.86E-10    |
| Os02g0575500 | 1.487288977 | 4.32E-113    | Os07g0543100 | -2.944882953 | 0.009148251 | Os08g0369800 | 3.037549371 | 0.000435283 | Os06g0114000  | -1.506959946 | 3.60E-105   |
| Os10g0357800 | 1.486438785 | 1.28E-75     | Os12g0549800 | -2.944790111 | 0.045038631 | Os02g0790500 | 3.037269387 | 0           | Os07g0689600  | -1.504355585 | 3.38E-11    |
| Os02g0802500 | 1.484867671 | 2.82E-07     | Os03g0156300 | -2.936815959 | 0.009148251 | Os07g0546200 | 3.032449497 | 0.001993119 | Os12g0189300  | -1.503308257 | 6.63E-25    |
| Os07g0655600 | 1.483224028 | 0.000484597  | Os04g0112766 | -2.927672717 | 0.045038631 | Os06g0732000 | 3.027944708 | 4.02E-18    | Os07g0510500  | -1.501068327 | 0.011745256 |
| Os06g0665500 | 1.482591116 | 8.95E-105    | Os10g0416800 | -2.923919376 | 1.44E-61    | Os04g0559550 | 3.024451043 | 2.24E-07    | Os06g0187050  | -1.500665099 | 5.22E-31    |
| Os04g0494100 | 1.482390101 | 6.36E-07     | Os02g0527500 | -2.919822034 | 0.001202914 | Os05g0407550 | 3.017577739 | 0.005018952 | Os02g0285300  | -1.499340052 | 5.60E-164   |
| Os02g0720450 | 1.482229827 | 2.41E-05     | Os06g0235900 | -2.919227614 | 1.48E-08    | Os06g0613200 | 3.013799149 | 3.66E-06    | Os03g0360600  | -1.498535964 | 2.48E-18    |
| Os03g0244200 | 1.481272741 | 5.88E-171    | Os03g0233300 | -2.919110668 | 0.00578988  | Os07g0472100 | 3.012906261 | 1.87E-20    | Os09g0135100  | -1.498089499 | 0.000687587 |
| Os03g0392000 | 1.480894713 | 0.001544991  | Os02g0159900 | -2.919064973 | 0.002719009 | Os06g0126050 | 3.010023076 | 0.001183773 | Os06g0567900  | -1.492133099 | 0.000111358 |
| Os03g0150600 | 1.480230472 | 1.15E-63     | Os05g0350900 | -2.918932952 | 0.005788549 | Os06g0293500 | 3.008324079 | 0.032592904 | Os01g0201500  | -1.491789924 | 0.021054757 |
| Os06g0114650 | 1.478721473 | 0.036897769  | Os10g0374200 | -2.917992476 | 0.000613421 | Os03g0402200 | 3.006601193 | 0.017957794 | Os02g0699300  | -1.490937378 | 5.99E-36    |
| Os02g0555300 | 1.474021283 | 5.74E-18     | Os03g0808500 | -2.91610003  | 7.65E-16    | Os05g0386700 | 3.006509487 | 1.76E-09    | Os09g0347500  | -1.488622772 | 3.84E-204   |
| Os08g0213400 | 1.471345443 | 1.07E-62     | Os05g0533301 | -2.915969201 | 0.001827482 | Os01g0939800 | 2.996207962 | 4.43E-18    | Os06g0488050  | -1.487659059 | 0.047133505 |
| Os02g0600200 | 1.470026511 | 6.81E-108    | Os01g0198900 | -2.915838301 | 3.55E-44    | Os01g0756700 | 2.995877412 | 0.001843654 | Os12g0235650  | -1.487652879 | 1.13E-07    |
| Os05g0161200 | 1.468814071 | 2.58E-69     | Os12g0481000 | -2.91344364  | 0.004513037 | Os03g0182800 | 2.994916545 | 2.95E-05    | Os05g0536200  | -1.487643577 | 3.91E-223   |
| Os05g0596000 | 1.468804411 | 0.006227705  | Os11g0490100 | -2.911987817 | 8.48E-33    | Os04g0439400 | 2.993250306 | 8.44E-19    | Os04g0107600  | -1.481005354 | 0.001758175 |
| Os03g0844301 | 1.468119364 | 4.64E-10     | Os05g0573400 | -2.908099838 | 0.00569089  | Os01g0164900 | 2.989134835 | 2.44E-13    | Os03g0158200  | -1.480907162 | 9.90E-135   |
| Os09g0479400 | 1.467650916 | 1.39E-22     | Os03g0566500 | -2.90202762  | 1.70E-13    | Os11g0226966 | 2.988551029 | 0.032592904 | Os01g0209700  | -1.479828211 | 3.27E-39    |
| Os02g0490500 | 1.467043019 | 1.77E-06     | Os03g0314500 | -2.900871261 | 0.045038631 | Os09g0243200 | 2.984021125 | 0.032592904 | Os01g0875000  | -1.474935981 | 3.89E-20    |
| Os12g0470000 | 1.460459866 | 9.60E-10     | Os03g0385100 | -2.900199915 | 0.045038631 | Os02g0740600 | 2.983591166 | 0.007987954 | Os05g0365600  | -1.4746865   | 5.41E-13    |
| Os02g0236600 | 1.460194687 | 2.20E-20     | Os02g0513100 | -2.896755792 | 8.56E-77    | Os09g0130901 | 2.976048148 | 8.15E-34    | Os05g0476000  | -1.472976881 | 0.000982577 |
| Os01g0698900 | 1.459760058 | 9.78E-18     | Os01g0822800 | -2.894386381 | 2.75E       |              |             |             |               |              |             |

|              |             |             |              |              |             |              |             |              |              |              |             |
|--------------|-------------|-------------|--------------|--------------|-------------|--------------|-------------|--------------|--------------|--------------|-------------|
| Os04g0523100 | 1.450914761 | 6.50E-10    | Os06g0229000 | -2.882687484 | 0.045038631 | Os12g0500500 | 2.958458076 | 0.032592904  | Os05g0490600 | -1.467328228 | 0.004098777 |
| Os06g0155500 | 1.449274057 | 3.85E-07    | Os05g0219300 | -2.879059436 | 0.045038631 | Os02g0113300 | 2.956687969 | 0.017957794  | Os07g0551700 | -1.467084189 | 0.005430106 |
| Os08g0356700 | 1.448111188 | 1.94E-05    | Os04g0458600 | -2.878821825 | 0.045038631 | Os03g0823400 | 2.949728806 | 4.00E-307    | Os03g0810500 | -1.461205852 | 0.000163606 |
| Os07g0220466 | 1.447886669 | 0.038870257 | Os05g0384300 | -2.877543909 | 0.043741834 | Os03g0102333 | 2.949255933 | 8.53E-34     | Os10g0147400 | -1.46058434  | 1.92E-163   |
| Os12g0552400 | 1.4464762   | 4.04E-19    | Os05g0531600 | -2.877314086 | 0.043741834 | Os12g0575300 | 2.948007495 | 0.00926081   | Os02g0757100 | -1.458999917 | 2.42E-121   |
| Os02g0211200 | 1.444629265 | 1.43E-06    | Os10g0150000 | -2.875941161 | 0.015731513 | Os07g0410300 | 2.945891732 | 0.000315349  | Os01g0943800 | -1.45873303  | 0.002824784 |
| Os08g0520700 | 1.44442899  | 3.61E-121   | Os04g0348800 | -2.873072404 | 0.011841405 | Os07g0116800 | 2.945034388 | 0.045339093  | Os02g0644100 | -1.458152197 | 5.34E-231   |
| Os01g0816100 | 1.444318298 | 2.19E-36    | Os01g0555100 | -2.871758312 | 0.045038631 | Os12g0568700 | 2.942681533 | 0.01953485   | Os11g0155500 | -1.457620414 | 0.02040537  |
| Os09g0134400 | 1.443923851 | 4.68E-105   | Os10g0528900 | -2.868773564 | 0.045038631 | Os03g0836800 | 2.942415931 | 0.022613143  | Os03g0835900 | -1.456330846 | 1.83E-145   |
| Os05g0447800 | 1.443206881 | 2.77E-08    | Os07g0620700 | -2.863455384 | 0.043819905 | Os09g0425200 | 2.942041928 | 0.045339093  | Os06g0284900 | -1.456214551 | 0.014571512 |
| Os03g0791800 | 1.439622624 | 2.47E-245   | Os01g0316100 | -2.863274098 | 0.001939835 | Os02g0212975 | 2.938012751 | 3.10E-31     | Os02g0265200 | -1.456130914 | 3.38E-05    |
| Os01g0159000 | 1.439171902 | 7.62E-22    | Os04g0319800 | -2.862808711 | 0.011841405 | Os06g0634000 | 2.935510194 | 1.21E-08     | Os08g0554050 | -1.454274729 | 1.42E-94    |
| Os06g0143000 | 1.437612181 | 2.74E-161   | Os11g0420200 | -2.861708807 | 0.045038631 | Os03g0400901 | 2.934810634 | 4.17E-06     | Os10g0154700 | -1.454218188 | 2.29E-12    |
| Os09g0488700 | 1.437401102 | 0.000132366 | Os07g0524900 | -2.861459283 | 9.93E-07    | Os01g0174500 | 2.934064003 | 0.045339093  | Os05g0501700 | -1.453253363 | 2.25E-127   |
| Os07g0553700 | 1.436981779 | 4.22E-17    | Os05g0135200 | -2.859181282 | 0.027719964 | Os01g0971000 | 2.932455951 | 1.45E-14     | Os08g0525600 | -1.45288885  | 3.36E-143   |
| Os10g0151366 | 1.436457492 | 7.72E-07    | Os05g0538250 | -2.856018265 | 0.045038631 | Os07g0650200 | 2.928476457 | 0.013279698  | Os09g0451500 | -1.45151448  | 4.17E-183   |
| Os06g0650700 | 1.435318547 | 9.28E-13    | Os05g0387300 | -2.854605488 | 0.045038631 | Os07g0471050 | 2.923968057 | 3.96E-05     | Os10g0396300 | -1.448915323 | 2.29E-05    |
| Os01g0813800 | 1.435108183 | 0.008627462 | Os07g0670200 | -2.85328253  | 1.08E-10    | Os07g0283600 | 2.922334643 | 0.005026327  | Os12g0125800 | -1.44844294  | 1.09E-10    |
| Os01g0846900 | 1.435106029 | 0.03683678  | Os06g0218300 | -2.849193253 | 0.011841405 | Os05g0478000 | 2.922224642 | 3.77E-06     | Os09g0567500 | -1.4483891   | 3.83E-15    |
| Os06g0286700 | 1.433574766 | 2.71E-09    | Os01g0871800 | -2.847894618 | 0.000398527 | Os03g0643433 | 2.91229847  | 0.009491624  | Os10g0337700 | -1.44748562  | 8.18E-17    |
| Os11g0629566 | 1.431354682 | 2.08E-05    | Os01g0383001 | -2.845718925 | 0.008169496 | Os07g0484800 | 2.911762242 | 0.045339093  | Os01g0338150 | -1.445459    | 5.98E-106   |
| Os01g0699600 | 1.430722116 | 8.17E-06    | Os03g0345300 | -2.844939923 | 0.012961347 | Os08g0402800 | 2.908960807 | 4.83E-14     | Os01g0282800 | -1.44404987  | 9.19E-253   |
| Os04g0300600 | 1.429367706 | 4.65E-11    | Os12g0610800 | -2.838972898 | 0.002203691 | Os11g0689500 | 2.90565474  | 2.20E-06     | Os01g0918400 | -1.444043735 | 2.42E-28    |
| Os03g0103800 | 1.429115868 | 8.03E-167   | Os10g0534900 | -2.836821676 | 0.000334985 | Os04g0652500 | 2.905432335 | 0.045339093  | Os10g0566700 | -1.442775096 | 1.64E-62    |
| Os02g0203300 | 1.428553988 | 0.028633871 | Os10g0539700 | -2.834697105 | 0.002129331 | Os09g0437500 | 2.90237791  | 0            | Os01g0892600 | -1.440370013 | 1.91E-25    |
| Os07g0166500 | 1.428103756 | 0.000653453 | Os03g0844800 | -2.833004335 | 0.011841405 | Os09g0278300 | 2.899531613 | 0.004721724  | Os04g0316200 | -1.438969302 | 0.045088487 |
| Os03g0678800 | 1.426955302 | 4.76E-18    | Os07g0583300 | -2.832805888 | 0.001464638 | Os07g0529600 | 2.8988062   | 0            | Os01g0611100 | -1.438605724 | 4.18E-83    |
| Os10g0450800 | 1.425633337 | 2.73E-08    | Os04g0419100 | -2.82978316  | 0.000159715 | Os07g0241500 | 2.898289869 | 0.022613143  | Os03g0709000 | -1.436633119 | 2.53E-116   |
| Os04g0550200 | 1.425030835 | 5.07E-48    | Os03g0596101 | -2.828797462 | 0.004098852 | Os04g0598800 | 2.893642614 | 0.000154901  | Os09g0467400 | -1.436052647 | 0.000132425 |
| Os10g0517050 | 1.424610955 | 5.90E-135   | Os09g0426800 | -2.827960096 | 2.66E-10    | Os02g0609800 | 2.891160385 | 1.65E-20     | Os04g0685200 | -1.435551561 | 1.59E-101   |
| Os06g0238700 | 1.423945985 | 0.000140297 | Os07g0588600 | -2.822233461 | 0.009392856 | Os12g0194266 | 2.888025906 | 1.29E-07     | Os06g0696400 | -1.433668373 | 9.68E-11    |
| Os02g0651200 | 1.419425849 | 7.97E-31    | Os09g0487150 | -2.821099332 | 0.011841405 | Os11g0269700 | 2.886452745 | 1.86E-09     | Os06g0251700 | -1.431130535 | 4.33E-06    |
| Os07g0640600 | 1.419270502 | 3.83E-07    | Os05g0362600 | -2.81761999  | 0.015408635 | Os02g0684400 | 2.885251743 | 2.54E-270    | Os05g0399400 | -1.430241869 | 0.009594424 |
| Os07g0566150 | 1.418884398 | 0.003249412 | Os10g0395000 | -2.810993852 | 0.012433781 | Os02g0613300 | 2.880608564 | 0.004042479  | Os09g0457700 | -1.425648617 | 1.17E-05    |
| Os07g0671901 | 1.418196078 | 0.00098845  | Os05g0103800 | -2.800766718 | 3.45E-07    | Os08g0552700 | 2.880352472 | 0.007269841  | Os03g0695425 | -1.424728518 | 9.43E-181   |
| Os02g0326700 | 1.417387985 | 2.09E-16    | Os03g0801000 | -2.798229585 | 0.000463681 | Os02g0541300 | 2.877992689 | 1.04E-08     | Os07g0148900 | -1.423386831 | 2.90E-100   |
| Os05g0491200 | 1.417306829 | 4.53E-196   | Os04g0675400 | -2.798150151 | 9.55E-37    | Os05g0449200 | 2.869703918 | 3.20E-67     | Os10g0116300 | -1.423147096 | 3.28E-12    |
| Os09g0387150 | 1.415061383 | 2.09E-103   | Os02g0795666 | -2.796887374 | 1.99E-05    | Os12g0617250 | 2.86819346  | 1.11E-09     | Os06g0177000 | -1.422302414 | 2.22E-06    |
| Os09g0419100 | 1.414655642 | 1.25E-67    | Os11g0451700 | -2.785813245 | 1.16E-20    | Os12g0617400 | 2.864784983 | 1.07E-50     | Os03g0366800 | -1.422124653 | 1.35E-75    |
| Os04g0668700 | 1.413587048 | 1.10E-242   | Os03g0347500 | -2.785257596 | 0.035227485 | Os04g0469425 | 2.863476239 | 0.001541454  | Os02g0117600 | -1.420218643 | 5.80E-13    |
| Os02g0136150 | 1.412928861 | 3.32E-36    | Os09g0567900 | -2.783689572 | 3.34E-18    | Os01g0937600 | 2.862051454 | 0.045339093  | Os06g0507200 | -1.419989085 | 0.008697862 |
| Os02g0579000 | 1.411298041 | 1.81E-10    | Os05g0366800 | -2.781592055 | 0.003215171 | Os02g0764700 | 2.860897271 | 3.44E-06     | Os09g0491772 | -1.41961651  | 6.03E-88    |
| Os02g0611200 | 1.409819885 | 0.000457981 | Os10g0118800 | -2.780194235 | 5.84E-20    | Os03g0258200 | 2.860568312 | 5.91E-69     | Os08g0503200 | -1.418887004 | 5.71E-136   |
| Os11g0302800 | 1.409265933 | 1.60E-51    | Os12g0621400 | -2.779176799 | 0.011020014 | Os08g0484633 | 2.854578631 | 3.00E-08     | Os01g0949500 | -1.418665702 | 4.16E-93    |
| Os01g0680500 | 1.409239276 | 0.012583214 | Os07g0413300 | -2.777188038 | 8.93E-50    | Os05g0344200 | 2.854245878 | 0            | Os04g0586200 | -1.416916693 | 2.04E-216   |
| Os09g0563700 | 1.408390972 | 2.76E-65    | Os03g0280750 | -2.77360008  | 6.09E-42    | Os01g0744350 | 2.852646943 | 0.045339093  | Os01g0596600 | -1.416807759 | 0.032488188 |
| Os11g0303200 | 1.407486368 | 1.28E-111   | Os01g0644200 | -2.772523006 | 0.015408635 | Os03g0421700 | 2.852323558 | 0.0025777073 | Os02g0303500 | -1.415302422 | 6.44E-05    |
| Os06g0729500 | 1.403277477 | 2.87E-199   | Os04g0273900 | -2.765854316 | 0.02576738  | Os06g0717600 | 2.851415831 | 2.36E-62     | Os04g0505400 | -1.414517111 | 0.048316576 |
| Os04g0494950 | 1.402833491 | 0.010931379 | Os03g0377100 | -2.764807856 | 0.015809415 | Os03g0427300 | 2.850924606 | 0.045339093  | Os04g0599400 | -1.414464496 | 1.75E-195   |
| Os01g0723400 | 1.402561276 | 1.50E-235   | Os05g0493100 | -2.759405192 | 0.011917778 | Os08g0480400 | 2.85011428  | 0.012247752  | Os07g0644300 | -1.413756893 | 5.63E-10    |
| Os07g0663800 | 1.402396791 | 8.91E-06    | Os01g0594500 | -2.759143486 | 2.63E-05    | Os06g0163100 | 2.847953021 | 0.000392756  | Os12g0156000 | -1.41360598  | 2.08E-24    |
| Os07g0576550 | 1.398402273 | 9.96E-10    | Os01g0254850 | -2.756503006 | 0.020069108 | Os02g0703300 | 2.847628127 | 1.08E-33     | Os03g0366000 | -1.412928187 | 2.39E-137   |
| Os08g0497600 | 1.398336946 | 3.72E-86    | Os03g0845300 | -2.755170992 | 5.35E-17    | Os07g0535100 | 2.846389909 | 0.043946507  | Os04g0208500 | -1.411265287 | 2.70E-28    |
| Os03g0226300 | 1.397710725 | 2.60E-13    | Os07g0184200 | -2.75318613  | 8.27E-09    | Os08g0501000 | 2.839450449 | 0.001201744  | Os03g0314750 | -1.410873246 | 7.52E-82    |
| Os02g0809800 | 1.394200954 | 4.94E-23    | Os05g0411100 | -2.750325485 | 0.004397118 | Os09g0459700 | 2.835616291 | 0.043141837  | Os08g0429800 | -1.406930279 | 9.13E-05    |
| Os09g0554000 | 1.393431839 | 3.18E-15    | Os04g0446600 | -2.745621633 | 0.000636955 | Os01g0649400 | 2.835116637 | 0.045339093  | Os03g0859900 | -1.406446408 | 0.014299162 |
| Os06g0681600 | 1.393280555 | 4.90E-35    | Os05g0582000 | -2.74520809  | 0.015408635 | Os05g0457200 | 2.834441818 | 2.56E-20     | Os03g0667100 | -1.405242057 | 9.61E-39    |
| Os04g0625350 | 1.390951204 | 0.02693996  | Os12g0112000 | -2.738569027 | 3.87E-07    | Os07g0604550 | 2.832464473 | 8.13E-18     | Os05g0181000 | -1.404883799 | 8.55E-149   |
| Os09g0478000 | 1.390336536 | 8.55E-12    | Os11g0599101 | -2.73712457  | 0.000622609 | Os02g0824000 | 2.831228135 | 6.05E-45     | Os01g0765600 | -1.404027108 | 3.14E-33    |
| Os03g0745400 | 1.389819626 | 1.90E-105   | Os03g0653900 | -2.721683208 | 4.26E-80    | Os10g0136400 | 2.829075729 | 0.045339093  | Os08g0427550 | -1.403247241 | 0.000356146 |
| Os05g0414600 | 1.388123713 | 3.22E-94    | BAC19887     | -2.721601938 | 0.020069108 | Os09g0415050 | 2.827418486 | 5.03E-20     | Os12g0156866 | -1.402967687 | 0.007158985 |
| Os02g0593500 | 1.388058546 | 1.43E-12    | Os05g0368100 | -2.719852498 | 0.017687554 | Os02g0704933 | 2.824700774 | 0.000380898  | Os12g0260500 | -1.399354968 | 0.000131952 |
| Os01g0962100 | 1.386860192 | 4.13E-129   | Os02g0214900 | -2.719549012 | 0.004065956 | Os07g0683200 | 2.823394652 | 1.56E-12     | Os12g0190000 | -1.398423193 | 2.94E-190   |
| Os01g0705400 | 1.386192079 | 7.06E-11    | Os08g0520600 | -2.71837187  | 4.49E-13    | Os02g0182100 | 2.822668976 | 9.12E-05     | Os12g0514500 | -1.398353697 | 2.64E-262   |
| Os08g0486500 | 1.385712024 | 0.007518243 | Os08g0542800 | -2.716447742 | 0.002063575 | Os01g0866500 | 2.821279201 | 1.05E-20     | Os03g0143400 | -1.397189107 | 1.23E-214   |
| Os01g0850900 |             |             |              |              |             |              |             |              |              |              |             |

|              |              |             |              |              |             |              |             |             |              |              |             |
|--------------|--------------|-------------|--------------|--------------|-------------|--------------|-------------|-------------|--------------|--------------|-------------|
| Os09g0520700 | 1.381670123  | 3.42E-255   | Os01g0907200 | -2.695334484 | 1.12E-41    | Os02g0699836 | 2.811933321 | 0.017492098 | Os06g0204100 | -1.390149279 | 0.027640454 |
| Os08g0432000 | 1.380251564  | 1.25E-51    | Os09g0445801 | -2.694007294 | 0.011878847 | Os09g0513500 | 2.811619874 | 1.25E-16    | Os05g0207300 | -1.388187617 | 5.16E-57    |
| Os07g0529800 | 1.379194622  | 2.05E-170   | Os04g0329500 | -2.690343641 | 5.16E-05    | Os09g0424650 | 2.806989341 | 0.015623538 | Os03g0400200 | -1.38694678  | 1.68E-07    |
| Os10g0204300 | 1.377890418  | 2.69E-98    | Os12g0457500 | -2.689286517 | 3.32E-25    | Os06g0292400 | 2.806747107 | 4.40E-15    | Os12g0198700 | -1.38659567  | 3.90E-07    |
| Os04g0550600 | 1.376922985  | 1.21E-24    | Os07g0625600 | -2.686578884 | 3.68E-06    | Os12g0610800 | 2.805095359 | 0.004455905 | Os03g0670200 | -1.38321176  | 2.96E-14    |
| Os03g0418000 | 1.376073139  | 6.68E-06    | Os08g0248700 | -2.683666887 | 3.29E-11    | Os10g0535600 | 2.804792994 | 0.005915373 | Os07g0523500 | -1.383184047 | 0.017567116 |
| Os10g0403000 | 1.376057512  | 9.17E-12    | Os07g0132800 | -2.682914477 | 2.53E-05    | Os05g0499100 | 2.804163742 | 1.80E-25    | Os04g0136700 | -1.381867858 | 2.80E-109   |
| Os06g0168700 | 1.375341635  | 1.71E-78    | Os08g0225400 | -2.680410604 | 0.000149479 | Os02g0617500 | 2.803843239 | 1.27E-19    | Os05g0201700 | -1.381150812 | 8.45E-07    |
| Os04g0120100 | 1.373485295  | 0.021916997 | Os09g0357250 | -2.679342377 | 3.70E-06    | Os12g0211500 | 2.802202084 | 1.03E-13    | Os05g0401500 | -1.380239993 | 1.78E-114   |
| Os07g0201500 | 1.373179633  | 8.98E-05    | Os03g0277300 | -2.67823893  | 8.49E-12    | Os04g0423400 | 2.801874708 | 1.42E-07    | Os04g0486600 | -1.376548956 | 6.30E-165   |
| Os01g0510901 | 1.373089232  | 0.004106094 | Os11g0488900 | -2.678156213 | 2.89E-05    | Os08g0205800 | 2.798280313 | 4.27E-43    | Os01g0152800 | -1.375627247 | 0.001299264 |
| Os05g0311500 | 1.373082355  | 2.73E-08    | Os03g0576600 | -2.677575969 | 3.05E-05    | Os03g0195100 | 2.797983998 | 0.0006114   | Os11g0687100 | -1.375590786 | 8.35E-56    |
| Os11g0699532 | 1.372970029  | 1.51E-14    | Os11g0460500 | -2.673708458 | 0.000342257 | Os10g0116000 | 2.797108813 | 7.03E-45    | Os09g0115400 | -1.37394387  | 2.86E-219   |
| Os02g0183900 | 1.371809131  | 1.39E-16    | Os07g0120100 | -2.671679669 | 0.000120894 | Os07g0587300 | 2.796337537 | 0.024632248 | Os09g0482860 | -1.37128999  | 0.007013796 |
| Os06g0155400 | 1.371552775  | 0.004575798 | Os10g0519500 | -2.668996444 | 0.004233057 | Os04g0607150 | 2.792382511 | 0.006813661 | Os02g0629200 | -1.370202477 | 6.03E-05    |
| Os01g0905200 | 1.371235894  | 0.003410636 | Os01g0514700 | -2.664610700 | 0.003264696 | Os02g0320700 | 2.785411313 | 0.005986111 | Os01g0839700 | -1.370051137 | 0.038633496 |
| Os03g0641300 | 1.367793823  | 0.01948155  | Os09g0278700 | -2.662789876 | 1.07E-05    | Os04g0490000 | 2.784424941 | 0.000108168 | Os01g0935200 | -1.369764034 | 7.43E-37    |
| Os03g0168100 | 1.367260666  | 0.001064044 | Os02g0235900 | -2.660685996 | 0.001139845 | Os09g0569800 | 2.781938538 | 4.43E-07    | Os04g0115800 | -1.368774768 | 7.24E-14    |
| Os01g0846700 | 1.367170816  | 7.52E-30    | Os09g0565300 | -2.657489054 | 5.58E-06    | Os10g0412050 | 2.78118723  | 1.22E-19    | Os10g0493300 | -1.368108538 | 3.87E-160   |
| Os10g0437500 | 1.366996654  | 1.34E-16    | Os01g0812100 | -2.65655494  | 0.044942034 | Os01g0597400 | 2.779326684 | 0.013019202 | Os03g0401300 | -1.366643316 | 4.29E-171   |
| Os02g0608550 | 1.365471984  | 4.82E-23    | Os09g0378700 | -2.656087909 | 0.001937635 | Os04g0529100 | 2.774018177 | 4.64E-45    | Os03g0645200 | -1.365002176 | 4.93E-13    |
| Os02g0106001 | 1.365020644  | 4.07E-05    | Os02g0526650 | -2.655748104 | 7.24E-05    | Os01g0332100 | 2.770820121 | 0           | Os02g0200900 | -1.364073009 | 2.85E-94    |
| Os01g0198100 | 1.364572691  | 3.09E-31    | Os02g0767000 | -2.653966339 | 4.23E-07    | Os03g0596700 | 2.770566122 | 0.015855223 | Os05g0208500 | -1.363167381 | 4.62E-131   |
| Os06g0704700 | 1.364147642  | 5.32E-16    | Os08g0170400 | -2.653753685 | 6.35E-06    | Os01g0584032 | 2.768613523 | 0.000370037 | Os04g0128900 | -1.362320277 | 1.74E-13    |
| Os01g0783200 | 1.362931368  | 9.46E-232   | Os06g0659400 | -2.653636084 | 0.001141311 | Os04g0650416 | 2.76821743  | 1.95E-07    | Os03g0180900 | -1.360696288 | 0.004710511 |
| Os02g0830200 | 1.362722063  | 9.01E-11    | Os02g0617400 | -2.65256403  | 2.61E-63    | Os05g0563100 | 2.76531429  | 7.95E-37    | Os01g0183300 | -1.359707948 | 3.21E-05    |
| Os01g0846800 | 1.360040747  | 0.015327596 | Os01g0583300 | -2.652351207 | 5.24E-87    | Os08g0536200 | 2.764254676 | 0.000129269 | Os02g0469900 | -1.359062075 | 4.18E-22    |
| Os05g0290300 | 1.359525572  | 6.20E-19    | Os10g0155200 | -2.644563827 | 0.000372511 | Os06g0653300 | 2.763068503 | 0.015855223 | Os03g0678400 | -1.358378547 | 2.16E-81    |
| Os01g0908600 | 1.359439418  | 1.92E-07    | Os06g0206900 | -2.64257455  | 0.000259089 | Os01g0364100 | 2.75221471  | 1.26E-11    | Os09g0296800 | -1.35799191  | 5.75E-42    |
| Os04g0639200 | 1.359208438  | 1.56E-12    | Os09g0526700 | -2.639288473 | 3.66E-44    | Os02g0696650 | 2.751663048 | 2.55E-26    | Os07g0671901 | -1.357643389 | 0.000199251 |
| Os03g0131200 | 1.357915868  | 5.38E-12    | Os02g0308400 | -2.636936789 | 1.89E-05    | Os01g0916950 | 2.747479002 | 3.29E-05    | Os01g0891033 | -1.357624985 | 0.000936035 |
| Os09g0306566 | 1.35755099   | 0.000200306 | Os02g0639300 | -2.635586759 | 7.98E-05    | Os07g0193701 | 2.745392726 | 0.000634055 | Os01g0296700 | -1.357381108 | 3.16E-05    |
| Os04g0566500 | 1.356958616  | 1.13E-182   | Os01g0666400 | -2.634656179 | 4.22E-06    | Os12g0573600 | 2.745032169 | 9.53E-17    | Os03g0195450 | -1.357209459 | 0.000954786 |
| Os05g0376400 | 1.3567448    | 2.97E-06    | Os04g0642300 | -2.630561728 | 1.07E-29    | Os02g0683500 | 2.742546397 | 0.015880923 | Os03g0761000 | -1.356823024 | 2.58E-167   |
| Os07g0114000 | 1.350967995  | 1.43E-09    | Os06g0133000 | -2.62876038  | 0.000245396 | Os01g0734399 | 2.742329232 | 2.36E-05    | Os06g0683900 | -1.354039754 | 1.67E-68    |
| Os04g0306400 | 1.349880222  | 5.53E-147   | Os04g0577337 | -2.628181417 | 0.016770055 | Os11g0546401 | 2.742187145 | 0.003062452 | Os01g0666600 | -1.353715692 | 1.32E-07    |
| Os07g0190600 | 1.349248038  | 9.21E-25    | Os06g0237400 | -2.627238715 | 2.54E-05    | Os08g0520900 | 2.737351679 | 4.92E-178   | Os07g0133500 | -1.353578874 | 1.41E-14    |
| Os08g0278750 | 1.34919698   | 3.07E-06    | Os06g0725500 | -2.625904388 | 0.004308793 | Os03g0759600 | 2.736182913 | 1.83E-10    | Os05g0282900 | -1.353410269 | 4.71E-08    |
| Os08g0553750 | 1.348531999  | 0.000183138 | Os10g0513400 | -2.623176267 | 0.000830912 | Os03g0181100 | 2.727504868 | 3.39E-30    | Os02g0689000 | -1.352777156 | 0.012187717 |
| Os01g0944700 | 1.347393271  | 0.002874483 | Os09g0513200 | -2.621107547 | 0.006279489 | Os02g0624700 | 2.727140029 | 0.000771671 | Os01g0201250 | -1.352438316 | 8.89E-78    |
| Os03g0650900 | 1.347074187  | 9.04E-62    | Os11g0168000 | -2.617571675 | 0.015581319 | Os05g0577500 | 2.726897068 | 7.95E-09    | Os10g0567400 | -1.351968538 | 1.33E-104   |
| Os01g0721400 | 1.345822303  | 1.84E-12    | Os11g0464700 | -2.617020737 | 0.00690634  | Os05g0429900 | 2.724488054 | 1.49E-23    | Os11g0149200 | -1.349738126 | 7.45E-09    |
| Os02g0610500 | 1.345412245  | 3.13E-80    | Os01g0710100 | -2.615299913 | 1.13E-53    | Os01g0175100 | 2.724342522 | 2.54E-107   | Os07g0687700 | -1.349535305 | 9.04E-170   |
| Os01g0182832 | 1.345351338  | 9.06E-09    | Os05g0162000 | -2.615090653 | 1.31E-05    | Os09g0327200 | 2.724055781 | 5.24E-29    | Os01g0251400 | -1.349376413 | 4.16E-121   |
| Os11g0444700 | 1.344462863  | 2.00E-130   | Os07g0633300 | -2.616727639 | 0.016727639 | Os08g0434566 | 2.721157103 | 8.91E-10    | Os06g0593100 | -1.344576513 | 5.56E-90    |
| Os09g0551500 | 1.344264923  | 0.002404198 | Os12g0117100 | -2.590152354 | 2.25E-07    | Os05g0215300 | 2.718450733 | 2.25E-09    | Os03g0294600 | -1.344119917 | 2.89E-12    |
| Os03g0324200 | 1.343366588  | 2.29E-35    | Os08g0390200 | -2.585950577 | 6.80E-46    | Os11g0652600 | 2.716894365 | 0.000773144 | Os12g0138500 | -1.344100325 | 2.51E-15    |
| Os02g0510200 | 1.343294041  | 3.47E-179   | Os01g0778500 | -2.585870945 | 3.36E-06    | Os08g0431900 | 2.715886695 | 0.0457146   | Os05g0409500 | -1.343937136 | 6.50E-15    |
| Os02g0681000 | 1.343059243  | 4.46E-77    | Os02g0796100 | -2.581143263 | 1.03E-07    | Os01g0968600 | 2.713636345 | 8.70E-41    | Os03g0265600 | -1.343685714 | 3.10E-125   |
| Os07g0621400 | 1.341962089  | 7.35E-68    | Os03g0764550 | -2.578637065 | 0.002343024 | Os10g0184250 | 2.711817956 | 1.73E-08    | Os10g0377000 | -1.343583224 | 1.17E-09    |
| Os11g0532200 | 1.341657402  | 1.37E-130   | Os03g0805800 | -2.573140265 | 0.004070713 | Os07g0212400 | 2.71020941  | 7.93E-07    | Os06g0474500 | -1.34274546  | 7.53E-106   |
| Os01g0226400 | 1.34019717   | 0.005641785 | Os04g0445100 | -2.572562522 | 0.001550345 | Os05g0202500 | 2.70802555  | 0           | Os02g0786900 | -1.34247244  | 4.51E-33    |
| Os10g0370500 | 1.340073852  | 1.76E-16    | Os03g0766600 | -2.571882124 | 0.026302894 | Os01g0934350 | 2.702745018 | 0.000104434 | Os08g0438100 | -1.341356294 | 8.94E-07    |
| Os04g0689000 | 1.338213893  | 3.66E-77    | Os06g0320200 | -2.568275157 | 0.0277572   | Os12g0211301 | 2.70182594  | 1.54E-05    | Os07g0246200 | -1.340757843 | 2.35E-183   |
| Os01g0382700 | 1.338088355  | 2.56E-53    | Os05g0496100 | -2.565297288 | 0.008373915 | BAC19867     | 2.701294886 | 0.003703516 | Os05g0202300 | -1.340585783 | 0.000241127 |
| Os04g0546800 | 1.337234456  | 2.19E-79    | Os06g0148900 | -2.55907312  | 0.004629551 | Os01g0248850 | 2.701178135 | 0.009225698 | Os03g0105600 | -1.339944757 | 2.65E-141   |
| Os03g0610800 | 1.336755433  | 0.006171068 | Os06g0483900 | -2.55363269  | 2.55E-56    | Os02g0616600 | 2.700530164 | 6.81E-06    | Os05g0208550 | -1.339233512 | 5.14E-72    |
| Os04g0535200 | 1.336326547  | 3.11E-106   | Os01g0287400 | -2.551686241 | 1.36E-08    | Os07g0549100 | 2.700080549 | 0.000925933 | Os01g0850000 | -1.339166932 | 1.17E-57    |
| Os01g0971000 | 1.335986894  | 9.61E-12    | Os11g0219400 | -2.546422055 | 0.001028636 | Os05g0163900 | 2.696035672 | 0.014691367 | Os05g0446900 | -1.338530189 | 2.19E-121   |
| Os01g0109000 | 1.333466512  | 2.13E-41    | Os05g0421600 | -2.543807347 | 1.18E-18    | Os03g0666600 | 2.691091537 | 5.15E-08    | Os04g0462500 | -1.338343874 | 1.08E-104   |
| Os05g0437800 | 1.332821668  | 1.88E-23    | Os02g0580000 | -2.543723197 | 0.003717553 | Os07g0616100 | 2.689508718 | 1.67E-10    | Os01g0954900 | -1.338204848 | 3.70E-34    |
| Os12g0428700 | 1.3324424154 | 2.60E-19    | Os11g0592375 | -2.541154086 | 0.015376831 | Os04g0480802 | 2.689446045 | 0.003352287 | Os06g0131700 | -1.337498612 | 0.009997091 |
| Os12g0495525 | 1.332205022  | 3.36E-77    | Os03g0790700 | -2.537118094 | 8.42E-08    | Os04g0419900 | 2.687857981 | 8.76E-06    | Os07g0633200 | -1.336935914 | 9.55E-103   |
| Os11g0251400 | 1.33214091   | 4.36E-184   | Os04g0526200 | -2.534320571 | 5.33E-89    | Os01g0117450 | 2.685307395 | 0.020609353 | Os01g0716500 | -1.336868564 | 0.000319464 |
| Os01g0507000 | 1.330619307  | 2.63E-149   | Os02g0718600 | -2.53127478  | 1.66E-11    | Os03g0304800 | 2.681980946 | 1.06E-147   | Os09g0248100 | -1.336765993 | 0.00167914  |
| Os05g0355300 | 1.330440917  | 2.62E-33    | Os10g0551700 | -2.530743447 | 1.86E-16    |              |             |             |              |              |             |

|              |             |             |              |              |             |              |             |             |              |              |             |
|--------------|-------------|-------------|--------------|--------------|-------------|--------------|-------------|-------------|--------------|--------------|-------------|
| Os02g0622500 | 1.327412215 | 4.18E-120   | Os06g0116933 | -2.514049575 | 3.98E-09    | Os07g0669000 | 2.668493872 | 0.000232786 | Os03g0735000 | -1.334209568 | 2.03E-05    |
| Os06g0731200 | 1.327343754 | 8.11E-28    | Os02g0189200 | -2.511144794 | 0.000527226 | Os08g0413850 | 2.668036977 | 2.13E-13    | Os07g0582800 | -1.332828155 | 1.75E-85    |
| Os01g0168800 | 1.327317462 | 0.000417546 | Os03g0145600 | -2.510699432 | 8.80E-06    | Os07g0471683 | 2.667657944 | 0.000123531 | Os09g0452800 | -1.332789041 | 0.014493183 |
| Os12g0152500 | 1.326593821 | 9.32E-05    | Os01g0343100 | -2.510539231 | 3.82E-10    | Os07g0631050 | 2.667447494 | 0.020035808 | Os02g0197600 | -1.330678487 | 1.56E-135   |
| Os07g0475700 | 1.324447721 | 1.64E-06    | Os06g0170800 | -2.509780433 | 0.006471235 | Os01g0724450 | 2.666676945 | 0.000369639 | Os05g0364600 | -1.329979416 | 9.27E-145   |
| Os10g0485300 | 1.323715269 | 1.42E-153   | Os08g0460000 | -2.507974548 | 2.03E-110   | Os01g0556800 | 2.666578161 | 1.81E-09    | Os04g0590800 | -1.329749611 | 9.14E-35    |
| Os09g0135100 | 1.321945586 | 0.000201128 | Os11g0200000 | -2.504745861 | 2.84E-09    | Os03g0127950 | 2.665838094 | 3.72E-09    | Os03g0751100 | -1.329689565 | 5.72E-25    |
| Os01g0835600 | 1.320525264 | 5.27E-195   | Os04g0136000 | -2.503023103 | 0.000381279 | Os01g0661601 | 2.662940179 | 1.91E-21    | Os10g0540000 | -1.329311062 | 0.000252197 |
| Os01g0833150 | 1.320283503 | 6.66E-13    | Os06g0243801 | -2.495964559 | 0.010193103 | Os10g0489000 | 2.662349413 | 4.60E-08    | Os01g0584250 | -1.327180666 | 1.42E-09    |
| Os02g0577900 | 1.318726352 | 9.68E-05    | Os07g0274300 | -2.493716635 | 0.001320626 | Os09g0554200 | 2.661509724 | 4.36E-20    | Os05g0155100 | -1.326774986 | 1.24E-155   |
| Os09g0325366 | 1.318654609 | 0.000137379 | Os01g0557200 | -2.493214708 | 0.000159469 | Os08g0553000 | 2.660535993 | 0.020609353 | Os03g0688300 | -1.326231918 | 0.000719526 |
| Os05g0426066 | 1.315274488 | 7.08E-11    | Os02g0131000 | -2.487618988 | 8.83E-26    | Os06g0149166 | 2.659643428 | 1.10E-35    | BAC19894     | -1.326217916 | 0.022002715 |
| Os06g0154400 | 1.315057577 | 2.70E-29    | Os03g0694500 | -2.486037129 | 0.032202326 | Os02g0668500 | 2.654427711 | 2.94E-219   | Os03g0819400 | -1.325959215 | 1.19E-135   |
| Os12g0503000 | 1.314865314 | 9.35E-114   | Os01g0684301 | -2.478362542 | 5.18E-09    | Os12g0206800 | 2.654135686 | 0.00036032  | Os03g0718100 | -1.324028673 | 5.07E-193   |
| Os01g0719100 | 1.313518378 | 1.27E-109   | Os09g0314500 | -2.476241603 | 0.017353676 | Os03g0826900 | 2.653177399 | 0.00291335  | Os05g0155500 | -1.322663014 | 4.17E-210   |
| Os11g0116000 | 1.312518318 | 4.62E-06    | Os01g0591000 | -2.473439043 | 3.45E-42    | Os03g0344650 | 2.652891165 | 0.026870721 | Os10g0377400 | -1.322380407 | 3.09E-185   |
| Os11g0661600 | 1.312051072 | 0.000518899 | Os07g0448100 | -2.47321799  | 0           | Os08g0505250 | 2.650423933 | 0.001402457 | Os01g0283500 | -1.31875339  | 6.59E-39    |
| Os06g0696400 | 1.308926945 | 5.57E-11    | Os06g0351500 | -2.472265697 | 0.000694359 | Os07g0628700 | 2.649969604 | 0.020609353 | Os08g0356700 | -1.318481589 | 0.000771671 |
| Os03g0557900 | 1.305678047 | 3.65E-19    | Os03g0748500 | -2.465199559 | 0.034953395 | Os03g0782950 | 2.644534675 | 0.00021767  | Os06g0119600 | -1.317040209 | 1.05E-38    |
| Os12g0267800 | 1.304665112 | 0.001229311 | Os10g0208600 | -2.463393363 | 0.011885938 | Os03g0820300 | 2.64249266  | 1.09E-06    | Os02g0720900 | -1.316565042 | 0.000193756 |
| Os07g0484401 | 1.302637151 | 0.000100096 | Os05g0177500 | -2.460904261 | 4.17E-06    | Os08g0494350 | 2.640683579 | 3.35E-30    | Os05g0417700 | -1.315223275 | 7.74E-05    |
| Os06g0210000 | 1.301505499 | 1.22E-05    | Os12g0575300 | -2.459552398 | 0.012292735 | Os01g0243901 | 2.640637462 | 1.31E-12    | Os06g0137400 | -1.314858546 | 5.95E-13    |
| Os01g0247600 | 1.300876445 | 1.83E-46    | Os11g0259700 | -2.453066328 | 8.50E-07    | Os07g0653300 | 2.637004869 | 2.19E-08    | Os03g0257600 | -1.314565154 | 0.008183881 |
| Os02g0107300 | 1.300839167 | 0.000200219 | Os08g0544700 | -2.450483216 | 0.045936167 | Os03g0767000 | 2.636975742 | 0.026870721 | Os01g0511000 | -1.314339627 | 3.43E-93    |
| Os09g0475500 | 1.300707828 | 5.17E-22    | Os10g0495433 | -2.447148439 | 0.00184558  | Os02g0818900 | 2.632256675 | 4.27E-05    | Os05g0207500 | -1.313654863 | 6.88E-103   |
| Os11g0614500 | 1.298785711 | 4.82E-12    | Os01g0556800 | -2.446575286 | 9.95E-10    | Os05g0559800 | 2.629129813 | 0.007532395 | Os12g0151600 | -1.313382666 | 0.006274266 |
| Os04g0369100 | 1.297483131 | 0.023506058 | Os02g0729100 | -2.443220365 | 0.009207489 | Os10g0565401 | 2.628686732 | 0.003032331 | Os05g0280200 | -1.311850312 | 0.005682075 |
| Os01g0124200 | 1.2969972   | 3.78E-84    | Os09g0268600 | -2.442364629 | 0.019522899 | Os05g0132000 | 2.627497384 | 7.26E-14    | Os05g0134400 | -1.31154138  | 3.51E-34    |
| Os10g0572000 | 1.296778045 | 4.06E-07    | Os09g0433300 | -2.436560926 | 5.86E-05    | Os11g0126900 | 2.627316438 | 3.93E-32    | Os05g0187800 | -1.310454304 | 1.64E-132   |
| Os04g0636400 | 1.296692529 | 0.000793242 | Os02g0207100 | -2.436277807 | 0.012433781 | Os08g0481100 | 2.617502152 | 2.35E-09    | Os12g0149300 | -1.310109085 | 0.004320356 |
| Os06g0139700 | 1.295214712 | 1.81E-179   | Os06g0136600 | -2.433976967 | 2.75E-31    | Os02g0658000 | 2.615352243 | 4.87E-95    | Os03g0320900 | -1.31008328  | 2.08E-108   |
| Os05g0247100 | 1.292536263 | 2.65E-16    | Os01g0156300 | -2.430713059 | 4.70E-05    | Os09g0309600 | 2.613330737 | 0.026870721 | Os01g0938100 | -1.309474412 | 1.18E-34    |
| Os09g0563800 | 1.292075243 | 6.66E-106   | Os06g0586000 | -2.428377558 | 7.60E-14    | Os05g0426400 | 2.609904842 | 0.001530099 | Os08g0206600 | -1.308220393 | 4.09E-42    |
| Os04g0592500 | 1.289108777 | 8.47E-67    | Os03g0141200 | -2.426398023 | 2.45E-142   | Os03g0231000 | 2.608269046 | 0.000229205 | Os07g0406300 | -1.307041915 | 4.03E-28    |
| Os06g0554600 | 1.286551444 | 0.000242864 | Os01g0718500 | -2.42452061  | 2.33E-06    | Os01g0826400 | 2.603567626 | 3.85E-05    | Os02g0679700 | -1.306425696 | 1.78E-05    |
| Os08g0246400 | 1.28610167  | 2.08E-179   | Os03g0820300 | -2.423334031 | 7.30E-07    | Os07g0479500 | 2.603354657 | 0.043133489 | Os10g0155200 | -1.306116769 | 0.001800433 |
| Os09g0428750 | 1.285066785 | 0.005383364 | Os06g0505700 | -2.422707499 | 2.58E-181   | Os11g0596200 | 2.602860259 | 6.20E-11    | Os11g0156401 | -1.305838949 | 3.26E-80    |
| Os02g0671300 | 1.285118999 | 1.44E-10    | Os02g0300900 | -2.420851657 | 7.22E-05    | Os02g0710500 | 2.602568635 | 0.026870721 | Os12g0503000 | -1.305142795 | 1.19E-112   |
| Os04g0493100 | 1.282759531 | 1.50E-40    | Os06g0337200 | -2.417395605 | 0.001420758 | Os01g0533800 | 2.602272943 | 4.11E-16    | Os04g0402100 | -1.304871907 | 1.29E-211   |
| Os11g0526200 | 1.281526052 | 3.16E-74    | Os04g0559550 | -2.415119778 | 1.22E-05    | Os01g0702000 | 2.602204941 | 2.31E-177   | Os03g0212800 | -1.304035695 | 5.43E-06    |
| Os04g0610000 | 1.280054196 | 5.35E-140   | Os11g0557500 | -2.413860989 | 0.015239646 | Os01g0847000 | 2.599059166 | 0.003176025 | Os04g0168100 | -1.302231938 | 6.15E-06    |
| Os07g0474700 | 1.27972693  | 3.55E-56    | Os10g0389500 | -2.407778042 | 1.13E-273   | Os08g0420700 | 2.598137843 | 3.13E-106   | Os06g0156600 | -1.301102861 | 1.20E-07    |
| Os07g0294300 | 1.279633174 | 6.91E-43    | Os09g0550400 | -2.405255684 | 1.27E-33    | Os08g0281600 | 2.596012064 | 5.22E-07    | Os01g0855600 | -1.300341296 | 1.39E-05    |
| Os03g0432666 | 1.27648565  | 0.005558994 | Os09g0550500 | -2.40477883  | 1.06E-10    | Os09g0505000 | 2.595527107 | 0.000202676 | Os06g0348800 | -1.299676554 | 2.15E-69    |
| Os06g0239500 | 1.275135112 | 2.41E-10    | Os01g0598000 | -2.404316106 | 0.004811226 | Os01g0639600 | 2.591426474 | 0.006877958 | Os09g0347700 | -1.298887519 | 1.87E-165   |
| Os02g0264700 | 1.274728176 | 1.87E-135   | Os06g0280900 | -2.403497127 | 0.002059071 | Os06g0725500 | 2.589951175 | 0.014019528 | Os12g0476200 | -1.297751577 | 2.24E-07    |
| Os02g0291000 | 1.273245697 | 8.62E-07    | Os09g0393501 | -2.401851416 | 0.021835167 | Os10g0493850 | 2.588898578 | 1.78E-06    | Os09g0333000 | -1.29636944  | 0.019470963 |
| Os03g0684400 | 1.273123008 | 2.82E-109   | Os02g0686100 | -2.394046574 | 5.55E-70    | Os01g0668901 | 2.587592789 | 9.61E-31    | Os05g0247100 | -1.296247685 | 4.59E-15    |
| Os04g0420801 | 1.272939026 | 1.13E-09    | Os12g0163000 | -2.389994646 | 0.021916997 | Os04g0512300 | 2.587255101 | 1.88E-06    | Os05g0227600 | -1.295926313 | 3.29E-216   |
| Os03g0858800 | 1.272283569 | 3.99E-05    | Os01g0135700 | -2.389495592 | 5.72E-104   | Os01g0656200 | 2.585591261 | 1.53E-179   | Os07g0123601 | -1.295022218 | 1.01E-86    |
| Os06g0698300 | 1.271977159 | 3.46E-28    | Os10g0149200 | -2.38311974  | 0.000265038 | Os10g0434200 | 2.585212563 | 0.000211675 | Os07g0562700 | -1.29485376  | 3.84E-107   |
| Os05g0304600 | 1.269999241 | 4.90E-30    | Os08g0240200 | -2.381969518 | 1.05E-05    | Os04g0610400 | 2.584206905 | 2.85E-98    | Os01g0882800 | -1.293535819 | 0.004259368 |
| Os08g0320300 | 1.26903037  | 2.65E-164   | Os07g0510800 | -2.378880068 | 4.38E-08    | Os04g0665900 | 2.58420553  | 0.008029728 | Os06g0180666 | -1.29313281  | 3.44E-52    |
| Os07g0516500 | 1.269026695 | 8.96E-128   | Os01g0343400 | -2.375354425 | 0.000779413 | Os05g0392050 | 2.583405629 | 9.10E-09    | Os07g0576600 | -1.292482763 | 3.05E-16    |
| Os10g0463800 | 1.268061384 | 1.10E-46    | Os03g0837700 | -2.372456246 | 0.040078007 | Os11g0598300 | 2.582781022 | 1.23E-13    | Os01g0850900 | -1.291870082 | 0.002361894 |
| Os05g0553400 | 1.267818232 | 2.30E-05    | Os05g0571800 | -2.372438833 | 2.45E-08    | Os05g0447580 | 2.581512184 | 1.08E-08    | Os07g0659900 | -1.291308266 | 3.10E-10    |
| Os07g0522500 | 1.265474207 | 6.84E-88    | Os06g0182300 | -2.371559034 | 8.12E-16    | Os11g0139700 | 2.581361344 | 0           | Os04g0403600 | -1.29119049  | 0.000465708 |
| Os12g0121150 | 1.264560251 | 3.72E-05    | Os12g0516800 | -2.37111878  | 0.032201616 | Os02g0787966 | 2.575397558 | 0.006066972 | Os06g0143400 | -1.290882336 | 1.27E-124   |
| Os02g0831500 | 1.263975937 | 1.17E-28    | Os01g0176900 | -2.370955657 | 1.80E-09    | Os03g0640000 | 2.574805248 | 2.50E-08    | Os06g0695500 | -1.290406686 | 1.85E-21    |
| Os02g0203000 | 1.263494881 | 3.58E-29    | Os01g0121500 | -2.370729411 | 0.011628911 | Os03g0327100 | 2.573569498 | 1.78E-36    | Os03g0327600 | -1.290198594 | 1.08E-195   |
| Os03g0793000 | 1.263198311 | 6.37E-46    | Os10g0141400 | -2.369552372 | 0.000155557 | Os11g0177750 | 2.572137897 | 4.69E-05    | Os03g0311600 | -1.290125579 | 4.73E-165   |
| Os08g0440300 | 1.26260565  | 8.30E-125   | Os03g0267000 | -2.368465523 | 5.75E-28    | Os01g0824800 | 2.57168612  | 0.003735516 | Os02g0594700 | -1.289378103 | 2.39E-21    |
| Os06g0470350 | 1.262117192 | 3.91E-39    | Os07g0549100 | -2.362610727 | 0.003087219 | Os08g0542700 | 2.560718557 | 2.26E-26    | Os03g0822200 | -1.289063237 | 3.90E-62    |
| Os02g0591000 | 1.259306872 | 2.61E-99    | Os01g0860450 | -2.360990719 | 1.47E-05    | Os01g0182600 | 2.560579693 | 0           | Os01g0751400 | -1.28897581  | 0.001806836 |
| Os03g0294900 | 1.257569876 | 0.000115387 | Os10g0195600 | -2.357469328 | 2.42E-10    | Os02g0661900 | 2.559188318 | 4.76E-54    | Os08g0126300 | -1.288152998 | 1.04E-180   |
| Os07g0404900 | 1.249852431 | 0.029509341 | Os02g0524300 | -2.3554      |             |              |             |             |              |              |             |

|              |             |             |              |              |             |              |             |             |              |              |             |
|--------------|-------------|-------------|--------------|--------------|-------------|--------------|-------------|-------------|--------------|--------------|-------------|
| Os01g0786800 | 1.245838932 | 4.35E-07    | Os02g0451501 | -2.350255183 | 0.00014397  | Os04g0667300 | 2.55082844  | 0.004295616 | Os08g0550200 | -1.28298041  | 0.00092217  |
| Os04g0156200 | 1.245075917 | 2.06E-08    | Os04g0445900 | -2.350081668 | 0.00142555  | Os06g0610550 | 2.549157837 | 6.60E-11    | Os06g0269200 | -1.281010579 | 3.15E-26    |
| Os04g0382300 | 1.244612623 | 4.13E-86    | Os06g0109801 | -2.348975833 | 0.000138069 | Os05g0229475 | 2.548475247 | 1.56E-68    | Os05g0593100 | -1.280256232 | 1.25E-155   |
| Os07g0490600 | 1.241204271 | 4.68E-180   | Os10g0158625 | -2.348703053 | 0.005403118 | Os05g0545400 | 2.547420074 | 1.93E-37    | Os06g0592400 | -1.280039241 | 0.003249741 |
| Os01g0725800 | 1.239743155 | 1.36E-121   | Os08g0367300 | -2.344610357 | 7.53E-09    | Os01g0781700 | 2.54544276  | 1.09E-06    | Os01g0859200 | -1.279599704 | 2.95E-87    |
| Os04g0174900 | 1.238866179 | 7.14E-06    | Os08g0476700 | -2.343542321 | 0.006037068 | Os04g0514900 | 2.543730965 | 0.002586232 | Os09g0459600 | -1.277764382 | 5.26E-08    |
| Os03g0305100 | 1.236290239 | 1.05E-27    | Os01g0558100 | -2.327565136 | 0.017014971 | Os04g0113100 | 2.543521954 | 2.31E-06    | Os06g0214300 | -1.277084114 | 0.000210908 |
| Os04g0617200 | 1.234048309 | 4.33E-28    | Os01g0369200 | -2.322622223 | 5.28E-115   | Os05g0374500 | 2.542976232 | 4.85E-43    | Os06g0199400 | -1.275058669 | 1.11E-20    |
| Os01g0768200 | 1.233551255 | 9.06E-30    | Os06g0662550 | -2.322408151 | 0.004812801 | Os03g0583700 | 2.54052435  | 0.002884514 | Os07g0671400 | -1.27503163  | 2.17E-44    |
| Os12g0458900 | 1.232564556 | 6.12E-27    | Os03g0342100 | -2.309582512 | 3.98E-27    | Os03g0306302 | 2.538592214 | 1.94E-08    | Os04g0447600 | -1.274143289 | 0.000809385 |
| Os11g0673900 | 1.23152308  | 0.016855917 | Os04g0340300 | -2.304323982 | 0.020175699 | Os06g0645901 | 2.53828557  | 8.71E-20    | Os03g0310800 | -1.273764421 | 4.18E-34    |
| Os03g0794900 | 1.231463559 | 1.13E-156   | Os01g0296166 | -2.304102943 | 3.80E-14    | Os05g0461600 | 2.536921884 | 0           | Os04g0685000 | -1.273544772 | 7.80E-27    |
| Os03g0285300 | 1.230617357 | 1.83E-05    | Os01g0153800 | -2.30036662  | 0.000596693 | Os03g0638000 | 2.534247367 | 3.13E-30    | Os04g0656800 | -1.27312574  | 2.48E-174   |
| Os04g0369066 | 1.229268365 | 2.72E-35    | Os05g0573300 | -2.300150387 | 0           | Os01g0505600 | 2.533385389 | 0.035327368 | Os02g0668000 | -1.272327494 | 1.46E-44    |
| Os01g0622500 | 1.229056105 | 3.23E-65    | Os08g0203201 | -2.2990901   | 0.008515807 | Os08g0336200 | 2.527782732 | 0.017009256 | Os05g0436950 | -1.272082139 | 0.001571829 |
| Os08g0189600 | 1.227627743 | 1.36E-05    | Os11g0599000 | -2.299057684 | 5.91E-08    | Os01g0170051 | 2.525784997 | 0.0003039   | Os01g0964133 | -1.270046495 | 1.81E-156   |
| Os02g0223300 | 1.226035114 | 0.045911991 | Os11g0473832 | -2.294122224 | 1.18E-07    | Os07g0646400 | 2.524204978 | 1.05E-19    | Os08g0102000 | -1.26958548  | 0.017510291 |
| Os03g0789600 | 1.226006069 | 1.22E-41    | Os11g0201540 | -2.289009365 | 0.001298458 | Os03g0849800 | 2.521840236 | 5.67E-30    | Os05g0554601 | -1.268011051 | 2.43E-52    |
| Os08g0143900 | 1.225871727 | 6.14E-111   | Os07g0575000 | -2.28774259  | 7.75E-10    | Os02g0118875 | 2.521785196 | 2.03E-10    | Os10g0442400 | -1.267943765 | 0.001816548 |
| Os01g0868000 | 1.224851345 | 4.29E-07    | Os10g0131500 | -2.281133097 | 0.003878975 | Os07g0635800 | 2.521482933 | 1.83E-19    | Os03g0263700 | -1.26708421  | 5.28E-21    |
| Os05g0441500 | 1.22437639  | 1.37E-124   | Os02g0525501 | -2.278897649 | 2.31E-08    | Os06g0296100 | 2.520454219 | 1.62E-13    | Os08g0366000 | -1.266792753 | 5.03E-10    |
| Os12g0124100 | 1.22388445  | 6.26E-47    | Os10g0413900 | -2.278581802 | 2.01E-08    | Os11g0569600 | 2.516278181 | 2.90E-10    | Os01g0685800 | -1.266702064 | 0.044976895 |
| Os01g0686100 | 1.223564456 | 2.10E-87    | Os01g0205300 | -2.276770191 | 0.01760468  | Os12g0614800 | 2.513910826 | 1.53E-18    | Os06g0247000 | -1.266327244 | 8.77E-31    |
| Os06g0509100 | 1.22010885  | 4.93E-93    | Os04g0367000 | -2.269943481 | 0.000223665 | Os08g0474100 | 2.513428428 | 5.42E-18    | Os01g0838350 | -1.266253354 | 6.08E-23    |
| Os03g0151100 | 1.219855783 | 4.76E-83    | Os04g0603200 | -2.269038297 | 0.016022105 | Os06g0717700 | 2.51218067  | 3.61E-10    | Os03g0856300 | -1.265322068 | 2.63E-37    |
| Os12g0617250 | 1.21980227  | 1.08E-05    | Os04g0621900 | -2.268460549 | 5.25E-09    | Os07g0578050 | 2.507874731 | 0.001159272 | Os12g0264800 | -1.265136456 | 2.48E-18    |
| Os01g0661500 | 1.21965825  | 6.79E-153   | Os07g0624600 | -2.266337619 | 1.73E-14    | Os02g0658800 | 2.506312253 | 2.54E-37    | Os01g0514700 | -1.264496403 | 0.034121055 |
| Os12g0539751 | 1.216042373 | 6.80E-73    | Os03g0261800 | -2.264684895 | 0           | Os05g0580800 | 2.501446344 | 8.05E-05    | Os03g0178500 | -1.264431898 | 7.56E-07    |
| Os05g0366600 | 1.213316319 | 0.001378134 | Os11g0469900 | -2.263302662 | 0.000231784 | Os05g0381600 | 2.50118605  | 8.55E-12    | Os08g0438400 | -1.263738978 | 9.70E-91    |
| Os02g0628100 | 1.2128479   | 2.15E-20    | Os05g0482400 | -2.262708049 | 1.79E-47    | Os02g0646200 | 2.500986853 | 2.64E-09    | Os08g0369000 | -1.263207473 | 8.94E-44    |
| Os06g0222100 | 1.211385801 | 4.20E-43    | Os12g0501700 | -2.26246528  | 0.035227485 | Os01g0317500 | 2.499754292 | 2.95E-05    | Os01g0600900 | -1.262104909 | 4.09E-185   |
| Os05g0374200 | 1.209770173 | 1.15E-05    | Os05g0186300 | -2.257932631 | 0.000608872 | Os03g0762800 | 2.495791897 | 0.035327368 | Os03g0114900 | -1.261342752 | 6.73E-56    |
| Os09g0376800 | 1.209369973 | 1.56E-47    | Os04g0498101 | -2.25558612  | 1.07E-08    | Os10g0400250 | 2.495287842 | 1.27E-11    | Os05g0111200 | -1.261180362 | 8.43E-114   |
| Os06g0608800 | 1.209215756 | 9.88E-115   | Os02g0152900 | -2.254472505 | 3.82E-12    | Os06g0299200 | 2.49323879  | 0.00254182  | Os01g0238800 | -1.260580929 | 8.63E-50    |
| Os06g0204600 | 1.209017567 | 0.00482752  | Os09g0455300 | -2.254314533 | 1.48E-16    | Os05g0386800 | 2.492741102 | 0.030125502 | Os03g0240700 | -1.260336029 | 3.07E-146   |
| Os11g0236100 | 1.208933508 | 0.000256697 | Os05g0177900 | -2.252318573 | 0.030028466 | Os01g0765200 | 2.49118566  | 4.79E-28    | Os06g0618000 | -1.260026714 | 0.029907291 |
| Os09g0485600 | 1.208924288 | 4.30E-11    | Os01g0341300 | -2.252019738 | 2.73E-05    | Os05g0589200 | 2.491036904 | 4.43E-47    | Os03g0170500 | -1.25828349  | 9.86E-11    |
| Os01g0734600 | 1.208076789 | 4.33E-12    | Os02g0129000 | -2.25149827  | 3.94E-08    | Os08g0235183 | 2.490335644 | 0.001317904 | Os11g0639400 | -1.257079948 | 0.000811354 |
| Os02g0108700 | 1.206554838 | 1.93E-19    | Os11g0279750 | -2.249621975 | 0.046000222 | Os11g0517800 | 2.4900747   | 8.36E-58    | Os09g0465500 | -1.254887833 | 9.91E-40    |
| Os12g0233300 | 1.206467985 | 3.79E-21    | Os05g0573800 | -2.248435149 | 6.66E-16    | Os03g0258000 | 2.488435304 | 0.029148371 | Os05g0584400 | -1.25371972  | 8.99E-37    |
| Os10g0460766 | 1.205920286 | 6.50E-16    | Os11g0220100 | -2.246432181 | 0.008925245 | Os04g0523200 | 2.487357753 | 1.74E-14    | Os09g0437100 | -1.253480347 | 2.22E-21    |
| Os04g0559400 | 1.20435411  | 4.98E-89    | Os01g0518400 | -2.242469029 | 0.000616057 | Os04g0687800 | 2.483914954 | 0.00046911  | Os02g0637900 | -1.253320842 | 4.37E-90    |
| Os01g0248701 | 1.203425602 | 0.000493331 | Os02g0164400 | -2.241661743 | 3.33E-15    | Os10g0492101 | 2.480544489 | 2.96E-12    | Os02g0141500 | -1.253305776 | 8.50E-74    |
| Os02g0142875 | 1.202636067 | 7.90E-16    | Os03g0218400 | -2.241297769 | 0.002901774 | Os03g0243200 | 2.48038804  | 4.94E-16    | Os08g0562800 | -1.252959798 | 1.41E-05    |
| Os12g0617100 | 1.202476759 | 2.66E-45    | Os04g0354200 | -2.240788929 | 0.013632891 | Os08g0112000 | 2.479413054 | 1.15E-19    | Os06g0543200 | -1.250961445 | 2.70E-08    |
| Os03g0779300 | 1.202265236 | 0.000341959 | Os01g0967700 | -2.239188772 | 0.001225452 | Os11g0440200 | 2.477409304 | 0.000150714 | Os03g0711600 | -1.250015254 | 2.13E-125   |
| Os05g0182600 | 1.201926906 | 1.64E-74    | Os02g0669100 | -2.237597857 | 0           | Os10g0558700 | 2.476167096 | 2.76E-12    | Os09g0326900 | -1.249965857 | 3.87E-165   |
| Os01g0881800 | 1.20167982  | 1.78E-30    | Os05g0450733 | -2.234967548 | 0.00036382  | Os04g0379933 | 2.472147315 | 7.51E-10    | Os07g0413800 | -1.249900149 | 0.049289708 |
| Os02g0744900 | 1.201184038 | 2.70E-69    | Os05g0376000 | -2.234618047 | 0.01423769  | Os08g0480200 | 2.471532178 | 3.78E-59    | Os01g0192600 | -1.248665699 | 1.73E-80    |
| Os04g0667300 | 1.20010813  | 0.009026099 | Os04g0454900 | -2.233777002 | 8.74E-10    | Os04g0681450 | 2.469768688 | 0.046503528 | Os03g0165900 | -1.247433007 | 0.001612037 |
| Os06g0634000 | 1.198436471 | 1.26E-05    | Os01g0906425 | -2.233567961 | 6.11E-08    | Os02g0598300 | 2.468373738 | 6.04E-21    | Os02g0501350 | -1.243816559 | 9.74E-30    |
| Os08g0402800 | 1.197647253 | 5.87E-08    | Os08g0522100 | -2.233218752 | 1.74E-06    | Os08g0553750 | 2.466678695 | 0.001007048 | Os05g0232200 | -1.24368814  | 1.14E-16    |
| Os01g0682500 | 1.19723974  | 1.07E-35    | Os02g0181300 | -2.231639836 | 7.53E-70    | Os06g0125000 | 2.466556394 | 0.0152181   | Os05g0102000 | -1.243548591 | 2.34E-05    |
| Os07g0673400 | 1.196848972 | 1.35E-17    | Os04g0577700 | -2.231336443 | 3.03E-08    | Os01g0132000 | 2.465936888 | 4.80E-19    | Os10g0519300 | -1.243274256 | 0.004656102 |
| Os05g0363951 | 1.19671219  | 0.003081996 | Os03g0351300 | -2.227876098 | 1.13E-90    | Os01g0837350 | 2.464862524 | 0.004720804 | Os11g0429433 | -1.242624933 | 1.07E-43    |
| Os04g0593800 | 1.196020395 | 3.78E-68    | Os02g0171700 | -2.223392456 | 0.014445954 | Os07g0521500 | 2.462954934 | 7.81E-06    | Os02g0102000 | -1.241601928 | 9.54E-59    |
| Os04g0201800 | 1.195709549 | 1.87E-05    | Os06g0201200 | -2.215917562 | 4.64E-12    | Os01g0810866 | 2.461982151 | 0.001187889 | Os07g0186000 | -1.240678666 | 1.08E-152   |
| Os01g0952600 | 1.194960325 | 6.36E-153   | Os09g0415050 | -2.209365582 | 5.62E-14    | Os03g0718300 | 2.461235477 | 5.03E-05    | Os04g0101400 | -1.240130016 | 0.003211798 |
| Os08g0386800 | 1.194660477 | 3.31E-140   | Os11g0549537 | -2.205931063 | 0.01760468  | Os07g0136800 | 2.458729262 | 3.45E-51    | Os05g0191700 | -1.240116262 | 2.46E-10    |
| Os02g0740500 | 1.193483691 | 2.01E-05    | Os06g0542701 | -2.203610701 | 0.019458521 | Os09g0501100 | 2.458639062 | 0.046503528 | Os02g0581100 | -1.239867775 | 1.36E-38    |
| Os06g0581300 | 1.19168166  | 2.43E-50    | Os10g0565700 | -2.203361718 | 0.028302374 | Os02g0255033 | 2.455261552 | 0.001096666 | Os09g0512000 | -1.239789034 | 0.025292522 |
| Os08g0327100 | 1.190658804 | 4.61E-130   | Os03g0663900 | -2.202766966 | 8.28E-132   | Os10g0414000 | 2.453902475 | 0.03352168  | Os06g0624700 | -1.237947974 | 3.35E-21    |
| Os05g0190300 | 1.190579682 | 1.01E-13    | Os09g0371000 | -2.201591181 | 0.001859342 | Os04g0492500 | 2.453223573 | 2.41E-18    | Os03g0622300 | -1.23740343  | 1.01E-64    |
| Os09g0491756 | 1.190196387 | 2.73E-110   | Os04g0370100 | -2.200649814 | 2.37E-08    | Os07g0690800 | 2.451676137 | 2.22E-22    | Os04g0450800 | -1.237346731 | 3.89E-190   |
| Os02g0704966 | 1.189949177 | 4.24E-99    | Os01g0225550 | -2.200429078 | 0.038489861 | Os03g0439900 | 2.450126978 | 3.17E-06    | Os08g0435900 | -1.237044389 | 3.06E-154   |
| Os09g0563200 | 1.189894277 | 2.00E-22    | Os04g0500900 | -2.196704712 | 6.49E-42    | Os10g0515200 | 2.449676291 | 0.02948069  |              |              |             |

|              |             |             |              |              |             |              |             |             |              |              |             |
|--------------|-------------|-------------|--------------|--------------|-------------|--------------|-------------|-------------|--------------|--------------|-------------|
| Os05g0481900 | 1.187154209 | 2.29E-21    | Os02g0129800 | -2.183784881 | 1.78E-15    | Os12g0123700 | 2.443382246 | 5.21E-16    | Os04g0662200 | -1.231798899 | 1.81E-101   |
| Os01g0192000 | 1.186491498 | 1.90E-171   | Os10g0390900 | -2.183610881 | 0.034697752 | Os12g0235600 | 2.44196203  | 3.58E-44    | Os06g0233800 | -1.230770978 | 1.47E-84    |
| Os08g0254600 | 1.186057979 | 6.81E-08    | Os07g0273000 | -2.182392629 | 0.000218193 | Os11g0271000 | 2.440210625 | 1.49E-14    | Os05g0154800 | -1.227632582 | 1.41E-32    |
| Os04g0101400 | 1.18587255  | 0.001985709 | Os08g0368333 | -2.182078243 | 6.48E-13    | Os06g0136600 | 2.438372605 | 2.31E-26    | Os05g0468700 | -1.227341856 | 0.049842225 |
| Os07g0236200 | 1.18364919  | 1.32E-117   | Os08g0273000 | -2.181914923 | 0.012305944 | Os08g0234700 | 2.43762519  | 5.76E-33    | Os05g0368600 | -1.225795194 | 1.68E-06    |
| Os01g0844900 | 1.181917431 | 4.94E-16    | Os05g0517400 | -2.181662856 | 3.25E-182   | Os04g0231800 | 2.437505748 | 0.005871634 | Os05g0588700 | -1.224814134 | 3.13E-37    |
| Os07g0691600 | 1.179963693 | 0.005084163 | Os11g0157000 | -2.180662888 | 4.11E-06    | Os07g0631900 | 2.436866725 | 7.51E-140   | Os01g0923000 | -1.224508754 | 3.13E-19    |
| Os03g0164200 | 1.17910215  | 0.002946017 | Os06g0685300 | -2.173658463 | 0.032643108 | Os09g0400600 | 2.435427274 | 0.001162245 | Os01g0802900 | -1.224476343 | 0.00013473  |
| Os09g0478300 | 1.177748473 | 5.44E-09    | Os02g0795732 | -2.171331937 | 0.001603024 | Os08g0226400 | 2.434665335 | 1.31E-11    | Os07g0691800 | -1.223957977 | 9.59E-41    |
| Os06g0313000 | 1.176293846 | 2.05E-05    | Os10g0525500 | -2.170891018 | 0.029864958 | Os10g0401000 | 2.429623227 | 2.20E-69    | Os02g0699500 | -1.223518839 | 1.88E-127   |
| Os06g0647900 | 1.176069885 | 7.73E-21    | Os02g0169700 | -2.164723011 | 0.00051151  | Os05g0374200 | 2.428908388 | 1.44E-07    | Os03g0416300 | -1.223484197 | 6.94E-42    |
| Os04g0462500 | 1.175726176 | 1.77E-85    | Os05g0488500 | -2.159241616 | 5.46E-26    | Os03g0296000 | 2.428339791 | 0.000420666 | Os08g0159500 | -1.2226508   | 4.96E-121   |
| Os03g0342900 | 1.174733991 | 5.20E-128   | Os03g0690700 | -2.15855453  | 0.000404546 | Os02g0682300 | 2.427343243 | 0.046503528 | Os11g0602600 | -1.222644299 | 6.27E-157   |
| Os04g0170500 | 1.172821572 | 1.26E-14    | Os09g0454900 | -2.158038065 | 0.006933335 | Os10g0499700 | 2.427064802 | 0.019319282 | Os06g0604300 | -1.222413835 | 0.002121994 |
| Os02g0316900 | 1.172008491 | 4.35E-81    | Os04g0678400 | -2.154172648 | 1.74E-89    | Os01g0872566 | 2.426029713 | 0.000240392 | Os05g0106600 | -1.222164368 | 1.04E-110   |
| Os02g0213450 | 1.171837284 | 4.37E-38    | Os05g0492600 | -2.152917708 | 0.027412134 | Os07g0661550 | 2.425329435 | 5.16E-15    | Os06g0581300 | -1.22125668  | 5.00E-65    |
| Os07g0155600 | 1.171041278 | 6.96E-05    | Os03g0718500 | -2.151509102 | 3.83E-11    | Os03g0102300 | 2.421857476 | 2.39E-08    | Os07g0107366 | -1.221236759 | 1.28E-05    |
| Os09g0296800 | 1.170229927 | 2.46E-32    | Os01g0305200 | -2.15119266  | 9.04E-06    | Os05g0210525 | 2.421662652 | 0.000674421 | Os03g0800100 | -1.22092143  | 3.29E-25    |
| Os03g0775000 | 1.170120788 | 4.19E-06    | Os04g0299500 | -2.150080595 | 8.09E-05    | Os10g0159033 | 2.419311754 | 0.046503528 | Os02g0189100 | -1.219922381 | 3.62E-61    |
| Os06g0149100 | 1.169770207 | 6.86E-42    | Os06g0702100 | -2.147118437 | 0.042452448 | Os02g0536300 | 2.416170956 | 9.54E-13    | Os01g0736100 | -1.21917965  | 0.00075334  |
| Os02g0528500 | 1.169418055 | 1.22E-134   | Os10g0504100 | -2.146142259 | 1.95E-05    | Os11g0248466 | 2.412515028 | 4.22E-13    | Os02g0167300 | -1.218558811 | 3.35E-139   |
| Os12g0632600 | 1.169053148 | 0.002306852 | Os03g0393375 | -2.145834341 | 3.81E-08    | Os07g0195350 | 2.411059932 | 2.84E-09    | Os01g0222600 | -1.218434079 | 5.43E-12    |
| Os09g0428300 | 1.168638914 | 4.71E-12    | Os11g0104260 | -2.139876085 | 0.017699801 | Os09g0555500 | 2.409156466 | 4.26E-170   | Os10g0362700 | -1.218089288 | 4.80E-33    |
| Os06g0546500 | 1.168564003 | 1.18E-12    | Os08g0203150 | -2.139379514 | 0.002010184 | Os02g0136966 | 2.40834177  | 2.82E-11    | Os03g0640800 | -1.217272797 | 3.35E-19    |
| Os04g0204400 | 1.168406896 | 3.61E-09    | Os02g0445600 | -2.138450941 | 1.07E-07    | Os09g0515550 | 2.405511483 | 0.000537584 | Os03g0129800 | -1.215286066 | 0.000596402 |
| Os12g0407200 | 1.168053576 | 8.84E-06    | Os12g0133400 | -2.135678897 | 1.22E-08    | Os04g0448950 | 2.404947767 | 4.31E-22    | Os10g0147200 | -1.215259344 | 3.45E-68    |
| Os04g0128900 | 1.168006692 | 1.00E-10    | Os10g0140700 | -2.135058807 | 2.39E-36    | Os02g0492800 | 2.404087966 | 4.46E-11    | Os02g0833600 | -1.214396371 | 3.24E-60    |
| Os12g0611100 | 1.167007421 | 0.039962115 | Os10g0496000 | -2.130995867 | 6.98E-39    | Os04g0430950 | 2.402191739 | 1.17E-52    | Os06g0118600 | -1.212681235 | 3.54E-61    |
| Os05g0203912 | 1.166186711 | 0.002118518 | Os08g0566700 | -2.130861878 | 1.57E-20    | Os01g0299150 | 2.402097238 | 9.21E-06    | Os06g0608300 | -1.212582405 | 2.15E-122   |
| Os03g0753600 | 1.166093567 | 3.75E-48    | Os02g0819000 | -2.129189152 | 1.21E-28    | Os01g0916350 | 2.400966804 | 1.01E-10    | Os01g0605000 | -1.211806073 | 0.00771936  |
| Os03g0671800 | 1.166011745 | 8.71E-10    | Os04g0495300 | -2.125645964 | 3.31E-09    | Os10g0511800 | 2.400632987 | 2.58E-24    | Os07g0405100 | -1.211003944 | 2.21E-14    |
| Os12g0169950 | 1.165821466 | 2.31E-06    | Os12g0514000 | -2.124660082 | 0.004058014 | Os07g0581700 | 2.399883941 | 3.83E-47    | Os08g0509200 | -1.210713751 | 0.002660548 |
| Os07g0297400 | 1.164861648 | 5.03E-135   | Os09g0489500 | -2.11766777  | 7.02E-71    | Os01g0295700 | 2.39810322  | 1.33E-146   | Os06g0548000 | -1.210045614 | 1.96E-25    |
| Os02g0255033 | 1.164733492 | 0.005359666 | Os03g0635000 | -2.115744463 | 0.001651124 | Os01g0556400 | 2.396585334 | 1.49E-42    | Os03g0188400 | -1.209370453 | 6.41E-45    |
| Os01g0508500 | 1.164598236 | 0.045366888 | Os01g0133600 | -2.115741136 | 0.000179274 | Os06g0152500 | 2.394248795 | 1.51E-23    | Os01g0360200 | -1.2091136   | 1.61E-13    |
| Os02g0744700 | 1.164097554 | 7.61E-29    | Os04g0275100 | -2.115152399 | 3.91E-12    | Os04g0528200 | 2.393337731 | 3.03E-06    | Os03g0196250 | -1.20890399  | 5.47E-41    |
| Os01g0733100 | 1.163498304 | 1.13E-08    | Os07g0283125 | -2.112235299 | 0.034953395 | Os01g0147250 | 2.392865184 | 4.22E-22    | Os10g0430200 | -1.208670331 | 8.59E-35    |
| Os02g0497600 | 1.162109612 | 1.58E-07    | Os11g0631400 | -2.111161544 | 1.16E-13    | Os03g0784600 | 2.391327862 | 6.71E-13    | Os02g0817000 | -1.208262449 | 1.07E-20    |
| Os04g0269900 | 1.161620214 | 9.15E-51    | Os12g0293000 | -2.108303104 | 4.76E-22    | Os02g0219050 | 2.390517882 | 0.001087796 | Os01g0211600 | -1.20813979  | 2.53E-46    |
| Os04g0490800 | 1.160555191 | 2.96E-24    | Os10g0118000 | -2.106721851 | 0.000533544 | Os03g0165800 | 2.389140773 | 0.002280066 | Os01g0612200 | -1.206220541 | 1.15E-140   |
| Os08g0255500 | 1.160238179 | 0.005230233 | Os05g0179100 | -2.10592873  | 0.043327181 | Os04g0461750 | 2.387651718 | 3.94E-06    | Os09g0332100 | -1.204914423 | 0.041995066 |
| Os04g0436400 | 1.160065079 | 6.45E-86    | Os02g0728001 | -2.105434327 | 8.84E-10    | Os06g0531000 | 2.384837605 | 1.09E-09    | Os02g0678200 | -1.204513326 | 0.003389832 |
| Os07g0542400 | 1.156396624 | 0.004209137 | Os02g0299300 | -2.104007843 | 1.80E-09    | Os01g0388101 | 2.383875905 | 2.49E-09    | Os04g0681400 | -1.204415081 | 2.50E-56    |
| Os02g0700400 | 1.156378267 | 0.011609252 | Os03g0623100 | -2.102246006 | 0.024314598 | Os03g0210450 | 2.382990917 | 5.95E-07    | Os07g0186400 | -1.204318879 | 4.65E-135   |
| Os03g0128800 | 1.155523271 | 0.000973764 | BAC19903     | -2.101346781 | 0.000690705 | Os01g0709750 | 2.380487471 | 3.19E-06    | Os05g0118700 | -1.202567349 | 1.59E-19    |
| Os05g0121600 | 1.1543332   | 2.57E-40    | Os02g0581800 | -2.101309048 | 0.001676809 | Os05g0498800 | 2.379769411 | 6.99E-33    | Os03g0154700 | -1.202498782 | 4.82E-164   |
| Os06g0204800 | 1.153978308 | 7.38E-67    | Os03g0642600 | -2.100379565 | 0.040014969 | Os06g0133400 | 2.379306003 | 7.26E-15    | Os02g0791500 | -1.202315704 | 1.52E-28    |
| Os09g0403300 | 1.153854017 | 0.008032204 | Os01g0786500 | -2.09446193  | 3.09E-32    | Os06g0171500 | 2.377932657 | 0.046503528 | Os09g0501200 | -1.201751438 | 2.24E-22    |
| Os12g0581700 | 1.153766491 | 6.12E-132   | Os03g0204500 | -2.093870734 | 1.55E-10    | Os06g0234300 | 2.376933008 | 0.000427796 | Os03g0227400 | -1.200851498 | 8.93E-08    |
| Os07g0117900 | 1.153406129 | 0.018708976 | Os12g0630600 | -2.092499067 | 1.14E-05    | Os02g0155600 | 2.376340471 | 0.023496977 | Os09g0527900 | -1.19954801  | 7.37E-149   |
| Os03g0831550 | 1.153092335 | 0.006730206 | Os09g0536800 | -2.09075536  | 0.031387184 | Os01g0955000 | 2.375074394 | 1.49E-43    | Os11g0197600 | -1.198989572 | 4.03E-103   |
| Os03g0684700 | 1.153044755 | 8.28E-06    | Os11g0226700 | -2.087706161 | 9.46E-05    | Os02g0686800 | 2.375072568 | 0.002925074 | Os12g0510200 | -1.198876287 | 7.53E-28    |
| Os12g0186600 | 1.15293149  | 2.02E-20    | Os06g0616900 | -2.087354264 | 0.009612773 | Os09g0536800 | 2.374313991 | 0.02940141  | Os02g0696500 | -1.198767342 | 9.48E-114   |
| Os08g0114100 | 1.152301932 | 1.50E-05    | Os05g0518300 | -2.087331937 | 4.19E-16    | Os03g0112600 | 2.374139348 | 2.87E-19    | Os01g0565900 | -1.198040704 | 2.27E-64    |
| Os06g0275800 | 1.150646769 | 8.69E-21    | Os02g0103800 | -2.087159286 | 0.001627374 | Os08g0510300 | 2.374127255 | 1.07E-25    | Os11g0156800 | -1.197813687 | 0.004678289 |
| Os08g0417000 | 1.149984244 | 0.00034329  | Os02g0612200 | -2.086933819 | 2.16E-15    | Os03g0610900 | 2.374063262 | 8.71E-116   | Os03g0607200 | -1.197662239 | 2.23E-148   |
| Os06g0242900 | 1.149672056 | 3.12E-05    | Os08g0278900 | -2.086893929 | 6.69E-107   | Os02g0509600 | 2.37389259  | 0.046503528 | Os04g0206700 | -1.197639859 | 3.77E-25    |
| Os10g0364900 | 1.149461806 | 2.53E-07    | Os08g0385650 | -2.084811563 | 0.01760468  | Os02g0105300 | 2.373332663 | 0.000172672 | Os04g0460350 | -1.197003761 | 3.89E-09    |
| Os01g0652600 | 1.14944347  | 5.31E-171   | Os01g0332100 | -2.084489945 | 1.92E-214   | Os06g0558766 | 2.371693302 | 1.06E-113   | Os08g0113400 | -1.196915737 | 0.012375833 |
| Os01g0757200 | 1.148926767 | 2.21E-21    | Os08g0194000 | -2.080336208 | 0.034373972 | Os05g0343400 | 2.370640406 | 7.97E-92    | Os12g0429950 | -1.195247877 | 1.96E-37    |
| Os06g0527100 | 1.148673817 | 2.13E-21    | Os12g0178633 | -2.080042962 | 2.85E-07    | Os11g0261600 | 2.370625755 | 4.36E-11    | Os01g0937900 | -1.19467705  | 5.65E-37    |
| Os03g0650200 | 1.14762855  | 0.000257879 | Os04g0677100 | -2.078670584 | 7.13E-07    | Os03g0353600 | 2.370309848 | 5.97E-35    | Os02g0189200 | -1.193535133 | 0.005417989 |
| Os02g0537200 | 1.146438161 | 2.68E-139   | Os01g0387865 | -2.078254931 | 0.001786131 | Os07g0493800 | 2.368232807 | 0.046503528 | Os06g0711900 | -1.193427189 | 4.31E-51    |
| Os03g0559900 | 1.143720405 | 1.90E-77    | Os04g0361500 | -2.078217179 | 0.021507704 | Os09g0478000 | 2.3676186   | 6.75E-14    | Os12g0173366 | -1.193312306 | 4.42E-29    |
| Os04g0163700 | 1.143591172 | 2.26E-15    | Os01g0733500 | -2.076431528 | 1.20E-161   | Os02g0230875 | 2.363512184 | 0.024505362 | Os10g0390000 | -1.193300507 | 3.44E-10    |
| Os03g0566700 | 1.143507213 | 0.006403645 | Os12g0192300 | -2.076137824 | 0.000590495 |              |             |             |              |              |             |

|              |             |             |              |              |             |              |             |             |              |              |             |
|--------------|-------------|-------------|--------------|--------------|-------------|--------------|-------------|-------------|--------------|--------------|-------------|
| Os06g0258900 | 1.13512832  | 1.94E-166   | Os01g0949700 | -2.071598899 | 0.017644453 | Os04g0566900 | 2.356381171 | 1.26E-65    | Os02g0555832 | -1.187168353 | 1.46E-14    |
| Os05g0586050 | 1.135083801 | 2.75E-07    | Os07g0575600 | -2.069154618 | 2.14E-08    | Os01g0374200 | 2.355700517 | 2.93E-16    | Os11g0614400 | -1.185446844 | 6.24E-19    |
| Os03g0116400 | 1.134981908 | 1.50E-10    | Os01g0606900 | -2.069127498 | 6.64E-107   | Os07g0421932 | 2.354789042 | 4.13E-05    | Os12g0592200 | -1.185027225 | 5.51E-81    |
| Os06g0554700 | 1.134848517 | 0.000363956 | Os06g0147000 | -2.068813849 | 3.43E-15    | Os10g0482066 | 2.353587529 | 9.04E-05    | Os09g0510200 | -1.185023306 | 4.17E-77    |
| Os11g0639400 | 1.134643579 | 0.002352746 | Os12g0126100 | -2.066667447 | 0.0394008   | Os04g0679400 | 2.351577293 | 6.56E-305   | Os12g0291100 | -1.182828916 | 1.67E-38    |
| Os12g0285700 | 1.134612824 | 0.031983441 | Os07g0129100 | -2.062418935 | 1.12E-11    | Os03g0183300 | 2.350590215 | 0           | Os10g0509600 | -1.180602295 | 0.04136893  |
| Os08g0178800 | 1.133999959 | 5.30E-61    | Os02g0323000 | -2.062032198 | 4.23E-27    | Os08g0108001 | 2.350253464 | 2.19E-06    | Os07g0576550 | -1.180440464 | 2.06E-05    |
| Os01g0540800 | 1.133767079 | 1.06E-32    | Os02g0620400 | -2.061466689 | 7.96E-183   | Os06g0207200 | 2.349411337 | 0.00572749  | Os03g0170600 | -1.180318564 | 3.65E-110   |
| Os03g0191000 | 1.133285627 | 1.49E-76    | Os06g0621600 | -2.061288087 | 0.00011046  | Os02g0247000 | 2.345654618 | 1.31E-13    | Os11g0111101 | -1.180025854 | 4.55E-44    |
| Os11g0216300 | 1.132468231 | 1.81E-69    | Os01g0587500 | -2.059509855 | 2.43E-09    | Os01g0860450 | 2.339779153 | 0.000147323 | Os05g0399300 | -1.179365548 | 0.005686419 |
| Os11g0602400 | 1.132433692 | 9.36E-19    | Os02g0744200 | -2.053842979 | 3.25E-41    | Os08g0551900 | 2.339088096 | 1.59E-09    | Os04g0669475 | -1.178796558 | 1.27E-35    |
| Os02g0191800 | 1.132139569 | 2.15E-07    | Os03g0721900 | -2.052628343 | 8.37E-55    | Os07g0187350 | 2.337838662 | 1.23E-54    | Os03g0194300 | -1.178099513 | 5.84E-06    |
| Os12g0552500 | 1.131615219 | 7.54E-09    | Os12g0603800 | -2.051081158 | 1.06E-05    | Os11g0226550 | 2.336911382 | 3.37E-23    | Os05g0576900 | -1.177774377 | 5.58E-10    |
| Os03g0701200 | 1.130677128 | 0.000214296 | Os07g0656600 | -2.049355621 | 0.022441828 | Os08g0174750 | 2.336580313 | 0.005217171 | Os02g0622300 | -1.177449283 | 8.45E-21    |
| Os03g0117100 | 1.130448662 | 2.09E-22    | Os06g0112300 | -2.04704678  | 1.05E-18    | Os02g0773500 | 2.33641116  | 2.99E-08    | Os05g0220600 | -1.176494819 | 1.00E-32    |
| Os07g0461900 | 1.130283421 | 3.20E-40    | Os05g0386400 | -2.04656193  | 0.000614705 | Os09g0441600 | 2.336211634 | 0.008437519 | Os07g0605400 | -1.176027131 | 1.81E-65    |
| Os03g0169700 | 1.129972936 | 0.00231365  | Os07g0541200 | -2.046135465 | 2.15E-05    | Os06g0556451 | 2.335890211 | 0.002657162 | Os01g0293000 | -1.175990851 | 3.26E-10    |
| Os10g0548200 | 1.129234019 | 2.81E-167   | Os04g0669300 | -2.045282161 | 0.000834027 | Os10g0535800 | 2.33583526  | 0.013771003 | Os04g0307800 | -1.175762266 | 0.008514947 |
| Os07g0213500 | 1.128828813 | 1.23E-42    | Os07g0612400 | -2.041866386 | 0.012838437 | Os08g0195800 | 2.333597859 | 0.049532863 | Os11g0549615 | -1.175069861 | 2.10E-09    |
| Os05g0439100 | 1.128645045 | 1.24E-25    | Os05g0236600 | -2.041487251 | 0.020655993 | Os01g0309800 | 2.332603926 | 1.31E-12    | Os09g0516451 | -1.173713763 | 6.72E-24    |
| Os08g0199525 | 1.128470537 | 0.001591405 | Os03g0184100 | -2.039095911 | 0           | Os07g0624600 | 2.33237872  | 2.91E-28    | Os06g0134700 | -1.17152272  | 4.55E-45    |
| Os11g0202300 | 1.128403437 | 2.25E-46    | Os02g0745100 | -2.038610499 | 0.033159348 | Os09g0103150 | 2.32988216  | 2.62E-12    | Os12g0573000 | -1.170257151 | 1.98E-38    |
| Os09g0563901 | 1.128302797 | 0.001786131 | Os11g0547800 | -2.037232803 | 2.42E-13    | Os04g0244800 | 2.329416213 | 0           | Os02g0689132 | -1.169568434 | 0.000211884 |
| Os01g0220200 | 1.128200792 | 1.47E-19    | Os09g0483800 | -2.035413221 | 0.017624811 | Os09g0489200 | 2.32751378  | 1.90E-181   | Os07g0644100 | -1.168434074 | 3.31E-69    |
| Os06g0274300 | 1.127612703 | 2.05E-08    | Os06g0202300 | -2.035143007 | 0.002551283 | Os08g0490100 | 2.325977326 | 5.84E-178   | Os04g0508100 | -1.167876734 | 8.70E-80    |
| Os04g0667500 | 1.126060947 | 1.71E-104   | Os08g0253800 | -2.035090817 | 0.007772763 | Os10g0516701 | 2.325692905 | 1.90E-22    | Os07g0119400 | -1.16769905  | 6.49E-22    |
| Os10g0140200 | 1.12596245  | 1.00E-127   | Os06g0635500 | -2.032376676 | 1.58E-09    | Os10g0382600 | 2.325115797 | 1.10E-41    | Os09g0565200 | -1.167430739 | 3.39E-18    |
| Os08g0150600 | 1.12559012  | 2.06E-27    | Os03g0357500 | -2.031458901 | 1.20E-07    | Os10g0474000 | 2.32440498  | 1.47E-09    | Os05g0304800 | -1.166660209 | 0.001615046 |
| Os04g0620800 | 1.12521568  | 1.03E-07    | Os12g0578200 | -2.031174426 | 1.66E-292   | Os09g0260200 | 2.32395915  | 0.00265518  | Os11g0602500 | -1.166584409 | 2.22E-116   |
| Os03g0661300 | 1.124570206 | 2.59E-08    | Os10g0134500 | -2.030809662 | 0.001218647 | Os01g0558850 | 2.320759866 | 1.44E-58    | Os04g0585000 | -1.16639427  | 3.86E-09    |
| Os04g0476800 | 1.124568525 | 2.74E-156   | Os04g0428500 | -2.029739485 | 4.33E-13    | Os01g0533100 | 2.32025602  | 2.67E-13    | Os06g0176200 | -1.165208242 | 0.034604622 |
| Os06g0650600 | 1.124136225 | 2.36E-43    | Os07g0686600 | -2.028570007 | 2.40E-14    | Os07g0543500 | 2.319125073 | 0.000163009 | Os07g0573400 | -1.164848158 | 3.79E-08    |
| Os03g0406100 | 1.12315725  | 0.006665326 | Os09g0256100 | -2.028335575 | 6.39E-06    | Os05g0506200 | 2.318539204 | 3.29E-187   | Os04g0653300 | -1.16342962  | 0.044822592 |
| Os11g0151600 | 1.122624901 | 8.46E-49    | Os06g0517700 | -2.02655005  | 1.68E-24    | Os04g0503500 | 2.315240174 | 0.002625898 | Os02g0652000 | -1.162702318 | 9.54E-16    |
| Os02g0527600 | 1.122191166 | 3.33E-82    | Os09g0132900 | -2.024288663 | 6.33E-07    | Os02g0636600 | 2.315053407 | 4.18E-07    | Os07g0123500 | -1.162656022 | 6.63E-15    |
| Os06g0195900 | 1.121760335 | 1.33E-146   | Os08g0239900 | -2.023691535 | 0.01269863  | Os01g0622066 | 2.314149468 | 0.009242565 | Os01g0372700 | -1.161169258 | 1.61E-50    |
| Os07g0606600 | 1.121404351 | 0.000379892 | Os01g0257100 | -2.019287215 | 1.35E-42    | Os01g0976100 | 2.313217048 | 3.96E-23    | Os09g0369400 | -1.160127035 | 6.21E-10    |
| Os05g0360400 | 1.121220186 | 0.032201616 | Os08g0119300 | -2.012614815 | 0.009244792 | Os12g0584700 | 2.312364797 | 3.93E-05    | Os03g0128800 | -1.159592958 | 0.004821093 |
| Os10g0168900 | 1.120258861 | 5.71E-32    | Os02g0229900 | -2.010989423 | 0.000125144 | Os02g0706900 | 2.310143577 | 0.00511463  | Os03g0397500 | -1.159496251 | 0.019296145 |
| Os07g0105900 | 1.11947593  | 1.95E-17    | Os01g0668500 | -2.010558709 | 0.000539553 | Os07g0227800 | 2.309755379 | 9.80E-24    | Os07g0590700 | -1.159134401 | 2.08E-94    |
| Os03g0786400 | 1.1191371   | 7.65E-46    | Os03g0816700 | -2.010208171 | 0.034373972 | Os05g0550600 | 2.309443991 | 4.16E-21    | Os10g0104700 | -1.159128158 | 6.49E-41    |
| Os07g0287100 | 1.118868535 | 1.30E-49    | Os10g0373400 | -2.004672205 | 3.12E-20    | Os04g0150300 | 2.309212519 | 0.003274412 | Os02g0797200 | -1.157683558 | 9.02E-36    |
| Os12g0183100 | 1.118802396 | 1.92E-46    | Os04g0435000 | -2.001969953 | 0.005499152 | Os01g0121500 | 2.309015562 | 0.018195509 | Os02g0635200 | -1.157447525 | 4.30E-76    |
| Os04g0405800 | 1.117677206 | 1.67E-134   | Os02g0767300 | -2.000445189 | 2.53E-14    | Os01g0188200 | 2.307766405 | 7.63E-28    | Os10g0559800 | -1.156715393 | 4.14E-11    |
| Os01g0259900 | 1.117229721 | 0.000292372 | Os03g0254200 | -1.995906692 | 0.00020695  | Os01g0687400 | 2.304785895 | 0.008220933 | Os05g0578600 | -1.156495917 | 5.44E-10    |
| Os11g0307550 | 1.117139727 | 6.73E-46    | Os06g0146900 | -1.995795481 | 1.93E-05    | Os09g0262000 | 2.302851503 | 0.026897045 | Os03g0708400 | -1.156301341 | 1.19E-58    |
| Os12g0110300 | 1.11572502  | 5.67E-81    | Os03g0168000 | -1.993292982 | 1.02E-10    | Os04g0119300 | 2.300842199 | 4.61E-19    | Os08g0549300 | -1.155882319 | 3.71E-71    |
| Os06g0690700 | 1.115245458 | 2.72E-78    | Os05g0148400 | -1.986600615 | 9.20E-05    | Os10g0578500 | 2.297787378 | 2.17E-18    | Os02g0457600 | -1.155824017 | 0.001939147 |
| Os03g0115700 | 1.114515859 | 1.37E-79    | Os03g0379500 | -1.985450439 | 0.00023523  | Os02g0153100 | 2.297396793 | 3.81E-10    | Os03g0232000 | -1.155645583 | 2.42E-06    |
| Os01g0197500 | 1.113122167 | 2.55E-11    | Os02g0192001 | -1.98301399  | 8.56E-06    | Os11g0668100 | 2.295342141 | 0.000268664 | Os07g0691600 | -1.155359456 | 0.019875351 |
| Os04g0551500 | 1.113090015 | 2.63E-05    | Os01g0663300 | -1.980386212 | 0           | Os03g0654700 | 2.290951183 | 0.001461333 | Os09g0307400 | -1.155068136 | 4.25E-28    |
| Os07g0189700 | 1.11224081  | 2.55E-33    | Os04g0512500 | -1.979978628 | 8.63E-30    | Os01g0260500 | 2.290568305 | 5.00E-10    | Os05g0582400 | -1.154866211 | 6.60E-22    |
| Os07g0196900 | 1.112116599 | 5.07E-118   | Os06g0612550 | -1.977283653 | 0.019902233 | Os06g0295366 | 2.288669174 | 0.031881607 | Os06g0206401 | -1.153754992 | 1.37E-31    |
| Os04g0278000 | 1.11180742  | 1.92E-91    | Os06g0643000 | -1.974052329 | 0.033386144 | Os07g0102100 | 2.287076402 | 0.013140407 | Os09g0544000 | -1.153085984 | 0.046503528 |
| Os02g0108302 | 1.10921367  | 9.02E-05    | Os01g0507700 | -1.971602019 | 5.22E-24    | Os11g0680200 | 2.286505606 | 2.44E-19    | Os07g0671800 | -1.151724178 | 4.06E-102   |
| Os06g0713000 | 1.107780528 | 0.000922832 | Os05g0588700 | -1.970359018 | 1.72E-28    | Os03g0733400 | 2.286303861 | 1.58E-14    | Os06g0680700 | -1.149914875 | 6.51E-45    |
| Os02g0469300 | 1.106908472 | 7.03E-93    | Os06g0201000 | -1.966108801 | 4.68E-11    | Os01g0239200 | 2.281902097 | 6.54E-09    | Os09g0433800 | -1.149757649 | 1.52E-24    |
| Os04g0405401 | 1.106704411 | 2.39E-111   | Os05g0143600 | -1.962066174 | 9.52E-10    | Os03g0393300 | 2.280914944 | 2.96E-05    | Os04g0684600 | -1.149171663 | 9.06E-31    |
| Os03g0293850 | 1.105549303 | 2.90E-91    | Os03g0311000 | -1.959557025 | 0.001581122 | Os06g0141600 | 2.280349344 | 7.43E-23    | Os07g0549800 | -1.146619795 | 3.23E-80    |
| Os10g0561400 | 1.105021741 | 7.78E-68    | Os08g0520900 | -1.95537178  | 1.68E-101   | Os01g0199300 | 2.279719474 | 0.005663626 | Os03g0807500 | -1.146468398 | 9.37E-15    |
| Os03g0353600 | 1.104730354 | 3.27E-15    | Os01g0647200 | -1.955030043 | 3.82E-11    | Os06g0122600 | 2.278725939 | 2.33E-19    | Os12g0427600 | -1.145497528 | 6.29E-05    |
| Os09g0309200 | 1.104470449 | 1.54E-14    | Os01g0829266 | -1.953128858 | 9.88E-06    | Os01g0128700 | 2.275891431 | 1.09E-12    | Os06g0678100 | -1.144338632 | 6.96E-15    |
| Os05g0381500 | 1.104219072 | 4.50E-129   | Os04g0617700 | -1.951453315 | 1.02E-06    | Os04g0302900 | 2.275513085 | 0.0018222   | Os10g0436800 | -1.143906249 | 8.38E-27    |
| Os12g0299300 | 1.103101635 | 2.69E-153   | Os02g0657850 | -1.943993686 | 0.030984406 | Os07g0176401 | 2.275165492 | 0.015070094 | Os10g0456500 | -1.143792106 | 6.00E-32    |
| Os03g0646200 | 1.103069505 | 7.55E-29    | Os05g0167300 | -1.942380646 | 0.043336158 | Os03g0147400 | 2.274692042 | 2.28E-59    | Os02g0533700 | -1.143627041 | 0.001916249 |
| Os10g0507700 | 1.100685322 | 0.01200204  | Os03g0562400 | -1.941882074 | 5.21E-07    | Os10g0368902 | 2.273408333 | 5.20E-35    | Os12g02      |              |             |

|              |             |             |              |              |             |              |             |             |              |              |             |
|--------------|-------------|-------------|--------------|--------------|-------------|--------------|-------------|-------------|--------------|--------------|-------------|
| Os12g0607000 | 1.096719699 | 6.65E-117   | Os03g0313800 | -1.937340288 | 0.000133033 | Os02g0191000 | 2.251407541 | 1.47E-13    | Os10g0539900 | -1.140045181 | 8.26E-77    |
| Os07g0604000 | 1.096251743 | 5.42E-95    | Os08g0427550 | -1.937019632 | 0.013446363 | Os01g0846400 | 2.249187783 | 0.008097183 | Os02g0601300 | -1.139018803 | 2.77E-96    |
| Os08g0400000 | 1.095971636 | 4.34E-61    | Os04g0225100 | -1.936465495 | 6.43E-05    | Os11g0103550 | 2.248463211 | 0.042845439 | Os01g0935400 | -1.138904428 | 2.60E-11    |
| Os07g0185200 | 1.095639796 | 4.40E-127   | Os12g0127200 | -1.9346636   | 0.032719603 | Os07g0461950 | 2.244997321 | 0.000139017 | Os06g0273700 | -1.138476753 | 0.034903517 |
| Os02g0755600 | 1.095619451 | 0.008580714 | Os01g0280500 | -1.934052081 | 0.016212059 | Os04g0573100 | 2.244617686 | 2.44E-17    | Os06g0213700 | -1.138335447 | 0.043528775 |
| Os09g0509500 | 1.095561839 | 3.55E-16    | Os10g0484800 | -1.932519927 | 8.41E-05    | Os01g0637500 | 2.242871868 | 0.000564783 | Os07g0676600 | -1.138186115 | 8.75E-59    |
| Os01g0247900 | 1.094355272 | 7.66E-05    | Os06g0711700 | -1.931185776 | 6.28E-06    | Os06g0142350 | 2.241746079 | 1.35E-78    | Os04g0169500 | -1.137259656 | 5.54E-29    |
| Os06g0650300 | 1.094057361 | 5.48E-05    | Os07g0518500 | -1.929358921 | 5.79E-07    | Os01g0256500 | 2.241299484 | 2.18E-115   | Os02g0198366 | -1.136643432 | 0.034095575 |
| Os04g0531900 | 1.093848199 | 6.68E-05    | Os08g0119800 | -1.928207776 | 0.005349197 | Os11g0547800 | 2.241097728 | 5.20E-15    | Os11g0579300 | -1.135890548 | 1.42E-14    |
| Os03g0578300 | 1.093446241 | 8.36E-95    | Os01g0694000 | -1.925765329 | 0.032539418 | Os05g0147550 | 2.238315097 | 5.87E-05    | Os07g0539100 | -1.135578682 | 0.029859448 |
| Os08g0112000 | 1.093376755 | 3.95E-15    | Os02g0318200 | -1.923590614 | 5.42E-06    | Os01g0767966 | 2.23481908  | 0.042845439 | Os01g0559825 | -1.13476191  | 6.48E-18    |
| Os02g0117500 | 1.092653947 | 1.01E-27    | Os09g0339000 | -1.923476519 | 1.60E-06    | Os04g0137100 | 2.234075887 | 5.14E-161   | Os01g0846700 | -1.134106056 | 7.72E-16    |
| Os03g0424300 | 1.091125621 | 0.016173021 | Os01g0233800 | -1.923310147 | 0.009323418 | Os09g0550400 | 2.233743227 | 5.93E-23    | Os10g0416200 | -1.13323752  | 4.73E-32    |
| Os11g0245100 | 1.090937164 | 0.025785986 | Os01g0201500 | -1.922551218 | 0.020551749 | Os04g0564700 | 2.233527669 | 1.53E-290   | Os02g0491400 | -1.133056272 | 5.85E-134   |
| Os04g0389901 | 1.089872752 | 4.60E-09    | Os12g0608633 | -1.91794617  | 0.045336738 | Os01g0667900 | 2.230780568 | 5.02E-23    | Os01g0543100 | -1.132641869 | 2.49E-96    |
| Os01g0750600 | 1.089854288 | 0.016166907 | Os10g0401100 | -1.916590611 | 7.76E-06    | Os11g0643600 | 2.229908172 | 0.004192383 | Os05g0182500 | -1.132367766 | 1.11E-93    |
| Os10g0442400 | 1.089790851 | 0.007378296 | Os03g0296600 | -1.912620954 | 5.01E-21    | Os11g0467632 | 2.22943291  | 0.03548538  | Os01g0358400 | -1.131887956 | 9.45E-19    |
| Os01g0194300 | 1.089742869 | 5.60E-21    | Os04g0481700 | -1.912463335 | 0.030665169 | Os04g0543000 | 2.229008834 | 0.001703996 | Os03g0236983 | -1.131809138 | 9.29E-13    |
| Os05g0122700 | 1.088980396 | 0.000625681 | Os02g0686700 | -1.910806475 | 2.35E-18    | Os05g0550200 | 2.226740166 | 1.02E-18    | Os03g0399400 | -1.131222887 | 1.45E-31    |
| Os11g0608000 | 1.088877913 | 3.71E-40    | Os06g0666800 | -1.910619919 | 2.84E-137   | Os05g0404901 | 2.224553092 | 4.49E-06    | Os01g0102500 | -1.129882576 | 4.98E-99    |
| Os03g0730100 | 1.088090253 | 0.027567545 | Os08g0529100 | -1.908185853 | 3.71E-11    | Os09g0572700 | 2.2242308   | 0.006459776 | Os01g0978100 | -1.129750967 | 1.11E-116   |
| Os01g0136900 | 1.087575535 | 7.50E-29    | Os12g0216000 | -1.907704664 | 0.000216729 | Os06g0683400 | 2.222897015 | 1.16E-39    | Os09g0403000 | -1.129561004 | 7.87E-11    |
| Os01g0310500 | 1.08705445  | 3.83E-160   | Os10g0535600 | -1.907325692 | 0.025346909 | Os03g0701200 | 2.21747969  | 2.38E-06    | Os05g0493400 | -1.128544546 | 5.14E-12    |
| Os04g0121100 | 1.086759587 | 4.09E-16    | Os03g0582200 | -1.907294629 | 0.038610654 | Os05g0542150 | 2.214612962 | 8.50E-13    | Os11g0104050 | -1.128084928 | 2.50E-96    |
| Os04g0191600 | 1.086125545 | 9.30E-46    | Os01g0717400 | -1.903784624 | 0.040014969 | Os02g0657850 | 2.214527802 | 0.018472322 | Os06g0134900 | -1.127416191 | 1.57E-45    |
| Os12g0136900 | 1.085737203 | 2.49E-60    | Os09g0380600 | -1.901164031 | 0.000872511 | Os01g0198100 | 2.213262919 | 4.25E-43    | Os05g0148700 | -1.126270671 | 3.60E-59    |
| Os02g0122600 | 1.085453727 | 5.13E-10    | Os12g0133500 | -1.898590962 | 0.015997579 | Os02g0119000 | 2.212319478 | 0.011615492 | Os01g0788800 | -1.126229319 | 1.57E-18    |
| Os05g0101300 | 1.085236555 | 4.94E-19    | Os04g0544200 | -1.897499795 | 0.000135849 | Os03g0159150 | 2.211231402 | 1.86E-13    | Os01g0954100 | -1.125915137 | 0.009157009 |
| Os06g0350200 | 1.085101639 | 2.82E-50    | Os07g0477866 | -1.897011578 | 0.000263126 | Os01g0849950 | 2.211087217 | 0.000851455 | Os04g0475250 | -1.125330811 | 0.000103584 |
| Os04g0431200 | 1.084812108 | 5.26E-86    | Os11g0204100 | -1.894789258 | 0.003953292 | Os02g0161300 | 2.211069148 | 5.33E-29    | Os06g0567200 | -1.123961176 | 4.85E-37    |
| Os01g0124401 | 1.084234101 | 2.58E-09    | Os06g0666400 | -1.892008275 | 1.33E-09    | Os05g0324200 | 2.210736162 | 1.22E-06    | Os07g0577600 | -1.123225859 | 6.33E-60    |
| Os03g0201700 | 1.083968534 | 1.07E-61    | Os07g0588500 | -1.890581666 | 3.22E-06    | Os01g0134850 | 2.209271781 | 0.008761995 | Os06g0714300 | -1.122831068 | 0.014447873 |
| Os03g0439800 | 1.08356108  | 4.88E-121   | Os12g0427600 | -1.890330642 | 2.34E-05    | Os12g0609200 | 2.208606185 | 0.042845439 | Os05g0370600 | -1.122735879 | 4.56E-126   |
| Os08g0425800 | 1.082992432 | 6.78E-108   | Os09g0120033 | -1.890192296 | 0.026534684 | Os07g0558900 | 2.208260487 | 0.017567116 | Os04g0649500 | -1.121648399 | 3.21E-19    |
| Os06g0579600 | 1.08248927  | 4.87E-23    | Os03g0250000 | -1.88986019  | 7.58E-172   | Os12g0456100 | 2.207128865 | 5.84E-53    | Os03g0685300 | -1.121010033 | 1.39E-16    |
| Os10g0442800 | 1.08186062  | 0.000986084 | Os07g0449700 | -1.88987849  | 1.99E-09    | Os11g0307550 | 2.207025557 | 1.96E-79    | Os06g0264800 | -1.120789936 | 1.76E-16    |
| Os03g0860050 | 1.081632771 | 6.48E-06    | Os01g0238700 | -1.887996867 | 0.034718042 | Os05g0460600 | 2.206706035 | 0.009729266 | Os04g0487400 | -1.120633862 | 0.03636575  |
| Os12g0138600 | 1.080969176 | 0.015712188 | Os11g0112400 | -1.887174968 | 0.002398768 | Os06g0341400 | 2.20668466  | 1.72E-08    | Os01g0914400 | -1.120475358 | 2.82E-53    |
| Os02g0597200 | 1.08046017  | 0.001051738 | Os01g0886200 | -1.884119023 | 0.019632972 | Os02g0541150 | 2.205037282 | 0.029148371 | Os01g0264000 | -1.120124577 | 0.000139839 |
| Os05g0196200 | 1.080045258 | 1.02E-28    | Os11g0154300 | -1.882374867 | 1.70E-08    | Os06g0286700 | 2.20336044  | 9.68E-07    | Os06g0675200 | -1.120121677 | 1.56E-23    |
| Os01g0253300 | 1.079784045 | 1.90E-171   | Os01g0128300 | -1.881820925 | 4.49E-103   | Os01g0202500 | 2.202861989 | 5.17E-55    | Os03g0105000 | -1.118817691 | 1.66E-24    |
| Os08g0564300 | 1.077264768 | 4.06E-34    | Os10g0551800 | -1.877563203 | 6.39E-11    | Os03g0207475 | 2.20159986  | 0.002627235 | Os07g0558400 | -1.118416917 | 8.09E-91    |
| Os01g0623500 | 1.07719906  | 1.25E-13    | Os07g0298400 | -1.877541764 | 0.000771945 | Os01g0209500 | 2.20138616  | 1.90E-29    | Os04g0608900 | -1.118394121 | 2.99E-85    |
| Os08g0127100 | 1.075718142 | 0.010161241 | Os01g0934800 | -1.876388546 | 0.000246708 | Os12g0133201 | 2.200008902 | 0.002241607 | Os02g0516400 | -1.11808063  | 1.31E-35    |
| Os05g0499500 | 1.07520728  | 5.17E-82    | Os08g0420700 | -1.872899912 | 4.14E-53    | Os11g0170900 | 2.199368736 | 1.42E-06    | Os02g0121100 | -1.117869182 | 1.15E-147   |
| Os11g0683500 | 1.074758537 | 1.00E-30    | Os06g0601500 | -1.869909441 | 1.84E-09    | Os01g0740500 | 2.197858437 | 1.33E-59    | Os02g0586500 | -1.117780407 | 1.02E-147   |
| Os06g0174375 | 1.074675118 | 6.70E-49    | Os01g0943400 | -1.868013727 | 0.037959055 | Os06g0527300 | 2.197815381 | 2.13E-05    | Os04g0576800 | -1.117616485 | 2.62E-91    |
| Os02g0656500 | 1.074015645 | 3.82E-147   | Os07g0113300 | -1.865706448 | 7.31E-17    | Os04g0691366 | 2.197669255 | 2.67E-08    | Os10g0158700 | -1.117491207 | 1.70E-30    |
| Os03g0169600 | 1.073126959 | 8.76E-06    | Os03g0242300 | -1.865331206 | 4.35E-74    | Os09g0475800 | 2.19738213  | 6.54E-28    | Os12g0541200 | -1.117416838 | 2.97E-139   |
| Os01g0329400 | 1.072546139 | 1.90E-82    | Os05g0590100 | -1.865301664 | 0.028456596 | Os04g0670500 | 2.196870964 | 0.025105179 | Os02g0833900 | -1.1169793   | 3.29E-07    |
| Os01g0785400 | 1.072106391 | 7.82E-16    | Os06g0565200 | -1.860338402 | 0.0109337   | Os03g0164200 | 2.195477893 | 0.000444715 | Os06g0697300 | -1.116061013 | 5.59E-23    |
| Os02g0629200 | 1.071874048 | 0.00207013  | Os01g0584032 | -1.858460052 | 0.00243998  | Os10g0155450 | 2.195257581 | 8.05E-06    | Os09g0420700 | -1.115503369 | 7.36E-99    |
| Os08g0225050 | 1.07100136  | 3.10E-22    | Os08g0500700 | -1.858291427 | 0           | Os09g0249100 | 2.194378185 | 0.000214468 | Os05g0190300 | -1.115367799 | 1.18E-16    |
| Os08g0305100 | 1.070629528 | 1.37E-09    | Os09g0481000 | -1.857249474 | 0.03815574  | Os08g0520550 | 2.193737806 | 2.05E-42    | Os09g0539800 | -1.113661788 | 2.31E-74    |
| Os04g0678700 | 1.070261943 | 8.13E-115   | Os03g0849900 | -1.855977947 | 0.000570091 | Os05g0475700 | 2.193229237 | 0.042845439 | Os03g0655700 | -1.11340607  | 8.31E-45    |
| Os03g0387900 | 1.069574436 | 3.83E-122   | Os07g0631200 | -1.855304674 | 1.36E-08    | Os11g0586001 | 2.191786513 | 4.46E-18    | Os05g0565000 | -1.113267985 | 5.79E-74    |
| Os05g0320300 | 1.06692024  | 1.00E-115   | Os01g0715600 | -1.853658454 | 4.40E-20    | Os06g0693100 | 2.19066021  | 0.001029928 | Os02g0257500 | -1.112239312 | 5.33E-15    |
| Os01g0944000 | 1.066844297 | 1.31E-48    | Os02g0709350 | -1.853477871 | 3.05E-09    | Os01g0656250 | 2.189526465 | 4.65E-05    | Os03g0110800 | -1.112230822 | 4.58E-09    |
| Os10g0566200 | 1.066511274 | 9.17E-16    | Os12g0584700 | -1.851959061 | 6.93E-05    | Os01g0650800 | 2.189285758 | 3.93E-21    | Os06g0531900 | -1.112044002 | 1.38E-10    |
| Os03g0302800 | 1.065785568 | 0.000312491 | Os07g0593400 | -1.851882309 | 1.34E-11    | Os11g0599466 | 2.188289565 | 0.002750589 | Os12g0566300 | -1.111865352 | 8.12E-88    |
| Os07g0568700 | 1.065778651 | 3.08E-132   | Os01g0720500 | -1.851666037 | 1.72E-187   | Os08g0268550 | 2.187450593 | 8.77E-25    | Os09g0501700 | -1.111600331 | 0.0142345   |
| Os03g0777600 | 1.065706972 | 7.71E-19    | Os05g0231100 | -1.851508092 | 0.002919581 | Os01g0815900 | 2.184574881 | 9.92E-05    | Os05g0363600 | -1.111182531 | 1.32E-34    |
| Os11g0119311 | 1.063857556 | 9.32E-11    | Os04g0591300 | -1.849993467 | 3.59E-24    | Os02g0107300 | 2.184572586 | 5.51E-05    | Os01g0869800 | -1.110436104 | 3.55E-05    |
| Os01g0239300 | 1.063358166 | 0.036408444 | Os12g0225900 | -1.848074361 | 1.44E-05    | Os04g0675200 | 2.184544499 | 3.61E-82    | Os04g0504800 | -1.109817001 | 7.59E-175   |
| Os06g0720400 | 1.062864792 | 0.014754645 | Os03g0154300 | -1.847331384 | 0.023197176 | Os07g0669200 | 2.183868052 | 2.74E-13    | Os02g0662100 | -1.109642563 | 1.04E-163   |
| Os08g0109400 | 1.060747114 | 8.73E-30    | Os10g0203000 | -1.846725413 | 1.62E-186   |              |             |             |              |              |             |



|              |             |             |              |              |             |              |             |             |              |              |             |
|--------------|-------------|-------------|--------------|--------------|-------------|--------------|-------------|-------------|--------------|--------------|-------------|
| Os09g0485500 | 1.058395363 | 0.04654009  | Os08g0364400 | -1.842938397 | 0.032448954 | Os01g0846300 | 2.178455819 | 4.83E-95    | Os01g0977250 | -1.1024893   | 7.71E-16    |
| Os06g0554800 | 1.057543134 | 6.08E-63    | Os02g0311800 | -1.842834823 | 0.011701563 | Os06g0199100 | 2.17833506  | 1.05E-61    | Os03g0803100 | -1.102339761 | 4.10E-39    |
| Os01g0668400 | 1.057354193 | 8.60E-12    | Os03g0145050 | -1.842647642 | 0.021748587 | Os04g0432800 | 2.177954381 | 6.01E-12    | Os01g0864000 | -1.101895404 | 3.23E-14    |
| Os04g0520700 | 1.057304356 | 2.00E-54    | Os05g0303700 | -1.841987283 | 0.000160065 | Os01g0253900 | 2.1772092   | 2.70E-27    | Os03g0320600 | -1.101280269 | 7.06E-18    |
| Os03g0324300 | 1.057129152 | 3.40E-82    | Os01g0590800 | -1.840725472 | 6.10E-10    | Os01g0552000 | 2.175539252 | 6.99E-29    | Os07g0615400 | -1.100797756 | 1.07E-104   |
| Os11g0707300 | 1.056878786 | 1.05E-06    | Os02g0639500 | -1.839888099 | 5.51E-43    | Os07g0121750 | 2.174998867 | 1.02E-09    | Os01g0931600 | -1.100649272 | 0.002472686 |
| Os05g0257100 | 1.056256302 | 8.47E-15    | Os02g0681100 | -1.838408897 | 0.029645693 | Os01g0747300 | 2.174246657 | 5.32E-85    | Os06g0121400 | -1.100051434 | 0.000522591 |
| Os06g0612800 | 1.055826375 | 9.97E-137   | Os03g0275700 | -1.837823525 | 0.043765854 | Os09g0240975 | 2.173921514 | 4.54E-13    | Os01g0711000 | -1.099720788 | 1.15E-41    |
| Os09g0246900 | 1.054700403 | 2.92E-11    | Os02g0510400 | -1.837663368 | 3.29E-05    | Os08g0425200 | 2.172754516 | 8.12E-32    | Os05g0516800 | -1.099151594 | 2.65E-24    |
| Os03g0790600 | 1.054103491 | 1.12E-08    | Os09g0569900 | -1.837434241 | 0.047556948 | Os11g0473200 | 2.172175829 | 4.95E-10    | Os05g0420600 | -1.098974012 | 2.57E-149   |
| Os06g0166000 | 1.053801254 | 0.000107622 | Os01g0788200 | -1.837067065 | 1.88E-21    | Os02g0234450 | 2.171875743 | 4.56E-06    | Os08g0137200 | -1.0989636   | 7.51E-108   |
| Os03g0203200 | 1.053412281 | 1.38E-55    | Os01g0544200 | -1.837015534 | 0.00671971  | Os02g0767300 | 2.171088362 | 5.02E-18    | Os03g0244600 | -1.098745034 | 1.42E-23    |
| Os01g0614700 | 1.053016651 | 7.35E-06    | Os04g0220501 | -1.835261831 | 0.001046684 | Os05g0370900 | 2.166718529 | 0.004233562 | Os12g0560400 | -1.098283293 | 7.21E-27    |
| Os02g0822900 | 1.052443228 | 0.003465506 | Os02g0218500 | -1.834417081 | 5.00E-05    | Os06g0652550 | 2.166011063 | 2.00E-05    | Os05g0200500 | -1.098129646 | 8.96E-88    |
| Os01g0962000 | 1.051811103 | 4.20E-17    | Os11g0594500 | -1.833310117 | 0.039348843 | Os04g0389901 | 2.163199756 | 5.32E-10    | Os08g0471000 | -1.09759001  | 4.15E-09    |
| Os10g0359500 | 1.050714435 | 6.07E-71    | Os02g0187000 | -1.832565253 | 0.023506058 | Os05g0176700 | 2.161590164 | 7.99E-222   | Os03g0109800 | -1.097526637 | 0.011510814 |
| Os03g0247200 | 1.050361546 | 2.22E-17    | Os04g0392700 | -1.832467052 | 0.015444438 | Os01g0583300 | 2.16030141  | 7.44E-75    | Os04g0386600 | -1.097478598 | 5.31E-104   |
| Os01g0317125 | 1.05030531  | 0.007728315 | Os01g0686000 | -1.830591516 | 0.000219928 | Os03g0242300 | 2.158754407 | 1.73E-100   | Os03g0685500 | -1.097124552 | 2.13E-144   |
| Os02g0533300 | 1.0492939   | 1.68E-10    | Os11g0518600 | -1.830449869 | 6.06E-68    | Os06g0102800 | 2.157709915 | 6.90E-18    | Os10g0563900 | -1.097030286 | 2.94E-12    |
| Os04g0534200 | 1.049287373 | 0.020318344 | Os09g0498500 | -1.827543384 | 7.36E-37    | Os08g0215400 | 2.157541208 | 0.000874382 | Os03g0371000 | -1.096332763 | 0.040765177 |
| Os03g0817200 | 1.048730798 | 0.000730318 | Os04g0344400 | -1.826964203 | 1.81E-06    | Os03g0826800 | 2.156393678 | 1.09E-25    | Os10g0209566 | -1.095796406 | 3.39E-13    |
| Os03g0719800 | 1.048710001 | 9.90E-96    | Os11g0186900 | -1.824244907 | 0.023466372 | Os01g0203900 | 2.155560444 | 0.0457146   | Os07g0166600 | -1.095338885 | 4.97E-143   |
| Os09g0418000 | 1.047081788 | 2.43E-08    | Os08g0241300 | -1.822366508 | 4.95E-21    | Os01g0634900 | 2.154700473 | 0.01640969  | Os12g0576700 | -1.094511688 | 1.02E-45    |
| Os02g0474000 | 1.046995959 | 3.20E-63    | Os10g0466800 | -1.82077718  | 5.68E-39    | Os01g0685650 | 2.154196712 | 1.80E-27    | Os07g0692900 | -1.094440946 | 3.84E-05    |
| Os02g0772650 | 1.04651245  | 0.019732321 | Os05g0282900 | -1.82039923  | 9.33E-07    | Os03g0107700 | 2.153947735 | 8.13E-65    | Os08g0193200 | -1.094288027 | 9.87E-32    |
| Os07g0296100 | 1.046443644 | 9.35E-10    | Os09g0255000 | -1.819390719 | 1.93E-71    | Os10g0525500 | 2.152118183 | 0.039551222 | Os03g0832200 | -1.092450322 | 2.77E-26    |
| Os09g0532700 | 1.045922009 | 1.58E-62    | Os03g0201800 | -1.819087369 | 0.001287925 | Os12g0191200 | 2.150266882 | 3.17E-105   | Os01g0121600 | -1.09039447  | 4.11E-35    |
| Os12g0152750 | 1.045111536 | 6.78E-08    | Os03g0448950 | -1.819016232 | 0.007860108 | Os06g0147100 | 2.148416385 | 2.46E-49    | Os03g0363800 | -1.09033174  | 5.79E-41    |
| Os04g0457300 | 1.044479766 | 0.004256491 | Os08g0441500 | -1.81709147  | 9.92E-135   | Os11g0104220 | 2.147170874 | 0.003114883 | Os09g0532700 | -1.090080503 | 6.43E-69    |
| Os03g0808300 | 1.044123152 | 1.79E-15    | Os12g0461300 | -1.814963621 | 0.047493038 | Os07g0633400 | 2.146899809 | 0.000107385 | Os02g0167600 | -1.089538831 | 1.89E-26    |
| Os11g0605500 | 1.043563566 | 1.31E-64    | Os05g0385400 | -1.814918887 | 0.031607843 | Os02g0543200 | 2.144041235 | 0.000297798 | Os03g0826200 | -1.08935633  | 8.17E-05    |
| Os10g0406350 | 1.042414644 | 0.00932067  | Os09g0551000 | -1.814675635 | 0.035161457 | Os07g0418700 | 2.143085238 | 1.24E-20    | Os04g0414700 | -1.089093673 | 3.12E-65    |
| Os10g0579900 | 1.04189331  | 7.41E-05    | Os03g0393350 | -1.813364985 | 5.39E-18    | Os03g0171300 | 2.140792221 | 2.08E-09    | Os10g0480200 | -1.088888846 | 1.84E-109   |
| Os03g0238700 | 1.041674727 | 2.83E-14    | Os08g0550200 | -1.812328591 | 0.00333888  | Os01g0210750 | 2.1395987   | 0.001157087 | Os03g0281500 | -1.088508152 | 0.006097962 |
| Os12g0109900 | 1.040700685 | 7.81E-46    | Os03g0421700 | -1.811872238 | 0.045428816 | Os03g0688000 | 2.138863553 | 5.29E-15    | Os09g0474300 | -1.088400991 | 1.68E-126   |
| Os10g0484700 | 1.040634277 | 2.32E-67    | Os03g0702900 | -1.810882231 | 0.000817666 | Os11g0219400 | 2.137852599 | 9.82E-06    | Os03g0145050 | -1.088160537 | 0.006491704 |
| Os09g0482600 | 1.040395484 | 5.34E-07    | Os12g0169000 | -1.809654624 | 6.62E-36    | Os12g0566250 | 2.136943508 | 9.56E-150   | Os07g0546100 | -1.087567085 | 1.43E-05    |
| Os04g0560700 | 1.038431287 | 2.76E-10    | Os01g0764800 | -1.80807772  | 0.020069108 | Os05g0537200 | 2.136404978 | 3.29E-14    | Os03g0162200 | -1.087341347 | 1.02E-102   |
| Os11g0655000 | 1.038230652 | 4.44E-76    | Os07g0178700 | -1.807418129 | 0.000370718 | Os01g0383100 | 2.135438729 | 0.001215538 | Os03g0581650 | -1.086702063 | 6.21E-45    |
| Os07g0409900 | 1.037338532 | 4.70E-119   | Os10g0562200 | -1.807267691 | 0.030829402 | Os01g0739500 | 2.132293033 | 2.55E-60    | Os04g0645100 | -1.084211357 | 4.50E-125   |
| Os02g0181700 | 1.036289075 | 0.037243132 | Os07g0505200 | -1.806904945 | 1.27E-07    | Os09g0261400 | 2.132255271 | 1.81E-19    | Os08g0552000 | -1.083596989 | 6.36E-05    |
| Os01g0357800 | 1.036197299 | 1.01E-90    | Os10g0145000 | -1.80638622  | 0.010062984 | Os10g0423501 | 2.132224484 | 0.011616883 | Os03g0304500 | -1.083522757 | 3.86E-118   |
| Os05g0103000 | 1.03553654  | 8.09E-45    | Os07g0607400 | -1.803658895 | 0.000177413 | Os10g0501700 | 2.131182917 | 0.01507557  | Os02g0826600 | -1.081455809 | 1.52E-40    |
| Os01g0386700 | 1.033894148 | 3.99E-98    | Os05g0433100 | -1.80320691  | 0.002519495 | Os01g0714600 | 2.131110124 | 1.22E-07    | Os08g0464000 | -1.080268157 | 4.75E-83    |
| Os02g0204201 | 1.031789322 | 1.44E-07    | Os01g0307686 | -1.801378784 | 0.021293804 | Os03g0764500 | 2.129949335 | 8.12E-05    | Os07g0160600 | -1.080043174 | 1.07E-40    |
| Os10g0132700 | 1.031637041 | 2.29E-17    | Os08g0441100 | -1.800671556 | 1.19E-132   | Os12g0615600 | 2.129401399 | 2.44E-08    | Os10g0150700 | -1.079710373 | 1.12E-19    |
| Os02g0736800 | 1.030888934 | 5.64E-20    | Os02g0689000 | -1.797912189 | 0.029248326 | Os07g0121200 | 2.129388527 | 0.003430993 | Os01g0926400 | -1.079279001 | 1.08E-10    |
| Os12g0594200 | 1.030188753 | 8.94E-05    | Os11g0540800 | -1.796760157 | 1.82E-10    | Os11g0689400 | 2.129038474 | 5.42E-16    | Os08g0421825 | -1.078824393 | 7.25E-16    |
| Os03g0624000 | 1.02995503  | 0.049735374 | Os03g0267100 | -1.794171157 | 0.001875431 | Os10g0180600 | 2.128790314 | 0.000146864 | Os06g0604200 | -1.078801785 | 2.09E-32    |
| Os01g0619900 | 1.029562069 | 0.006400526 | Os06g0143100 | -1.793673084 | 4.18E-18    | Os03g0554950 | 2.128335186 | 3.36E-17    | Os01g0922100 | -1.078643124 | 2.38E-74    |
| Os11g0634200 | 1.028722799 | 2.64E-12    | Os10g0157400 | -1.793170091 | 0.022166292 | Os03g0789466 | 2.127791544 | 5.29E-21    | Os06g0608050 | -1.078118485 | 1.23E-16    |
| Os08g0483800 | 1.028524593 | 1.29E-14    | Os03g0775700 | -1.788579334 | 0.035476961 | Os07g0184200 | 2.126377528 | 1.16E-05    | Os03g0681750 | -1.07739729  | 1.23E-50    |
| Os11g0438000 | 1.028144775 | 4.68E-38    | Os07g0640300 | -1.787075643 | 1.43E-05    | Os04g0611600 | 2.12591662  | 2.36E-15    | Os01g0771200 | -1.07731509  | 1.59E-52    |
| Os08g0554400 | 1.028125022 | 3.91E-59    | Os02g0128000 | -1.786926306 | 0.004261555 | Os04g0373400 | 2.124700881 | 0.000372611 | Os01g0121700 | -1.077130884 | 6.75E-77    |
| Os05g0104900 | 1.027810033 | 2.20E-64    | Os02g0694100 | -1.784639705 | 1.26E-41    | Os05g0518101 | 2.123707513 | 0.029284234 | Os11g0223400 | -1.076661785 | 4.48E-35    |
| Os11g0292050 | 1.027734735 | 8.98E-93    | Os08g0552200 | -1.782990308 | 0.03988916  | Os02g0581400 | 2.123300179 | 1.48E-115   | Os03g0647600 | -1.076603119 | 3.78E-40    |
| Os05g0195200 | 1.026296551 | 1.10E-51    | Os11g0474450 | -1.782473149 | 0.000230829 | Os10g0539700 | 2.123290285 | 0.015414301 | Os07g0475700 | -1.076368583 | 0.000253108 |
| Os06g0661766 | 1.026232395 | 6.99E-61    | Os01g0872300 | -1.781683354 | 0.000137247 | Os03g0593200 | 2.122491454 | 4.90E-35    | Os01g0559100 | -1.076159098 | 3.43E-35    |
| Os01g0857900 | 1.026229682 | 6.79E-49    | Os10g0386300 | -1.78081274  | 9.63E-85    | Os01g0819300 | 2.121925245 | 4.80E-08    | Os02g0168300 | -1.074507677 | 3.33E-22    |
| Os12g0459300 | 1.026110531 | 5.98E-81    | Os07g0539200 | -1.779966667 | 5.25E-06    | Os05g0492600 | 2.118430355 | 0.0495796   | Os09g0111100 | -1.074385568 | 2.54E-64    |
| Os05g0557200 | 1.026091222 | 1.18E-85    | Os12g0447932 | -1.77995418  | 0.03255533  | Os10g0322032 | 2.11828584  | 0.025105179 | Os02g0261100 | -1.072374196 | 4.62E-106   |
| Os08g0550700 | 1.025420288 | 1.12E-05    | Os08g0161800 | -1.779624525 | 0.00067972  | Os02g0813000 | 2.117967953 | 3.11E-18    | Os06g0590301 | -1.072301587 | 3.52E-24    |
| Os05g0414501 | 1.024904712 | 3.94E-151   | Os07g0637050 | -1.777380645 | 0.026923626 | Os10g0141400 | 2.117928602 | 0.000256641 | Os11g0186900 | -1.071979607 | 0.048389613 |
| Os01g0840900 | 1.024666006 | 3.83E-25    | Os06g0518100 | -1.776786959 | 1.79E-08    | Os11g0102500 | 2.117852398 | 0.002551739 | Os04g0259200 | -1.071891977 | 1.76E-13    |
| Os06g0705600 | 1.024603004 | 0.001336485 | Os12g0528801 | -1.775155091 | 0.004735267 | Os03g0208750 | 2.117137735 | 0.046853435 | Os11g0245650 | -1.069663817 | 0.000443036 |
| Os05g0269100 | 1.023418221 | 9.14E-95    | Os01g0930500 | -1.774652584 | 5.17E-07</  |              |             |             |              |              |             |

|              |             |             |              |               |             |              |             |                       |              |              |             |
|--------------|-------------|-------------|--------------|---------------|-------------|--------------|-------------|-----------------------|--------------|--------------|-------------|
| Os07g0124650 | 1.022141587 | 0.006842679 | Os02g0303500 | -1.770385362  | 0.001552518 | Os02g0801300 | 2.109805183 | 7.79E-10              | Os02g0123400 | -1.066028745 | 6.28E-06    |
| Os04g0465300 | 1.021793881 | 1.14E-100   | Os01g0542700 | -1.770353365  | 8.10E-07    | Os02g0256800 | 2.109780834 | 0.021963991           | Os08g0237000 | -1.06553767  | 1.02E-65    |
| Os05g0501350 | 1.020853853 | 2.76E-16    | Os05g0457200 | -1.769937096  | 2.15E-12    | Os07g0684100 | 2.109359436 | 2.62913723364798e-311 | Os08g0500800 | -1.064974053 | 6.93E-55    |
| Os04g0461400 | 1.020295101 | 1.14E-42    | Os06g0291500 | -1.76972589   | 0.047963799 | Os03g0204500 | 2.107685189 | 6.19E-13              | Os04g0559700 | -1.064969387 | 2.60E-54    |
| Os10g0502000 | 1.020289576 | 5.79E-40    | Os08g0474000 | -1.767945274  | 2.15E-21    | Os04g0446750 | 2.105558882 | 7.03E-14              | Os11g0222000 | -1.064116655 | 8.47E-12    |
| Os01g0318700 | 1.020271628 | 0.012143967 | Os01g0318000 | -1.766884556  | 0.000183358 | Os12g0570075 | 2.104978756 | 2.14E-09              | Os03g0598100 | -1.063882524 | 0.002798739 |
| Os04g0565900 | 1.019730281 | 9.89E-10    | Os01g0648600 | -1.763796767  | 1.26E-06    | Os09g0344900 | 2.104694559 | 6.48E-06              | Os09g0414500 | -1.063757174 | 6.19E-08    |
| Os12g0264500 | 1.019604824 | 2.13E-128   | Os06g0683700 | -1.763635586  | 2.41E-06    | Os03g0286900 | 2.104673568 | 0.002933127           | Os11g0155900 | -1.063420749 | 0.002310172 |
| Os11g0525600 | 1.019115287 | 1.26E-138   | Os01g0361700 | -1.763611121  | 0.000668436 | Os07g0236300 | 2.10412056  | 5.07E-09              | Os10g0550725 | -1.062806022 | 4.38E-23    |
| Os08g0556300 | 1.019013476 | 0.001989467 | Os01g0293100 | -1.762733633  | 5.17E-76    | Os10g0521000 | 2.103183396 | 7.41E-74              | Os02g0786500 | -1.062365426 | 5.71E-11    |
| Os10g0566050 | 1.018673628 | 9.05E-06    | Os12g0156200 | -1.761981754  | 8.65E-88    | Os05g0593550 | 2.102242051 | 1.86E-10              | Os02g0203000 | -1.062303284 | 4.09E-11    |
| Os11g0118950 | 1.018645717 | 1.78E-05    | Os10g0529300 | -1.760619596  | 3.73E-21    | Os08g0175700 | 2.102196784 | 0.00612061            | Os02g0162600 | -1.060458254 | 4.38E-51    |
| Os06g0698785 | 1.017987022 | 1.14E-09    | Os07g0568800 | -1.760306112  | 1.48E-11    | Os03g0651201 | 2.101978166 | 4.41E-09              | Os08g0430500 | -1.06037338  | 1.41E-156   |
| Os03g0713200 | 1.017071332 | 4.16E-07    | Os05g0464200 | -1.758582495  | 1.05E-10    | Os02g0709350 | 2.100101637 | 3.61E-09              | Os05g0475400 | -1.059535625 | 4.03E-13    |
| Os12g0274700 | 1.016882156 | 8.63E-08    | Os06g0264700 | -1.75649239   | 6.42E-05    | Os07g0674800 | 2.099943203 | 0.025852384           | Os11g0157000 | -1.058540029 | 0.000475117 |
| Os06g0558766 | 1.015741097 | 4.94E-50    | Os06g0492750 | -1.755762552  | 0.000531906 | Os09g0569900 | 2.097966322 | 0.005462963           | Os09g0442400 | -1.05831341  | 0.000501736 |
| Os05g0332801 | 1.015420978 | 0.027337178 | Os10g0432400 | -1.754560933  | 0.002315655 | Os11g0137300 | 2.097385469 | 1.11E-25              | Os09g0250150 | -1.057467492 | 9.44E-30    |
| Os07g0669650 | 1.015133811 | 2.09E-10    | Os01g0891033 | -1.75108501   | 0.002889423 | Os02g0215500 | 2.096033539 | 0.002227629           | Os01g0716400 | -1.056632783 | 2.33E-10    |
| Os01g0357100 | 1.01510833  | 2.72E-18    | Os07g0185900 | -1.748144135  | 1.61E-94    | Os02g0766700 | 2.095996952 | 0                     | Os05g0161200 | -1.056011845 | 2.28E-34    |
| Os03g0783051 | 1.014948998 | 7.65E-86    | Os07g0659600 | -1.747881064  | 0.032718109 | Os01g0609200 | 2.094085828 | 2.14E-05              | Os07g0101800 | -1.055978023 | 3.09E-11    |
| Os04g0444800 | 1.014698463 | 2.10E-33    | Os03g0723400 | -1.747486427  | 2.96E-33    | Os12g0109800 | 2.092329823 | 0.033047873           | Os08g0535000 | -1.054558452 | 2.85E-09    |
| Os01g0269500 | 1.014623595 | 4.11E-26    | Os07g0446800 | -1.745004255  | 0.00031189  | Os02g0139600 | 2.09208206  | 0.001513027           | Os03g0572900 | -1.054367443 | 6.62E-19    |
| Os05g0472300 | 1.013842136 | 2.08E-90    | Os07g0298700 | -1.744117354  | 2.82E-25    | Os02g0577501 | 2.091621395 | 4.64E-10              | Os10g0564200 | -1.053636166 | 6.70E-28    |
| Os04g0541900 | 1.013304132 | 6.31E-31    | Os01g0690200 | -1.742428395  | 0.01241623  | Os10g0162100 | 2.090627434 | 1.27E-43              | Os12g0157700 | -1.053405876 | 2.49E-90    |
| Os01g0286100 | 1.011487607 | 1.33E-18    | Os06g0707800 | -1.741421178  | 3.33E-82    | Os04g0553650 | 2.090489233 | 8.29E-77              | Os08g0154900 | -1.052994248 | 6.59E-28    |
| Os02g0649400 | 1.011431831 | 0.014950666 | Os12g0606600 | -1.738094946  | 7.52E-43    | Os11g0120300 | 2.090008264 | 3.99E-13              | Os08g0482300 | -1.052855446 | 5.35E-31    |
| Os02g0302200 | 1.011170682 | 2.51E-27    | Os07g0181700 | -1.736767445  | 0.00066986  | Os02g0531450 | 2.087441567 | 2.07E-08              | Os12g0590900 | -1.05245408  | 2.29E-15    |
| Os03g0835400 | 1.010677432 | 1.10E-23    | Os10g0521000 | -1.736172815  | 5.94E-57    | Os09g0256100 | 2.087362795 | 0.000361602           | Os11g0525200 | -1.052229666 | 1.69E-142   |
| Os04g0578400 | 1.009871677 | 1.14E-14    | Os07g0122350 | -1.735394207  | 0.001725018 | Os02g0114033 | 2.085892088 | 1.38E-39              | Os02g0445100 | -1.05208657  | 1.39E-13    |
| Os03g0674700 | 1.009642914 | 0.000358673 | Os09g0329200 | -1.734853227  | 0.001553191 | Os01g0702500 | 2.08518705  | 1.15E-15              | Os09g0451000 | -1.051112498 | 0.002823436 |
| Os01g0886300 | 1.009418085 | 6.09E-83    | Os11g0153500 | -1.732762749  | 0.011843789 | Os10g0542400 | 2.083172737 | 0.003224521           | Os10g0503100 | -1.050919675 | 3.02E-10    |
| Os04g0579200 | 1.009223714 | 1.48E-36    | Os06g0158800 | -1.732380869  | 3.74E-06    | Os03g0214200 | 2.082259565 | 0                     | Os03g0757400 | -1.050638653 | 1.72E-05    |
| Os08g0155000 | 1.008429073 | 1.56E-76    | Os04g0364800 | -1.731429204  | 0.000217694 | Os06g0187950 | 2.081751663 | 7.23E-42              | Os03g0776100 | -1.050222582 | 3.23E-06    |
| Os11g0704700 | 1.006916505 | 4.81E-56    | Os04g0538000 | -1.731328048  | 2.38E-16    | Os03g0326100 | 2.081537549 | 4.22E-05              | Os02g0174200 | -1.049929321 | 4.46E-39    |
| Os03g0685700 | 1.006660965 | 5.85E-07    | Os09g0364800 | -1.729603411  | 1.11E-20    | Os04g0225100 | 2.079572978 | 0.000108469           | Os08g0561500 | -1.049817217 | 5.29E-104   |
| Os08g0414700 | 1.005668966 | 3.13E-38    | Os03g0670800 | -1.728715421  | 0.011989099 | Os02g0579800 | 2.077127153 | 1.00E-35              | Os01g0931200 | -1.049322794 | 4.34E-126   |
| Os05g0105900 | 1.005159442 | 3.31E-87    | Os01g0563000 | -1.727275405  | 0.025866248 | Os05g0304501 | 2.077077787 | 0.010859522           | Os05g0556400 | -1.048712533 | 6.46E-34    |
| Os07g0532600 | 1.004680702 | 8.87E-06    | Os07g0188700 | -1.726945651  | 0.029720005 | Os09g0314500 | 2.077023494 | 0.044353147           | Os09g0502000 | -1.048457844 | 4.05E-78    |
| Os04g0488100 | 1.004470391 | 3.48E-81    | Os09g0458300 | -1.725512389  | 7.42E-18    | Os09g0356000 | 2.074327319 | 0.041377326           | Os02g0105400 | -1.047918477 | 1.83E-21    |
| Os02g0528550 | 1.004399506 | 0.000224897 | Os12g0184167 | -1.725263714  | 0.037550021 | Os09g0530500 | 2.07262501  | 1.11E-21              | Os04g0280200 | -1.047763649 | 0.032476987 |
| Os01g0900800 | 1.004295132 | 7.09E-42    | Os01g0630900 | -1.724468881  | 0.009072367 | Os10g0506900 | 2.070595512 | 0                     | Os02g0667100 | -1.047728561 | 2.75E-25    |
| Os06g0122600 | 1.004292328 | 1.11E-05    | Os12g0410150 | -1.723031843  | 4.55E-06    | Os06g0542000 | 2.069728198 | 1.16E-25              | Os04g0639000 | -1.046721817 | 3.33E-07    |
| Os02g0640600 | 1.004216979 | 7.22E-11    | Os03g0243950 | -1.720762686  | 0.029509341 | Os01g0187900 | 2.068474279 | 1.11E-30              | Os09g0417400 | -1.046564439 | 8.06E-36    |
| Os05g0163500 | 1.003133747 | 0.000192322 | Os10g0517800 | -1.720378017  | 9.75E-10    | Os01g0135600 | 2.067427009 | 0.00116685            | Os05g0368300 | -1.04631468  | 9.66E-37    |
| Os07g0676200 | 1.002487453 | 1.67E-98    | Os10g0452700 | -1.719896186  | 0.014767155 | Os11g0213500 | 2.067400191 | 3.74E-16              | Os12g0569300 | -1.045324446 | 3.01E-49    |
| Os04g0492500 | 1.001912258 | 1.33E-08    | Os04g0498000 | -1.719369247  | 1.08E-09    | Os01g0925100 | 2.067236118 | 1.01E-08              | Os09g0530000 | -1.044950845 | 2.66E-18    |
| Os04g0308100 | 1.000879617 | 2.13E-05    | Os04g0554200 | -1.718605644  | 5.83E-07    | Os12g0500800 | 2.064184005 | 1.09E-55              | Os10g0478200 | -1.044739521 | 8.11E-146   |
| Os02g0479300 | 1.000656234 | 8.56E-55    | Os04g0200000 | -1.718396955  | 9.22E-08    | Os12g0114000 | 2.063590888 | 0.025231099           | Os06g0114500 | -1.044490314 | 2.26E-122   |
| Os12g0637800 | 1.000580687 | 0.000638265 | Os01g0972200 | -1.71789686   | 1.27E-09    | Os10g0209700 | 2.063479445 | 0.006657212           | Os08g0199400 | -1.04348886  | 3.16E-72    |
| Os06g0639100 | 1.000231962 | 6.47E-91    | Os06g0201500 | -1.717642849  | 0.005871688 | Os06g0716000 | 2.06249838  | 2.02E-07              | Os01g0863500 | -1.042508531 | 8.55E-44    |
|              |             |             | Os10g0213700 | -1.717610857  | 0.000105989 | Os03g0288101 | 2.060442523 | 9.46E-19              | Os06g0609450 | -1.042197902 | 7.14E-90    |
|              |             |             | Os06g0145400 | -1.717252846  | 0.009416904 | Os11g0182100 | 2.059175591 | 0.022235848           | Os07g0661600 | -1.041957038 | 3.28E-33    |
|              |             |             | Os01g0637300 | -1.716448231  | 1.54E-06    | Os03g0432200 | 2.058887379 | 3.31E-07              | Os10g0369600 | -1.040961843 | 1.66E-40    |
|              |             |             | Os08g0203400 | -1.716380588  | 5.36E-06    | Os03g0634400 | 2.057043517 | 0.028615994           | Os12g0237000 | -1.040152712 | 0.000329229 |
|              |             |             | Os04g0137100 | -1.715516932  | 7.49E-95    | Os02g0316800 | 2.056703302 | 0.002111813           | Os07g0602200 | -1.040152244 | 5.21E-138   |
|              |             |             | Os07g0547700 | -1.713446221  | 0.012949014 | Os02g0654600 | 2.056201066 | 7.63E-10              | Os08g0178800 | -1.040057807 | 4.76E-49    |
|              |             |             | Os04g0480802 | -1.712606399  | 0.041866857 | Os03g0235400 | 2.056047545 | 2.16E-11              | Os10g0551200 | -1.038758032 | 4.39E-58    |
|              |             |             | Os12g0594600 | -1.711756675  | 3.96E-51    | Os03g0244466 | 2.055966595 | 0.000480413           | Os02g0768100 | -1.037477276 | 0.008894737 |
|              |             |             | Os01g0621200 | -1.7111142379 | 9.83E-05    | Os09g0425900 | 2.053899252 | 0.000219831           | Os03g0837900 | -1.036978938 | 1.37E-11    |
|              |             |             | Os06g0139800 | -1.709967994  | 1.01E-23    | Os03g0241800 | 2.05306836  | 1.09E-12              | Os08g0191100 | -1.03639863  | 2.91E-145   |
|              |             |             | Os02g0784700 | -1.709725832  | 1.19E-290   | Os07g0684800 | 2.052884053 | 0.000281849           | Os08g0151400 | -1.03598073  | 1.19E-93    |
|              |             |             | Os07g0282401 | -1.709404263  | 0.010636675 | Os06g0351500 | 2.051648712 | 0.002773584           | Os12g0600100 | -1.035293524 | 2.10E-33    |
|              |             |             | Os02g0715000 | -1.70701777   | 1.80E-17    | Os01g0652000 | 2.051610082 | 0.011699333           | Os02g0197125 | -1.035278635 | 0.002457856 |
|              |             |             | Os10g0405300 | -1.705072004  | 8.04E-63    | Os01g0318600 | 2.051279875 | 1.06E-16              | Os07g0593332 | -1.035125429 | 1.50E-79    |
|              |             |             | Os09g0498200 | -1.704445357  | 4.25E-06    | Os04g0481000 | 2.051125092 | 5.57E-31              | Os01g0589200 | -1.034993094 | 8.02E-07    |
|              |             |             | Os04g0293600 | -1.703825503  | 4.10E-08    | Os11g0556132 | 2.050223081 | 5.29E-12              | Os09g0293601 | -1.034479116 | 1.44E-94    |
|              |             |             | Os07g0188000 | -1.702666776  | 6.60E-05    | Os03g0741100 | 2.050179645 | 2.34E-06              | Os09g0466400 | -1.034296517 | 2.26E-68    |
|              |             |             | Os08g0448000 | -1.702186928  | 1.75E-06    | Os11g0220400 | 2.050149269 | 6.51E-15              | Os03g0747100 | -1.034158942 | 1.16E-57    |
|              |             |             | Os05g0153500 | -1.701335887  | 0.000995751 | Os06g0122500 | 2.050006337 | 6.43E-21              | Os04g0429450 | -1.032889876 | 3.32E-78    |
|              |             |             |              |               |             |              |             |                       |              |              |             |

|              |              |             |              |             |             |              |              |             |
|--------------|--------------|-------------|--------------|-------------|-------------|--------------|--------------|-------------|
| Os08g0442200 | -1.6974547   | 0.021965949 | Os01g0359600 | 2.047560928 | 0.004741024 | Os11g0142101 | -1.030327007 | 5.65E-14    |
| Os06g0676700 | -1.697004705 | 0.000915497 | Os04g0538166 | 2.047364607 | 0.005980074 | Os04g0544200 | -1.029653007 | 0.002585099 |
| Os04g0422300 | -1.696962678 | 1.15E-07    | Os03g0766100 | 2.046218228 | 4.87E-05    | Os01g0254200 | -1.029058637 | 1.40E-46    |
| Os05g0359000 | -1.695269555 | 6.37E-45    | Os04g0428500 | 2.043866028 | 1.18E-16    | Os05g0188700 | -1.028701852 | 1.57E-13    |
| Os07g0212200 | -1.695167166 | 4.27E-16    | Os11g0531800 | 2.042898682 | 1.76E-09    | Os10g0496900 | -1.028424434 | 3.64E-50    |
| Os03g0790500 | -1.695153325 | 1.76E-08    | Os02g0161050 | 2.042237269 | 0.040034443 | Os01g0749300 | -1.028272753 | 6.26E-18    |
| Os03g0610900 | -1.694726228 | 1.20E-55    | Os03g0790600 | 2.041151094 | 1.53E-14    | Os06g0720700 | -1.02805607  | 1.07E-07    |
| Os03g0240600 | -1.694001047 | 1.30E-08    | Os11g0686400 | 2.040130196 | 0.006619448 | Os11g0242700 | -1.027763165 | 2.50E-97    |
| Os02g0767050 | -1.69296418  | 4.95E-10    | Os12g0215950 | 2.03950897  | 2.09E-14    | Os02g0125300 | -1.027750489 | 6.55E-55    |
| Os06g0718100 | -1.691956571 | 1.35E-61    | Os03g0711525 | 2.037254059 | 5.66E-19    | Os05g0398100 | -1.027314196 | 3.16E-31    |
| Os01g0691000 | -1.691441227 | 0.003741256 | Os07g0619600 | 2.037230003 | 5.67E-36    | Os12g0162800 | -1.026442102 | 4.61E-06    |
| Os06g0699800 | -1.68973301  | 7.78E-05    | Os05g0381400 | 2.037160113 | 0.005551833 | Os03g0780200 | -1.026362105 | 1.86E-105   |
| Os03g0332533 | -1.688331398 | 2.84E-14    | Os12g0603800 | 2.034880181 | 3.51E-05    | Os10g0411100 | -1.025878777 | 1.08E-17    |
| Os08g0425200 | -1.687392561 | 1.17E-12    | Os06g0143500 | 2.029632366 | 5.14E-15    | Os05g0513100 | -1.025151278 | 3.47E-33    |
| Os02g0751600 | -1.686533048 | 7.22E-13    | Os08g0241300 | 2.028841738 | 9.35E-35    | Os04g0627000 | -1.024131849 | 1.53E-137   |
| Os11g0539200 | -1.68492815  | 5.48E-190   | Os10g0532100 | 2.026339239 | 1.01E-33    | Os04g0540600 | -1.023828483 | 1.80E-64    |
| Os02g0654600 | -1.68320593  | 4.38E-06    | Os04g0512900 | 2.0258173   | 1.05E-14    | Os04g0673700 | -1.022150551 | 2.40E-74    |
| Os04g0439600 | -1.682003826 | 0.006384253 | Os07g0132600 | 2.024040786 | 0.022235848 | Os08g0187500 | -1.021114372 | 6.57E-116   |
| Os01g0863300 | -1.68008821  | 7.50E-33    | Os08g0527700 | 2.023677402 | 0.000280396 | Os09g0480700 | -1.020720943 | 3.02E-26    |
| Os02g0732350 | -1.677853325 | 0.031878193 | Os03g0363700 | 2.023015358 | 7.63E-34    | Os09g0505800 | -1.020588036 | 1.49E-93    |
| Os03g0276500 | -1.67724064  | 9.88E-147   | Os02g0125500 | 2.022935858 | 1.92E-06    | BAC19903     | -1.020522453 | 0.009075572 |
| Os11g0672700 | -1.675385346 | 7.46E-28    | Os06g0583600 | 2.021818384 | 2.45E-06    | Os09g0279200 | -1.01955857  | 1.04E-10    |
| Os01g0760900 | -1.674393548 | 3.84E-120   | Os02g0514326 | 2.02159053  | 3.26E-08    | Os10g0403000 | -1.019123568 | 2.12E-06    |
| Os05g0103300 | -1.67261507  | 0.012050529 | Os08g0153700 | 2.02149884  | 0.019332833 | Os04g0658800 | -1.017117487 | 3.31E-06    |
| Os12g0488300 | -1.671203749 | 0.000236327 | Os06g0201000 | 2.020819695 | 4.13E-11    | Os01g0869500 | -1.016998467 | 1.53E-14    |
| Os04g0581800 | -1.670403187 | 1.32E-29    | Os08g0404350 | 2.020030985 | 2.34E-09    | Os09g0266600 | -1.016484228 | 3.07E-09    |
| Os11g0467966 | -1.668630943 | 0.023855902 | Os01g0717601 | 2.014868196 | 0.002021921 | Os07g0627800 | -1.014926006 | 7.07E-100   |
| Os11g0643600 | -1.66775401  | 0.014234937 | Os07g0206750 | 2.013384999 | 7.74E-09    | Os03g0422300 | -1.014426436 | 0.04012983  |
| Os01g0868900 | -1.664863565 | 1.74E-09    | Os12g0552300 | 2.013369617 | 1.86E-15    | Os03g0204300 | -1.014193747 | 8.47E-29    |
| Os04g0382900 | -1.664606692 | 0.021445411 | Os01g0637300 | 2.011385756 | 7.25E-05    | Os10g0167250 | -1.014183991 | 3.52E-05    |
| Os12g0487832 | -1.664467781 | 0.001747535 | Os03g0381500 | 2.01083176  | 3.47E-07    | Os02g0747400 | -1.013940536 | 1.73E-42    |
| Os09g0260900 | -1.663918708 | 6.52E-09    | Os06g0481200 | 2.010701833 | 2.78E-05    | Os03g0729000 | -1.01306981  | 0.000225337 |
| Os08g0193900 | -1.662401747 | 1.81E-29    | Os04g0129350 | 2.009703143 | 0.020189143 | Os01g0521500 | -1.012806944 | 7.45E-20    |
| Os01g0546000 | -1.661986303 | 5.77E-06    | Os01g0582600 | 2.008933677 | 1.60E-54    | Os03g0351500 | -1.012756725 | 1.05E-135   |
| Os03g0304800 | -1.66038109  | 5.90E-97    | Os07g0203275 | 2.008859072 | 2.81E-17    | Os01g0777400 | -1.012573378 | 6.09E-18    |
| Os10g0524300 | -1.659338333 | 4.88E-06    | Os04g0404900 | 2.008571086 | 1.41E-22    | Os06g0565200 | -1.01253114  | 0.034274233 |
| Os02g0209300 | -1.659284235 | 0.000254829 | Os11g0678400 | 2.006883119 | 6.94E-07    | Os03g0221500 | -1.011742153 | 1.72E-115   |
| Os05g0484800 | -1.658936152 | 1.64E-14    | Os02g0744200 | 2.004330005 | 3.41E-35    | Os08g0108100 | -1.011357484 | 4.01E-16    |
| Os08g0546300 | -1.658164237 | 5.44E-05    | Os04g0607566 | 2.003295052 | 0.000685873 | Os07g0685000 | -1.010067259 | 1.37E-34    |
| Os05g0490600 | -1.657505712 | 0.044515099 | Os06g0698802 | 2.002912473 | 3.52E-05    | Os04g0386300 | -1.00970566  | 5.03E-41    |
| Os05g0544600 | -1.657188547 | 0.013586905 | Os07g0580900 | 2.002222613 | 1.16E-107   | Os07g0669650 | -1.009193467 | 7.55E-11    |
| Os07g0579100 | -1.655631256 | 0.010417219 | Os07g0409500 | 2.000468633 | 3.96E-10    | Os06g0232300 | -1.008122056 | 8.99E-09    |
| Os02g0578400 | -1.654719218 | 0.000756083 | Os09g0549425 | 1.996003788 | 9.56E-07    | Os07g0496700 | -1.008098616 | 2.24E-16    |
| Os03g0759600 | -1.654644404 | 2.09E-07    | Os08g0530300 | 1.995813267 | 0.044040131 | Os09g0414900 | -1.007234708 | 0.000475255 |
| Os08g0525800 | -1.65363222  | 0.000678071 | Os03g0306400 | 1.995045988 | 2.52E-23    | Os04g0405100 | -1.00637523  | 2.53E-58    |
| Os10g0431700 | -1.653431134 | 0.001231313 | Os02g0749100 | 1.994609114 | 1.16E-09    | Os03g0685750 | -1.005933572 | 6.13E-25    |
| Os03g0719400 | -1.651801393 | 1.58E-16    | Os02g0101750 | 1.992944457 | 9.81E-38    | Os07g0486500 | -1.005385574 | 1.27E-66    |
| Os02g0536300 | -1.651763617 | 1.04E-08    | Os09g0376800 | 1.992015807 | 8.88E-55    | Os08g0198800 | -1.005193969 | 0.002774523 |
| Os04g0331650 | -1.649671915 | 0.001032077 | Os07g0671200 | 1.988955719 | 5.54E-08    | Os05g0500900 | -1.005187788 | 8.15E-25    |
| Os01g0869800 | -1.649249284 | 9.16E-06    | Os01g0660200 | 1.988368871 | 0.010910123 | Os10g0553600 | -1.004689077 | 8.52E-14    |
| Os05g0527100 | -1.648944555 | 0.040775385 | Os07g0569550 | 1.988014799 | 2.88E-14    | Os06g0101600 | -1.004415442 | 2.17E-23    |
| Os07g0107583 | -1.648799728 | 0.000406373 | Os07g0438500 | 1.987321658 | 4.95E-59    | Os09g0463300 | -1.002969674 | 7.88E-70    |
| Os02g0253150 | -1.646170805 | 0.007313151 | Os11g0647866 | 1.986257124 | 0.00012028  | Os01g0498300 | -1.002953921 | 0.03937212  |
| Os09g0434900 | -1.644524307 | 0.042750763 | Os02g0514700 | 1.984242139 | 0.036808266 | Os09g0370000 | -1.002293489 | 0.000281692 |
| Os08g0144100 | -1.642892918 | 0.000602579 | Os03g0796700 | 1.983803815 | 0.003051868 | Os10g0580001 | -1.002292082 | 4.99E-49    |
| Os02g0191200 | -1.642047288 | 0.009082633 | Os08g0121975 | 1.982568338 | 0.000703187 | Os04g0521700 | -1.002215701 | 8.61E-18    |
| Os01g0718000 | -1.641619255 | 2.87E-07    | Os01g0303000 | 1.981632885 | 3.38E-30    | Os09g0566400 | -1.002049506 | 8.28E-21    |
| Os05g0467900 | -1.641488986 | 6.96E-12    | Os07g0134600 | 1.981433966 | 1.82E-09    | Os10g0442000 | -1.001583676 | 2.53E-10    |
| Os01g0340600 | -1.641100115 | 0.042951658 | Os10g0131100 | 1.981302564 | 1.75E-17    | Os03g0659300 | -1.001001014 | 1.19E-09    |
| Os06g0239100 | -1.640539138 | 0.0481471   | Os06g0505302 | 1.979600711 | 1.25E-14    | Os01g0831000 | -1.000197903 | 5.45E-07    |
| Os07g0106200 | -1.640393964 | 0.011596546 | Os02g0768750 | 1.978654254 | 2.02E-42    | Os04g0525000 | -1.000062583 | 0.033321569 |
| Os04g0277400 | -1.63975094  | 2.42E-14    | Os02g0645100 | 1.978366241 | 9.64E-51    |              |              |             |
| Os03g0417800 | -1.638842077 | 9.46E-22    | Os08g0175600 | 1.978285042 | 3.98E-58    |              |              |             |
| Os06g0152800 | -1.638098651 | 7.31E-17    | Os03g0352450 | 1.978185549 | 4.98E-13    |              |              |             |
| Os01g0649900 | -1.636975726 | 7.39E-05    | Os10g0106550 | 1.97794504  | 4.17E-06    |              |              |             |
| Os03g0124000 | -1.636219154 | 0.007275276 | Os02g0527500 | 1.976417736 | 0.017875866 |              |              |             |
| Os02g0763800 | -1.634272971 | 0.039143192 | Os07g0559700 | 1.975960004 | 4.20E-14    |              |              |             |
| Os11g0474800 | -1.632840629 | 0.000393258 | Os06g0221000 | 1.973832373 | 0.000475845 |              |              |             |
| Os02g0766700 | -1.632824589 | 7.16E-243   | Os01g0307562 | 1.973200951 | 9.34E-06    |              |              |             |
| Os08g0502600 | -1.631396647 | 9.63E-05    | Os02g0305800 | 1.972120251 | 1.22E-23    |              |              |             |
| Os02g0299200 | -1.631072981 | 6.61E-18    | Os02g0579600 | 1.972012707 | 4.52E-19    |              |              |             |

|              |              |             |              |             |             |
|--------------|--------------|-------------|--------------|-------------|-------------|
| Os04g0526800 | -1.630045377 | 2.49E-14    | Os11g0605500 | 1.968259227 | 3.06E-87    |
| Os06g0128700 | -1.629540193 | 4.58E-07    | Os02g0527200 | 1.966882398 | 2.34E-11    |
| Os01g0847300 | -1.629150956 | 7.75E-08    | Os11g0215300 | 1.966447313 | 0.003913354 |
| Os04g0475200 | -1.628603332 | 0.007793656 | Os01g0800250 | 1.964673883 | 0.019823119 |
| Os11g0104220 | -1.623523502 | 0.002891828 | Os10g0381800 | 1.964370955 | 5.35E-16    |
| Os04g0223901 | -1.62245206  | 0.001714258 | Os10g0559650 | 1.964038678 | 1.68E-95    |
| Os02g0563000 | -1.622418066 | 0.000116536 | Os02g0537775 | 1.963157711 | 2.52E-07    |
| Os01g0651800 | -1.622343118 | 2.51E-12    | Os06g0493801 | 1.962295935 | 2.13E-25    |
| Os07g0162900 | -1.622057717 | 2.04E-27    | Os05g0444750 | 1.961760416 | 2.43E-09    |
| Os04g0359300 | -1.621287463 | 0.012758705 | Os02g0527300 | 1.961167442 | 3.81E-80    |
| Os02g0649900 | -1.620186842 | 8.85E-39    | Os10g0567100 | 1.961085343 | 5.17E-11    |
| Os01g0595900 | -1.619079225 | 1.35E-12    | Os11g0225000 | 1.960628228 | 0.000423609 |
| Os09g0367900 | -1.61818309  | 1.19E-50    | Os03g0674700 | 1.958206681 | 1.49E-05    |
| Os09g0484200 | -1.617616091 | 1.34E-276   | Os07g0516801 | 1.958153527 | 0.000768733 |
| Os03g0336900 | -1.615678886 | 6.32E-07    | Os11g0660300 | 1.957689102 | 2.98E-06    |
| Os12g0626000 | -1.615287439 | 0.000341203 | Os11g0114800 | 1.957682144 | 2.27E-08    |
| Os12g0418200 | -1.615093518 | 7.80E-08    | Os05g0524100 | 1.954953734 | 5.02E-90    |
| Os06g0613200 | -1.614872282 | 0.000653    | Os01g0263400 | 1.954357803 | 1.62E-22    |
| Os03g0651800 | -1.614065802 | 0.003063378 | Os10g0447400 | 1.95367206  | 0.004467943 |
| Os04g0603400 | -1.613593603 | 6.55E-26    | Os05g0126400 | 1.952736152 | 3.51E-118   |
| Os03g0117900 | -1.613094493 | 8.46E-06    | Os09g0429400 | 1.952158764 | 3.09E-05    |
| Os03g0832200 | -1.612295216 | 6.95E-30    | Os03g0188200 | 1.952076402 | 1.47E-19    |
| Os02g0551600 | -1.612149728 | 0.000740599 | Os06g0637400 | 1.950891045 | 5.09E-12    |
| Os03g0710700 | -1.611889629 | 1.07E-62    | Os01g0713900 | 1.950353615 | 2.47E-07    |
| Os03g0341300 | -1.610663645 | 0.046341031 | Os04g0517350 | 1.949222796 | 8.13E-08    |
| Os07g0559700 | -1.609139561 | 3.19E-10    | Os05g0100500 | 1.949155967 | 8.87E-31    |
| Os03g0300600 | -1.609010445 | 5.07E-120   | Os12g0233200 | 1.947920955 | 4.31E-08    |
| Os01g0798800 | -1.608837073 | 0.000322248 | Os08g0542800 | 1.946559608 | 0.01838885  |
| Os01g0158400 | -1.607186903 | 0.018594735 | Os01g0655250 | 1.946000332 | 1.80E-24    |
| Os09g0483400 | -1.606396312 | 3.89E-110   | Os07g0534100 | 1.945577075 | 2.03E-27    |
| Os01g0772100 | -1.6063576   | 0.000425933 | Os06g0133000 | 1.945306435 | 0.004868778 |
| Os04g0604000 | -1.604198593 | 0.017562977 | Os08g0327501 | 1.944809102 | 3.41E-08    |
| Os09g0449000 | -1.603494991 | 0.000151132 | Os04g0420900 | 1.944249534 | 1.03E-09    |
| Os12g0140700 | -1.603451968 | 0.022063169 | Os01g0385400 | 1.942709354 | 1.87E-05    |
| Os12g0507400 | -1.603234928 | 2.14E-06    | Os03g0308900 | 1.94187642  | 1.69E-16    |
| Os11g0506800 | -1.602905234 | 0.000392751 | Os07g0203900 | 1.941521025 | 2.54E-12    |
| Os01g0884800 | -1.602698387 | 2.57E-05    | Os11g0415450 | 1.94130915  | 1.17E-05    |
| Os06g0548000 | -1.60121027  | 1.56E-21    | Os06g0201500 | 1.941055213 | 0.007591625 |
| Os07g0187001 | -1.600878753 | 3.75E-08    | Os01g0589900 | 1.940801953 | 3.70E-25    |
| Os01g0609700 | -1.600732905 | 0.001494841 | Os02g0302500 | 1.940567828 | 3.12E-11    |
| Os02g0516800 | -1.600675634 | 0.003667845 | Os01g0158800 | 1.940107187 | 0.013640445 |
| Os07g0274700 | -1.599461648 | 9.52E-10    | Os01g0176300 | 1.939940631 | 7.27E-11    |
| Os03g0578900 | -1.599124881 | 0.017763705 | Os03g0683900 | 1.93955783  | 1.38E-06    |
| Os04g0445300 | -1.598980143 | 0.009260798 | Os09g0505850 | 1.938514609 | 0.035840765 |
| Os02g0775300 | -1.598944798 | 1.61E-17    | Os03g0217000 | 1.938365561 | 0.01578669  |
| Os06g0356800 | -1.598475938 | 0.045196727 | Os05g0313600 | 1.93835083  | 8.08E-06    |
| Os09g0418375 | -1.598336999 | 0.037383057 | Os04g0476600 | 1.938287636 | 5.52E-08    |
| Os12g0441700 | -1.594528794 | 4.44E-06    | Os04g0497000 | 1.937503296 | 1.23E-18    |
| Os03g0181750 | -1.594229635 | 9.26E-12    | Os03g0285800 | 1.929965641 | 9.97E-27    |
| Os08g0514033 | -1.593739879 | 0.000320142 | Os07g0190600 | 1.929177044 | 1.89E-18    |
| Os08g0193700 | -1.592863815 | 0.000214272 | Os10g0392400 | 1.928821678 | 3.32E-07    |
| Os04g0502100 | -1.592717013 | 0.022554022 | Os07g0151700 | 1.92854733  | 2.18E-05    |
| Os01g0952000 | -1.592617512 | 7.20E-10    | Os08g0543051 | 1.925961695 | 7.75E-05    |
| Os01g0244000 | -1.592267818 | 2.27E-37    | Os09g0532400 | 1.925085666 | 0           |
| Os04g0690800 | -1.592225531 | 1.04E-07    | Os05g0525900 | 1.922432336 | 3.96E-47    |
| Os05g0410500 | -1.589220671 | 9.77E-09    | Os08g0267450 | 1.921433957 | 0.044941009 |
| Os07g0517100 | -1.588291164 | 2.64E-10    | Os08g0469750 | 1.921375639 | 0.000331954 |
| Os11g0635500 | -1.587592564 | 1.48E-06    | Os03g0151300 | 1.920519326 | 2.04E-36    |
| Os02g0559300 | -1.583565652 | 2.12E-07    | Os03g0116700 | 1.919061245 | 9.15E-45    |
| Os07g0151700 | -1.583209538 | 2.21E-05    | Os03g0432666 | 1.918960701 | 0.015364074 |
| Os03g0206400 | -1.582280739 | 3.77E-27    | Os12g0105962 | 1.918834991 | 5.50E-11    |
| Os04g0530200 | -1.581503549 | 5.42E-14    | Os07g0157700 | 1.917190162 | 7.28E-11    |
| Os01g0692200 | -1.581260119 | 4.31E-08    | Os02g0732600 | 1.914151261 | 1.86E-13    |
| Os02g0115700 | -1.580305618 | 6.65E-07    | Os09g0121000 | 1.914107879 | 1.94E-24    |
| Os02g0492800 | -1.57989938  | 3.12E-06    | Os01g0272700 | 1.91339142  | 0.00245233  |
| Os02g0116400 | -1.579672856 | 0.010014909 | Os11g0209700 | 1.913222332 | 2.40E-110   |
| Os10g0209700 | -1.57943386  | 0.031288918 | Os07g0534300 | 1.911717437 | 0.004700394 |
| Os01g0937200 | -1.578434641 | 3.26E-09    | Os02g0203500 | 1.911162812 | 7.83E-10    |
| Os01g0826000 | -1.577672337 | 1.23E-16    | Os01g0134700 | 1.910380857 | 1.09E-05    |
| Os05g0366900 | -1.575871631 | 1.10E-39    | Os04g0405900 | 1.909169319 | 1.99E-08    |
| Os03g0269500 | -1.573845043 | 6.20E-07    | Os08g0491000 | 1.909016894 | 1.48E-15    |

|              |              |             |              |             |             |
|--------------|--------------|-------------|--------------|-------------|-------------|
| Os05g0115100 | -1.573593658 | 3.75E-38    | Os02g0258800 | 1.908450632 | 1.52E-05    |
| Os07g0573200 | -1.573577443 | 0.00021641  | Os07g0188700 | 1.907682355 | 0.025945274 |
| Os02g0627800 | -1.57338574  | 8.13E-06    | Os04g0307500 | 1.906507128 | 0.026451277 |
| Os04g0435100 | -1.573280483 | 0.001500595 | Os02g0710102 | 1.90587097  | 2.64E-49    |
| Os04g0465600 | -1.572476267 | 2.81E-140   | Os04g0170500 | 1.905557832 | 1.42E-17    |
| Os04g0350700 | -1.572021417 | 1.82E-30    | Os08g0360300 | 1.904682329 | 0.000483099 |
| Os05g0435400 | -1.571872744 | 2.31E-05    | Os04g0510200 | 1.902040706 | 1.74E-69    |
| Os06g0198500 | -1.571020395 | 5.22E-24    | Os02g0153700 | 1.901433524 | 4.29E-22    |
| Os02g0786900 | -1.569844405 | 7.71E-24    | Os03g0680566 | 1.900567917 | 0.000561768 |
| Os03g0188200 | -1.568643938 | 4.03E-17    | Os12g0169950 | 1.900430044 | 2.85E-07    |
| Os01g0691050 | -1.567882369 | 1.09E-09    | Os04g0173800 | 1.899019801 | 5.11E-05    |
| Os03g0263600 | -1.567127371 | 0.00812735  | Os01g0128250 | 1.897909623 | 4.06E-18    |
| Os06g0499100 | -1.566841039 | 8.48E-06    | Os02g0497600 | 1.897491829 | 8.78E-05    |
| Os04g0420300 | -1.565826282 | 5.81E-09    | Os01g0264100 | 1.896240913 | 1.72E-05    |
| Os05g0595100 | -1.564608225 | 9.80E-16    | Os08g0525900 | 1.896026513 | 9.01E-31    |
| Os06g0502800 | -1.563785471 | 1.10E-19    | Os04g0420600 | 1.895407716 | 3.09E-06    |
| Os05g0143700 | -1.563677114 | 1.61E-10    | Os03g0764300 | 1.894442437 | 0.017395218 |
| Os03g0745600 | -1.563326005 | 0.000344892 | Os10g0195175 | 1.893593606 | 1.26E-09    |
| Os09g0541000 | -1.563257233 | 3.05E-10    | Os01g0367100 | 1.88785965  | 1.80E-07    |
| Os02g0125400 | -1.562995615 | 0.001254993 | Os02g0607500 | 1.887216627 | 0.000939096 |
| Os09g0557500 | -1.562432124 | 2.71E-07    | Os03g0236200 | 1.886157797 | 2.31E-21    |
| Os04g0677200 | -1.561122373 | 7.23E-05    | Os04g0683900 | 1.885751612 | 3.29E-138   |
| Os06g0614100 | -1.560448666 | 0.001808623 | Os08g0325134 | 1.883029425 | 3.79E-05    |
| Os05g0270500 | -1.560283695 | 1.89E-06    | Os12g0511500 | 1.882223261 | 3.75E-14    |
| Os06g0518300 | -1.559936912 | 0.002116645 | Os01g0273200 | 1.882016466 | 0.001484402 |
| Os03g0724600 | -1.559920031 | 4.61E-55    | Os11g0671000 | 1.881443502 | 2.18E-299   |
| Os06g0187300 | -1.559807347 | 0.007971152 | Os11g0629566 | 1.880135611 | 0.014246408 |
| Os10g0153900 | -1.559742712 | 2.28E-16    | Os01g0877400 | 1.87836355  | 3.12E-08    |
| Os08g0546800 | -1.559408725 | 2.39E-31    | Os05g0290300 | 1.877709819 | 3.55E-18    |
| Os12g0553800 | -1.556326446 | 2.11E-08    | Os06g0113150 | 1.877529708 | 5.16E-20    |
| Os07g0216700 | -1.555374967 | 6.14E-05    | Os09g0442100 | 1.877379075 | 6.09E-10    |
| Os09g0381800 | -1.552979345 | 0.008764897 | Os02g0101900 | 1.877334615 | 9.55E-05    |
| Os05g0189425 | -1.55238033  | 0.00080406  | Os07g0649200 | 1.877282233 | 4.12E-08    |
| Os04g0365100 | -1.552308511 | 6.58E-05    | Os11g0673000 | 1.874870243 | 4.07E-11    |
| Os05g0427200 | -1.550610374 | 1.67E-69    | Os03g0861900 | 1.871363357 | 7.86E-10    |
| Os03g0283900 | -1.549731349 | 7.50E-08    | Os02g0518600 | 1.86995393  | 0.021241896 |
| Os03g0726300 | -1.547562238 | 0.014597683 | Os12g0631600 | 1.868076759 | 6.31E-08    |
| Os12g0536300 | -1.544302803 | 4.90E-05    | Os04g0688500 | 1.867220882 | 0.010129962 |
| Os07g0586100 | -1.542979445 | 0.000954461 | Os08g0130100 | 1.866445385 | 2.02E-08    |
| Os05g0480000 | -1.542380761 | 9.16E-16    | Os02g0201800 | 1.86640928  | 0.000503403 |
| Os03g0812400 | -1.54206119  | 0.001039012 | Os02g0665800 | 1.866143472 | 8.96E-11    |
| Os09g0462100 | -1.541776654 | 0.049127467 | Os05g0549800 | 1.864454375 | 0.027679901 |
| Os08g0208200 | -1.541322286 | 0.000571114 | Os01g0777700 | 1.863079397 | 3.53E-31    |
| Os07g0418700 | -1.540337562 | 2.93E-17    | Os07g0523700 | 1.863041513 | 6.71E-06    |
| Os09g0292350 | -1.54020574  | 0.000514665 | Os06g0109500 | 1.861584906 | 8.02E-05    |
| Os12g0215100 | -1.539678272 | 0.031185892 | Os01g0642000 | 1.860077855 | 1.10E-11    |
| Os02g0593100 | -1.538427771 | 2.39E-12    | Os03g0421250 | 1.860030025 | 1.55E-09    |
| Os02g0566300 | -1.537378701 | 5.13E-87    | Os06g0690900 | 1.85806071  | 9.13E-22    |
| Os07g0120300 | -1.537121167 | 0.003385698 | Os02g0809500 | 1.857442884 | 0.008310401 |
| Os04g0640200 | -1.536865473 | 6.85E-13    | Os11g0118000 | 1.856536947 | 5.95E-06    |
| Os01g0128200 | -1.536714883 | 1.78E-13    | Os08g0457400 | 1.856178809 | 0.002389123 |
| Os09g0443000 | -1.536395741 | 3.37E-06    | Os10g0497432 | 1.855960418 | 7.70E-23    |
| Os01g0243901 | -1.536338713 | 4.77E-07    | Os03g0700400 | 1.855491395 | 4.14E-10    |
| Os04g0429300 | -1.536329761 | 0.015488338 | Os09g0557800 | 1.854857621 | 2.35E-70    |
| Os08g0154250 | -1.536238819 | 4.20E-08    | Os03g0363600 | 1.854788457 | 1.38E-17    |
| Os02g0621600 | -1.535637046 | 1.65E-101   | Os04g0355401 | 1.854652265 | 1.38E-22    |
| Os03g0797400 | -1.534724644 | 2.18E-07    | Os06g0562700 | 1.853271838 | 2.62E-21    |
| Os06g0696566 | -1.53212612  | 2.76E-40    | Os01g0922700 | 1.852795085 | 0.002251114 |
| Os03g0204900 | -1.531580604 | 1.00E-05    | Os06g0551000 | 1.85172867  | 0.001260819 |
| Os02g0642200 | -1.53131332  | 2.89E-09    | Os02g0204201 | 1.850694148 | 2.91E-09    |
| Os12g0292400 | -1.531004757 | 3.49E-05    | Os11g0527150 | 1.850085753 | 1.09E-08    |
| Os05g0116000 | -1.528451478 | 2.49E-143   | Os01g0691000 | 1.849624134 | 0.000159556 |
| Os06g0192000 | -1.528436795 | 0.001195851 | Os03g0813700 | 1.845948929 | 8.78E-10    |
| Os08g0104900 | -1.528195545 | 7.78E-15    | Os10g0134250 | 1.845670847 | 0.002756388 |
| Os05g0460475 | -1.525690648 | 0.003061736 | Os01g0595725 | 1.844347945 | 1.41E-08    |
| Os03g0788700 | -1.52544676  | 4.02E-05    | Os09g0500151 | 1.843603408 | 1.07E-10    |
| Os04g0606000 | -1.524398822 | 1.28E-07    | Os12g0242500 | 1.841618166 | 7.69E-46    |
| Os06g0220500 | -1.522822827 | 0.015261235 | Os02g0741500 | 1.841168878 | 7.83E-22    |
| Os01g0124900 | -1.522224018 | 0.004136539 | Os07g0614250 | 1.840105439 | 8.90E-27    |
| Os02g0767600 | -1.521501191 | 0.0106993   | Os08g0249675 | 1.839249863 | 0.000658423 |
| Os01g0871900 | -1.521177016 | 0.000417431 | Os06g0168150 | 1.839105161 | 0.001708501 |

|              |              |             |              |             |             |
|--------------|--------------|-------------|--------------|-------------|-------------|
| Os04g0645500 | -1.520735475 | 0.000144692 | Os03g0686300 | 1.838993905 | 4.03E-43    |
| Os03g0679800 | -1.519576683 | 1.05E-34    | Os04g0416450 | 1.838937867 | 1.15E-14    |
| Os12g0262700 | -1.518418445 | 0.03939451  | Os01g0766966 | 1.838729412 | 2.89E-06    |
| Os10g0420400 | -1.517302075 | 0.023448421 | Os01g0113200 | 1.837495734 | 9.94E-17    |
| Os02g0520100 | -1.515274439 | 1.20E-20    | Os01g0540800 | 1.8368351   | 3.93E-70    |
| BAC19886     | -1.515214753 | 1.70E-05    | Os01g0357100 | 1.836076878 | 8.27E-19    |
| Os01g0136300 | -1.512785887 | 2.99E-06    | Os02g0830801 | 1.835378992 | 6.89E-15    |
| Os02g0658000 | -1.512093525 | 1.48E-41    | Os03g0268200 | 1.834814846 | 6.81E-08    |
| Os01g0788800 | -1.511699952 | 2.71E-16    | Os04g0163700 | 1.834479206 | 1.07E-22    |
| Os08g0267800 | -1.51115453  | 2.22E-09    | Os02g0211200 | 1.833036264 | 0.001271242 |
| Os09g0323500 | -1.510827313 | 1.30E-09    | Os08g0553500 | 1.832627596 | 7.97E-05    |
| Os01g0388000 | -1.51009735  | 9.67E-44    | Os04g0641400 | 1.832513065 | 0.000202671 |
| Os05g0515900 | -1.509896212 | 3.15E-53    | Os09g0514550 | 1.82931488  | 6.78E-16    |
| Os01g0689900 | -1.508293207 | 1.26E-51    | Os03g0685700 | 1.827869695 | 1.87E-15    |
| Os02g0576600 | -1.508155455 | 9.03E-05    | Os07g0130000 | 1.827448101 | 3.51E-05    |
| Os07g0660000 | -1.507979754 | 0.003486448 | Os06g0679750 | 1.827174609 | 1.24E-06    |
| Os12g0601500 | -1.506210458 | 1.88E-07    | Os01g0192300 | 1.825886587 | 0.002324261 |
| Os04g0545250 | -1.506141931 | 5.04E-14    | Os02g0553802 | 1.824691306 | 1.83E-19    |
| Os05g0370300 | -1.505778982 | 0.026463724 | Os11g0236100 | 1.823231583 | 0.001123008 |
| Os05g0336000 | -1.504719063 | 0.027172893 | Os05g0464001 | 1.821681781 | 4.73E-17    |
| Os12g0488700 | -1.50440192  | 0.000226163 | Os08g0546300 | 1.820866627 | 0.000889855 |
| Os05g0462700 | -1.503734346 | 1.96E-71    | Os08g0536300 | 1.820472149 | 4.59E-161   |
| Os05g0176700 | -1.503698588 | 3.39E-113   | Os04g0290450 | 1.820331198 | 6.64E-05    |
| Os11g0539000 | -1.503594618 | 7.69E-07    | Os07g0669800 | 1.819886703 | 4.45E-40    |
| Os01g0620900 | -1.502531396 | 6.68E-07    | Os04g0375750 | 1.819619791 | 9.34E-05    |
| Os05g0172800 | -1.502420523 | 3.07E-08    | Os07g0154400 | 1.81959583  | 7.94E-35    |
| Os02g0180900 | -1.500871925 | 0.005157006 | Os01g0332700 | 1.818946084 | 0.048615133 |
| Os06g0194200 | -1.500614233 | 6.12E-18    | Os09g0548400 | 1.818681089 | 2.03E-06    |
| Os01g0844700 | -1.500348938 | 9.57E-05    | Os03g0191700 | 1.817913379 | 2.12E-08    |
| Os04g0657500 | -1.499942963 | 4.27E-15    | Os09g0520000 | 1.817619722 | 1.58E-43    |
| Os12g0134300 | -1.498855587 | 1.48E-07    | Os01g0614750 | 1.817578744 | 0.038025844 |
| Os07g0591400 | -1.498016095 | 2.11E-06    | Os02g0832400 | 1.817351152 | 1.20E-44    |
| Os01g0898600 | -1.497413055 | 0.021439069 | Os10g0479200 | 1.81650588  | 0.001159671 |
| Os08g0357300 | -1.495648348 | 3.64E-54    | Os01g0795000 | 1.81475188  | 0.001798463 |
| Os01g0303000 | -1.495544237 | 5.41E-17    | Os03g0339900 | 1.814259702 | 1.22E-52    |
| Os11g0151500 | -1.494840013 | 0.001180439 | Os07g0211101 | 1.813266508 | 0.013915416 |
| Os05g0111800 | -1.494835048 | 0.000291674 | Os10g0147250 | 1.81195461  | 9.13E-13    |
| Os06g0715200 | -1.493977178 | 1.13E-10    | Os05g0250000 | 1.811753662 | 9.94E-08    |
| Os03g0743800 | -1.49326374  | 0.003820243 | Os04g0643550 | 1.807968995 | 2.92E-37    |
| Os06g0132300 | -1.489165708 | 6.52E-07    | Os03g0582000 | 1.807386181 | 1.94E-180   |
| Os03g0176900 | -1.48904567  | 0.000200328 | Os02g0194600 | 1.805153856 | 3.89E-12    |
| Os03g0680400 | -1.488903699 | 2.18E-09    | Os09g0407950 | 1.804569202 | 4.90E-35    |
| Os08g0197950 | -1.48707124  | 0.000374011 | Os12g0576100 | 1.802460354 | 0.015108759 |
| Os07g0510400 | -1.486706628 | 0.000215716 | Os12g0509300 | 1.801639649 | 0.000825217 |
| Os09g0432231 | -1.486336696 | 0.04585912  | Os11g0490100 | 1.799918595 | 9.95E-17    |
| Os05g0119350 | -1.48600812  | 0.001436928 | Os03g0586400 | 1.798373472 | 3.98E-66    |
| Os08g0518000 | -1.485823935 | 3.03E-12    | Os06g0231100 | 1.797778042 | 0.000469128 |
| Os05g0545400 | -1.484470682 | 1.90E-21    | Os01g0272850 | 1.797510853 | 9.05E-06    |
| Os02g0125500 | -1.484169392 | 1.31E-05    | Os03g0222500 | 1.797014454 | 0.040388564 |
| Os12g0586100 | -1.480975971 | 4.20E-226   | Os02g0491300 | 1.795546946 | 3.81E-30    |
| Os07g0561300 | -1.479974217 | 5.08E-134   | Os04g0620800 | 1.794651462 | 0.000558863 |
| Os04g0218400 | -1.478766107 | 7.04E-19    | Os05g0163250 | 1.794062023 | 5.39E-09    |
| Os03g0119100 | -1.477990732 | 1.39E-18    | Os08g0295100 | 1.792897726 | 9.67E-88    |
| Os01g0733200 | -1.476955476 | 3.57E-29    | Os08g0119300 | 1.790751706 | 0.049829544 |
| Os10g0510000 | -1.476049573 | 2.56E-61    | Os09g0464033 | 1.789515928 | 5.70E-06    |
| Os02g0807900 | -1.475731381 | 0.009561986 | Os06g0523300 | 1.78907104  | 9.39E-08    |
| Os11g0141800 | -1.474918076 | 6.67E-222   | Os04g0170166 | 1.787778792 | 3.13E-10    |
| Os03g0269601 | -1.474537909 | 0.008655026 | Os01g0148000 | 1.787630302 | 2.04E-09    |
| Os09g0345600 | -1.467876482 | 0.033356026 | Os01g0128200 | 1.786750778 | 9.39E-09    |
| Os10g0488850 | -1.467156633 | 0.005330456 | Os10g0413700 | 1.786489448 | 6.12E-09    |
| Os07g0452100 | -1.467106517 | 0.000295393 | Os01g0798100 | 1.786043518 | 5.32E-132   |
| Os10g0542400 | -1.466232155 | 0.032046539 | Os03g0622700 | 1.785590691 | 7.27E-08    |
| Os11g0229333 | -1.466166394 | 0.00148452  | Os03g0760300 | 1.785222113 | 1.63E-05    |
| Os01g0894700 | -1.466150714 | 3.10E-20    | Os08g0223700 | 1.78491179  | 2.58E-17    |
| Os08g0396500 | -1.464973723 | 0.002090129 | Os11g0433101 | 1.784887797 | 6.15E-14    |
| Os06g0696500 | -1.463224995 | 2.93E-17    | Os02g0628900 | 1.784323648 | 5.27E-09    |
| Os11g0475000 | -1.461276121 | 3.79E-05    | Os01g0964800 | 1.784284007 | 5.90E-34    |
| Os12g0283100 | -1.460822033 | 1.05E-09    | Os11g0272900 | 1.782962803 | 0.026548082 |
| Os04g0527000 | -1.460637418 | 1.17E-07    | Os11g0700500 | 1.78294419  | 0.028595505 |
| Os09g0480900 | -1.458298954 | 0.043362075 | Os05g0326625 | 1.782870412 | 0.009763532 |
| Os10g0482900 | -1.45751479  | 0.000292202 | Os11g0239900 | 1.782091478 | 0.002045085 |

|              |              |             |              |             |                       |
|--------------|--------------|-------------|--------------|-------------|-----------------------|
| Os01g0558700 | -1.456648381 | 0.033263667 | Os11g0305300 | 1.780599667 | 3.40E-18              |
| Os01g0743200 | -1.455780877 | 5.93E-23    | Os03g0305400 | 1.779027294 | 3.77E-37              |
| Os06g0708000 | -1.455139417 | 4.42E-202   | Os03g0648400 | 1.778363774 | 5.48E-154             |
| Os12g0193000 | -1.454449868 | 0.00328255  | Os02g0122900 | 1.778291144 | 6.30E-26              |
| Os07g0256200 | -1.454263451 | 1.96E-47    | Os03g0857301 | 1.777635668 | 0.035519856           |
| Os03g0245800 | -1.454011074 | 0.000929409 | Os12g0171500 | 1.77757442  | 5.61E-09              |
| Os06g0679600 | -1.453538048 | 8.76E-09    | Os05g0590100 | 1.7769636   | 0.039228617           |
| Os06g0162700 | -1.45331009  | 2.72E-06    | Os06g0165300 | 1.776669517 | 0.022560345           |
| Os01g0130200 | -1.453178249 | 1.24E-05    | Os03g0845300 | 1.775452172 | 1.17E-09              |
| Os02g0607700 | -1.453046694 | 2.61E-14    | Os02g0621100 | 1.775445665 | 2.82E-16              |
| Os03g0575200 | -1.452566829 | 0.029139175 | Os02g0202300 | 1.773836409 | 6.31E-07              |
| Os12g0246700 | -1.45250735  | 8.82E-09    | Os06g0158100 | 1.772595018 | 0.047189193           |
| Os04g0107200 | -1.452479533 | 2.50E-14    | Os03g0101400 | 1.771534435 | 0.012578985           |
| Os02g0519700 | -1.451792185 | 0.031483953 | Os06g0301300 | 1.769546844 | 1.69E-19              |
| Os01g0221400 | -1.450226749 | 6.60E-05    | Os04g0690600 | 1.769010275 | 5.06E-05              |
| Os05g0121750 | -1.4498354   | 3.59E-05    | Os03g0370200 | 1.768024169 | 9.53E-16              |
| Os06g0551500 | -1.448913513 | 2.08E-05    | Os04g0435000 | 1.766251585 | 0.027754025           |
| Os12g0178000 | -1.448541481 | 0.00743866  | Os03g0802600 | 1.765913535 | 0.000184419           |
| Os01g0912700 | -1.44807997  | 4.09E-12    | Os08g0565900 | 1.765686751 | 0.033810586           |
| Os06g0592400 | -1.446931438 | 0.028602912 | Os02g0492600 | 1.762228518 | 0.000309871           |
| Os01g0588400 | -1.446824902 | 0.000231228 | Os03g0844700 | 1.761112961 | 5.68E-42              |
| Os02g0678300 | -1.446237163 | 0.03223792  | Os12g0116900 | 1.760385788 | 1.37E-09              |
| Os11g0269000 | -1.445636889 | 2.10E-10    | Os01g0197450 | 1.760021618 | 4.36E-10              |
| Os03g0726700 | -1.442908066 | 4.02E-08    | Os01g0318700 | 1.759782661 | 0.000804769           |
| Os12g0153433 | -1.441834967 | 7.05E-45    | Os07g0158800 | 1.759159154 | 4.20E-25              |
| Os03g0759700 | -1.441284411 | 8.85E-35    | Os02g0572600 | 1.75896471  | 4.84E-26              |
| Os01g0105900 | -1.440708144 | 1.64E-104   | Os03g0116800 | 1.758950574 | 6.41E-14              |
| Os01g0801500 | -1.440551907 | 0.046123651 | Os01g0616900 | 1.756624576 | 1.63E-05              |
| Os06g0148500 | -1.440292927 | 0.005307432 | Os04g0518400 | 1.755541905 | 0.045484385           |
| Os03g0214200 | -1.439406956 | 3.52E-217   | Os05g0181300 | 1.755407613 | 0.002355474           |
| Os05g0421450 | -1.437894042 | 1.81E-05    | Os03g0373500 | 1.755284671 | 9.12E-15              |
| Os06g0251700 | -1.437320625 | 0.001428338 | Os10g0572500 | 1.754101001 | 1.06E-19              |
| Os04g0229100 | -1.437220241 | 4.63E-19    | Os03g0294650 | 1.753559355 | 8.99E-09              |
| Os04g0533250 | -1.435589618 | 1.21E-06    | Os10g0522400 | 1.753246458 | 1.95E-68              |
| Os04g0448700 | -1.434886898 | 1.46E-09    | Os04g0450150 | 1.752956368 | 0.028202693           |
| Os04g0422700 | -1.434382626 | 5.16E-30    | Os05g0537400 | 1.752761329 | 2.39E-43              |
| Os04g0276200 | -1.433181551 | 0.000311245 | Os06g0700700 | 1.752461188 | 1.27E-25              |
| Os03g0259500 | -1.433150265 | 0.000378609 | Os04g0534600 | 1.74931465  | 0.039346973           |
| Os03g0823000 | -1.432164384 | 2.70E-16    | Os12g0621000 | 1.74862562  | 0.017173794           |
| Os04g0612700 | -1.431418335 | 1.57E-34    | Os08g0411000 | 1.747567237 | 3.09E-10              |
| Os02g0186900 | -1.430564513 | 0.002292189 | Os02g0124866 | 1.746334791 | 1.71E-34              |
| Os02g0293300 | -1.429907832 | 3.98E-22    | Os01g0663300 | 1.746284647 | 5.28597372567569e-315 |
| Os03g0171700 | -1.429897714 | 1.57E-25    | Os01g0755500 | 1.745371611 | 5.08E-25              |
| Os08g0293200 | -1.429475456 | 1.54E-10    | Os01g0607600 | 1.742243788 | 0.000522124           |
| Os02g0581100 | -1.428618217 | 2.09E-23    | Os06g0505202 | 1.742128858 | 2.15E-07              |
| Os07g0252800 | -1.427894908 | 1.80E-29    | Os09g0419100 | 1.741741404 | 8.76E-63              |
| Os06g0109500 | -1.427076507 | 0.000449457 | Os03g0144100 | 1.74019643  | 1.14E-27              |
| Os06g0234300 | -1.426848154 | 0.008977197 | Os05g0283000 | 1.739676181 | 1.43E-05              |
| Os08g0197300 | -1.425661929 | 3.14E-19    | Os12g0106801 | 1.738732113 | 6.68E-05              |
| Os12g0580900 | -1.424405757 | 2.09E-56    | Os03g0291500 | 1.738697995 | 1.70E-144             |
| Os06g0469800 | -1.423634645 | 0.011841405 | Os06g0470350 | 1.737873719 | 3.55E-34              |
| Os06g0729400 | -1.42268888  | 1.48E-34    | Os01g0605700 | 1.736631509 | 0.025246674           |
| Os01g0738100 | -1.421417474 | 1.66E-24    | Os10g0481000 | 1.736447264 | 1.12E-28              |
| Os10g0450000 | -1.420708283 | 7.28E-08    | Os01g0795050 | 1.736443864 | 0.001914312           |
| Os01g0717601 | -1.420665369 | 0.024674893 | Os05g0597000 | 1.735956078 | 0.002061844           |
| Os10g0427100 | -1.419188004 | 6.51E-07    | Os01g0111700 | 1.731944548 | 0.047951543           |
| Os03g0393100 | -1.418360762 | 0.049545938 | Os12g0407900 | 1.731928468 | 8.37E-22              |
| Os01g0899700 | -1.417921351 | 1.44E-07    | Os06g0605750 | 1.731551053 | 0.00015758            |
| Os03g0139500 | -1.417911728 | 9.52E-12    | Os08g0335200 | 1.731223968 | 0.017384942           |
| Os10g0340100 | -1.416995456 | 0.000975801 | Os08g0162200 | 1.731213355 | 3.78E-14              |
| Os01g0727200 | -1.416739072 | 0.002593119 | Os11g0657700 | 1.730056381 | 0.020967774           |
| Os07g0694700 | -1.416646789 | 1.10E-179   | Os11g0220100 | 1.729275313 | 0.00206271            |
| Os01g0587300 | -1.415376416 | 0.000712089 | Os02g0123300 | 1.727664457 | 2.13E-08              |
| Os08g0241900 | -1.412842282 | 5.26E-05    | Os09g0426800 | 1.727006296 | 3.51E-05              |
| Os11g0631450 | -1.412466773 | 0.00236184  | Os10g0114300 | 1.726854269 | 4.87E-06              |
| Os06g0569500 | -1.410200191 | 8.28E-07    | Os05g0454500 | 1.726464661 | 8.55E-17              |
| Os03g0411900 | -1.410045062 | 6.80E-05    | Os11g0434800 | 1.725947483 | 4.23E-37              |
| Os03g0236200 | -1.408981774 | 1.25E-12    | Os08g0116700 | 1.725414553 | 1.01E-05              |
| Os04g0404900 | -1.408810015 | 6.60E-12    | Os06g0337200 | 1.724919156 | 0.03548538            |
| Os05g0143800 | -1.408236531 | 0.00045832  | Os05g0420750 | 1.723899014 | 7.20E-131             |
| Os06g0159900 | -1.405964606 | 1.19E-42    | Os07g0625500 | 1.723047816 | 1.85E-08              |

|              |              |             |              |             |             |
|--------------|--------------|-------------|--------------|-------------|-------------|
| Os01g0753150 | -1.404957012 | 0.000100427 | Os09g0325366 | 1.719938369 | 0.039691988 |
| Os06g0627500 | -1.401094052 | 6.89E-07    | Os07g0517433 | 1.719303222 | 0.003958668 |
| Os07g0523100 | -1.400513783 | 0.000669265 | Os11g0425100 | 1.719249489 | 8.07E-09    |
| Os07g0119000 | -1.399523677 | 0.008032204 | Os07g0648266 | 1.719020453 | 8.79E-27    |
| Os02g0774100 | -1.399133961 | 9.06E-27    | Os08g0399300 | 1.718279941 | 1.33E-56    |
| Os02g0543300 | -1.398397959 | 0.000935282 | Os01g0914600 | 1.717999493 | 1.23E-08    |
| Os01g0880300 | -1.396289481 | 5.57E-34    | Os02g0618400 | 1.717050903 | 0.002214762 |
| Os04g0433300 | -1.395694065 | 2.90E-07    | Os02g0617075 | 1.714474247 | 8.99E-10    |
| Os05g0417000 | -1.395257074 | 5.07E-11    | Os03g0178100 | 1.7133753   | 4.05E-14    |
| Os01g0332150 | -1.394458938 | 0.034345676 | Os02g0631601 | 1.71324566  | 2.08E-13    |
| Os07g0253000 | -1.394249351 | 0.000438802 | Os09g0547900 | 1.712718029 | 1.64E-32    |
| Os07g0663200 | -1.393312125 | 0.021358294 | Os10g0492000 | 1.711651353 | 2.61E-88    |
| Os02g0773500 | -1.39172597  | 6.28E-05    | Os04g0475200 | 1.711578246 | 0.002571568 |
| Os03g0848200 | -1.388784102 | 2.96E-05    | Os12g0511400 | 1.70994665  | 4.11E-09    |
| Os03g0107100 | -1.388422978 | 0.001526881 | Os01g0773400 | 1.709677655 | 0.025347537 |
| Os08g0373900 | -1.388182219 | 0.042637583 | Os12g0428000 | 1.709492782 | 0.008576986 |
| Os01g0595800 | -1.388137774 | 8.01E-06    | Os08g0400200 | 1.707266322 | 1.63E-52    |
| Os08g0425100 | -1.388050039 | 2.18E-05    | Os06g0118075 | 1.706970674 | 0.012997658 |
| Os07g0272700 | -1.38778453  | 0.005214004 | Os02g0630300 | 1.706867311 | 1.14E-11    |
| Os10g0326800 | -1.386155239 | 0.048675055 | Os01g0634300 | 1.704822419 | 3.63E-183   |
| Os02g0634700 | -1.385841131 | 9.60E-25    | Os03g0275450 | 1.700199074 | 3.54E-16    |
| Os01g0532100 | -1.384021635 | 1.71E-27    | Os02g0152800 | 1.699359209 | 6.54E-12    |
| Os01g0106400 | -1.383591583 | 0.013565937 | Os08g0255500 | 1.699298401 | 0.006219122 |
| Os11g0168600 | -1.382380298 | 0.00421878  | Os01g0290800 | 1.698529565 | 5.68E-58    |
| Os02g0287900 | -1.381069988 | 1.30E-08    | Os05g0343800 | 1.697621623 | 8.08E-15    |
| Os06g0219900 | -1.380062329 | 0.036728054 | Os01g0884700 | 1.697151663 | 0.000153861 |
| Os10g0124700 | -1.379157355 | 2.51E-09    | Os12g0539700 | 1.697133006 | 5.43E-51    |
| Os02g0790600 | -1.378489999 | 5.08E-11    | Os01g0854000 | 1.696330748 | 2.09E-33    |
| Os12g0109850 | -1.378290647 | 0.031716013 | Os06g0536800 | 1.69626318  | 2.93E-35    |
| Os01g0629500 | -1.378266449 | 0.001840435 | Os03g0393100 | 1.695561598 | 0.021474881 |
| Os04g0401200 | -1.377624066 | 0.001020071 | Os11g0312340 | 1.695510633 | 1.13E-12    |
| Os06g0116900 | -1.376707586 | 0.004478152 | Os07g0439000 | 1.694300035 | 1.01E-26    |
| Os01g0757500 | -1.376445621 | 7.39E-52    | Os04g0117200 | 1.694267136 | 0.000306774 |
| Os07g0216600 | -1.376362984 | 0.000134458 | Os11g0258500 | 1.691682927 | 0.025570545 |
| Os04g0471700 | -1.37623611  | 1.62E-45    | Os09g0563901 | 1.691457987 | 0.026838196 |
| Os01g0587400 | -1.375703549 | 0.002789353 | Os03g0187550 | 1.691369766 | 0.004524906 |
| Os11g0426400 | -1.375688984 | 0.016721061 | Os04g0678400 | 1.689716557 | 2.68E-67    |
| Os01g0104400 | -1.374773049 | 1.32E-63    | Os08g0445700 | 1.689232701 | 1.04E-46    |
| Os07g0627100 | -1.372666675 | 0.038314186 | Os02g0213450 | 1.688895465 | 2.51E-28    |
| Os01g0243700 | -1.372174197 | 7.38E-65    | Os06g0147000 | 1.688624831 | 1.89E-13    |
| Os01g0841400 | -1.372053148 | 0.000111974 | Os08g0511000 | 1.688623149 | 5.84E-10    |
| Os06g0278000 | -1.371957052 | 7.19E-05    | Os03g0840500 | 1.688451492 | 6.42E-21    |
| Os09g0440700 | -1.371535472 | 3.40E-39    | Os12g0155200 | 1.684922471 | 2.68E-05    |
| Os03g0299600 | -1.370968484 | 1.84E-134   | Os05g0137300 | 1.684580065 | 3.34E-182   |
| Os04g0566700 | -1.370637672 | 0.012657583 | Os10g0432200 | 1.684155482 | 3.11E-09    |
| Os01g0267800 | -1.370086544 | 0.000219604 | Os10g0558600 | 1.68400758  | 3.47E-26    |
| Os04g0280700 | -1.369640759 | 0.000785989 | Os03g0790500 | 1.681673324 | 4.28E-07    |
| Os09g0334600 | -1.369094003 | 2.73E-28    | Os06g0142200 | 1.681411588 | 9.07E-140   |
| Os03g0243700 | -1.368894766 | 1.27E-43    | Os07g0588100 | 1.681389633 | 3.59E-17    |
| Os03g0159600 | -1.368189661 | 2.42E-49    | Os10g0339290 | 1.681260353 | 3.08E-14    |
| Os07g0580900 | -1.367111362 | 1.76E-65    | Os12g0289800 | 1.681178918 | 2.83E-47    |
| Os11g0114900 | -1.366371942 | 6.03E-104   | Os01g0880200 | 1.679810667 | 5.46E-21    |
| Os04g0669700 | -1.366216784 | 2.50E-06    | Os02g0511900 | 1.679413874 | 3.25E-08    |
| Os03g0701100 | -1.365317876 | 8.91E-43    | Os03g0691400 | 1.67940534  | 1.93E-07    |
| Os04g0461000 | -1.364614965 | 4.90E-15    | Os12g0410150 | 1.679243229 | 1.04E-06    |
| Os08g0532300 | -1.364497078 | 8.72E-73    | Os06g0557700 | 1.679194941 | 0.002003325 |
| Os05g0460000 | -1.363281444 | 6.83E-134   | Os10g0126800 | 1.679162417 | 0.000374275 |
| Os01g0730600 | -1.363230502 | 1.47E-07    | Os07g0592100 | 1.679070875 | 4.00E-68    |
| Os07g0633200 | -1.362668989 | 5.68E-43    | Os11g0649300 | 1.678254182 | 7.99E-07    |
| Os11g0633600 | -1.361356849 | 1.08E-05    | Os11g0599000 | 1.677381896 | 2.54E-05    |
| Os05g0584950 | -1.360987192 | 4.65E-07    | Os03g0247300 | 1.675807617 | 2.12E-46    |
| Os10g0155100 | -1.360973589 | 0.000456087 | Os10g0363500 | 1.675145977 | 3.00E-14    |
| Os01g0620800 | -1.360957214 | 1.62E-05    | Os12g0256800 | 1.674893095 | 2.89E-27    |
| Os04g0445000 | -1.360627689 | 1.98E-10    | Os05g0463500 | 1.674493471 | 2.53E-22    |
| Os08g0531000 | -1.360495268 | 1.06E-21    | Os01g0806000 | 1.673896431 | 8.55E-11    |
| Os10g0126800 | -1.360478933 | 5.27E-05    | Os07g0583500 | 1.673657264 | 1.06E-15    |
| Os10g0407400 | -1.360343676 | 9.37E-10    | Os07g0163900 | 1.67335347  | 2.05E-17    |
| Os10g0533150 | -1.360325041 | 6.21E-14    | Os06g0349800 | 1.67290067  | 1.42E-05    |
| Os02g0103300 | -1.359073264 | 0.01630611  | Os05g0179950 | 1.671697451 | 2.12E-15    |
| Os05g0548200 | -1.359041367 | 6.15E-10    | Os02g0671100 | 1.671148319 | 5.20E-09    |
| Os01g0565900 | -1.358863353 | 1.77E-31    | Os09g0380000 | 1.670888178 | 3.42E-46    |



|              |              |             |              |             |             |
|--------------|--------------|-------------|--------------|-------------|-------------|
| Os01g0910800 | -1.358837465 | 2.72E-06    | Os04g0405700 | 1.670083689 | 4.18E-09    |
| Os06g0196200 | -1.358512783 | 1.64E-05    | Os01g0296166 | 1.669902451 | 2.09E-09    |
| Os05g0128600 | -1.357509757 | 0.011456569 | Os10g0524300 | 1.66976334  | 4.01E-06    |
| Os05g0116100 | -1.355594676 | 9.45E-138   | Os10g0572000 | 1.669006849 | 1.31E-05    |
| Os06g0289200 | -1.355588148 | 0.017934697 | Os01g0372350 | 1.668849887 | 2.17E-22    |
| Os03g0803500 | -1.353326919 | 2.19E-24    | Os02g0192001 | 1.668346468 | 0.001373897 |
| Os07g0165100 | -1.353105601 | 3.60E-30    | Os06g0128400 | 1.667712218 | 9.30E-07    |
| Os02g0436500 | -1.352382582 | 3.28E-10    | Os06g0678651 | 1.667693616 | 3.31E-29    |
| Os01g0715500 | -1.351333557 | 8.27E-61    | Os11g0208300 | 1.667113863 | 0.001718309 |
| Os05g0137700 | -1.350558248 | 1.24E-11    | Os12g0543751 | 1.665713443 | 0.012451173 |
| Os11g0268300 | -1.349534722 | 1.13E-13    | Os02g0162733 | 1.665700865 | 4.75E-48    |
| Os02g0676400 | -1.349523742 | 1.21E-09    | Os03g0633100 | 1.665355599 | 2.61E-11    |
| Os07g0206400 | -1.348721543 | 3.73E-07    | Os05g0100750 | 1.665215027 | 6.05E-15    |
| Os02g0803300 | -1.348499055 | 0.038187207 | Os03g0183000 | 1.664305726 | 2.72E-06    |
| Os05g0577500 | -1.348212951 | 0.000466148 | Os07g0671500 | 1.663370384 | 5.20E-50    |
| Os07g0112400 | -1.347995934 | 0.000382189 | Os03g0418700 | 1.663042993 | 2.57E-27    |
| Os02g0216000 | -1.347973475 | 0.014796009 | Os09g0325800 | 1.662756662 | 0.002350018 |
| Os03g0267500 | -1.347343184 | 2.50E-07    | Os07g0448100 | 1.662405149 | 3.44E-154   |
| Os04g0488300 | -1.346610543 | 2.88E-19    | Os01g0657801 | 1.661594503 | 0.000422558 |
| Os01g0281600 | -1.345486301 | 0.000264876 | Os11g0128300 | 1.660907559 | 2.31E-08    |
| Os01g0370600 | -1.345406902 | 0.046273395 | Os04g0218400 | 1.660815799 | 4.73E-14    |
| Os01g0183400 | -1.345070886 | 0.000505131 | Os04g0629600 | 1.659564752 | 1.43E-95    |
| Os02g0761600 | -1.342921579 | 3.59E-70    | Os11g0533000 | 1.659445689 | 1.22E-07    |
| Os05g0565500 | -1.342228312 | 3.78E-33    | Os05g0414600 | 1.657010908 | 1.70E-98    |
| Os11g0161900 | -1.341679739 | 0.001813363 | Os01g0816100 | 1.656013557 | 2.66E-18    |
| Os02g0709600 | -1.341623161 | 3.19E-05    | Os03g0392250 | 1.656009267 | 1.43E-29    |
| Os10g0111800 | -1.340633001 | 5.02E-31    | Os10g0413900 | 1.654937533 | 3.80E-05    |
| Os06g0478600 | -1.340588818 | 8.79E-127   | Os01g0552050 | 1.65110534  | 5.58E-10    |
| Os03g0415500 | -1.340145332 | 3.34E-09    | Os01g0186900 | 1.648322956 | 0.046199721 |
| Os03g0610400 | -1.339724681 | 6.13E-06    | Os01g0863100 | 1.648221576 | 7.81E-06    |
| Os02g0117200 | -1.338726942 | 3.66E-60    | Os03g0300600 | 1.647920946 | 6.78E-159   |
| Os04g0218701 | -1.338381645 | 8.00E-11    | Os01g0223900 | 1.647185104 | 3.66E-10    |
| Os03g0226800 | -1.337748483 | 1.28E-35    | Os08g0374000 | 1.646494955 | 0.015516551 |
| Os02g0732600 | -1.337115691 | 1.70E-08    | Os04g0172100 | 1.645412362 | 1.46E-14    |
| Os03g0147001 | -1.33680388  | 4.43E-05    | Os01g0221100 | 1.643918175 | 2.97E-11    |
| Os02g0314925 | -1.335595702 | 3.87E-06    | Os01g0622033 | 1.643873242 | 1.34E-103   |
| Os01g0742400 | -1.335297068 | 1.41E-11    | Os05g0207200 | 1.643845205 | 7.13E-08    |
| Os07g0241800 | -1.334303055 | 5.99E-08    | Os06g0579600 | 1.643293621 | 2.59E-21    |
| Os03g0321100 | -1.334225142 | 0.001358107 | Os05g0465800 | 1.642861194 | 7.08E-76    |
| Os03g0588600 | -1.33413619  | 1.80E-15    | Os08g0146001 | 1.642783693 | 5.66E-20    |
| Os02g0492900 | -1.334026534 | 1.48E-55    | Os01g0528000 | 1.642507774 | 2.82E-08    |
| Os01g0232200 | -1.334016927 | 5.43E-08    | Os03g0265001 | 1.642011826 | 0.000109128 |
| Os03g0767700 | -1.333863201 | 3.10E-14    | Os06g0606900 | 1.641362372 | 7.03E-28    |
| Os07g0635900 | -1.333825007 | 2.26E-132   | Os04g0466000 | 1.639833833 | 0.003468993 |
| Os01g0832100 | -1.332753501 | 1.07E-11    | Os11g0618850 | 1.639553106 | 1.57E-11    |
| Os12g0545400 | -1.332653364 | 1.42E-08    | Os11g0489250 | 1.636088149 | 1.96E-15    |
| Os09g0478600 | -1.331670971 | 1.38E-68    | Os06g0222100 | 1.633642408 | 1.83E-23    |
| Os01g0651400 | -1.33166091  | 0.01421132  | Os03g0820500 | 1.632688746 | 1.18E-05    |
| Os08g0263400 | -1.327811059 | 0.002313674 | Os05g0583075 | 1.632614696 | 3.09E-23    |
| Os08g0487900 | -1.327753467 | 5.67E-08    | Os01g0811001 | 1.631790266 | 2.18E-08    |
| Os04g0685200 | -1.327543638 | 5.93E-35    | Os03g0145900 | 1.630260684 | 2.41E-33    |
| Os04g0564700 | -1.325422411 | 9.76E-116   | Os01g0591000 | 1.630249705 | 8.11E-17    |
| Os02g0256200 | -1.324787938 | 0.007932572 | Os06g0255200 | 1.630114287 | 8.00E-05    |
| Os12g0143750 | -1.324635681 | 5.61E-07    | Os01g0892500 | 1.629812278 | 0.046683955 |
| Os06g0103200 | -1.324358772 | 0.040381987 | Os01g0679500 | 1.629207931 | 4.55E-19    |
| Os01g0252600 | -1.323533465 | 0.013126816 | Os01g0518651 | 1.629123597 | 0.000747407 |
| Os06g0597000 | -1.321185632 | 4.74E-07    | Os07g0119300 | 1.628659284 | 1.79E-90    |
| Os01g0917700 | -1.320876621 | 1.83E-07    | Os03g0218300 | 1.628321966 | 1.52E-14    |
| Os09g0481400 | -1.320770509 | 2.81E-15    | Os03g0407050 | 1.627696967 | 4.66E-18    |
| Os03g0328300 | -1.320565439 | 6.03E-13    | Os02g0663900 | 1.625928453 | 2.53E-15    |
| Os07g0272800 | -1.319007235 | 8.39E-16    | Os03g0197850 | 1.625721435 | 0.01258478  |
| Os05g0560200 | -1.318765001 | 3.64E-28    | Os03g0371800 | 1.624520302 | 2.84E-06    |
| Os02g0258800 | -1.317619555 | 0.00022378  | Os05g0299250 | 1.624185369 | 0.001368502 |
| Os03g0244466 | -1.31698076  | 0.008764897 | Os02g0695900 | 1.623766893 | 0.02517283  |
| Os07g0554400 | -1.316012932 | 1.26E-07    | Os05g0196400 | 1.623188805 | 1.47E-168   |
| Os11g0454000 | -1.31548363  | 0.014492194 | Os04g0174900 | 1.621082402 | 4.56E-06    |
| Os05g0324000 | -1.313889131 | 3.56E-05    | Os03g0391300 | 1.620938781 | 0.043640171 |
| Os03g0271300 | -1.312990531 | 5.47E-06    | Os10g0396666 | 1.620067739 | 5.95E-17    |
| Os11g0638700 | -1.312093666 | 0.022038607 | Os08g0393700 | 1.619294659 | 7.63E-06    |
| Os01g0782200 | -1.311697972 | 7.76E-13    | Os01g0228500 | 1.618474797 | 2.35E-15    |
| Os03g0439000 | -1.31124014  | 1.07E-12    | Os02g0293500 | 1.61729239  | 2.91E-12    |

|              |              |             |              |             |             |
|--------------|--------------|-------------|--------------|-------------|-------------|
| Os03g0586500 | -1.310738864 | 1.59E-28    | Os12g0596501 | 1.616443525 | 1.58E-12    |
| Os06g0653200 | -1.309929881 | 7.29E-13    | Os12g0568750 | 1.616076039 | 1.10E-06    |
| Os10g0523000 | -1.30919009  | 0.001713407 | Os03g0115300 | 1.615778834 | 1.05E-11    |
| Os02g0834700 | -1.308586857 | 9.05E-19    | Os04g0149400 | 1.614439592 | 0.00765193  |
| Os05g0126800 | -1.306566892 | 4.99E-06    | Os09g0506450 | 1.613807116 | 8.95E-06    |
| Os02g0684000 | -1.30636365  | 4.95E-11    | Os01g0645900 | 1.613804729 | 0.000721604 |
| Os03g0673700 | -1.306346928 | 0.000602033 | Os09g0563200 | 1.613773793 | 2.50E-19    |
| Os03g0679700 | -1.305998149 | 3.19E-111   | Os05g0126800 | 1.613527692 | 3.53E-08    |
| Os05g0314700 | -1.30546884  | 0.00230924  | Os11g0557400 | 1.61284908  | 0.000586922 |
| Os10g0479001 | -1.305350481 | 2.57E-16    | Os07g0121000 | 1.612793045 | 0.016278502 |
| Os08g0130500 | -1.304999955 | 0.014917134 | Os03g0816950 | 1.61242516  | 9.03E-58    |
| Os03g0120800 | -1.304737854 | 0.000809204 | Os02g0156400 | 1.61190518  | 2.06E-20    |
| Os03g0248200 | -1.302747023 | 0.037461482 | Os01g0287700 | 1.611859799 | 5.79E-30    |
| Os10g0566400 | -1.302449061 | 3.49E-23    | Os02g0724000 | 1.611480199 | 1.83E-123   |
| Os02g0311150 | -1.301786169 | 0.006047703 | Os08g0422800 | 1.611308332 | 1.09E-22    |
| Os11g0590700 | -1.30158955  | 0.02703095  | Os06g0731600 | 1.610250182 | 4.62E-60    |
| Os01g0178200 | -1.301100302 | 8.13E-32    | Os04g0675101 | 1.609855602 | 3.71E-07    |
| Os06g0711000 | -1.300589664 | 6.11E-27    | Os07g0490450 | 1.60807578  | 6.76E-07    |
| Os04g0348600 | -1.299936833 | 0.005711064 | Os01g0232500 | 1.606666406 | 8.96E-67    |
| Os01g0944100 | -1.299198219 | 1.28E-05    | Os06g0237400 | 1.605698468 | 0.011506309 |
| Os03g0599600 | -1.298917834 | 1.10E-31    | Os09g0545250 | 1.604182739 | 0.038423524 |
| Os07g0282300 | -1.298455753 | 2.72E-07    | Os05g0119350 | 1.604071853 | 0.001624841 |
| Os03g0300400 | -1.297298998 | 2.60E-05    | Os11g0485900 | 1.604007857 | 6.61E-15    |
| Os02g0752200 | -1.295977081 | 7.15E-09    | Os07g0527750 | 1.603631428 | 0.002835352 |
| Os09g0418500 | -1.295475378 | 5.15E-06    | Os08g0546400 | 1.603469411 | 2.36E-55    |
| Os12g0544600 | -1.295125184 | 4.63E-08    | Os03g0622500 | 1.603173722 | 5.62E-23    |
| Os08g0427700 | -1.291765215 | 6.74E-125   | Os10g0204300 | 1.602830017 | 1.02E-134   |
| Os02g0158100 | -1.291750821 | 0.000114153 | Os10g0456800 | 1.602747287 | 4.62E-25    |
| Os02g0598500 | -1.291109299 | 9.01E-12    | Os05g0373900 | 1.60178474  | 7.02E-13    |
| Os02g0521500 | -1.289547551 | 0.00259285  | Os09g0514200 | 1.601432972 | 7.27E-06    |
| Os02g0567100 | -1.288404144 | 7.76E-12    | Os02g0616800 | 1.60123772  | 1.34E-11    |
| Os01g0130900 | -1.288400273 | 2.92E-83    | Os03g0192800 | 1.600941489 | 4.94E-15    |
| Os02g0119600 | -1.287491955 | 0.000297465 | Os08g0191400 | 1.599576528 | 0.00056719  |
| Os01g0794900 | -1.286170686 | 0.000629142 | Os05g0128100 | 1.599252985 | 5.52E-12    |
| Os03g0705800 | -1.286150342 | 1.38E-34    | Os12g0582700 | 1.598664691 | 2.05E-15    |
| Os01g0234300 | -1.286071955 | 0.000229196 | Os08g0121400 | 1.597613312 | 0.011694714 |
| Os02g0505500 | -1.285248284 | 1.19E-22    | Os05g0387750 | 1.596884355 | 0.032390662 |
| Os02g0457600 | -1.284734742 | 0.012196911 | Os03g0765400 | 1.596562116 | 2.13E-68    |
| Os03g0822000 | -1.284492253 | 9.45E-80    | Os04g0591100 | 1.595551107 | 6.26E-154   |
| Os06g0602400 | -1.284455168 | 3.04E-62    | Os01g0783400 | 1.594699064 | 0.00042598  |
| Os01g0175100 | -1.283929361 | 1.09E-42    | Os12g0147200 | 1.59361475  | 2.47E-11    |
| Os11g0534100 | -1.283830827 | 2.39E-16    | Os08g0411900 | 1.593200789 | 0.004314859 |
| Os04g0316800 | -1.283485155 | 4.94E-09    | Os03g0187525 | 1.592560931 | 1.06E-32    |
| Os01g0596100 | -1.283364901 | 0.001017009 | Os05g0245700 | 1.591009732 | 5.77E-09    |
| Os12g0181200 | -1.282884186 | 4.73E-15    | Os01g0133100 | 1.590865238 | 1.53E-24    |
| Os04g0610400 | -1.282410387 | 2.11E-41    | Os03g0122000 | 1.590321745 | 1.41E-29    |
| Os08g0493800 | -1.281885061 | 0.002273043 | Os09g0486500 | 1.590239786 | 2.55E-57    |
| Os08g0500800 | -1.281469137 | 1.44E-21    | Os08g0552800 | 1.589106252 | 0.030720006 |
| Os03g0758050 | -1.280975551 | 0.004001163 | Os06g0142000 | 1.587294183 | 3.01E-15    |
| Os02g0101900 | -1.279811828 | 0.017373437 | Os03g0324200 | 1.587046147 | 2.69E-18    |
| Os08g0466950 | -1.278434215 | 2.67E-07    | Os10g0554900 | 1.58642414  | 0.014298823 |
| Os05g0468100 | -1.278183972 | 5.32E-15    | Os02g0590800 | 1.586279962 | 0.026543981 |
| Os03g0831000 | -1.277262098 | 4.48E-06    | Os05g0542200 | 1.585844839 | 1.89E-89    |
| Os05g0421900 | -1.276319167 | 9.29E-05    | Os04g0337201 | 1.585359674 | 5.09E-43    |
| Os04g0317800 | -1.275944631 | 2.69E-05    | Os06g0193200 | 1.583919238 | 5.94E-31    |
| Os03g0114100 | -1.27545827  | 1.56E-05    | Os10g0425700 | 1.583859892 | 1.34E-09    |
| Os09g0491820 | -1.275196516 | 6.74E-15    | Os05g0488500 | 1.583197512 | 2.69E-15    |
| Os09g0292300 | -1.273625116 | 0.005903024 | Os04g0591300 | 1.582559598 | 2.54E-18    |
| Os06g0253600 | -1.272918499 | 8.09E-20    | Os08g0223766 | 1.582470132 | 1.69E-17    |
| Os04g0150300 | -1.272669843 | 0.030492404 | Os01g0210700 | 1.582171407 | 0.042080928 |
| Os03g0237500 | -1.272566041 | 1.81E-06    | Os10g0103700 | 1.582127151 | 8.02E-08    |
| Os12g0156000 | -1.272019593 | 8.31E-11    | Os12g0293100 | 1.581795196 | 1.05E-14    |
| Os01g0653500 | -1.27030168  | 0.000377961 | Os05g0303700 | 1.580865757 | 0.001423743 |
| Os01g0951500 | -1.268659797 | 8.94E-06    | Os05g0557900 | 1.579981767 | 5.40E-19    |
| Os07g0151200 | -1.268039509 | 1.33E-08    | Os11g0212300 | 1.579616944 | 1.68E-09    |
| Os08g0241600 | -1.266602611 | 5.56E-194   | Os02g0150000 | 1.578352541 | 0.03271817  |
| Os01g0882500 | -1.266562674 | 0.003171074 | Os05g0105401 | 1.57770217  | 0.017564    |
| Os02g0761500 | -1.265669107 | 1.49E-10    | Os01g0821600 | 1.57763174  | 9.69E-06    |
| Os04g0649600 | -1.265504991 | 0.007943502 | Os08g0322500 | 1.574418285 | 0.014298668 |
| Os01g0681100 | -1.262159291 | 3.12E-05    | Os02g0664150 | 1.573617625 | 1.22E-20    |
| Os05g0490400 | -1.260982017 | 1.61E-10    | Os06g0689600 | 1.573198385 | 2.23E-07    |

|              |              |             |              |             |             |
|--------------|--------------|-------------|--------------|-------------|-------------|
| Os02g0581200 | -1.260789781 | 4.55E-09    | Os04g0182600 | 1.572486597 | 1.36E-18    |
| Os07g0658600 | -1.26019258  | 1.44E-73    | Os04g0182650 | 1.572277492 | 2.53E-60    |
| Os11g0151800 | -1.258420816 | 0.006559716 | Os03g0715600 | 1.570670369 | 0.000106362 |
| Os05g0349400 | -1.258377609 | 3.96E-06    | Os05g0459200 | 1.569468683 | 0.000339044 |
| Os01g0652100 | -1.258352655 | 4.52E-10    | Os04g0603400 | 1.569310205 | 1.37E-25    |
| Os05g0478000 | -1.257733179 | 0.004559226 | Os02g0539600 | 1.568763953 | 1.16E-214   |
| Os07g0277200 | -1.257567014 | 1.30E-18    | Os08g0398800 | 1.567572346 | 5.04E-12    |
| Os09g0260000 | -1.256938819 | 3.91E-10    | Os08g0206700 | 1.567146965 | 3.59E-10    |
| Os02g0636600 | -1.256781763 | 4.37E-05    | Os02g0170000 | 1.565852928 | 1.52E-28    |
| Os09g0521800 | -1.256722363 | 0.010810953 | Os12g0185900 | 1.564815376 | 1.31E-07    |
| Os09g0508200 | -1.256048755 | 2.04E-19    | Os05g0151000 | 1.563742062 | 1.37E-10    |
| Os04g0407900 | -1.255671903 | 1.93E-05    | Os01g0726700 | 1.563421553 | 8.21E-131   |
| Os01g0593200 | -1.254917838 | 4.82E-91    | Os04g0568850 | 1.561886076 | 1.64E-08    |
| Os02g0711300 | -1.253397746 | 0.024726377 | Os08g0529100 | 1.56107927  | 1.10E-07    |
| Os03g0400600 | -1.252748936 | 4.28E-43    | Os01g0773000 | 1.56063732  | 2.45E-14    |
| Os01g0881000 | -1.252698997 | 0.010036635 | Os02g0332800 | 1.560355243 | 8.52E-67    |
| Os01g0599550 | -1.252560391 | 5.41E-06    | Os03g0779500 | 1.559662552 | 1.45E-06    |
| Os04g0616800 | -1.252544742 | 0.000303237 | Os12g0576600 | 1.557073451 | 8.30E-61    |
| Os03g0638900 | -1.25093551  | 0.016148684 | Os03g0261950 | 1.556882551 | 0.000182227 |
| Os02g0714801 | -1.250246662 | 1.35E-07    | Os01g0966200 | 1.55664289  | 5.05E-05    |
| Os03g0254400 | -1.249703608 | 4.12E-48    | Os07g0656500 | 1.555965147 | 3.67E-19    |
| Os11g0514800 | -1.248803235 | 7.37E-24    | Os12g0592400 | 1.555793922 | 0.000608874 |
| Os01g0751400 | -1.248684625 | 0.023702566 | Os05g0275100 | 1.555576686 | 3.88E-24    |
| Os01g0183500 | -1.245327731 | 1.16E-08    | Os08g0502600 | 1.555351312 | 0.000547751 |
| Os12g0434400 | -1.244788637 | 1.24E-10    | Os05g0417000 | 1.555045179 | 1.19E-13    |
| Os05g0453100 | -1.244224886 | 1.00E-05    | Os01g0112500 | 1.554608299 | 1.98E-71    |
| Os01g0212700 | -1.24217411  | 3.50E-06    | Os04g0269900 | 1.554234417 | 3.55E-49    |
| Os09g0321200 | -1.240580603 | 1.05E-12    | Os10g0409400 | 1.553508018 | 0.021682502 |
| Os11g0154900 | -1.240469181 | 0.000194974 | Os01g0115300 | 1.550466637 | 2.24E-05    |
| Os04g0640300 | -1.239947449 | 6.51E-17    | Os02g0278700 | 1.550147824 | 0.046070014 |
| Os07g0182000 | -1.239903559 | 1.77E-06    | Os06g0691600 | 1.548840209 | 0.03039147  |
| Os06g0200350 | -1.239432374 | 3.92E-05    | Os04g0610600 | 1.548359055 | 0.001378726 |
| Os02g0192700 | -1.238745096 | 8.51E-15    | Os07g0679400 | 1.54711294  | 1.27E-05    |
| Os03g0695400 | -1.237988298 | 0.000720125 | Os04g0519912 | 1.546701081 | 1.61E-06    |
| Os08g0390600 | -1.237662491 | 4.18E-11    | Os06g0694400 | 1.546629734 | 3.93E-20    |
| Os03g0171300 | -1.237659265 | 0.00269237  | Os10g0125600 | 1.54645482  | 0.015218399 |
| Os12g0635700 | -1.23686424  | 6.45E-07    | Os05g0570350 | 1.545978135 | 7.35E-06    |
| Os07g0573000 | -1.236823177 | 0.003426663 | Os09g0529350 | 1.545410627 | 9.05E-14    |
| Os01g0358100 | -1.235851825 | 0.000502279 | Os01g0260000 | 1.543803533 | 6.82E-09    |
| Os04g0366000 | -1.235122921 | 1.85E-14    | Os03g0104800 | 1.543728627 | 3.08E-06    |
| Os05g0163600 | -1.23501657  | 0.001133441 | Os09g0413300 | 1.542687426 | 1.64E-23    |
| Os08g0332100 | -1.233916109 | 0.000249973 | Os02g0531600 | 1.542529043 | 0.00235377  |
| Os11g0631825 | -1.231774368 | 0.033823637 | Os04g0674000 | 1.542481977 | 2.71E-33    |
| Os07g0527800 | -1.230625695 | 0.037402421 | Os01g0614700 | 1.541877377 | 1.53E-05    |
| Os05g0441400 | -1.230450649 | 6.45E-46    | Os02g0588300 | 1.541608028 | 1.82E-06    |
| Os08g0490600 | -1.230143669 | 4.18E-29    | Os07g0537600 | 1.54119636  | 1.21E-06    |
| Os12g0198000 | -1.228567483 | 5.84E-16    | Os02g0767050 | 1.540392312 | 2.84E-06    |
| Os03g0118200 | -1.227585454 | 0.002479807 | Os02g0186900 | 1.539336111 | 0.002226737 |
| Os01g0643300 | -1.22705572  | 1.30E-24    | Os04g0474500 | 1.539298559 | 4.96E-21    |
| Os04g0419600 | -1.226666328 | 4.83E-42    | Os12g0489100 | 1.538533311 | 4.32E-35    |
| Os09g0400900 | -1.225732024 | 0.023949918 | Os01g0290000 | 1.538418337 | 2.56E-195   |
| Os06g0520600 | -1.224924342 | 0.000108209 | Os01g0245901 | 1.538079859 | 0.04267852  |
| Os06g0642650 | -1.224589565 | 0.00169118  | Os08g0534400 | 1.537234224 | 1.64E-05    |
| Os03g0405500 | -1.223668419 | 4.21E-10    | Os01g0639900 | 1.537196147 | 0.013721365 |
| Os04g0385900 | -1.223589911 | 0.001634012 | Os01g0114200 | 1.536731976 | 3.57E-08    |
| Os05g0159200 | -1.22307772  | 4.76E-09    | Os06g0505700 | 1.536661471 | 1.25E-89    |
| Os03g0656500 | -1.221919001 | 8.76E-26    | Os10g0173000 | 1.536570691 | 0.000807241 |
| Os01g0914100 | -1.221250932 | 0.004098852 | Os05g0462400 | 1.535975113 | 8.47E-38    |
| Os03g0269700 | -1.219773084 | 6.98E-06    | Os05g0409800 | 1.535444987 | 1.02E-08    |
| Os02g0659500 | -1.217814293 | 8.66E-06    | Os06g0568200 | 1.534996393 | 5.60E-14    |
| Os09g0411500 | -1.21762951  | 0.004582627 | Os07g0105600 | 1.534255675 | 2.88E-35    |
| Os08g0549900 | -1.217014003 | 4.04E-07    | Os03g0411300 | 1.534077303 | 1.25E-31    |
| Os12g0209200 | -1.215932822 | 7.25E-05    | Os04g0589800 | 1.533671618 | 1.51E-05    |
| Os05g0552000 | -1.215931443 | 0.015468646 | Os02g0328550 | 1.533075426 | 5.17E-11    |
| Os08g0367850 | -1.215824653 | 1.59E-13    | Os03g0411900 | 1.53065     | 4.34E-05    |
| Os03g0570100 | -1.215809486 | 1.01E-09    | Os03g0125650 | 1.530200365 | 9.58E-10    |
| Os03g0129400 | -1.215621437 | 3.91E-10    | Os05g0109825 | 1.529579874 | 0.003468993 |
| Os03g0326000 | -1.21418008  | 0.000131341 | Os10g0188275 | 1.52773832  | 2.64E-20    |
| Os03g0777000 | -1.214078738 | 0.011133715 | Os01g0197500 | 1.527349754 | 7.04E-10    |
| Os06g0142100 | -1.214072252 | 0.004321375 | Os09g0376000 | 1.526556721 | 3.12E-12    |
| Os05g0170250 | -1.213714298 | 0.018058762 | Os12g0132900 | 1.52518     | 0.02402862  |

|              |              |             |              |             |             |
|--------------|--------------|-------------|--------------|-------------|-------------|
| Os12g0570300 | -1.213503563 | 0.041910449 | Os12g0110300 | 1.524692131 | 1.24E-84    |
| Os01g0206650 | -1.213463435 | 0.01236593  | Os01g0947800 | 1.524665956 | 0.000115534 |
| Os03g0269900 | -1.213365013 | 5.26E-36    | Os05g0143500 | 1.52242259  | 1.07E-22    |
| Os01g0959900 | -1.213192989 | 1.37E-08    | Os06g0574450 | 1.522387514 | 1.04E-10    |
| Os01g0181166 | -1.212725478 | 2.56E-05    | Os08g0177600 | 1.521956884 | 0.000288995 |
| Os08g0438100 | -1.211970896 | 0.000641896 | Os11g0555300 | 1.521900195 | 9.55E-13    |
| Os07g0625800 | -1.210239204 | 1.09E-18    | Os03g0168550 | 1.521599777 | 0.004119669 |
| Os05g0563300 | -1.209639228 | 0.028186054 | Os01g0718500 | 1.521026983 | 0.021222922 |
| Os08g0135500 | -1.209450751 | 5.93E-06    | Os02g0700300 | 1.52069567  | 0.008692713 |
| Os02g0607500 | -1.208965171 | 0.001366631 | Os03g0107400 | 1.520298748 | 1.57E-38    |
| Os07g0545400 | -1.208393328 | 3.32E-73    | Os01g0833150 | 1.519705933 | 3.45E-06    |
| Os01g0948600 | -1.207492583 | 5.26E-87    | Os03g0374500 | 1.51925667  | 1.19E-11    |
| Os03g0326100 | -1.207256076 | 0.008692829 | Os10g0559700 | 1.518885097 | 2.97E-33    |
| Os08g0411250 | -1.206474292 | 4.71E-10    | Os07g0147800 | 1.518646563 | 1.10E-14    |
| Os12g0543800 | -1.206221307 | 1.35E-08    | Os10g0560500 | 1.518069484 | 1.09E-11    |
| Os08g0498600 | -1.206158985 | 0.002454879 | Os06g0137166 | 1.518038446 | 2.82E-24    |
| Os04g0536500 | -1.20561486  | 7.09E-09    | Os02g0137450 | 1.516619239 | 2.95E-06    |
| Os03g0445700 | -1.205401315 | 1.21E-51    | Os11g0514100 | 1.51640482  | 2.87E-58    |
| Os05g0429500 | -1.205021605 | 1.02E-07    | Os05g0121600 | 1.515515662 | 8.26E-39    |
| Os02g0115900 | -1.204672574 | 3.40E-118   | Os04g0326000 | 1.515505245 | 0.002210005 |
| Os09g0553900 | -1.204443938 | 0.027716647 | Os09g0441625 | 1.512865404 | 0.017073085 |
| Os03g0744200 | -1.204280251 | 2.07E-05    | Os12g0606600 | 1.512733965 | 3.25E-29    |
| Os08g0156000 | -1.204008841 | 0.018512488 | Os05g0386000 | 1.510469411 | 1.30E-15    |
| Os01g0654100 | -1.203839501 | 1.24E-181   | Os10g0132700 | 1.509819365 | 3.53E-22    |
| Os10g0154700 | -1.203291968 | 0.001908654 | Os08g0409100 | 1.509418225 | 5.68E-35    |
| Os01g0838350 | -1.200831408 | 1.25E-12    | Os07g0225000 | 1.509369454 | 0.001161006 |
| Os04g0110200 | -1.200380392 | 0.004338115 | Os10g0422075 | 1.508775915 | 2.61E-18    |
| Os10g0419300 | -1.199731324 | 2.21E-77    | Os05g0565400 | 1.507841777 | 2.31E-18    |
| Os09g0462200 | -1.197726308 | 5.80E-08    | Os12g0632800 | 1.507536978 | 0.000875178 |
| Os01g0502700 | -1.196936434 | 3.88E-50    | Os06g0668250 | 1.507324294 | 0.047739375 |
| Os01g0286200 | -1.196285833 | 0.005417998 | Os08g0408500 | 1.507099026 | 3.46E-102   |
| Os10g0419200 | -1.195905433 | 0.001340184 | Os09g0134900 | 1.505771891 | 1.90E-26    |
| Os04g0684800 | -1.195077277 | 5.81E-32    | Os07g0120700 | 1.505426757 | 1.11E-21    |
| Os01g0939300 | -1.1940167   | 6.94E-11    | Os02g0136933 | 1.504561412 | 0.000644407 |
| Os12g0265600 | -1.193978689 | 0.000186165 | Os02g0211800 | 1.50445507  | 2.29E-08    |
| Os07g0549900 | -1.193560154 | 1.65E-49    | Os11g0235300 | 1.504367435 | 1.99E-07    |
| Os02g0640300 | -1.19311     | 3.14E-30    | Os01g0197350 | 1.503010209 | 4.89E-07    |
| Os04g0531750 | -1.193085727 | 0.002477727 | Os03g0393375 | 1.502650136 | 0.000228481 |
| Os06g0341300 | -1.190495491 | 6.30E-06    | Os05g0324300 | 1.502546971 | 0.035115119 |
| Os02g0543800 | -1.189560853 | 8.90E-05    | Os08g0395700 | 1.501776774 | 6.51E-06    |
| Os11g0479000 | -1.189051869 | 0.000584948 | Os08g0199100 | 1.501327769 | 4.25E-36    |
| Os03g0852400 | -1.188323338 | 4.51E-11    | Os07g0689950 | 1.500253112 | 1.89E-31    |
| Os03g0635100 | -1.187539765 | 1.12E-06    | Os02g0504200 | 1.499604965 | 3.28E-09    |
| Os01g0860800 | -1.187200001 | 2.02E-19    | Os05g0239100 | 1.499254658 | 0.036482271 |
| Os03g0618300 | -1.18718741  | 1.53E-10    | Os08g0384500 | 1.498995362 | 9.08E-08    |
| Os02g0554900 | -1.18704152  | 5.19E-09    | Os08g0452100 | 1.498787744 | 3.97E-52    |
| Os04g0527400 | -1.186366669 | 1.09E-86    | Os02g0156200 | 1.498696923 | 7.69E-13    |
| Os06g0301100 | -1.186209969 | 1.79E-69    | Os11g0226201 | 1.498512099 | 5.52E-06    |
| Os01g0580500 | -1.186102801 | 3.74E-15    | Os09g0279300 | 1.498442789 | 4.43E-07    |
| Os05g0151300 | -1.185283524 | 3.73E-36    | Os09g0421200 | 1.496416288 | 4.16E-41    |
| Os08g0397800 | -1.184998218 | 1.62E-38    | Os07g0154900 | 1.496350814 | 3.51E-05    |
| Os11g0672400 | -1.184994107 | 7.83E-08    | Os01g0819000 | 1.496219959 | 1.84E-68    |
| Os10g0580500 | -1.184254161 | 0.001784328 | Os05g0440300 | 1.495940231 | 0.002024308 |
| Os11g0544000 | -1.183265954 | 2.22E-07    | Os04g0644750 | 1.495889142 | 3.02E-36    |
| Os02g0599200 | -1.183208458 | 0.000349197 | Os09g0521300 | 1.495693362 | 6.94E-07    |
| Os08g0548700 | -1.183160095 | 6.58E-21    | Os05g0398450 | 1.495679442 | 7.97E-33    |
| Os04g0410400 | -1.183113471 | 7.10E-05    | Os01g0880350 | 1.493954963 | 0.033675759 |
| Os07g0246200 | -1.182906042 | 1.02E-135   | Os03g0165025 | 1.493303398 | 1.25E-05    |
| Os12g0595600 | -1.182398997 | 2.91E-19    | Os06g0243900 | 1.492156942 | 0.021521083 |
| Os01g0872000 | -1.181817264 | 0.006944914 | Os01g0131450 | 1.491887463 | 1.02E-13    |
| Os02g0189400 | -1.181693872 | 0.003629793 | Os05g0455200 | 1.491696941 | 0.002463768 |
| Os05g0153901 | -1.180942793 | 0.038582418 | Os03g0578900 | 1.491669141 | 0.000505391 |
| Os10g0556100 | -1.179340295 | 3.51E-121   | Os06g0645800 | 1.491382907 | 2.71E-113   |
| Os09g0363200 | -1.17929879  | 7.05E-05    | Os02g0179950 | 1.487599089 | 2.57E-39    |
| Os01g0946600 | -1.17902135  | 0.016652234 | Os07g0549200 | 1.487348889 | 0.00020916  |
| Os01g0756200 | -1.178906092 | 7.29E-15    | Os01g0388000 | 1.48721737  | 3.75E-47    |
| Os10g0539500 | -1.17865603  | 1.95E-69    | Os01g0742100 | 1.486540521 | 5.36E-07    |
| Os12g0543701 | -1.178340662 | 3.44E-06    | Os07g0621100 | 1.486426475 | 1.59E-17    |
| Os04g0405700 | -1.178222454 | 1.10E-08    | Os08g0266400 | 1.48576423  | 3.69E-05    |
| Os04g0649500 | -1.177695582 | 5.61E-06    | Os05g0290400 | 1.485313552 | 8.25E-41    |
| Os04g0649400 | -1.176581017 | 7.22E-13    | Os01g0113000 | 1.482751945 | 2.65E-07    |

|              |              |             |              |             |             |
|--------------|--------------|-------------|--------------|-------------|-------------|
| Os09g0107400 | -1.176492294 | 0.006522135 | Os02g0153200 | 1.482643906 | 4.09E-31    |
| Os07g0115600 | -1.175820387 | 0.000450567 | Os02g0575000 | 1.482491392 | 0.047919225 |
| Os02g0799600 | -1.175706351 | 0.000645416 | Os01g0580500 | 1.482397568 | 5.05E-16    |
| Os05g0486100 | -1.175068417 | 1.17E-10    | Os07g0204000 | 1.482117656 | 7.52E-07    |
| Os12g0573000 | -1.174703298 | 1.80E-19    | Os03g0158500 | 1.481929018 | 1.53E-91    |
| Os06g0571800 | -1.17468615  | 2.01E-15    | Os07g0177100 | 1.481890839 | 1.19E-36    |
| Os01g0817700 | -1.17457776  | 4.57E-115   | Os01g0868300 | 1.481889173 | 6.46E-08    |
| Os08g0198800 | -1.17398494  | 0.000425752 | Os03g0176900 | 1.481700109 | 0.00035568  |
| Os11g0576975 | -1.173250235 | 3.76E-11    | Os09g0372900 | 1.481380887 | 8.44E-78    |
| Os02g0707000 | -1.172817286 | 0.00067972  | Os04g0295200 | 1.480881722 | 3.14E-07    |
| Os06g0481900 | -1.172670385 | 2.02E-05    | Os03g0625700 | 1.479683445 | 1.47E-13    |
| Os06g0519400 | -1.172461531 | 6.11E-11    | Os03g0317100 | 1.477447416 | 1.68E-15    |
| Os09g0415300 | -1.170826732 | 1.80E-17    | Os11g0474900 | 1.476889953 | 0.03003478  |
| Os07g0543500 | -1.170791797 | 0.004298685 | Os12g0122400 | 1.476103256 | 0.0001343   |
| Os10g0578800 | -1.170741471 | 1.11E-09    | Os08g0465700 | 1.475996581 | 0.01254781  |
| Os01g0623900 | -1.170105872 | 3.42E-36    | Os05g0122500 | 1.475278031 | 6.97E-22    |
| Os01g0725000 | -1.169490477 | 3.17E-10    | Os01g0122534 | 1.473954974 | 0.000898459 |
| Os09g0436900 | -1.169312388 | 0.000657764 | Os09g0347550 | 1.473809786 | 5.75E-28    |
| Os01g0339500 | -1.16781307  | 0.000157252 | Os10g0357800 | 1.473695404 | 2.00E-26    |
| Os07g0606800 | -1.167023623 | 3.18E-06    | Os02g0153900 | 1.473298401 | 6.34E-07    |
| Os02g0632700 | -1.165443585 | 0.002005865 | Os12g0594000 | 1.472881514 | 3.59E-09    |
| Os01g0702500 | -1.165393537 | 3.74E-06    | Os07g0685700 | 1.47279054  | 2.32E-176   |
| Os03g0234900 | -1.165347785 | 2.69E-68    | Os03g0322000 | 1.471486861 | 0.00013798  |
| Os01g0728100 | -1.165243686 | 4.82E-18    | Os04g0661200 | 1.471049918 | 7.79E-25    |
| Os04g0306750 | -1.164740127 | 4.44E-18    | Os01g0717000 | 1.470020472 | 1.76E-82    |
| Os07g0538700 | -1.16433048  | 0.012194511 | Os10g0568200 | 1.468490519 | 6.25E-13    |
| Os12g0624300 | -1.163143836 | 0.000121174 | Os04g0291900 | 1.468284288 | 0.029796316 |
| Os01g0298301 | -1.163022346 | 2.49E-07    | Os01g0882500 | 1.468145043 | 0.000628965 |
| Os07g0561500 | -1.161711008 | 2.03E-12    | Os05g0502200 | 1.467179303 | 3.53E-92    |
| Os04g0497200 | -1.161498893 | 0.001014339 | Os12g0509200 | 1.466529935 | 0.02051728  |
| Os05g0520300 | -1.160063993 | 1.14E-17    | Os07g0192550 | 1.466056968 | 0.013801168 |
| Os08g0360300 | -1.159759216 | 0.015308492 | Os01g0152500 | 1.465060734 | 0.039144457 |
| Os04g0635100 | -1.159142855 | 1.66E-11    | Os01g0681600 | 1.462644899 | 3.96E-74    |
| Os04g0359100 | -1.159100955 | 2.42E-07    | Os02g0567850 | 1.462331783 | 7.59E-14    |
| Os05g0571300 | -1.158990872 | 6.80E-17    | Os06g0718300 | 1.462075738 | 3.92E-05    |
| Os08g0226400 | -1.158856925 | 0.001416568 | Os06g0720900 | 1.461906483 | 0.031337526 |
| Os04g0479900 | -1.158228768 | 4.30E-28    | Os01g0149350 | 1.458841098 | 4.21E-10    |
| Os02g0187300 | -1.158008803 | 2.97E-06    | Os02g0218550 | 1.458364531 | 0.001117741 |
| Os05g0356700 | -1.157122481 | 4.44E-07    | Os07g0165200 | 1.456214813 | 2.76E-34    |
| Os01g0215000 | -1.15693545  | 1.09E-06    | Os05g0535600 | 1.456175662 | 2.86E-19    |
| Os09g0547100 | -1.156782601 | 4.65E-09    | Os04g0686500 | 1.456150605 | 0.000259486 |
| Os09g0414900 | -1.156624049 | 0.002976588 | Os11g0276100 | 1.455897306 | 3.58E-05    |
| Os04g0463000 | -1.155523539 | 2.60E-35    | Os01g0799000 | 1.454602644 | 0.028208333 |
| Os10g0330400 | -1.155266149 | 0.03153483  | Os09g0483700 | 1.453757665 | 0.011339471 |
| Os11g0631900 | -1.155086902 | 0.032133165 | Os06g0679700 | 1.449604474 | 2.26E-09    |
| Os05g0111200 | -1.155053853 | 8.71E-48    | Os09g0434100 | 1.447801763 | 1.53E-71    |
| Os12g0592400 | -1.154887365 | 0.006543252 | Os09g0387150 | 1.447490512 | 5.62E-39    |
| Os01g0384450 | -1.154313125 | 2.55E-06    | Os12g0407200 | 1.447003382 | 0.008634142 |
| Os04g0657900 | -1.154179745 | 4.41E-14    | Os10g0167500 | 1.447002347 | 4.46E-24    |
| Os04g0670900 | -1.152561271 | 2.34E-39    | Os06g0611200 | 1.446921479 | 1.32E-12    |
| Os08g0474100 | -1.152512423 | 3.47E-07    | Os01g0566050 | 1.446016146 | 8.29E-43    |
| Os03g0216400 | -1.152369243 | 0.000105505 | Os07g0505200 | 1.445963803 | 4.02E-05    |
| Os03g0258200 | -1.151890606 | 1.35E-17    | Os01g0653500 | 1.445856965 | 0.000693464 |
| Os01g0229600 | -1.151762418 | 2.67E-06    | Os06g0634700 | 1.44571681  | 0.00037378  |
| Os01g0239200 | -1.151524773 | 0.001022249 | Os05g0410900 | 1.442734183 | 0.019373072 |
| Os04g0181901 | -1.151362945 | 0.017928939 | Os06g0535100 | 1.441374226 | 0.001610683 |
| Os11g0474000 | -1.150746118 | 0.009884144 | Os03g0358975 | 1.441073489 | 1.61E-06    |
| Os06g0651100 | -1.150345076 | 1.36E-08    | Os01g0124200 | 1.4394691   | 3.09E-39    |
| Os08g0487700 | -1.149706994 | 5.62E-14    | Os01g0166200 | 1.439047935 | 7.89E-07    |
| Os01g0763700 | -1.149486504 | 9.03E-08    | Os03g0294700 | 1.43863075  | 7.16E-31    |
| Os03g0802600 | -1.149380474 | 0.003986945 | Os04g0685151 | 1.438106693 | 0.003266863 |
| Os05g0489200 | -1.149379571 | 3.26E-20    | Os12g0633700 | 1.43782361  | 9.92E-16    |
| Os05g0571600 | -1.149260455 | 2.55E-17    | Os03g0192600 | 1.437440947 | 0.000117367 |
| Os04g0430200 | -1.149244118 | 9.51E-05    | Os02g0493087 | 1.43724338  | 5.07E-20    |
| Os08g0384100 | -1.149055954 | 7.27E-108   | Os03g0601000 | 1.436727978 | 2.21E-08    |
| Os03g0160300 | -1.148141502 | 0.026463724 | Os02g0132100 | 1.436633605 | 9.76E-28    |
| Os05g0512301 | -1.148084765 | 1.55E-06    | Os08g0298800 | 1.43638813  | 8.60E-08    |
| Os08g0429800 | -1.147426848 | 0.048486764 | Os04g0596300 | 1.436147389 | 4.31E-31    |
| Os12g0543751 | -1.147391733 | 0.045966408 | Os06g0728902 | 1.436075675 | 5.09E-06    |
| Os05g0531700 | -1.147383896 | 1.87E-07    | Os05g0402851 | 1.435883093 | 2.03E-09    |
| Os01g0726700 | -1.146795014 | 1.27E-74    | Os04g0306400 | 1.434870129 | 4.35E-202   |

|              |              |             |              |             |             |
|--------------|--------------|-------------|--------------|-------------|-------------|
| Os01g0346400 | -1.146777928 | 1.55E-21    | Os05g0358500 | 1.434508349 | 1.14E-31    |
| Os03g0238600 | -1.146249943 | 8.59E-28    | Os01g0221400 | 1.433766935 | 6.83E-07    |
| Os08g0548650 | -1.146093249 | 1.82E-25    | Os11g0533100 | 1.433475456 | 3.49E-92    |
| Os05g0353500 | -1.146031302 | 2.30E-14    | Os01g0795400 | 1.433446635 | 1.52E-07    |
| Os01g0763900 | -1.145898069 | 4.03E-45    | Os09g0325140 | 1.432038487 | 5.46E-07    |
| Os02g0111800 | -1.144183612 | 0.015490446 | Os09g0562400 | 1.431807353 | 1.57E-06    |
| Os07g0170200 | -1.144084677 | 6.43E-09    | Os08g0307000 | 1.43144191  | 9.98E-40    |
| Os01g0802200 | -1.143930528 | 7.17E-09    | Os03g0164901 | 1.43127021  | 1.30E-05    |
| Os08g0531600 | -1.143909505 | 1.18E-41    | Os02g0686700 | 1.430580217 | 8.72E-11    |
| Os01g0624400 | -1.143810648 | 0.03955912  | Os01g0245700 | 1.429434893 | 0.029498115 |
| Os01g0755700 | -1.142679384 | 2.22E-17    | Os07g0668000 | 1.42935254  | 4.45E-06    |
| Os07g0613800 | -1.141783077 | 1.80E-05    | Os01g0117100 | 1.428976292 | 3.05E-06    |
| Os02g0579300 | -1.14157212  | 1.16E-24    | Os05g0122400 | 1.427213027 | 2.21E-11    |
| Os04g0418100 | -1.141079902 | 0.000216804 | Os01g0530450 | 1.426858204 | 0.002620125 |
| Os06g0132600 | -1.140216442 | 4.67E-31    | Os04g0583900 | 1.426532096 | 5.01E-44    |
| Os08g0281600 | -1.140212275 | 0.000258519 | Os04g0412350 | 1.425951182 | 3.65E-16    |
| Os11g0534500 | -1.13874897  | 0.005848258 | Os01g0603100 | 1.425386562 | 2.84E-07    |
| Os06g0671000 | -1.137478009 | 0.000985672 | Os03g0847800 | 1.425341384 | 8.29E-08    |
| Os11g0245650 | -1.136681284 | 0.004821671 | Os03g0715400 | 1.424441583 | 1.71E-45    |
| Os05g0583950 | -1.136005409 | 1.20E-05    | Os03g0757500 | 1.423995941 | 0.000742399 |
| Os03g0343900 | -1.135660859 | 1.24E-17    | Os09g0436300 | 1.423878213 | 3.14E-14    |
| Os05g0232700 | -1.135439762 | 3.62E-45    | Os01g0975900 | 1.423433862 | 0.01818287  |
| Os11g0170000 | -1.135242074 | 2.92E-35    | Os03g0566700 | 1.423410964 | 0.016767646 |
| Os04g0272200 | -1.134683682 | 1.14E-32    | Os10g0425900 | 1.42339406  | 0.000187321 |
| Os05g0104700 | -1.13451164  | 0.017521698 | Os01g0126401 | 1.423059995 | 1.12E-08    |
| Os12g0596201 | -1.134389018 | 0.00173749  | Os10g0548100 | 1.423039878 | 7.36E-09    |
| Os02g0661100 | -1.133897529 | 3.39E-14    | Os08g0442000 | 1.423014468 | 7.04E-08    |
| Os04g0507700 | -1.133806333 | 5.21E-140   | Os12g0288801 | 1.422963934 | 1.17E-11    |
| Os11g0526000 | -1.133498231 | 5.14E-07    | Os12g0181600 | 1.422741976 | 0.000918318 |
| Os12g0204550 | -1.132267986 | 0.030793229 | Os03g0792400 | 1.421931064 | 1.04E-78    |
| Os09g0319800 | -1.130931265 | 1.03E-08    | Os05g0509800 | 1.421200107 | 2.52E-07    |
| Os06g0256900 | -1.130793565 | 5.07E-93    | Os06g0725550 | 1.420124523 | 0.030720006 |
| Os10g0160600 | -1.13040241  | 4.17E-29    | Os02g0649300 | 1.419801492 | 5.74E-05    |
| Os07g0457400 | -1.129871368 | 0.000864785 | Os07g0173300 | 1.419293969 | 1.67E-10    |
| Os06g0649000 | -1.12950174  | 0.026447567 | Os02g0754100 | 1.418578018 | 3.72E-193   |
| Os09g0499400 | -1.129316245 | 2.71E-25    | Os08g0190500 | 1.418132378 | 0.025018552 |
| Os08g0378000 | -1.128909262 | 0.004683962 | Os04g0174850 | 1.417798583 | 7.67E-11    |
| Os09g0454300 | -1.127596169 | 6.28E-38    | Os06g0573800 | 1.415531035 | 8.22E-06    |
| Os03g0421100 | -1.127135829 | 0.009643865 | Os01g0559000 | 1.415497845 | 1.82E-218   |
| Os02g0726700 | -1.126870397 | 1.86E-12    | Os04g0465432 | 1.415172274 | 8.24E-10    |
| Os01g0939600 | -1.126172332 | 1.32E-73    | Os12g0493900 | 1.414918538 | 1.62E-08    |
| Os10g0427700 | -1.126100104 | 8.80E-05    | Os06g0574900 | 1.413903798 | 5.96E-12    |
| Os07g0623600 | -1.126079602 | 9.78E-20    | Os09g0364800 | 1.413663087 | 6.94E-16    |
| Os11g0535600 | -1.1260029   | 1.31E-08    | Os05g0157300 | 1.413540967 | 9.52E-60    |
| Os09g0424300 | -1.125805216 | 7.50E-08    | Os07g0599201 | 1.413283584 | 0.037837729 |
| Os04g0443200 | -1.125661502 | 0.034224458 | Os06g0264300 | 1.412481971 | 3.29E-60    |
| Os03g0621400 | -1.125621305 | 6.62E-36    | Os05g0560200 | 1.412228606 | 6.24E-32    |
| Os03g0844600 | -1.124987022 | 1.81E-11    | Os02g0712800 | 1.411887396 | 1.32E-10    |
| Os11g0456000 | -1.124253307 | 9.14E-14    | Os05g0224900 | 1.411858798 | 1.08E-26    |
| Os12g0613600 | -1.124104749 | 1.07E-20    | Os10g0482900 | 1.411171031 | 0.001350018 |
| Os06g0644200 | -1.124090516 | 0.003258247 | Os04g0167875 | 1.410489595 | 1.25E-22    |
| Os07g0130000 | -1.12323427  | 0.008766919 | Os01g0162001 | 1.409808555 | 2.90E-05    |
| Os04g0650416 | -1.123178068 | 0.003384547 | Os01g0392600 | 1.409376791 | 1.87E-13    |
| Os03g0259400 | -1.122780672 | 0.029823422 | Os04g0533200 | 1.408040202 | 0.000321096 |
| Os02g0122100 | -1.121893058 | 2.17E-32    | Os10g0486900 | 1.408021532 | 4.81E-07    |
| Os06g0600301 | -1.121824227 | 1.30E-12    | Os07g0634000 | 1.407906689 | 0.001269983 |
| Os08g0549600 | -1.11960498  | 0.003231384 | Os01g0339500 | 1.406569141 | 1.47E-05    |
| Os07g0530700 | -1.119456346 | 4.89E-06    | Os12g0131150 | 1.406397647 | 2.28E-05    |
| Os05g0122500 | -1.118871551 | 9.83E-14    | Os01g0244000 | 1.404404442 | 3.40E-16    |
| Os09g0499300 | -1.11863235  | 4.28E-25    | Os03g0210400 | 1.403680036 | 2.06E-32    |
| Os03g0769500 | -1.118405063 | 5.54E-05    | Os06g0707350 | 1.403422608 | 0.001059489 |
| Os09g0510000 | -1.118396789 | 3.10E-17    | Os01g0676200 | 1.403363473 | 1.47E-06    |
| Os01g0138100 | -1.118364914 | 0.014949747 | Os09g0433700 | 1.403290715 | 0.010818098 |
| Os05g0212300 | -1.117649918 | 8.29E-08    | Os02g0713900 | 1.403069202 | 7.89E-07    |
| Os03g0386500 | -1.117456243 | 1.06E-53    | Os01g0198900 | 1.401991534 | 4.29E-13    |
| Os04g0408600 | -1.116912081 | 0.00439748  | Os03g0278400 | 1.401695807 | 1.90E-22    |
| Os04g0208500 | -1.116772202 | 8.23E-08    | Os03g0254200 | 1.40117049  | 0.008620351 |
| Os02g0810900 | -1.116406799 | 0.00126912  | Os01g0243800 | 1.401023603 | 7.22E-09    |
| Os03g0582800 | -1.115568501 | 1.54E-22    | Os03g0862000 | 1.400844329 | 5.62E-07    |
| Os06g0301500 | -1.115382642 | 2.13E-52    | Os02g0184300 | 1.400440328 | 1.16E-37    |
| Os10g0402400 | -1.115267363 | 6.69E-05    | Os07g0679000 | 1.399146973 | 5.38E-37    |

|              |              |             |              |             |             |
|--------------|--------------|-------------|--------------|-------------|-------------|
| Os04g0296034 | -1.115133382 | 2.20E-05    | Os12g0433200 | 1.399033239 | 3.58E-08    |
| Os10g0378450 | -1.114969845 | 8.31E-13    | Os01g0784000 | 1.398506061 | 5.32E-19    |
| Os06g0292301 | -1.114917508 | 0.00439347  | Os06g0563250 | 1.397394704 | 6.86E-58    |
| Os05g0560300 | -1.114728713 | 0.038314186 | Os02g0752701 | 1.39460416  | 5.83E-10    |
| Os10g0397900 | -1.114500598 | 0.002725087 | Os11g0207800 | 1.394308478 | 0.004136041 |
| Os05g0207400 | -1.114182461 | 0.001583472 | Os09g0422600 | 1.392561298 | 1.85E-50    |
| Os09g0493400 | -1.114180689 | 0.001689555 | Os03g0675000 | 1.392511898 | 0.006269792 |
| Os06g0624700 | -1.113583205 | 5.47E-09    | Os03g0687800 | 1.392236219 | 0.000551228 |
| Os03g0227601 | -1.113481505 | 0.024610453 | Os11g0493700 | 1.390565003 | 0.00093501  |
| Os02g0163500 | -1.112982094 | 1.39E-48    | Os10g0372800 | 1.390437767 | 8.45E-113   |
| Os07g0681200 | -1.112871438 | 0.006633513 | Os10g0444500 | 1.390297053 | 3.12E-06    |
| Os01g0508000 | -1.112588324 | 5.32E-23    | Os11g0127951 | 1.389721511 | 0.001360348 |
| Os05g0582800 | -1.112356183 | 1.48E-30    | Os12g0225150 | 1.389090748 | 8.41E-63    |
| Os07g0451101 | -1.112150006 | 0.002937527 | Os03g0777600 | 1.388981082 | 1.90E-13    |
| Os05g0154300 | -1.111200693 | 0.001003899 | Os06g0249500 | 1.388161053 | 2.00E-07    |
| Os12g0556100 | -1.11111558  | 0.000153594 | Os09g0380501 | 1.388156608 | 0.022448441 |
| Os07g0297200 | -1.111008644 | 2.92E-09    | Os06g0707700 | 1.387313064 | 2.71E-12    |
| Os10g0475100 | -1.110889741 | 8.86E-08    | Os05g0438500 | 1.387016671 | 0.000132369 |
| Os06g0497500 | -1.108527835 | 1.76E-19    | Os08g0225050 | 1.38380044  | 1.03E-13    |
| Os10g0554001 | -1.108234029 | 2.15E-11    | Os01g0283300 | 1.383323708 | 1.39E-75    |
| Os06g0203600 | -1.108094091 | 7.48E-28    | Os05g0257100 | 1.382327111 | 1.08E-14    |
| Os07g0151100 | -1.107876152 | 3.84E-28    | Os03g0767700 | 1.382189923 | 1.02E-09    |
| Os09g0309500 | -1.107606132 | 7.10E-15    | Os01g0810500 | 1.382098678 | 1.58E-18    |
| Os09g0272000 | -1.107403853 | 8.52E-11    | Os05g0128200 | 1.381575277 | 1.29E-134   |
| Os07g0476900 | -1.106054681 | 1.32E-05    | Os05g0588900 | 1.381510336 | 0.007065332 |
| Os09g0491788 | -1.104808086 | 5.16E-56    | Os12g0102350 | 1.380906655 | 2.86E-11    |
| Os03g0333400 | -1.104288495 | 1.35E-16    | Os12g0129300 | 1.379366252 | 0.005914001 |
| Os02g0264800 | -1.104266773 | 2.47E-117   | Os01g0313300 | 1.378772224 | 0.004668967 |
| Os05g0439300 | -1.103636437 | 2.48E-08    | Os03g0401100 | 1.378364219 | 0.00106716  |
| Os08g0475000 | -1.103602367 | 5.23E-05    | Os01g0843432 | 1.377694843 | 0.00207297  |
| Os04g0475400 | -1.103405105 | 1.39E-06    | Os04g0529400 | 1.37765074  | 1.83E-43    |
| Os02g0784100 | -1.103273082 | 2.70E-47    | Os01g0263600 | 1.37668502  | 6.28E-71    |
| Os01g0759100 | -1.103005449 | 0.000257578 | Os08g0227500 | 1.376553572 | 0.001516444 |
| Os01g0149800 | -1.102599272 | 0.000367535 | Os05g0226300 | 1.376465997 | 8.31E-13    |
| Os01g0194600 | -1.101849155 | 2.85E-05    | Os01g0530300 | 1.375377612 | 8.97E-29    |
| Os11g0535525 | -1.100955638 | 7.93E-07    | Os08g0302000 | 1.37499606  | 3.31E-40    |
| Os03g0731100 | -1.100081753 | 1.55E-05    | Os05g0157600 | 1.37490414  | 0.02295663  |
| Os05g0188700 | -1.099638269 | 6.36E-10    | Os07g0517100 | 1.374516853 | 6.63E-09    |
| Os02g0306401 | -1.098537996 | 0.043084034 | Os02g0616300 | 1.374311159 | 6.33E-23    |
| Os06g0162550 | -1.097582298 | 0.045196727 | Os02g0779650 | 1.374212503 | 0.008692835 |
| Os03g0676100 | -1.097530865 | 2.91E-05    | Os05g0462000 | 1.374136634 | 9.54E-06    |
| Os12g0493900 | -1.097465859 | 7.83E-07    | Os02g0312750 | 1.373669379 | 0.000454983 |
| Os06g0531751 | -1.09716918  | 0.01409217  | Os12g0595500 | 1.373225829 | 3.84E-31    |
| Os03g0278200 | -1.097158657 | 1.94E-16    | Os12g0109000 | 1.373197262 | 0.000127344 |
| Os02g0182850 | -1.097029711 | 9.12E-07    | Os11g0483950 | 1.372320409 | 1.60E-05    |
| Os01g0585400 | -1.096606787 | 0.022152945 | Os09g0391800 | 1.372070528 | 0.010880119 |
| Os03g0119900 | -1.096035806 | 1.04E-44    | Os03g0624300 | 1.371905513 | 0.020350032 |
| Os02g0684900 | -1.095796401 | 1.27E-113   | Os07g0101200 | 1.37168119  | 8.60E-13    |
| Os06g0266800 | -1.095724787 | 4.30E-130   | Os05g0432600 | 1.371078739 | 4.93E-07    |
| Os12g0508400 | -1.0952151   | 1.29E-11    | Os02g0209050 | 1.370626295 | 1.47E-06    |
| Os01g0640000 | -1.094677141 | 0.012967132 | Os07g0109600 | 1.37012494  | 1.14E-35    |
| Os05g0119600 | -1.094616765 | 5.86E-13    | Os07g0203800 | 1.36999005  | 7.05E-08    |
| Os08g0521800 | -1.093489438 | 4.55E-06    | Os09g0564800 | 1.36997313  | 3.32E-08    |
| Os01g0222300 | -1.093309011 | 9.25E-25    | Os08g0224000 | 1.369235426 | 3.26E-21    |
| Os06g0160100 | -1.092731132 | 1.38E-100   | Os07g0618700 | 1.368133136 | 4.32E-98    |
| Os04g0578550 | -1.092366207 | 1.37E-06    | Os03g0773300 | 1.367830095 | 0.000298731 |
| Os01g0731000 | -1.092320073 | 2.52E-30    | Os11g0654800 | 1.366605732 | 8.74E-05    |
| Os09g0260300 | -1.091584098 | 0.005932441 | Os06g0601000 | 1.365498897 | 1.60E-72    |
| Os01g0687300 | -1.091535009 | 3.22E-39    | Os04g0449450 | 1.365341808 | 4.36E-10    |
| Os03g0724500 | -1.091301754 | 1.65E-06    | Os08g0537002 | 1.364983148 | 3.28E-05    |
| Os11g0658700 | -1.091009785 | 0.015267757 | Os07g0198300 | 1.364949481 | 8.89E-18    |
| Os01g0529800 | -1.090866923 | 1.47E-13    | Os11g0590700 | 1.363217951 | 0.004644822 |
| Os12g0417000 | -1.090568639 | 0.026748211 | Os12g0572400 | 1.362517009 | 5.99E-36    |
| Os01g0705700 | -1.088871503 | 0.044168219 | Os02g0592833 | 1.361240543 | 0.01427001  |
| Os07g0684100 | -1.088273564 | 7.84E-93    | Os06g0628032 | 1.361076768 | 0.005684768 |
| Os11g0216000 | -1.088005926 | 3.89E-38    | Os03g0386500 | 1.360794318 | 7.40E-69    |
| Os07g0666400 | -1.087612345 | 9.21E-20    | Os04g0672700 | 1.360791157 | 3.18E-18    |
| Os05g0399200 | -1.087559216 | 1.82E-05    | Os03g0653900 | 1.360338363 | 3.90E-34    |
| Os04g0526000 | -1.087296027 | 8.15E-29    | Os01g0171100 | 1.360095104 | 0.000373648 |
| Os05g0499600 | -1.086710667 | 6.61E-06    | Os04g0309100 | 1.359528021 | 2.26E-13    |
| Os08g0478466 | -1.08529854  | 9.27E-05    | Os04g0599300 | 1.359297421 | 1.92E-08    |

|              |              |             |              |             |             |
|--------------|--------------|-------------|--------------|-------------|-------------|
| Os12g0139400 | -1.084948581 | 4.84E-15    | Os02g0126500 | 1.359261774 | 1.81E-11    |
| Os06g0187050 | -1.084171605 | 7.21E-10    | Os01g0101300 | 1.359205481 | 0.000450646 |
| Os09g0481800 | -1.084042884 | 1.09E-10    | Os09g0309500 | 1.358770292 | 4.77E-19    |
| Os07g0149300 | -1.083534273 | 2.34E-07    | Os08g0429225 | 1.358207907 | 1.65E-05    |
| Os08g0525600 | -1.082257837 | 1.13E-75    | Os02g0581800 | 1.35797843  | 0.026838196 |
| Os04g0529600 | -1.081659702 | 3.36E-05    | Os06g0698785 | 1.357832673 | 3.90E-05    |
| Os05g0406700 | -1.080979347 | 3.66E-13    | Os06g0202900 | 1.356701068 | 0.000195444 |
| Os01g0275500 | -1.080863724 | 0.003666824 | Os05g0574800 | 1.355783073 | 4.70E-19    |
| Os11g0672900 | -1.079842906 | 0.045751553 | Os08g0269000 | 1.355374822 | 1.96E-05    |
| Os01g0702000 | -1.07979736  | 8.24E-42    | Os03g0407100 | 1.355051263 | 0.009967817 |
| Os01g0866200 | -1.079526488 | 1.58E-83    | Os02g0650800 | 1.355025451 | 3.08E-05    |
| Os02g0544566 | -1.079440112 | 2.17E-07    | Os06g0208100 | 1.354700337 | 1.53E-12    |
| Os06g0701900 | -1.078878834 | 0.008711633 | Os04g0677400 | 1.353658623 | 0.000309273 |
| Os01g0756900 | -1.077746544 | 4.17E-10    | Os10g0521100 | 1.353570296 | 3.37E-25    |
| Os11g0146100 | -1.077076482 | 7.81E-08    | Os01g0611300 | 1.352553954 | 0.000178408 |
| Os01g0616800 | -1.076669527 | 2.07E-14    | Os02g0829000 | 1.352090138 | 0.000157005 |
| Os04g0578600 | -1.075779776 | 3.54E-05    | Os09g0512950 | 1.351922988 | 1.11E-10    |
| Os02g0136400 | -1.075146415 | 0.01271409  | Os02g0640300 | 1.35145429  | 2.44E-37    |
| Os09g0316400 | -1.075087794 | 3.71E-10    | Os03g0752000 | 1.351257894 | 0.00242106  |
| Os09g0421800 | -1.074777113 | 1.10E-18    | Os08g0179100 | 1.350421244 | 0.002278032 |
| Os07g0168600 | -1.074457435 | 1.54E-07    | Os02g0297600 | 1.349874053 | 6.46E-31    |
| Os12g0608500 | -1.074118343 | 0.008131331 | Os06g0597000 | 1.349571997 | 3.01E-06    |
| Os09g0562600 | -1.073438278 | 0.003449933 | Os03g0655400 | 1.349430724 | 6.89E-48    |
| Os03g0742900 | -1.072807383 | 5.07E-55    | Os01g0502900 | 1.348782763 | 7.56E-20    |
| Os07g0592000 | -1.07267984  | 6.06E-92    | Os04g0555600 | 1.348747512 | 8.95E-11    |
| Os10g0533200 | -1.072159157 | 8.80E-23    | Os04g0536500 | 1.348569031 | 1.84E-10    |
| Os07g0643100 | -1.071796406 | 0.018449084 | Os02g0456000 | 1.348121325 | 3.92E-18    |
| Os02g0633700 | -1.070690474 | 0.046761546 | Os02g0698000 | 1.348103594 | 0.00771936  |
| Os04g0624701 | -1.070602798 | 5.59E-05    | Os07g0297500 | 1.348085573 | 2.19E-06    |
| Os05g0569900 | -1.070407323 | 2.14E-10    | Os07g0211000 | 1.347952825 | 3.52E-23    |
| Os12g0507700 | -1.070238411 | 5.94E-06    | Os07g0113300 | 1.34723129  | 4.64E-08    |
| Os10g0109300 | -1.070206756 | 7.14E-22    | Os01g0654100 | 1.347072869 | 1.54E-230   |
| Os05g0320700 | -1.069999734 | 0.000226784 | Os08g0307601 | 1.347014082 | 0.000294775 |
| Os07g0559100 | -1.069289231 | 2.93E-12    | Os08g0557600 | 1.346483025 | 3.07E-71    |
| Os06g0544100 | -1.06849483  | 2.95E-67    | Os02g0831000 | 1.344735937 | 1.22E-13    |
| Os05g0353400 | -1.067749352 | 1.96E-05    | Os11g0574400 | 1.344151184 | 0.018820959 |
| Os06g0724700 | -1.066789368 | 8.54E-52    | Os10g0506100 | 1.3440655   | 0.00012863  |
| Os06g0620000 | -1.066523128 | 9.03E-05    | Os02g0807800 | 1.343485795 | 0.001054859 |
| Os05g0466600 | -1.066342804 | 3.49E-69    | Os02g0669100 | 1.343134995 | 3.05E-165   |
| Os03g0140100 | -1.065601131 | 0.000840633 | Os01g0880300 | 1.342777897 | 1.06E-37    |
| Os04g0586000 | -1.06549698  | 3.99E-64    | Os04g0634800 | 1.34250153  | 0.04449545  |
| Os06g0659800 | -1.065460283 | 0.001835045 | Os11g0151800 | 1.341611006 | 0.005765554 |
| Os01g0121300 | -1.06543956  | 2.58E-19    | Os07g0667900 | 1.341577607 | 6.18E-29    |
| Os02g0121400 | -1.065120012 | 8.55E-11    | Os04g0103500 | 1.341441094 | 0.001904563 |
| Os05g0542200 | -1.065084804 | 3.45E-42    | Os01g0841800 | 1.341232465 | 1.05E-19    |
| Os06g0236300 | -1.064943099 | 1.11E-11    | Os04g0169300 | 1.340397664 | 5.58E-42    |
| Os04g0108101 | -1.061960647 | 0.000943515 | Os11g0544000 | 1.340298726 | 1.00E-11    |
| Os10g0555900 | -1.061831792 | 5.04E-15    | Os07g0436600 | 1.340206728 | 4.50E-15    |
| Os01g0154500 | -1.061527207 | 3.09E-05    | Os01g0868000 | 1.33773157  | 0.000321803 |
| Os08g0481100 | -1.061307997 | 0.004821957 | Os07g0209100 | 1.336847016 | 2.46E-07    |
| Os06g0643700 | -1.061263919 | 3.46E-07    | Os06g0701900 | 1.335934259 | 0.003994511 |
| Os01g0802900 | -1.061048794 | 0.015957365 | Os03g0754500 | 1.335806604 | 6.91E-11    |
| Os10g0540800 | -1.060667711 | 1.39E-64    | Os02g0709900 | 1.334904424 | 2.38E-85    |
| Os09g0449500 | -1.06020939  | 3.59E-10    | Os04g0560500 | 1.334826303 | 1.40E-22    |
| Os02g0580500 | -1.059549771 | 2.52E-19    | Os06g0664000 | 1.334544094 | 0.001880458 |
| Os02g0769100 | -1.059508511 | 2.63E-11    | Os12g0152900 | 1.333779346 | 7.35E-20    |
| Os01g0175600 | -1.059219903 | 0.04984988  | Os09g0329200 | 1.333661823 | 0.004392944 |
| Os03g0696150 | -1.059082505 | 1.43E-05    | Os06g0718100 | 1.332735238 | 7.43E-59    |
| Os01g0240600 | -1.058907447 | 0.010119034 | Os03g0275400 | 1.332286253 | 0.040367752 |
| Os01g0274300 | -1.05887627  | 0.023092991 | Os01g0775200 | 1.332213522 | 3.01E-69    |
| Os03g0191400 | -1.058651594 | 0.016750872 | Os01g0872000 | 1.332062024 | 0.000254506 |
| Os06g0218800 | -1.058519987 | 0.006202946 | Os01g0781100 | 1.332037729 | 1.12E-07    |
| Os07g0145250 | -1.058093674 | 2.08E-07    | Os01g0910900 | 1.329871634 | 0.047059388 |
| Os07g0558400 | -1.057084107 | 1.70E-60    | Os01g0660900 | 1.329672695 | 2.53E-09    |
| Os02g0574600 | -1.056925538 | 2.37E-08    | Os04g0488200 | 1.328821788 | 1.05E-11    |
| Os03g0386800 | -1.05510849  | 1.51E-09    | Os01g0621200 | 1.327422597 | 2.47E-09    |
| Os05g0249800 | -1.054705247 | 1.53E-05    | Os05g0549850 | 1.327355446 | 4.90E-11    |
| Os06g0289900 | -1.054699682 | 6.33E-18    | Os04g0648900 | 1.327128484 | 1.10E-35    |
| Os01g0855200 | -1.054348881 | 8.07E-38    | Os04g0121100 | 1.327030363 | 3.67E-05    |
| Os07g0162700 | -1.053920182 | 0.000329523 | Os04g0618050 | 1.326049467 | 2.51E-09    |
| Os02g0762600 | -1.053738388 | 3.55E-45    | Os12g0105975 | 1.32441119  | 0.005142786 |



|              |              |             |              |             |             |
|--------------|--------------|-------------|--------------|-------------|-------------|
| Os11g0180600 | -1.051593001 | 9.25E-69    | Os02g0634700 | 1.322603346 | 9.73E-18    |
| Os12g0224000 | -1.050720474 | 6.83E-52    | Os07g0120400 | 1.322270158 | 1.20E-16    |
| Os07g0613500 | -1.049576042 | 0.000242865 | Os03g0440200 | 1.321894271 | 0.002414102 |
| Os02g0106600 | -1.049571418 | 5.78E-12    | Os03g0108600 | 1.321814029 | 1.25E-62    |
| Os03g0288300 | -1.049509623 | 1.70E-61    | Os02g0695200 | 1.321062201 | 0.001903332 |
| Os08g0171600 | -1.049494868 | 2.76E-09    | Os08g0463900 | 1.320924673 | 1.44E-18    |
| Os03g0792800 | -1.04937449  | 2.99E-24    | Os02g0700500 | 1.320895577 | 1.31E-06    |
| Os11g0145700 | -1.049318846 | 4.67E-05    | Os01g0361800 | 1.320281946 | 2.58E-13    |
| Os02g0530300 | -1.04920483  | 9.44E-07    | Os01g0727500 | 1.320168296 | 0.000166659 |
| Os07g0192700 | -1.049133981 | 2.49E-05    | Os05g0459600 | 1.32005598  | 0.003006349 |
| Os06g0260000 | -1.049088367 | 9.72E-05    | Os03g0584050 | 1.319521817 | 2.20E-27    |
| Os06g0691200 | -1.048892649 | 2.36E-48    | Os05g0595100 | 1.318684221 | 9.44E-11    |
| Os07g0480800 | -1.047729261 | 1.42E-22    | Os03g0795400 | 1.317674587 | 2.91E-14    |
| Os04g0665200 | -1.047660521 | 4.80E-06    | Os10g0158000 | 1.316758524 | 1.10E-09    |
| Os10g0434801 | -1.047484143 | 0.023223602 | Os11g0473275 | 1.316496329 | 1.38E-39    |
| Os06g0702200 | -1.04689132  | 5.17E-07    | Os03g0112101 | 1.316448991 | 5.79E-12    |
| Os11g0598800 | -1.046326356 | 1.29E-28    | Os03g0132900 | 1.316122106 | 0.049885605 |
| Os10g0545100 | -1.045300862 | 0.001196729 | Os01g0879200 | 1.315792715 | 0.010945714 |
| Os01g0746400 | -1.043541324 | 0.002588371 | Os02g0533800 | 1.315321219 | 6.59E-10    |
| Os01g0639900 | -1.04343311  | 0.00213157  | Os03g0141200 | 1.315117341 | 2.98E-41    |
| Os05g0531100 | -1.043406678 | 0.047620278 | Os05g0145700 | 1.31378537  | 4.35E-14    |
| Os07g0537500 | -1.043378061 | 1.14E-07    | Os08g0476050 | 1.313665913 | 3.83E-10    |
| Os10g0556500 | -1.04250289  | 0.039217946 | Os02g0129000 | 1.313520513 | 2.32E-05    |
| Os10g0536700 | -1.042319189 | 0.000115336 | Os12g0194100 | 1.312717948 | 5.99E-16    |
| Os07g0224550 | -1.042308068 | 6.55E-08    | Os02g0126000 | 1.312600355 | 2.27E-41    |
| Os12g0174200 | -1.042099889 | 0.006022946 | Os04g0481050 | 1.311660357 | 0.00020862  |
| Os08g0463100 | -1.04165158  | 0.002502466 | Os01g0621600 | 1.311598162 | 0.048342668 |
| Os10g0473950 | -1.041191017 | 8.09E-11    | Os03g0712500 | 1.311154259 | 1.20E-14    |
| Os04g0673300 | -1.040837095 | 4.64E-27    | Os03g0740800 | 1.310662101 | 6.83E-32    |
| Os05g0319700 | -1.040229024 | 2.60E-08    | Os06g0728300 | 1.310319473 | 7.28E-22    |
| Os12g0270900 | -1.039835046 | 0.000404086 | Os05g0111800 | 1.309665799 | 0.007597037 |
| Os12g0244901 | -1.039412886 | 0.000132773 | Os09g0538800 | 1.309349392 | 5.10E-05    |
| Os06g0178900 | -1.039365606 | 1.90E-70    | Os08g0382800 | 1.309316976 | 7.50E-31    |
| Os10g0566700 | -1.039328215 | 4.95E-18    | Os03g0639200 | 1.307706305 | 4.74E-18    |
| Os10g0338858 | -1.0389258   | 0.035710075 | Os06g0650700 | 1.307567034 | 5.45E-06    |
| Os01g0234700 | -1.038629876 | 6.53E-10    | Os07g0669700 | 1.307412825 | 0.000258219 |
| Os04g0691366 | -1.038178584 | 0.000301364 | Os03g0576400 | 1.307023788 | 5.39E-07    |
| Os04g0413500 | -1.038153612 | 3.42E-43    | Os04g0621500 | 1.305975027 | 8.50E-14    |
| Os03g0826000 | -1.037944161 | 0.002252922 | Os01g0507000 | 1.30582548  | 1.75E-64    |
| Os01g0871600 | -1.037006661 | 0.001943181 | Os05g0195700 | 1.30412792  | 8.51E-09    |
| Os03g0833100 | -1.036430838 | 0.001161569 | Os02g0625100 | 1.303865216 | 0.000236683 |
| Os02g0656100 | -1.035421287 | 1.18E-32    | Os04g0394200 | 1.303141416 | 0.002161488 |
| Os04g0587751 | -1.035334487 | 0.03450371  | Os01g0740650 | 1.303118453 | 8.30E-06    |
| Os12g0482500 | -1.034917913 | 0.01630965  | Os06g0346201 | 1.302555408 | 1.16E-24    |
| Os03g0346500 | -1.034711591 | 1.60E-17    | Os01g0149500 | 1.302544502 | 2.41E-16    |
| Os02g0306100 | -1.034582912 | 1.88E-08    | Os08g0135900 | 1.302160299 | 9.98E-20    |
| Os02g0530500 | -1.034325667 | 1.27E-08    | Os01g0863300 | 1.299686063 | 5.26E-32    |
| Os08g0196700 | -1.034062676 | 9.27E-26    | Os05g0143800 | 1.299352958 | 4.71E-05    |
| Os02g0121300 | -1.032945612 | 1.60E-85    | Os05g0586050 | 1.299332838 | 0.000788141 |
| Os07g0646500 | -1.032378744 | 3.26E-21    | Os02g0160250 | 1.299240942 | 9.18E-07    |
| Os10g0567600 | -1.032371479 | 4.12E-09    | Os07g0523100 | 1.299098449 | 0.007606779 |
| Os06g0298200 | -1.032335542 | 8.13E-69    | Os06g0542100 | 1.298639688 | 1.46E-14    |
| Os08g0419600 | -1.03225505  | 8.15E-32    | Os06g0634100 | 1.298363217 | 1.46E-18    |
| Os03g0799900 | -1.032216959 | 3.00E-15    | Os11g0594600 | 1.29819383  | 7.91E-10    |
| Os03g0432000 | -1.032132354 | 0.032278332 | Os03g0559700 | 1.298016473 | 0.013952007 |
| Os03g0106400 | -1.032049439 | 2.23E-30    | Os02g0807900 | 1.297670986 | 0.040013915 |
| Os02g0580400 | -1.031635322 | 1.25E-59    | Os03g0387800 | 1.297585991 | 2.69E-16    |
| Os09g0451000 | -1.031323401 | 0.008308475 | Os05g0482400 | 1.296315272 | 2.58E-22    |
| Os12g0592832 | -1.031253362 | 0.001869668 | Os02g0577300 | 1.295334899 | 0.000531417 |
| Os12g0571300 | -1.031234343 | 0.002377951 | Os04g0370100 | 1.294939807 | 0.00508592  |
| Os05g0477500 | -1.030950798 | 0.034462355 | Os03g0301550 | 1.294828065 | 6.86E-16    |
| Os07g0298900 | -1.030933949 | 1.87E-05    | Os09g0363400 | 1.294797627 | 1.25E-05    |
| Os09g0553300 | -1.029846713 | 2.12E-69    | Os08g0531000 | 1.293019219 | 7.71E-16    |
| Os10g0466500 | -1.028959231 | 0.00082153  | Os03g0296100 | 1.292904783 | 0.018115054 |
| Os10g0555300 | -1.028445616 | 7.16E-07    | Os07g0561300 | 1.292586707 | 3.70E-71    |
| Os11g0678400 | -1.028252993 | 0.009532244 | Os03g0858800 | 1.292319749 | 0.005716875 |
| Os09g0470500 | -1.028188266 | 1.00E-64    | Os08g0276200 | 1.292279811 | 6.57E-43    |
| Os02g0655800 | -1.027815305 | 1.89E-66    | Os01g0658900 | 1.291672843 | 6.65E-78    |
| Os02g0125600 | -1.027673714 | 6.15E-06    | Os03g0685800 | 1.291544285 | 2.39E-29    |
| Os03g0128700 | -1.026652835 | 6.18E-54    | Os08g0332800 | 1.290843689 | 2.32E-09    |
| Os01g0219000 | -1.026187957 | 5.48E-07    | Os03g0689833 | 1.290669599 | 4.61E-05    |

|              |              |             |              |             |             |
|--------------|--------------|-------------|--------------|-------------|-------------|
| Os03g0127500 | -1.025661544 | 1.72E-19    | Os09g0320201 | 1.290591987 | 1.26E-13    |
| Os02g0635800 | -1.02453486  | 7.03E-37    | Os08g0394000 | 1.290482845 | 8.56E-10    |
| Os07g0438600 | -1.023868958 | 0.036905069 | Os10g0203000 | 1.290450907 | 1.62E-85    |
| Os03g0285800 | -1.023617966 | 3.35E-11    | Os04g0388700 | 1.289085527 | 2.51E-23    |
| Os01g0152000 | -1.02286886  | 0.029101554 | Os10g0563500 | 1.288464555 | 2.35E-41    |
| Os04g0495900 | -1.022142867 | 2.19E-10    | Os07g0228400 | 1.288275177 | 1.47E-12    |
| Os05g0508900 | -1.021716621 | 2.81E-12    | Os01g0873300 | 1.288032009 | 0.002916851 |
| Os07g0124100 | -1.021021627 | 1.05E-06    | Os01g0661500 | 1.287696831 | 1.79E-99    |
| Os01g0167400 | -1.02030974  | 0.002694535 | Os01g0727400 | 1.287457081 | 2.60E-06    |
| Os02g0818900 | -1.019040349 | 0.024514071 | Os07g0680800 | 1.287212523 | 1.65E-05    |
| Os08g0327501 | -1.018896479 | 0.006664563 | Os09g0367900 | 1.286690198 | 1.36E-31    |
| Os03g0636800 | -1.018781304 | 1.81E-44    | Os05g0441500 | 1.286607677 | 7.98E-65    |
| Os02g0166600 | -1.018679722 | 4.18E-05    | Os03g0146200 | 1.285914044 | 1.58E-12    |
| Os04g0363976 | -1.018635024 | 0.006543252 | Os04g0684900 | 1.285313875 | 1.56E-09    |
| Os04g0607583 | -1.01819068  | 0.003919411 | Os01g0781200 | 1.284293023 | 4.73E-29    |
| Os01g0764000 | -1.017830859 | 3.20E-05    | Os06g0500300 | 1.284027002 | 4.18E-06    |
| Os04g0674600 | -1.017682344 | 0.035859262 | Os11g0303200 | 1.283799774 | 1.11E-74    |
| Os09g0526500 | -1.017590448 | 0.00570444  | Os04g0531800 | 1.282884695 | 2.21E-08    |
| Os04g0430700 | -1.017561251 | 0.002463462 | Os08g0474500 | 1.280847262 | 0.000711079 |
| Os07g0480300 | -1.017527794 | 5.21E-06    | Os01g0546700 | 1.279836384 | 1.79E-08    |
| Os10g0100300 | -1.016741938 | 6.50E-07    | Os03g0758551 | 1.2787509   | 9.54E-06    |
| Os02g0726000 | -1.016621904 | 1.30E-22    | Os01g0234300 | 1.278467884 | 0.000147419 |
| Os06g0245900 | -1.016488606 | 1.40E-29    | Os06g0503250 | 1.278114755 | 0.020605828 |
| Os01g0607200 | -1.0161526   | 6.36E-07    | Os01g0616366 | 1.278045552 | 4.39E-26    |
| Os08g0548400 | -1.016093815 | 6.06E-07    | Os03g0861400 | 1.277710612 | 3.50E-10    |
| Os01g0863800 | -1.01599041  | 1.92E-09    | Os10g0469700 | 1.277587251 | 2.34E-06    |
| Os02g0229800 | -1.014739845 | 4.14E-09    | Os08g0548650 | 1.277550927 | 3.17E-30    |
| Os04g0628100 | -1.014607247 | 1.40E-73    | Os06g0638500 | 1.277221525 | 4.54E-47    |
| Os09g0568200 | -1.014369667 | 1.44E-08    | Os01g0266100 | 1.275783084 | 0.00183133  |
| Os03g0576500 | -1.01426235  | 0.023088357 | Os12g0507700 | 1.273933988 | 7.05E-06    |
| Os03g0751100 | -1.013721193 | 6.72E-08    | Os04g0117250 | 1.271977419 | 1.81E-05    |
| Os03g0327100 | -1.013702522 | 1.80E-10    | Os04g0337000 | 1.271148239 | 5.75E-42    |
| Os04g0435200 | -1.013662228 | 0.000123416 | Os09g0246900 | 1.26947441  | 8.08E-08    |
| Os03g0672500 | -1.013462114 | 8.01E-16    | Os03g0566600 | 1.269203279 | 3.67E-10    |
| Os12g0591500 | -1.013403084 | 0.000313091 | Os03g0204900 | 1.26878561  | 5.18E-06    |
| Os02g0743800 | -1.012603545 | 2.27E-28    | Os11g0607100 | 1.268668766 | 1.32E-18    |
| Os01g0656200 | -1.012425418 | 2.86E-43    | Os10g0194400 | 1.268100036 | 0.000761748 |
| Os05g0153400 | -1.012421553 | 4.24E-12    | Os01g0668200 | 1.267565429 | 0.000174747 |
| Os11g0245500 | -1.01215619  | 4.57E-15    | Os04g0640600 | 1.26735955  | 1.24E-05    |
| Os03g0736900 | -1.012013059 | 2.60E-11    | Os02g0211900 | 1.266649159 | 8.95E-06    |
| Os03g0841700 | -1.011898891 | 6.60E-26    | Os06g0527100 | 1.266641428 | 5.02E-15    |
| Os04g0674025 | -1.011298136 | 7.72E-05    | Os05g0305000 | 1.265626923 | 0.02992248  |
| Os06g0686600 | -1.010506587 | 6.49E-28    | Os06g0231050 | 1.265489125 | 1.04E-05    |
| Os01g0132200 | -1.010180958 | 0.003979639 | Os01g0566100 | 1.265284838 | 1.24E-24    |
| Os03g0210500 | -1.010175786 | 2.38E-28    | Os04g0250050 | 1.264638291 | 4.89E-22    |
| Os08g0531700 | -1.010088329 | 2.89E-66    | Os04g0677700 | 1.264480418 | 4.61E-87    |
| Os03g0105000 | -1.009922092 | 1.33E-12    | Os03g0643611 | 1.264191254 | 0.014427403 |
| Os03g0356652 | -1.009912442 | 1.84E-42    | Os01g0946600 | 1.264168378 | 0.015264179 |
| Os01g0543100 | -1.009813081 | 1.13E-69    | Os03g0821900 | 1.263768479 | 3.62E-26    |
| Os05g0124000 | -1.009005331 | 4.17E-73    | Os11g0539200 | 1.26317353  | 1.67E-105   |
| Os10g0401000 | -1.008852465 | 4.10E-16    | Os11g0200600 | 1.262801161 | 5.29E-13    |
| Os03g0290400 | -1.00865377  | 4.54E-06    | Os09g0369000 | 1.262473343 | 8.25E-71    |
| Os09g0279200 | -1.008160671 | 1.44E-07    | Os01g0749400 | 1.262453791 | 1.30E-103   |
| Os06g0649700 | -1.008061512 | 0.026094849 | Os02g0175700 | 1.261685514 | 0.015567095 |
| Os09g0322000 | -1.008014486 | 8.25E-05    | Os06g0709400 | 1.261465665 | 3.27E-07    |
| Os09g0463600 | -1.00745052  | 2.42E-05    | Os02g0163533 | 1.261168191 | 2.34E-28    |
| Os06g0699500 | -1.006988743 | 1.00E-26    | Os05g0103800 | 1.259853932 | 0.014199068 |
| Os10g0550400 | -1.00662901  | 0.001436688 | Os12g0109750 | 1.259714381 | 0.038079027 |
| Os11g0291475 | -1.006449957 | 3.46E-05    | Os04g0568800 | 1.259541505 | 1.75E-11    |
| Os03g0268600 | -1.00630395  | 9.18E-15    | Os11g0453550 | 1.259333743 | 0.043535584 |
| Os07g0470400 | -1.005206797 | 7.43E-07    | Os02g0677600 | 1.258560529 | 0.006089824 |
| Os04g0434500 | -1.004981875 | 2.19E-29    | Os11g0161133 | 1.258524488 | 0.006419485 |
| Os04g0419800 | -1.004843589 | 8.50E-07    | Os06g0259000 | 1.257696781 | 2.95E-64    |
| Os07g0116900 | -1.004819534 | 0.003150863 | Os10g0442532 | 1.256804909 | 2.58E-118   |
| Os02g0282500 | -1.004759087 | 3.52E-07    | Os11g0666000 | 1.256141624 | 3.88E-05    |
| Os08g0464000 | -1.003818965 | 5.93E-53    | Os02g0190300 | 1.256127275 | 0.030436322 |
| Os06g0288300 | -1.003723525 | 0.000196766 | Os04g0137450 | 1.255355095 | 0.016185261 |
| Os02g0575700 | -1.003567626 | 1.02E-17    | Os01g0750500 | 1.255266502 | 4.13E-13    |
| Os06g0148100 | -1.003439526 | 0.005371285 | Os08g0457000 | 1.254870594 | 2.61E-29    |
| Os04g0620600 | -1.003381685 | 2.00E-11    | Os01g0944000 | 1.254420361 | 1.90E-52    |
| Os08g0220400 | -1.003096311 | 4.68E-10    | Os05g0444500 | 1.25398945  | 0.000230284 |

|              |              |             |              |             |             |
|--------------|--------------|-------------|--------------|-------------|-------------|
| Os04g0639700 | -1.002658924 | 0.002856364 | Os12g0118200 | 1.253879968 | 1.97E-07    |
| Os02g0534400 | -1.002593004 | 0.000328143 | Os01g0782200 | 1.253726272 | 4.41E-08    |
| Os05g0128100 | -1.002308133 | 1.38E-06    | Os03g0238700 | 1.253692766 | 2.47E-09    |
| Os07g0168300 | -1.001672515 | 2.02E-08    | Os09g0560100 | 1.252767104 | 2.19E-16    |
| Os11g0243750 | -1.00094008  | 0.000720125 | Os08g0154225 | 1.252753514 | 0.000703322 |
| Os07g0654700 | -1.001263188 | 0.007468574 | Os02g0528750 | 1.252641984 | 4.12E-16    |
|              |              |             | Os12g0131701 | 1.252038117 | 4.23E-34    |
|              |              |             | Os04g0127800 | 1.251963122 | 4.28E-09    |
|              |              |             | Os06g0714800 | 1.25087695  | 7.55E-18    |
|              |              |             | Os09g0246300 | 1.249956457 | 1.79E-28    |
|              |              |             | Os07g0181200 | 1.24962387  | 0.042183365 |
|              |              |             | Os06g0664100 | 1.249488687 | 2.13E-06    |
|              |              |             | Os01g0974900 | 1.248949002 | 0.001310546 |
|              |              |             | Os07g0474700 | 1.248529084 | 8.68E-22    |
|              |              |             | Os03g0327900 | 1.247571474 | 0.004472523 |
|              |              |             | Os08g0450700 | 1.247415564 | 8.74E-09    |
|              |              |             | Os02g0167200 | 1.246995573 | 4.21E-18    |
|              |              |             | Os04g0530500 | 1.246567517 | 8.92E-49    |
|              |              |             | Os08g0170100 | 1.246322435 | 1.79E-07    |
|              |              |             | Os05g0560100 | 1.245565386 | 1.84E-53    |
|              |              |             | Os02g0103300 | 1.245453235 | 0.047645663 |
|              |              |             | Os02g0462401 | 1.245308834 | 5.80E-06    |
|              |              |             | Os03g0155300 | 1.24491067  | 0.038002927 |
|              |              |             | Os06g0238600 | 1.244472865 | 0.029110433 |
|              |              |             | Os03g0604600 | 1.243305555 | 3.35E-13    |
|              |              |             | Os03g0118400 | 1.243291737 | 9.59E-11    |
|              |              |             | Os11g0172300 | 1.241970632 | 1.22E-06    |
|              |              |             | Os03g0636800 | 1.241953282 | 5.00E-84    |
|              |              |             | Os09g0556700 | 1.241105001 | 1.25E-53    |
|              |              |             | Os03g0310400 | 1.240896999 | 3.12E-22    |
|              |              |             | Os11g0438400 | 1.240844434 | 1.79E-45    |
|              |              |             | Os06g0671900 | 1.239557173 | 2.12E-87    |
|              |              |             | Os05g0581300 | 1.239532552 | 1.87E-05    |
|              |              |             | Os06g0506100 | 1.239019733 | 6.83E-12    |
|              |              |             | Os03g0201800 | 1.237866422 | 0.044127257 |
|              |              |             | Os12g0613850 | 1.237461994 | 2.46E-43    |
|              |              |             | Os01g0638000 | 1.235839487 | 0.015800976 |
|              |              |             | Os02g0323000 | 1.234845193 | 1.62E-10    |
|              |              |             | Os01g0191200 | 1.234814198 | 5.89E-37    |
|              |              |             | Os05g0193800 | 1.234487684 | 3.03E-24    |
|              |              |             | Os02g0226300 | 1.234277046 | 7.02E-24    |
|              |              |             | Os01g0629500 | 1.234232441 | 0.027512307 |
|              |              |             | Os01g0794600 | 1.234119794 | 0.006859933 |
|              |              |             | Os02g0685200 | 1.233413948 | 2.55E-07    |
|              |              |             | Os02g0762800 | 1.233407433 | 3.38E-18    |
|              |              |             | Os05g0365200 | 1.233304395 | 3.40E-08    |
|              |              |             | Os10g0463800 | 1.232990693 | 2.36E-23    |
|              |              |             | Os07g0486000 | 1.230936212 | 1.81E-12    |
|              |              |             | Os05g0373500 | 1.230935501 | 5.49E-38    |
|              |              |             | Os05g0497500 | 1.230765434 | 1.04E-27    |
|              |              |             | Os11g0537375 | 1.230713085 | 4.03E-12    |
|              |              |             | Os06g0684900 | 1.230296605 | 0.003067626 |
|              |              |             | Os11g0519500 | 1.229490744 | 4.68E-16    |
|              |              |             | Os02g0830300 | 1.229473274 | 2.96E-12    |
|              |              |             | Os02g0727300 | 1.229216571 | 1.11E-14    |
|              |              |             | Os02g0161200 | 1.228447911 | 2.69E-57    |
|              |              |             | Os05g0333500 | 1.227706038 | 0.000878449 |
|              |              |             | Os04g0218600 | 1.227473561 | 1.59E-06    |
|              |              |             | Os04g0500900 | 1.22658629  | 2.29E-16    |
|              |              |             | Os01g0228901 | 1.22658113  | 6.00E-33    |
|              |              |             | Os05g0440250 | 1.226287581 | 0.00073352  |
|              |              |             | Os07g0691700 | 1.225930837 | 2.30E-08    |
|              |              |             | Os01g0299200 | 1.225567281 | 3.19E-06    |
|              |              |             | Os12g0111600 | 1.22493546  | 0.025408237 |
|              |              |             | Os10g0154566 | 1.224923867 | 0.007531958 |
|              |              |             | Os01g0524500 | 1.224621395 | 1.51E-11    |
|              |              |             | Os03g0645250 | 1.224609228 | 1.82E-18    |
|              |              |             | Os01g0851100 | 1.224097732 | 1.26E-10    |
|              |              |             | Os04g0177400 | 1.224062223 | 4.82E-14    |
|              |              |             | Os11g0153100 | 1.223823707 | 3.98E-08    |
|              |              |             | Os07g0624900 | 1.222956949 | 0.002390543 |

|              |             |             |
|--------------|-------------|-------------|
| Os03g0281300 | 1.222772888 | 0.002119379 |
| Os04g0598000 | 1.222609276 | 4.95E-129   |
| Os05g0548200 | 1.22248222  | 1.72E-06    |
| Os01g0723100 | 1.22214176  | 9.28E-06    |
| Os03g0436300 | 1.222013791 | 1.32E-05    |
| Os10g0539600 | 1.221969127 | 5.74E-21    |
| Os01g0227200 | 1.221336016 | 8.68E-12    |
| Os05g0495600 | 1.221070816 | 1.12E-10    |
| Os07g0106700 | 1.220989128 | 2.52E-22    |
| Os04g0626300 | 1.219949635 | 0.002871306 |
| Os11g0263000 | 1.219586287 | 0.005183813 |
| Os02g0166875 | 1.219096606 | 0.028410483 |
| Os04g0201900 | 1.218184613 | 7.37E-09    |
| Os12g0456700 | 1.217884081 | 6.65E-06    |
| Os03g0814600 | 1.216868444 | 1.46E-08    |
| Os01g0955700 | 1.216301221 | 2.55E-80    |
| Os01g0557400 | 1.215879451 | 9.33E-14    |
| Os03g0809200 | 1.215577184 | 0.00871155  |
| Os03g0254400 | 1.215519547 | 4.20E-40    |
| Os02g0707900 | 1.214321858 | 1.44E-20    |
| Os05g0163500 | 1.213712264 | 0.01571923  |
| Os01g0930200 | 1.213335486 | 5.02E-75    |
| Os04g0421850 | 1.212955032 | 0.002439189 |
| Os09g0315000 | 1.212778606 | 5.48E-11    |
| Os10g0550066 | 1.211932801 | 0.005971188 |
| Os05g0103300 | 1.211191195 | 0.003552217 |
| Os03g0189100 | 1.21102501  | 4.38E-06    |
| Os02g0640401 | 1.210442967 | 0.013828166 |
| Os03g0711250 | 1.2097789   | 2.07E-17    |
| Os11g0479100 | 1.209259085 | 4.37E-07    |
| Os09g0547100 | 1.209063807 | 1.39E-12    |
| Os11g0572700 | 1.208794331 | 3.29E-83    |
| Os04g0219000 | 1.208775833 | 8.47E-40    |
| Os06g0298200 | 1.208747437 | 5.31E-79    |
| Os05g0362000 | 1.208501801 | 0.00098397  |
| Os07g0490100 | 1.208250849 | 0.001669906 |
| Os04g0606000 | 1.207567232 | 2.03E-07    |
| Os04g0577700 | 1.206075839 | 0.001410229 |
| Os05g0456100 | 1.204435347 | 8.61E-08    |
| Os06g0707800 | 1.204257265 | 1.72E-29    |
| Os10g0495466 | 1.203891558 | 0.000820866 |
| Os07g0112400 | 1.20243226  | 0.017912801 |
| Os07g0100600 | 1.201803245 | 7.60E-05    |
| Os02g0256000 | 1.20107741  | 8.48E-05    |
| Os04g0643200 | 1.200305726 | 1.81E-35    |
| Os02g0506400 | 1.199910968 | 0.001299238 |
| Os10g0345100 | 1.199534755 | 3.48E-06    |
| Os05g0486100 | 1.199037427 | 1.75E-09    |
| Os03g0300100 | 1.198449175 | 2.20E-10    |
| Os06g0710800 | 1.198440426 | 5.77E-11    |
| Os11g0112200 | 1.198156162 | 0.015283442 |
| Os04g0681500 | 1.197053773 | 0.002595267 |
| Os08g0372166 | 1.196899256 | 0.000413842 |
| Os05g0569300 | 1.196586487 | 9.18E-99    |
| Os05g0569900 | 1.196196    | 1.40E-11    |
| Os06g0192800 | 1.195763993 | 0.00606981  |
| Os11g0102700 | 1.19567489  | 3.46E-10    |
| Os04g0608600 | 1.194889087 | 0.000132369 |
| Os01g0743200 | 1.19447328  | 6.21E-17    |
| Os02g0799700 | 1.194323916 | 0.000113261 |
| Os10g0195600 | 1.193926174 | 0.002020266 |
| Os07g0518500 | 1.193877433 | 0.001235516 |
| Os07g0496500 | 1.193833453 | 4.64E-32    |
| Os03g0669800 | 1.193547186 | 8.10E-43    |
| Os01g0191400 | 1.19344067  | 0.000944015 |
| Os07g0168900 | 1.192069498 | 0.008663267 |
| Os02g0681000 | 1.192042836 | 2.06E-24    |
| Os05g0208000 | 1.192026108 | 1.82E-41    |
| Os03g0151400 | 1.191318941 | 3.95E-85    |
| Os12g0131400 | 1.190076178 | 0.003009153 |
| Os02g0771400 | 1.189725081 | 0.000268202 |

|              |             |             |
|--------------|-------------|-------------|
| Os01g0777000 | 1.189248363 | 5.92E-49    |
| Os01g0715500 | 1.189122583 | 3.13E-54    |
| Os02g0820900 | 1.186493495 | 6.86E-63    |
| Os04g0495700 | 1.186161693 | 2.18E-10    |
| Os03g0625800 | 1.184865319 | 4.73E-17    |
| Os04g0692800 | 1.184550628 | 1.12E-06    |
| Os03g0699700 | 1.18391646  | 2.25E-14    |
| Os11g0679700 | 1.183080577 | 0.000499197 |
| Os05g0255800 | 1.182844455 | 2.79E-36    |
| Os03g0419100 | 1.182167605 | 1.88E-24    |
| Os02g0735800 | 1.181729034 | 4.58E-19    |
| Os08g0476000 | 1.181044584 | 2.28E-56    |
| Os12g0580400 | 1.180435538 | 1.20E-08    |
| Os09g0488800 | 1.17969729  | 9.34E-69    |
| Os09g0109600 | 1.17967575  | 6.51E-06    |
| Os07g0477500 | 1.179580928 | 7.07E-52    |
| Os09g0499400 | 1.179197191 | 1.31E-29    |
| Os08g0155550 | 1.178703173 | 0.002467415 |
| Os03g0338200 | 1.178619131 | 4.59E-53    |
| Os02g0175100 | 1.178374026 | 2.44E-70    |
| Os01g0763900 | 1.177883628 | 2.34E-45    |
| Os02g0116100 | 1.177632143 | 3.28E-09    |
| Os01g0158900 | 1.17705008  | 2.44E-70    |
| Os02g0744682 | 1.176857459 | 0.033887972 |
| Os09g0429200 | 1.176430366 | 1.51E-07    |
| Os03g0844000 | 1.174909716 | 1.45E-16    |
| Os11g0292050 | 1.173840274 | 2.16E-91    |
| Os08g0342300 | 1.173370893 | 6.48E-10    |
| Os03g0379300 | 1.173031104 | 3.39E-19    |
| Os01g0551000 | 1.172811164 | 0.030842086 |
| Os02g0299300 | 1.171884422 | 3.25E-05    |
| Os03g0195400 | 1.171410135 | 1.54E-15    |
| Os05g0104650 | 1.17119332  | 6.76E-15    |
| Os12g0632000 | 1.170488306 | 6.15E-207   |
| Os10g0136950 | 1.170482199 | 0.002747599 |
| Os02g0818800 | 1.169733478 | 4.22E-05    |
| Os10g0410100 | 1.16958507  | 9.80E-16    |
| Os12g0581350 | 1.169508159 | 5.04E-14    |
| Os05g0548700 | 1.168541904 | 0.005873216 |
| Os04g0503200 | 1.168144202 | 1.18E-08    |
| Os07g0300100 | 1.167899    | 0.000144179 |
| Os06g0698748 | 1.167744828 | 0.003010965 |
| Os10g0130500 | 1.167662081 | 3.06E-50    |
| Os02g0180900 | 1.167420982 | 0.03974717  |
| Os05g0158700 | 1.166944047 | 0.000250946 |
| Os03g0169300 | 1.166218689 | 4.21E-05    |
| Os12g0160300 | 1.165636713 | 1.31E-08    |
| Os03g0428800 | 1.16533544  | 3.68E-128   |
| Os03g0633800 | 1.165234203 | 0.010054887 |
| Os11g0444700 | 1.164685495 | 8.29E-50    |
| Os04g0372201 | 1.16465327  | 1.25E-21    |
| Os08g0132700 | 1.164505625 | 3.16E-18    |
| Os01g0668400 | 1.164289695 | 9.33E-08    |
| Os06g0138700 | 1.162765304 | 9.60E-16    |
| Os02g0236800 | 1.162153736 | 7.46E-13    |
| Os03g0634000 | 1.161842494 | 5.17E-38    |
| Os01g0646000 | 1.161623955 | 3.85E-06    |
| Os01g0807532 | 1.161101341 | 1.14E-06    |
| Os12g0133400 | 1.160843118 | 0.004456073 |
| Os02g0329300 | 1.160833102 | 0.000257999 |
| Os05g0572900 | 1.160114395 | 8.73E-08    |
| Os01g0743500 | 1.159325708 | 0.000179728 |
| Os07g0192800 | 1.159245815 | 1.01E-29    |
| Os01g0314800 | 1.158921279 | 0.009172733 |
| Os05g0495300 | 1.158883793 | 7.87E-70    |
| Os05g0446600 | 1.158761399 | 1.06E-06    |
| Os06g0696500 | 1.158369543 | 1.70E-11    |
| Os01g0835600 | 1.158141677 | 7.48E-67    |
| Os01g0806600 | 1.157538316 | 0.02925339  |
| Os08g0263400 | 1.157293299 | 0.018606376 |
| Os11g0461000 | 1.156798662 | 5.25E-09    |

|              |             |             |
|--------------|-------------|-------------|
| Os04g0600200 | 1.156381839 | 5.89E-09    |
| Os10g0135250 | 1.156257941 | 3.03E-09    |
| Os03g0825800 | 1.155169847 | 0.046773852 |
| Os12g0270300 | 1.153640846 | 2.55E-132   |
| Os12g0134300 | 1.153409588 | 0.003588148 |
| Os12g0458900 | 1.152075203 | 4.39E-16    |
| Os07g0120200 | 1.152053399 | 2.47E-05    |
| Os01g0705400 | 1.151830085 | 0.001500316 |
| Os03g0397600 | 1.151419075 | 0.000620039 |
| Os04g0433300 | 1.15070747  | 1.08E-05    |
| Os02g0226900 | 1.150145753 | 1.42E-07    |
| Os03g0656500 | 1.150055832 | 1.92E-24    |
| Os03g0287500 | 1.149528662 | 1.66E-06    |
| Os03g0422900 | 1.149293753 | 0.001670809 |
| Os12g0405400 | 1.148124844 | 1.41E-39    |
| Os01g0849500 | 1.148094053 | 0.008645611 |
| Os08g0324300 | 1.147879772 | 9.66E-10    |
| Os12g0552400 | 1.147366255 | 3.88E-05    |
| Os02g0726700 | 1.146938535 | 2.30E-11    |
| Os01g0115900 | 1.14673633  | 0.003291679 |
| Os08g0323266 | 1.146591896 | 0.000355645 |
| Os02g0470600 | 1.146506288 | 9.48E-05    |
| Os10g0412600 | 1.146336387 | 1.53E-46    |
| Os02g0258900 | 1.145874442 | 3.85E-22    |
| Os01g0818700 | 1.145035453 | 0.0047292   |
| Os06g0657500 | 1.144631395 | 0.000475051 |
| Os09g0115900 | 1.144480576 | 2.03E-07    |
| Os11g0104150 | 1.143725018 | 2.17E-22    |
| Os10g0369750 | 1.143232457 | 6.78E-11    |
| Os03g0235000 | 1.142912802 | 0.001816442 |
| Os03g0660000 | 1.142195497 | 0.030878565 |
| Os05g0527100 | 1.141727344 | 0.036803884 |
| Os01g0583100 | 1.1410975   | 2.84E-100   |
| Os03g0221100 | 1.140317761 | 4.25E-14    |
| Os07g0549300 | 1.139591276 | 4.24E-34    |
| Os08g0191433 | 1.138545681 | 3.04E-45    |
| Os10g0487900 | 1.138357407 | 5.46E-11    |
| Os07g0614100 | 1.138159231 | 3.80E-07    |
| Os03g0808100 | 1.137997854 | 1.49E-52    |
| Os09g0478600 | 1.137987946 | 5.84E-53    |
| Os03g0336700 | 1.137983618 | 1.80E-89    |
| Os04g0378575 | 1.13790521  | 1.62E-07    |
| Os06g0499301 | 1.137437271 | 1.89E-21    |
| Os03g0163500 | 1.137356649 | 1.87E-34    |
| Os07g0696000 | 1.136952418 | 2.27E-49    |
| Os07g0614000 | 1.135745432 | 1.18E-09    |
| Os06g0654900 | 1.134828352 | 1.12E-22    |
| Os09g0518600 | 1.134795698 | 5.91E-13    |
| Os03g0844301 | 1.134698326 | 0.022285717 |
| Os05g0467900 | 1.134557707 | 2.90E-06    |
| Os01g0833000 | 1.133361285 | 3.44E-07    |
| Os10g0431000 | 1.132966936 | 1.86E-40    |
| Os03g0655100 | 1.132557763 | 0.008854446 |
| Os03g0701800 | 1.132468517 | 4.00E-90    |
| Os08g0428900 | 1.132112928 | 6.31E-81    |
| Os06g0294000 | 1.130770594 | 0.002131283 |
| Os06g0300300 | 1.128378602 | 0.013827335 |
| Os03g0437600 | 1.128121103 | 0.020357537 |
| Os07g0143200 | 1.127824933 | 4.70E-05    |
| Os10g0547000 | 1.127819095 | 5.77E-14    |
| Os04g0514150 | 1.126480006 | 0.001160203 |
| Os10g0155800 | 1.126433185 | 1.32E-18    |
| Os01g0858350 | 1.126067478 | 7.15E-14    |
| Os09g0444500 | 1.125873445 | 0.040363937 |
| Os01g0252600 | 1.125403623 | 0.042908064 |
| Os10g0502000 | 1.125044787 | 1.22E-38    |
| Os08g0446400 | 1.124128696 | 1.25E-09    |
| Os06g0165500 | 1.123428288 | 0.002835352 |
| Os12g0510750 | 1.123334325 | 0.007861051 |
| Os01g0626100 | 1.12293039  | 1.80E-07    |
| Os02g0823700 | 1.122245928 | 8.89E-11    |

|              |             |             |
|--------------|-------------|-------------|
| Os07g0584100 | 1.1219467   | 1.19E-08    |
| Os02g0681632 | 1.120094003 | 0.014552834 |
| Os05g0513300 | 1.119566643 | 2.80E-11    |
| Os03g0684500 | 1.118725694 | 4.26E-12    |
| Os06g0172000 | 1.118470135 | 1.48E-18    |
| Os02g0620400 | 1.118285934 | 2.78E-63    |
| Os01g0136800 | 1.117826759 | 0.036382244 |
| Os07g0150100 | 1.117336052 | 2.48E-85    |
| Os07g0192000 | 1.116987375 | 0.001807286 |
| Os11g0539000 | 1.116793339 | 3.20E-08    |
| Os08g0191900 | 1.115989379 | 5.14E-37    |
| Os09g0439500 | 1.115960665 | 0.003180228 |
| Os03g0848700 | 1.115755988 | 3.45E-07    |
| Os02g0201500 | 1.115646825 | 1.91E-25    |
| Os01g0162400 | 1.115197475 | 0.017889527 |
| Os03g0320850 | 1.114685768 | 9.72E-11    |
| Os11g0118500 | 1.114554158 | 6.03E-19    |
| Os04g0510600 | 1.114197097 | 0.007501783 |
| Os06g0601100 | 1.113881969 | 2.90E-12    |
| Os04g0416100 | 1.113834685 | 8.15E-11    |
| Os07g0255200 | 1.113367944 | 5.85E-16    |
| Os02g0742900 | 1.113326656 | 1.19E-06    |
| Os12g0230133 | 1.113234024 | 7.67E-06    |
| Os05g0499800 | 1.112541946 | 5.11E-10    |
| Os05g0382000 | 1.112518146 | 1.02E-08    |
| Os12g0605200 | 1.111585283 | 3.22E-14    |
| Os02g0792000 | 1.11097538  | 0.011749657 |
| Os03g0364700 | 1.110875286 | 3.08E-35    |
| Os05g0316100 | 1.110618806 | 8.59E-13    |
| Os03g0593700 | 1.11019348  | 5.47E-44    |
| Os12g0430000 | 1.109304271 | 6.82E-45    |
| Os11g0240600 | 1.109271056 | 3.18E-17    |
| Os11g0133700 | 1.109208226 | 2.85E-06    |
| Os03g0792800 | 1.108809841 | 1.77E-22    |
| Os09g0305300 | 1.108686191 | 3.59E-06    |
| Os03g0817700 | 1.107737342 | 1.94E-14    |
| Os04g0227100 | 1.107391569 | 2.64E-12    |
| Os05g0448675 | 1.106606154 | 0.000580873 |
| Os01g0725000 | 1.106542933 | 2.36E-06    |
| Os06g0182300 | 1.10558768  | 7.56E-05    |
| Os08g0499200 | 1.105580411 | 4.03E-28    |
| Os02g0794900 | 1.104863825 | 1.94E-25    |
| Os01g0607800 | 1.104413841 | 0.000868216 |
| Os03g0812400 | 1.103564203 | 0.008157838 |
| Os01g0693400 | 1.103459825 | 2.80E-40    |
| Os07g0602900 | 1.103267277 | 6.18E-53    |
| Os01g0563700 | 1.102550012 | 1.26E-05    |
| Os01g0849000 | 1.102049413 | 2.83E-06    |
| Os02g0699433 | 1.102036125 | 1.84E-10    |
| Os09g0415300 | 1.101866983 | 6.50E-15    |
| Os09g0471400 | 1.101747125 | 2.57E-07    |
| Os01g0839400 | 1.101514715 | 6.86E-05    |
| Os06g0241200 | 1.101297298 | 4.47E-12    |
| Os06g0608000 | 1.100929732 | 0.003088674 |
| Os03g0415351 | 1.100495757 | 0.030331547 |
| Os03g0841900 | 1.100391531 | 2.20E-22    |
| Os09g0287000 | 1.100256854 | 0.038062991 |
| Os05g0497200 | 1.10013004  | 1.22E-23    |
| Os02g0200300 | 1.099670704 | 7.34E-10    |
| Os02g0464900 | 1.098998211 | 5.76E-07    |
| Os03g0718800 | 1.098131735 | 3.05E-05    |
| Os05g0571600 | 1.097514753 | 1.50E-16    |
| Os01g0939100 | 1.097387555 | 0.010437139 |
| Os01g0138300 | 1.097286881 | 0.046619234 |
| Os11g0435301 | 1.096188391 | 2.48E-05    |
| Os06g0676600 | 1.095933574 | 0.001190544 |
| Os01g0327900 | 1.095463425 | 2.13E-10    |
| Os04g0640200 | 1.094390475 | 1.33E-07    |
| Os08g0230300 | 1.093668695 | 1.13E-12    |
| Os08g0499700 | 1.092766727 | 2.15E-06    |
| Os01g0127700 | 1.091856604 | 1.06E-14    |

|              |             |             |
|--------------|-------------|-------------|
| Os06g0202700 | 1.091777218 | 2.43E-05    |
| Os05g0241100 | 1.09020937  | 0.003715457 |
| Os05g0249800 | 1.089986554 | 6.15E-07    |
| Os07g0591800 | 1.089928973 | 2.43E-31    |
| Os05g0307200 | 1.089810916 | 4.41E-08    |
| Os03g0187100 | 1.08978679  | 5.74E-98    |
| Os03g0346200 | 1.089638075 | 0.001935565 |
| Os01g0519050 | 1.089398845 | 0.037397889 |
| Os09g0565300 | 1.089118025 | 0.049207922 |
| Os01g0576000 | 1.089069965 | 3.82E-05    |
| Os03g0110900 | 1.089028991 | 1.96E-08    |
| Os04g0308100 | 1.088824189 | 0.001056048 |
| Os01g0779100 | 1.088304519 | 7.05E-17    |
| Os04g0395100 | 1.087693242 | 5.25E-15    |
| Os11g0256050 | 1.087518657 | 8.92E-13    |
| Os08g0331900 | 1.087444504 | 0.004064471 |
| Os01g0128300 | 1.087140039 | 1.57E-60    |
| Os05g0231700 | 1.087044411 | 1.25E-34    |
| Os01g0848300 | 1.086829193 | 1.23E-05    |
| Os02g0732900 | 1.085997481 | 1.55E-40    |
| Os07g0642600 | 1.085795619 | 9.77E-67    |
| Os02g0784700 | 1.08561441  | 4.35E-102   |
| Os12g0465800 | 1.085482079 | 1.63E-07    |
| Os03g0588600 | 1.085341126 | 1.02E-08    |
| Os03g0800050 | 1.085127928 | 2.72E-07    |
| Os01g0813100 | 1.084490708 | 1.54E-18    |
| Os01g0788700 | 1.084392594 | 7.08E-06    |
| Os01g0709000 | 1.084085632 | 0.00380017  |
| Os03g0147001 | 1.083943065 | 0.001024399 |
| Os08g0332600 | 1.083290836 | 2.88E-08    |
| Os07g0600300 | 1.083088894 | 1.18E-10    |
| Os09g0502500 | 1.08289529  | 0.014213207 |
| Os02g0147300 | 1.082860973 | 6.47E-20    |
| Os06g0342750 | 1.082582909 | 1.11E-05    |
| Os12g0578200 | 1.081356162 | 3.86E-90    |
| Os10g0494950 | 1.081320717 | 2.93E-12    |
| Os10g0550775 | 1.08058671  | 0.012061566 |
| Os09g0402300 | 1.080011671 | 1.12E-62    |
| Os01g0857600 | 1.079897272 | 0.027189845 |
| Os08g0531200 | 1.079648467 | 1.14E-53    |
| Os02g0758100 | 1.078814136 | 7.04E-35    |
| Os12g0210500 | 1.078559505 | 1.53E-17    |
| Os02g0538400 | 1.078508466 | 1.53E-11    |
| Os03g0164400 | 1.078137846 | 7.79E-25    |
| Os07g0564500 | 1.077983429 | 0.018001996 |
| Os02g0152950 | 1.077929417 | 0.017035304 |
| Os01g0182832 | 1.077541011 | 0.000942524 |
| Os02g0286891 | 1.077507479 | 0.004989079 |
| Os04g0386700 | 1.076090238 | 6.22E-11    |
| Os03g0795200 | 1.075966845 | 1.61E-08    |
| Os12g0157066 | 1.075231946 | 0.017271511 |
| Os03g0586700 | 1.074469181 | 1.36E-73    |
| Os05g0439100 | 1.074063831 | 2.17E-12    |
| Os04g0410200 | 1.073811561 | 4.13E-42    |
| Os04g0462200 | 1.073615785 | 3.05E-08    |
| Os12g0120100 | 1.073050037 | 0.011363796 |
| Os11g0546500 | 1.072803257 | 1.90E-08    |
| Os02g0111600 | 1.072692967 | 3.84E-06    |
| Os07g0649300 | 1.072491064 | 0.00031284  |
| Os05g0119850 | 1.072404585 | 2.02E-97    |
| Os02g0705500 | 1.07134772  | 2.09E-08    |
| Os10g0363600 | 1.070568515 | 5.13E-17    |
| Os11g0132501 | 1.070013833 | 9.34E-34    |
| Os02g0564300 | 1.068900812 | 7.30E-23    |
| Os08g0393900 | 1.06800272  | 3.60E-21    |
| Os04g0365100 | 1.067249125 | 0.003464021 |
| Os09g0557700 | 1.066932618 | 1.90E-17    |
| Os03g0168000 | 1.066465913 | 0.000233196 |
| Os02g0269200 | 1.066379821 | 3.01E-102   |
| Os02g0109900 | 1.066323228 | 9.39E-14    |
| Os06g0114366 | 1.065994128 | 0.027691799 |



|              |             |             |
|--------------|-------------|-------------|
| Os02g0107200 | 1.065693939 | 4.87E-09    |
| Os07g0442000 | 1.064490204 | 3.66E-97    |
| Os05g0441750 | 1.063536494 | 0.006252809 |
| Os01g0105900 | 1.063356057 | 1.22E-65    |
| Os08g0215200 | 1.063248122 | 1.46E-32    |
| Os12g0110100 | 1.063162365 | 0.000853397 |
| Os03g0757000 | 1.063075724 | 0.000229141 |
| Os02g0293350 | 1.062327994 | 2.21E-05    |
| Os09g0558000 | 1.061205037 | 2.37E-16    |
| Os08g0396700 | 1.061073897 | 2.75E-37    |
| Os06g0517700 | 1.060189261 | 7.49E-11    |
| Os10g0205300 | 1.060165799 | 1.46E-10    |
| Os04g0635700 | 1.059279041 | 2.57E-06    |
| Os09g0520700 | 1.059088968 | 9.55E-137   |
| Os01g0274300 | 1.05891626  | 0.027713613 |
| Os01g0934500 | 1.058770511 | 2.13E-09    |
| Os08g0202300 | 1.0582141   | 0.002730228 |
| Os04g0118800 | 1.057397692 | 0.046368092 |
| Os05g0369300 | 1.057393764 | 0.000214895 |
| Os11g0202600 | 1.056800031 | 2.11E-59    |
| Os01g0930500 | 1.056749128 | 0.000595688 |
| Os12g0553200 | 1.056367409 | 4.69E-14    |
| Os03g0363850 | 1.056264191 | 8.26E-11    |
| Os05g0121750 | 1.055664541 | 0.006208335 |
| Os01g0803200 | 1.055276498 | 3.63E-26    |
| Os10g0495416 | 1.055107231 | 1.37E-14    |
| Os01g0871100 | 1.054905128 | 3.25E-12    |
| Os08g0249300 | 1.054660995 | 3.74E-40    |
| Os09g0449600 | 1.054247137 | 1.30E-36    |
| Os03g0756500 | 1.053989438 | 5.64E-32    |
| Os10g0389100 | 1.052768277 | 7.47E-13    |
| Os04g0409200 | 1.052478586 | 1.20E-15    |
| Os08g0504700 | 1.052397622 | 3.56E-43    |
| Os02g0832150 | 1.051413437 | 0.000107777 |
| Os02g0533200 | 1.051372034 | 3.34E-06    |
| Os03g0241900 | 1.050882943 | 9.11E-40    |
| Os12g0186600 | 1.050404454 | 2.79E-09    |
| Os06g0625900 | 1.050095636 | 1.51E-27    |
| Os03g0195475 | 1.049819653 | 9.02E-06    |
| Os06g0669275 | 1.048899773 | 5.80E-25    |
| Os04g0531100 | 1.048562553 | 7.52E-49    |
| Os11g0131800 | 1.048525153 | 4.12E-30    |
| Os02g0280100 | 1.048169574 | 4.00E-67    |
| Os03g0703300 | 1.048059276 | 0.002057678 |
| Os11g0157600 | 1.047802475 | 5.90E-74    |
| Os09g0447900 | 1.047361384 | 0.002652463 |
| Os04g0175300 | 1.047250458 | 4.85E-08    |
| Os07g0141600 | 1.047205785 | 3.46E-08    |
| Os05g0591500 | 1.04717218  | 1.72E-69    |
| Os06g0519400 | 1.046218962 | 1.11E-07    |
| Os09g0546200 | 1.046104141 | 7.25E-07    |
| Os08g0432000 | 1.046023994 | 6.73E-16    |
| Os01g0913300 | 1.045797588 | 0.011005032 |
| Os02g0109501 | 1.044982068 | 5.51E-07    |
| Os07g0595700 | 1.044729308 | 4.77E-12    |
| Os06g0549700 | 1.044240765 | 1.53E-24    |
| Os01g0798800 | 1.043438932 | 0.003734306 |
| Os03g0351100 | 1.043111018 | 7.40E-24    |
| Os07g0661400 | 1.043007776 | 2.04E-63    |
| Os03g0726400 | 1.042648935 | 2.75E-57    |
| Os01g0814300 | 1.042253025 | 3.78E-13    |
| Os03g0140900 | 1.041800583 | 0.017875866 |
| Os02g0293400 | 1.041367546 | 2.93E-12    |
| Os02g0820200 | 1.041265788 | 6.57E-06    |
| Os02g0150450 | 1.040567902 | 0.024939647 |
| Os08g0551300 | 1.040396505 | 1.21E-05    |
| Os10g0136150 | 1.04028568  | 2.58E-13    |
| Os01g0139000 | 1.039869595 | 0.000205478 |
| Os12g0291000 | 1.039736129 | 8.09E-50    |
| Os12g0155250 | 1.038660627 | 0.00304095  |
| Os06g0671000 | 1.038478848 | 0.004401272 |

|              |             |             |
|--------------|-------------|-------------|
| Os07g0693400 | 1.037292801 | 1.54E-30    |
| Os02g0306250 | 1.037105466 | 0.00836529  |
| Os07g0192700 | 1.035835578 | 0.000393455 |
| Os03g0173700 | 1.034630364 | 7.03E-54    |
| Os01g0585400 | 1.034590552 | 0.007322276 |
| Os02g0306100 | 1.034584167 | 5.03E-05    |
| Os05g0353500 | 1.034357494 | 1.09E-13    |
| Os09g0491652 | 1.033297775 | 0.001880113 |
| Os09g0459900 | 1.033251659 | 2.26E-05    |
| Os08g0552100 | 1.032546518 | 0.000449611 |
| Os05g0453500 | 1.032283422 | 8.74E-46    |
| Os01g0835500 | 1.032121499 | 0.002076633 |
| Os04g0448700 | 1.032110958 | 3.12E-05    |
| Os01g0600400 | 1.031413814 | 3.26E-15    |
| Os04g0613900 | 1.031136663 | 9.70E-12    |
| Os11g0672300 | 1.030826821 | 0.006448353 |
| Os10g0499600 | 1.030660903 | 2.93E-32    |
| Os08g0522500 | 1.028621519 | 2.84E-39    |
| Os01g0609900 | 1.028389516 | 2.82E-11    |
| Os01g0281600 | 1.028370723 | 0.033216401 |
| Os11g0162000 | 1.027463153 | 1.75E-53    |
| Os06g0235300 | 1.026914135 | 1.20E-13    |
| Os08g0241900 | 1.026164302 | 0.012180118 |
| Os03g0387850 | 1.026135878 | 0.038093942 |
| Os08g0363900 | 1.025284874 | 0.029902819 |
| Os08g0126700 | 1.025159979 | 6.92E-08    |
| Os02g0652800 | 1.024494665 | 1.40E-07    |
| Os04g0420700 | 1.024312099 | 2.25E-07    |
| Os05g0473401 | 1.023511652 | 0.016360277 |
| Os04g0349600 | 1.023236038 | 0.044515175 |
| Os11g0577700 | 1.022609583 | 1.26E-09    |
| Os08g0440300 | 1.022103361 | 1.27E-50    |
| Os03g0698350 | 1.021801131 | 1.79E-13    |
| Os03g0444900 | 1.021501592 | 2.68E-18    |
| Os11g0117300 | 1.02008516  | 0.01936154  |
| Os03g0133000 | 1.020076655 | 4.27E-05    |
| Os03g0203700 | 1.02003238  | 3.75E-07    |
| Os01g0640700 | 1.019901836 | 0.001188603 |
| Os01g0844900 | 1.019563764 | 1.31E-07    |
| Os11g0276000 | 1.019549939 | 5.28E-18    |
| Os12g0197600 | 1.018838845 | 9.67E-18    |
| Os03g0103900 | 1.018404507 | 0.017251614 |
| Os12g0153600 | 1.017947194 | 4.56E-08    |
| Os02g0176400 | 1.017801357 | 2.36E-06    |
| Os06g0142300 | 1.017370168 | 2.64E-12    |
| Os03g0769500 | 1.017163085 | 0.001293624 |
| Os01g0563500 | 1.015184926 | 5.86E-09    |
| Os01g0252900 | 1.014899708 | 1.88E-13    |
| Os02g0492900 | 1.014899214 | 1.66E-49    |
| Os11g0130500 | 1.014491796 | 0.047956295 |
| Os05g0119200 | 1.014148584 | 0.015204752 |
| Os07g0493850 | 1.013652876 | 0.000937344 |
| Os11g0673200 | 1.013637404 | 2.20E-20    |
| Os04g0388601 | 1.012979885 | 8.97E-13    |
| Os11g0460900 | 1.012894807 | 0.000585448 |
| Os09g0544400 | 1.012443678 | 0.0032941   |
| Os04g0384800 | 1.012416954 | 3.61E-05    |
| Os04g0556900 | 1.010901377 | 0.005100903 |
| Os09g0436800 | 1.010485852 | 6.03E-20    |
| Os01g0747400 | 1.010284143 | 0.024279857 |
| Os02g0793200 | 1.010103405 | 2.35E-09    |
| Os12g0626000 | 1.010077577 | 0.041488447 |
| Os02g0173100 | 1.009446427 | 8.02E-53    |
| Os06g0619000 | 1.009082274 | 8.82E-12    |
| Os10g0457700 | 1.009066368 | 2.47E-41    |
| Os04g0224200 | 1.009018028 | 4.04E-05    |
| Os01g0518400 | 1.008515681 | 0.048517288 |
| Os11g0634200 | 1.008352246 | 1.39E-05    |
| Os11g0505300 | 1.007962869 | 0.046801256 |
| Os11g0195100 | 1.007579676 | 1.37E-20    |
| Os02g0664100 | 1.006474548 | 3.03E-06    |

|              |             |             |
|--------------|-------------|-------------|
| Os03g0300400 | 1.006441573 | 0.002589421 |
| Os11g0655300 | 1.006113059 | 0.033568647 |
| Os09g0131400 | 1.005825119 | 1.13E-60    |
| Os06g0125300 | 1.005457735 | 0.000121551 |
| Os02g0481900 | 1.004271217 | 5.90E-08    |
| Os08g0162300 | 1.00386325  | 2.94E-05    |
| Os02g0241600 | 1.003150593 | 1.17E-16    |
| Os03g0242200 | 1.002654594 | 5.99E-25    |
| Os12g0210000 | 1.00251642  | 1.35E-19    |
| Os07g0531900 | 1.002106679 | 3.53E-36    |
| Os06g0361500 | 1.001301525 | 1.94E-34    |
| Os07g0149300 | 1.001165806 | 5.40E-05    |
| Os11g0145700 | 1.000929349 | 0.000231413 |
| Os01g0848400 | 1.000768917 | 0.004107713 |
| Os11g0574725 | 1.000641628 | 0.044981759 |
| Os01g0846000 | 1.000623151 | 1.00E-51    |
| Os02g0701300 | 1.000239849 | 1.56E-60    |
