# Supplementary material
Source: PubMed Central journal article supplement (PMC11373932)
Supplement: PBI-22-915-s002.pdf [file PBI-22-915-s002.pdf]

**Table S2 Primers used in this study**

| <b>Primer name</b> | <b>Primer sequence (5'-3')</b>                                                               |
|--------------------|----------------------------------------------------------------------------------------------|
| GW9-Com            | F:ATGCCTGCAGGTCGACTATTTGTAGAAACATAAGAATG<br>R:CGGGGATCCTCTAGAGCAGCAGCAGCAACCCGAGATG          |
| GW9-actin-GFP      | F:CGATAAGCTTGGGCCCATGTGCCGCCACCAGCCAAGG<br>R:CCTCCTCTTCCGCCATATTTTTCTTTGGATCCGAGCTT          |
| GW9-GUS            | F:GACCATGATTACGAATTGCTTGGGATGCTACCCGGCCCCGA<br>R:TACCCTCAGATCTACCTGGTATCTGCGGACCCGGGGGGT     |
| GW9-Target1        | F:GGCATGTTCTGGGAACCATGTGGA<br>R:AAACTCCACATGGTTCCCAGAACA                                     |
| GW9-Target2        | F:GGCAGGTACCATGTGGCAGCTTTA<br>R:AAACTAAAGCTGCCACATGGTACC                                     |
| GW9-Target3        | F:GGCAGTTTTGGGTTGGTAAACTTC<br>R:AAACGAAGTTTACCAACCCAAAAC                                     |
| GW9-Target4        | F:GGCAATTCATTTGTTCCGGAAACAA<br>R:AAACTTGTTTTCCGAACAAATGAAT                                   |
| GW2-PGEX           | F:CCGGAATTCCTGGGTATGGGGAACAGGATAGGGGGGA<br>R:ATGCGGCCGCTCGAGCTACAACCATGCCAACCCTTGCG          |
| GW9-MBP            | F:TCCGAATTC AAGCTTGTCATGTGCCGTCATCAGCCGCGTGC<br>R:GATGCGGCCGCTCGAGTCTTAATTC TTTTTAGGATCGCTAC |
| GW2-AD             | F:CGGGATCCATCGAGCTATGGGGAACAGGATAGGGGGGAG<br>R:ATCTGCAGCTCGAGCCTACAACCATGCCAACCCTTGCG        |
| GW9-BD-FL          | F:ATGGAGGCCGAATTCATGTGCCGCCACCAGCCAAGG<br>R:TCGACGGATCCCCGGTCAATTTTTCTTTGGATCCGAG            |
| GW9-BD-N1          | F:ATGGAGGCCGAATTCATGTGCCGCCACCAGCCAAGG<br>R:TCGACGGATCCCCGGCACAATATGTGGATGTACATGCC           |
| GW9-BD-N2          | F:ATGGAGGCCGAATTCATGTGCCGCCACCAGCCAAGG<br>R:TCGACGGATCCCCGGCTTAAAGCTGCCACATGGTACC            |
| GW9-BD-N3          | F:ATGGAGGCCGAATTCATGTGCCGCCACCAGCCAAGG<br>R:TCGACGGATCCCCGGCATAGTATTATTGTAGTATTTG            |
| GW9-BD-N4          | F:ATGGAGGCCGAATTCCTAGCTAGACCTACTAATAATG<br>R:TCGACGGATCCCCGGCACAATATGTGGATGTACATGCC          |
| GW9-BD-N5          | F:ATGGAGGCCGAATTCGGGAAGTGTCTTGGGGTAAAATAC<br>R:TCGACGGATCCCCGGCACAATATGTGGATGTACATGCC        |
| GW9-BD-N6          | F:ATGGAGGCCGAATTCAGTTGCTTGACATTTTTGCTCTC<br>R:TCGACGGATCCCCGGCACAATATGTGGATGTACATGCC         |
| GW9-BD-N7          | F:ATGGAGGCCGAATTCACACATATTATAAGGTTGAGATC<br>R:TCGACGGATCCCCGGCAGACTAACATTAACAGCCTGGC         |
| GW9-BD-C1          | F:ATGGAGGCCGAATTCGCTGAGGGAGTTGATCCAAGACA<br>R:TCGACGGATCCCCGGTCAATTTTTCTTTGGATCCGAG          |
| GW9-BD-C2          | F:ATGGAGGCCGAATTCGATGTGCCACCTTCGTCATTG<br>R:TCGACGGATCCCCGGTCAATTTTTCTTTGGATCCGAG            |
| GW2-YN             | F:GAGGAGGATCTTCCCGGGATGGGGAACAGGATAGGGGGGAG<br>R:GCATGCCTGCAGGTCGACTACAACCATGCCAACCCTTGCG    |
| GW2-YC             | F:GGAGCTCGGTACCCGGGATGGGGAACAGGATAGGGGGGAG<br>R:GTATGGGTACATACTAGTCAACCATGCCAACCCTTGCG       |
| GW9-YN             | F:GAGGAGGATCTTCCCGGGATGTGCCGCCACCAGCCAAGGGC<br>R:GCATGCCTGCAGGTCGACTCAATTTTTCTTTGGATCCGAGCT  |
| GW9-YC             | F:GGAGCTCGGTACCCGGGATGTGCCGCCACCAGCCAAGGGC<br>R:GTATGGGTACATACTAGTATTTTTCTTTGGATCCGAGCT      |
| GW9-cluc           | F:CGTACGCGTCCC GGGGCATGTGCCGCCACCAGCCAAGGGCT<br>R:CCCTCTAGAGGATCCCGATTTTTCTTTGGATCCGAGCTTC   |
| GW9-nluc           | F:GGGACGAGCTCGGTACCCATGTGCCGCCACCAGCCAAGGGCT<br>R:GCCCTCGAGAGGATCCCATTTTTCTTTGGATCCGAGCTTC   |
| GW2-nLUC           | F:GGGACGAGCTCGGTACCCATGGGGAACAGGATAGGGGGGAG<br>R:GCCCTCGAGAGGATCCCAACCATGCCAACCCTTGCG        |
| GW2-cLUC           | F:CGTACGCGTCCC GGGGCATGGGGAACAGGATAGGGGGGAG<br>R:CCCTCTAGAGGATCCCGCAACCATGCCAACCCTTGCG       |
| GW9-GFP-Flag       | F:CTTCTGCAGGAGCTCGATGTGCCGCCACCAGCCAAGGGC<br>R:TGCTCACCATGGATCCATTTTTCTTTGGATCCGAGCT         |
| GW2-RFP-HA         | F:CTTCTGCAGGAGCTCGATGGGGAACAGGATAGGGGGGAG                                                    |

R: TGCTCACCATGGATCCCAACCATGCCAACCCTTGCG  
 GW2-Target-1 F: GGCACAAAACCTCCCAGTTATGCTG  
 R: AAACCAGCATAACTGGGAGTTTTG  
 GW2-Target-2 F: GGCATGAGCACCAGCCACCCAGTA  
 R: AAATACTGGGTGGCTGGTGCTCA  
 CYCA1.1 F: GTTTCGGTTGACGAGACGATGT  
 R: CGCTGCAAGGAACCTAGAACTG  
 CAK1A F: GACCGACAAGGGTTTCAGCAT  
 R: CAGCATGTTTCAGGAAGATACAAT  
 CDC20 F: TCGAATCACCTGTTTGTGGC  
 R: TGGAGACAATCCAACGCAAAG  
 CDKA1 F: GGTTCGGACCTTCTCTCTAAAATGC  
 R: AGAGCCTGTCTAGCTGTGATCCTT  
 CDKB F: AAGTTTGGCCAGGAGTGAGCA  
 R: TCAAGAGCATCAGCGTCGAGA  
 CYCA2.1 F: AATATTGAGCGAAACAGGGACAG  
 R: AGGAAGCACACATTTGAGGATTT  
 CYCA2.2 F: AGGTTGTCAAGATGGAGAGCGA  
 R: CGCTTTTTGTCTTCCTGGCA  
 CYCB2.1 F: CGCTTGCAGCAACCGAGTA  
 R: CATCCATCAGCTCAAACCTGTGAT  
 CYCB2.2 F: CTCAAGGCTGCACAATCTGACA  
 R: GCATTGACGGCTGGAATTTG  
 CYCD2.1 F: GATTGGAGTGTTCTTGGAGGAAA  
 R: TGTTCATCCAAGATTCGTCAT  
 CYCD4.1 F: GCCATGGAGTTGATACATCCAA  
 R: CCAGTAGGGCTCCGTGGAAT  
 CYCD4.2 F: TGGTAGAAGAAGACATCGCAGAG  
 R: TCTCCTGGTGCTTGCAGGTT  
 CycH1 F: TGATGTTGACTGACGCTCCTCT  
 R: CAATCAGAATGTTGCCTTGAAAA  
 CYCT1.3 F: GCATTTGTTGCAGCTCAAG  
 R: TCACCACTTCGCTGACTTATTG  
 E2F2 F: TGTGGTGGCTGCCGATAT  
 R: CGCCAGGTGCACCCTTT  
 MACM2 F: AAGTTGGCAAAAGATCCACGG  
 R: CCCCCAAACATAGCTAGTGCAA  
 MACM3 F: TTCATGCGTCACTAAATGCGAG  
 R: TGAATCTGGAAGCCCAATGTTC  
 MACM4 F: CCCGAATGCGATTCTCTGAA  
 R: ACCAGTGGCATGATCAGTTGC  
 MACM5 F: AAGGAGAACTGCCTGTCCATGA  
 R: AGTGGCCTTAGCTTTACCCTC  
 MAD2 F: GAGCCATGCATATTCGACGTG  
 R: GGTGTCGAAGGAATGCAGCTT  
 GL7-RT F: CCCCTAGCATCGACACCAAG  
 R: CGGGTTCAGCACTCCTCT  
 GSN1-RT F: GGAAGGGCAGAGCTTTGACGAT  
 R: CCGCAGAACCGAGTTTGGAGAT  
 GS5-RT F: GTTCTCGGTACTGCGTGGAAG  
 R: ACTCCACAAACCTCCCAGCA  
 GW8-RT F: GGGATGATCAAACCGAGGAG  
 R: GTCAGAGGTGGAGCCAACGA  
 LOG-RT F: GTCAGCGAAGGATTCATAGCG  
 R: CGACCTCGTACTCGGGAACATAC  
 FUWA-RT F: AGCAACATTGTGCGAATAACTCC  
 R: TTCCTGTATCATCCACGGCAA  
 DST-RT F: CGGCTGTTCCCGTGCTTGTCT  
 R: ACCCGATGCTCCGCTCCTTCTT  
 EP3-RT F: GGTGCTCGAATGCCTCACAAG  
 R: AGATAAGGTCATCCGCCCCACA

GW9-RT

F:TATCATTTCAGCGCCGATCCAT

R:TCAGGCTCCTCTTCTTCCGTC

ACTIN-RT

F:TGCTATGTACGTCGCCATCCAG

R:AATGAGTAACCACGCTCCGTCA

## **Primer description**

complement construct

over expression construct

GUS stain construct

Crispr-cas9 construct

Crispr-cas9 construct

Crispr-cas9 construct

Crispr-cas9 construct

Protein expression construct

Protein expression construct

Y2H construct

BiFC construct

BiFC construct

BiFC construct

BiFC construct

LCI construct

LCI construct

LCI construct

LCI construct

GFP construct

RFP-HA construct

Crispr-cas9 construct

Crispr-cas9 construct

qPCR analysis

qPCR analysis
