# Supplementary material
Source: PubMed Central journal article supplement (PMC11373932)
Supplement: PBI-22-915-s004.pdf [file PBI-22-915-s004.pdf]

**Table S1 Annotated genes included in the 50.2 kb region for GW9**

| <b>Gene ID</b>        | <b>Annotation from the Rice Genome Annotation Project</b> |
|-----------------------|-----------------------------------------------------------|
| <i>LOC_Os09g13590</i> | expressed protein                                         |
| <i>LOC_Os09g13600</i> | expressed protein                                         |
| <i>LOC_Os09g13610</i> | mediator subunit 25,Os MED25                              |
| <i>LOC_Os09g13630</i> | suppressor of Zeste;polycomb group gene, OsEMF2b          |
